# Supplementary material for: Genetic Dissection of Grain Yield Component Traits Under High Nighttime Temperature Stress in a Rice Diversity Panel
Source: Front Plant Sci. 2021 Sep 28;12:712167. doi: 10.3389/fpls.2021.712167 (PMC8508263; doi:10.3389/fpls.2021.712167)
Supplement: Supplementary file 2 [file Table_1.xlsx]

## Sheet: Supplementary Table 1
Supplimentary Table 1| List of 190 diverse rice accessions of the USDA Rice Mini-core-Collections used in the study
S.No.	GSOR #	Accession Name	Country of Origin	Ancestry	HD	PH
1	GSOR310007	Karang Serang	Indonesia	TRJ	105	166.667
2	GSOR310015	Mayang Khang	Indonesia	IND	94	141.333
3	GSOR310020	E B Gopher	United States	TRJ-TEJ	101	125.333
4	GSOR310023	RD 218	Dominican Republic	TRJ-TEJ-ARO	125	147.667
5	GSOR310039	C 5560	Thailand	TRJ	102	134.667
6	GSOR310045	Leah	United States	TRJ	91	99
7	GSOR310052	Quinimpol	Philippines	TRJ	102	153.667
8	GSOR310080	TAICHU MOCHI 59	Taiwan	TRJ	119	122
9	GSOR310087	WC 2811	Micronesia	TRJ	96	144.667
10	GSOR310100	Ao Chiu 2 Hao	China	IND	110	169.333
11	GSOR310111	Bombilla	Spain	TEJ	80	114
12	GSOR310131	Secano do Brazil	El Salvador	TRJ	99	130.333
13	GSOR310134	BERLIN	Costa Rica	IND	133	200.667
14	GSOR310144	British Honduras Creole	Belize	TRJ	96	142.333
15	GSOR310156	Sel. No. 388	Uruguay	TEJ-TRJ	93	137.333
16	GSOR310161	SHIMIZU MOCHI	Japan	TEJ	80	126.333
17	GSOR310196	81B/25	Suriname	IND	119	142.667
18	GSOR310200	Chin Chin	Panama	IND	103	173.333
19	GSOR310204	Italica Carolina	Poland	TEJ	70	97
20	GSOR310210	KRASNODARSKIJ 424	Russian Federation	TEJ	71	119.333
21	GSOR310211	Pergonil 15	Portugal	TEJ	82	114.667
22	GSOR310219	Red Khosha Cerma	Afghanistan	ARO	87	132.333
23	GSOR310220	Safut Khosha	Afghanistan	AUS	99	152.333
24	GSOR310226	NORIN 11	Japan	TEJ	53	77.3333
25	GSOR310238	R 75	Senegal	TRJ	97	126.667
26	GSOR310241	UZ ROSZ M38	Uzbekistan	TEJ	71	110.667
27	GSOR310301	H57-3-1	Argentina	TEJ	87	129.667
28	GSOR310317	IARI 6626	India	AUS	91	127.333
29	GSOR310338	Khao Luang	Laos	TRJ-TEJ-ARO	107	134
30	GSOR310345	J.P. 5	Australia	TEJ	110	152
31	GSOR310348	C 8429	Papua New Guinea	TRJ	103	143.333
32	GSOR310351	Warrangal Culture 1252	India	IND	100	142.333
33	GSOR310354	Padi Pohon Batu	Malaysia	TRJ	96	157
34	GSOR310381	NC 1/536	Pakistan	AUS	91	135
35	GSOR310389	Won Son Zo No. 11	Korea	IND	90	141.667
36	GSOR310397	Chacareiro Uruguay	Uruguay	TEJ	90	154.667
37	GSOR310399	Doble Carolina	Uruguay	AUS	94	122.667
38	GSOR310415	Ai Chueh Ta Pai Ku	Taiwan	IND	91	160.667
39	GSOR310420	Thang 10	Vietnam	IND	111	128.333
40	GSOR310428	Sipirasikkam	Indonesia	TRJ	106	177.333
41	GSOR310442	TJ	Guyana	IND	84	147
42	GSOR310440	PD 46	Sri Lanka	IND	90	168
43	GSOR310471	PATNAI 6	Myanmar	AUS	95	151.667
44	GSOR310475	K8C-263-3	Suriname	IND	119	190
45	GSOR310480	Djimoron	Guinea	IND	80	124
46	GSOR310481	Anandi	India	IND	128	173.333
47	GSOR310489	Chun 118-33	China	IND	106	166.333
48	GSOR310494	WW 8/2290	Netherlands	TRJ-IND-AUS	121	145.333
49	GSOR310503	Manga Kely 694	Madagascar	IND-AUS	106	172.667
50	GSOR310510	BLUE STICK	Fiji	TEJ	131	144
51	GSOR310519	GUYANE 1	Chad	IND	122	177.333
52	GSOR310546	MAHSURI	Malaysia	IND	140	138.333
53	GSOR310566	INIAP 7	Ecuador	IND	109	109.333
54	GSOR310588	Onu B	Zaire	IND	98	153.667
55	GSOR310598	Red	Pakistan	AUS-IND-TEJ	108	173
56	GSOR310615	Dichroa Alef Uslkij	Kazakhstan	TRJ	110	106.667
57	GSOR310630	BKN 6987-68-14	Thailand	IND	117	103
58	GSOR310632	IR 4482-5-3-9-5	Philippines	IND	132	130
59	GSOR310645	MOROBEREKAN	Guinea	TRJ	109	135
60	GSOR310670	KUBANETS 508	Russian Federation	TEJ	71	107.667
61	GSOR310687	IR 9660-48-1-1-2	Philippines	IND	122	95.6667
62	GSOR310693	Bakiella 1	Sri Lanka	TEJ-TRJ-ARO	106	188.667
63	GSOR310703	N-2703	Nepal	AUS	96	179
64	GSOR310714	TCHAMPA	Iran	AUS	88	164.333
65	GSOR310715	PHUDUGEY	Bhutan	AUS	93	154.333
66	GSOR310723	WIR 3039	Tajikistan	AUS	81	119.333
67	GSOR310747	BHIM DHAN	Nepal	TEJ-TRJ-ARO	105	174.333
68	GSOR310757	RP2151-173-1-8	India	IND	106	116.333
69	GSOR310767	HB-6-2	Hungary	TEJ	70	105
70	GSOR310773	ECIA76-S89-1	Cuba	IND	97	120
71	GSOR310777	WC 3532	Peru	TRJ	94	140
72	GSOR310779	GPNO 1106	Guatemala	TRJ	98	142.667
73	GSOR310788	Toga	India	IND	109	174.333
74	GSOR310791	Kin Shan Zim	China	IND	79	136
75	GSOR310799	Ragasu	Taiwan	TRJ-TEJ	90	118
76	GSOR310801	Tobura	Taiwan	TEJ--TEJ	169	140.667
77	GSOR310802	Tamanishiki	Japan	TEJ	117	121.333
78	GSOR310809	Yong Chal Byo	Korea, South	TEJ	88	148
79	GSOR310814	Grassy	Haiti	TRJ	96	153.667
80	GSOR310836	GPNO 5055	United States	TRJ	103	136
81	GSOR310846	Kao Chio Lin Chou	Taiwan	IND	92	159.667
82	GSOR310849	Pan Ju	China	IND	89	149.667
83	GSOR310861	Niwahutaw Mochi	Japan	TEJ	102	120.667
84	GSOR310879	6360	Turkey	TEJ	87	133.667
85	GSOR310883	Somewake	Japan	TEJ	84	130.333
86	GSOR310887	Buphopa	Myanmar	ARO-TEJ-TRJ	116	116
87	GSOR310901	Juppa	Nepal	IND	181	120
88	GSOR310906	Ardito	Italy	TEJ	85	120.667
89	GSOR310910	TAINO 38	Taiwan	AUS-IND-TEJ-TRJ	101	171.333
90	GSOR310932	17-9-4	Mexico	IND	163	156.667
91	GSOR310945	Dular	India	AUS	85	138.333
92	GSOR310950	NANTON NO. 131	Taiwan	TRJ-TEJ-ARO	140	160.667
93	GSOR310958	2	Afghanistan	TRJ-TEJ-IND	93	143.333
94	GSOR310965	Vary Tarva Osla	Portugal	TEJ	87	120.667
95	GSOR310984	CSORNUJ	Hungary	TEJ	56	110.333
96	GSOR310990	R 67	Senegal	TRJ	96	154
97	GSOR310997	LUSITANO	Portugal	TEJ	70	102
98	GSOR310998	WC 4443	Bolivia	TEJ	104	131.333
99	GSOR311016	IR 238	Philippines	IND	93	96.6667
100	GSOR311046	IARI 6621	India	AUS	94	163
101	GSOR311074	Mitak	Indonesia	TRJ	86	164.333
102	GSOR311078	Gazan	Afghanistan	TEJ	85	136
103	GSOR311100	ARC 6578	India	AUS	96	167.333
104	GSOR311105	Hsin Hsing Pai Ku	Taiwan	IND	92	166.667
105	GSOR311111	99216	India	AUS	95	148
106	GSOR311113	Shui Ya Jien	Hong Kong	IND	110	172.333
107	GSOR311117	Tranoeup Beykher	Cambodia	IND	141	165
108	GSOR311123	10340	Italy	IND	181	127
109	GSOR311140	AKP 4	India	IND	175	123
110	GSOR311141	SORNAVARI	Mali	AUS	117	153
111	GSOR311151	TD 70	Thailand	TEJ	94	150
112	GSOR311153	IR 2061-214-2-3	Philippines	IND	92	111.667
113	GSOR311167	TAINUNG 45	Taiwan	IND	141	180.333
114	GSOR311173	Manga 629	Madagascar	IND-AUS	108	190.667
115	GSOR311180	Sapundali Local	India	IND-AUS	111	173.667
116	GSOR311181	Tauli	Nepal	AUS	80	150.333
117	GSOR311185	Bombon	Spain	TEJ	89	131
118	GSOR311188	Dara	Indonesia	AUS	94	162.667
119	GSOR311206	79	Guyana	ARO	96	172
120	GSOR311249	TONO BREA 439	Dominican Republic	IND	136	182.333
121	GSOR311255	Saraya	Fiji	AUS	82	148
122	GSOR311258	Botika S/R	Zaire	TRJ	97	166.667
123	GSOR311266	CO 13	India	IND	133	196
124	GSOR311278	Montakcl	Egypt	AUS	116	181.667
125	GSOR311281	A 152	Bangladesh	IND-TRJ	100	144.333
126	GSOR311286	UZ ROS 59	Uzbekistan	IND	93	158
127	GSOR311327	Gasym Hany	Azerbaijan	ARO	83	123.333
128	GSOR311383	DARMALI	Nepal	TEJ-ARO-TRJ	123	177.333
129	GSOR311385	KAUKKYI ANI	Myanmar	TRJ	145	128.667
130	GSOR311393	Celiaj	Azerbaijan	TEJ	79	131.333
131	GSOR311417	CNTLR80076-44-1-1-1	Thailand	IND	101	130.333
132	GSOR311423	IR 58614-B-B-8-2	Philippines	IND	101	127.333
133	GSOR311435	CM1, HAIPONG	Vietnam	IND	114	128
134	GSOR311466	KECHENGNUO NO. 4	China	IND	102	123.333
135	GSOR311483	4484	China	IND	97	107.333
136	GSOR311484	4595	China	IND	90	99.3333
137	GSOR311491	YOU-I B	China	IND	75	87.3333
138	GSOR311497	CHUNJIANGZAO NO. 1	China	IND	74	79.6667
139	GSOR311532	Egyptian Wild Type	Turkey	TEJ	119	135
140	GSOR311537	A 5	Japan	TEJ	47	105.333
141	GSOR311539	C.B. II	Japan	AUS	83	158
142	GSOR311544	Gallawa	Sri Lanka	AUS	94	159
143	GSOR311554	Srav Prapay	Cambodia	IND	71	141.667
144	GSOR311561	Nang Bang Bentre	Vietnam	AUS	72	146
145	GSOR311563	DNJ 179	Bangladesh	AUS	72	155.667
146	GSOR311572	DJ 24	Bangladesh	AUS	83	160
147	GSOR311573	DJ 102	Bangladesh	AUS	74	149.667
148	GSOR311576	DNJ 121	Bangladesh	AUS	69	173.667
149	GSOR311586	Santhi 990	Pakistan	ARO-IND-AUS	56	89.3333
150	GSOR311592	UZ ROS 7-13	Uzbekistan	AUS	88	162
151	GSOR311596	SL 22-620	Sierra Leone	AUS	91	148.667
152	GSOR311613	Spin Mere	Afghanistan	AUS	89	185.333
153	GSOR311620	Romeno	Portugal	TEJ	75	140
154	GSOR311635	AMANE	Sri Lanka	IND	98	172.667
155	GSOR311642	Tia Bura	Indonesia	TRJ	87	184.667
156	GSOR311643	Padi Tarab Arab	Malaysia	TRJ	101	195.333
157	GSOR311644	P 35	India	AUS	108	133.333
158	GSOR311654	CAROLINO 164	Chad	AUS	79	148.667
159	GSOR311656	ASWINA 330	Bangladesh	AUS	87	155.333
160	GSOR311667	HKG 98	Mali	AUS	87	174
161	GSOR311668	Daudzai Field Mix	Pakistan	AUS	95	169
162	GSOR311669	JP 5	Pakistan	AUS-IND	114	195
163	GSOR311677	Karabaschak	Bulgaria	TEJ	71	153
164	GSOR311684	Hi Muke	Kazakhstan	AUS	79	167
165	GSOR311685	WIR 911	Russian Federation	TEJ	60	119.667
166	GSOR311710	Lua Chua Chan	Vietnam	TRJ	110	154.667
167	GSOR311713	Sereno	Jamaica	IND	136	192.667
168	GSOR311725	A 36-3	Myanmar	IND	139	157
169	GSOR311734	ARC 10633	India	IND	116	184.667
170	GSOR311735	Simpor	Brunei	TRJ	113	136
171	GSOR311736	Coppocina	Bulgaria	TRJ	108	153
172	GSOR311739	FUJISAKA 5	Japan	IND	100	147
173	GSOR311741	SOC NAU	Vietnam	IND	105	138
174	GSOR311744	Heo Trang	Vietnam	IND	119	172.66
175	GSOR311745	WONG CHIM	Hong Kong	IND	110	158.365
176	GSOR311751	Magoti	Burundi	IND	105	142.324
177	GSOR311765	Pa Boup	Sierra Leone	AUS	96	174.667
178	GSOR311769	Pakkali	Philippines	ARO	175	146
179	GSOR311775	THAVALU	Sri Lanka	AUS	117	182.333
180	GSOR311779	WC 10253	Uncertain	TRJ-IND-AUS	92	176
181	GSOR311787	KRASNODARSKIJ 3352	Russian Federation	TEJ	74	109.667
182	GSOR311788	EMBRAPA 1200	Brazil	TRJ	99	85.3333
183	GSOR311790	WAB462-10-3-1	Cote D'Ivoire	TRJ	90	107.667
184	GSOR311792	Cypress	United States	TRJ	103	100
185	GSOR311793	IR64	Philippines	IND	109	105.333
186	Arkansas Rice Cultivar	Bengal	United States	TRJ	94	97.052
187	Arkansas Rice Cultivar	IRAT177	United States	TRJ	95	110
188	Arkansas Rice Cultivar	Kaybonnet	United States	TRJ	96	108
189	Indian Rice Cultivar	Nagina 22	India	IND	92	110
190	Indian Rice Cultivar	Vandana	India	AUS	90	115
GSOR=Genetic Stocks Oryza, TRJ=Tropical Japonica, TEJ=Temprate Japonica, IND=Indica, ARO=Aromatic, HD=Heading Days, PH=Plant Height (cm)

## Sheet: Supplementary Table 2
Supplemntary Table 2 | List of genome-wide significant SNPs associated with panicle length (cm) in a panel of 190 diverse rice accessions of the URMC, consisting of the Combined, Indica, and Japonica populations under high nighttime temperature (HNT)stress.
Population	Locus	SNPa	Chrb	Position (bp)	Alleles (F/A)c	MAFd	Allelic effect	P-value	%PVEe
Combined	1	1-34625578	1	34625578	T/C	0.299	-2.2967	1.45582e-07	6.54958
	2	1-29464488	1	29464488	T/C	0.483	-2.05723	1.34564e-06	6.79553
	3	1-34625560	1	34625560	C/T	0.155	2.22674	1.75656e-06	5.72966
	4	1-34625563	1	34625563	C/T	0.155	2.22674	1.75656e-06	5.72966
	5	1-34625636	1	34625636	C/T	0.155	2.22674	1.75656e-06	5.72966
	6	1-34556189	1	34556189	G/A	0.304	-2.16204	2.02614e-06	5.98391
	7	1-34507506	1	34507506	C/T	0.315	-2.1245	2.09843e-06	6.16566
	8	1-34494795	1	34494795	G/A	0.304	-2.17736	2.18287e-06	5.86747
	9	1-34625629	1	34625629	G/A	0.156	2.20261	2.31547e-06	5.71237
	10	1-34496214	1	34496214	T/C	0.297	-2.10073	2.39195e-06	6.22705
	11	1-34690395	1	34690395	C/A	0.191	1.88699	3.25955e-06	7.40488
	12	1-34496208	1	34496208	C/T	0.298	-2.0794	3.27228e-06	6.17653
	13	1-34601811	1	34601811	G/A	0.304	-2.10217	3.3629e-06	6.03692
	14	1-34625657	1	34625657	C/T	0.29	-2.11075	3.4907e-06	5.9711
	15	1-34495812	1	34495812	T/C	0.309	-1.96842	4.13045e-06	6.70411
	16	1-34495688	1	34495688	T/C	0.303	-2.0876	4.44339e-06	5.96566
	17	1-34496224	1	34496224	G/C	0.298	-2.04326	4.49674e-06	6.20445
	18	1-34496226	1	34496226	A/C	0.298	-2.04326	4.49674e-06	6.20445
	19	1-34672837	1	34672837	C/G	0.31	-2.128	4.51882e-06	5.7454
	20	1-34673823	1	34673823	G/A	0.31	-2.128	4.51882e-06	5.7454
	21	1-34673831	1	34673831	G/A	0.31	-2.128	4.51882e-06	5.7454
	22	1-34674027	1	34674027	C/A	0.31	-2.128	4.51882e-06	5.7454
	23	1-34494760	1	34494760	C/A	0.305	-2.0727	4.60493e-06	6.027
	24	1-34494994	1	34494994	T/C	0.299	-2.04395	4.83259e-06	6.16013
	25	1-34495625	1	34495625	A/T	0.299	-2.04395	4.83259e-06	6.16013
	26	1-34495200	1	34495200	A/C	0.307	-2.05459	5.05843e-06	6.07499
	27	1-34578315	1	34578315	C/T	0.37	-1.90018	5.41028e-06	6.98736
	28	1-34495653	1	34495653	G/A	0.305	-2.00883	5.5742e-06	6.28107
	29	1-34496096	1	34496096	A/G	0.301	-2.02355	5.74712e-06	6.17818
	30	1-34625666	1	34625666	C/T	0.153	2.12872	6.08513e-06	5.58642
	31	1-34496256	1	34496256	T/C	0.296	-2.01234	6.56867e-06	6.16596
	32	1-34579024	1	34579024	G/A	0.152	2.10952	6.68807e-06	5.6327
	33	1-34496031	1	34496031	G/A	0.298	-1.99819	6.90626e-06	6.21887
	34	1-34611721	1	34611721	A/G	0.301	-2.01662	6.93359e-06	6.11038
	35	1-34611725	1	34611725	T/C	0.301	-2.01662	6.93359e-06	6.11038
	36	1-34495540	1	34495540	T/A	0.302	-1.998	6.9474e-06	6.21654
	37	1-34681989	1	34681989	T/A	0.304	-2.04128	7.06269e-06	5.96205
	38	1-34493091	1	34493091	G/A	0.276	-2.0198	7.13051e-06	6.0763
	39	1-34496086	1	34496086	A/C	0.306	-1.99623	7.19552e-06	6.20638
	40	1-32011117	1	32011117	C/T	0.32	-1.80844	7.54971e-06	7.42783
	41	1-34513509	1	34513509	T/C	0.151	2.10686	7.72874e-06	5.56935
	42	1-34494678	1	34494678	T/G	0.297	-2.00354	7.77665e-06	6.11888
	43	1-34672445	1	34672445	C/T	0.135	2.20748	8.03902e-06	5.07926
	44	1-34495886	1	34495886	T/C	0.308	-1.9765	8.30187e-06	6.23805
	45	1-28474271	1	28474271	C/T	0.159	1.83369	8.38889e-06	7.16802
	46	1-28632176	1	28632176	A/T	0.315	-1.97007	8.45484e-06	6.26537
	47	1-34537125	1	34537125	C/G	0.127	2.25802	8.59406e-06	4.83406
	48	1-34495847	1	34495847	A/G	0.299	-1.9284	9.118e-06	6.47441
	49	1-34494882	1	34494882	G/A	0.315	-1.96353	9.62799e-06	6.22644
	50	1-34503684	1	34503684	A/G	0.298	-1.98813	9.67237e-06	6.07993
	51	1-34619326	1	34619326	T/C	0.311	-1.96405	9.87812e-06	6.20794
	52	1-34596940	1	34596940	C/T	0.143	2.14072	9.93034e-06	5.27473
	53	2-8478667	2	8478667	T/C	0.054	4.38487	3.52782e-06	1.44871
	54	4-2498147	4	2498147	G/T	0.32	1.6021	6.75402e-07	11.3102
	55	4-2499668	4	2499668	G/T	0.32	1.59736	9.65142e-07	11.0691
	56	4-2499479	4	2499479	T/C	0.31	1.54459	2.01491e-06	11.0928
	57	4-2497225	4	2497225	G/A	0.367	1.41673	3.82231e-06	12.2616
	58	4-13601649	4	13601649	T/C	0.054	-4.21585	6.8032e-06	1.47001
	59	4-2499528	4	2499528	G/A	0.262	1.52438	7.97185e-06	10.0969
	60	4-2499585	4	2499585	C/T	0.261	1.51946	8.38496e-06	10.1091
	61	4-24121294	4	24121294	G/A	0.28	3.09014	9.5114e-06	2.61408
	62	5-11958486	5	11958486	T/C	0.094	4.41867	1.41504e-07	1.86218
	63	5-2503789	5	2503789	G/A	0.061	4.54843	1.69699e-06	1.44015
	64	5-27297844	5	27297844	T/C	0.391	-1.8054	2.68148e-06	8.16983
	65	5-6640270	5	6640270	A/G	0.156	2.92931	3.19189e-06	3.21801
	66	5-2503786	5	2503786	G/A	0.058	4.44803	3.77976e-06	1.39938
	67	5-2503792	5	2503792	A/G	0.058	4.39824	5.1122e-06	1.39036
	68	8-12484151	8	12484151	A/G	0.463	1.89414	7.35631e-07	8.30587
	69	8-12492857	8	12492857	G/A	0.106	3.75997	5.46372e-06	1.88074
	70	8-12423948	8	12423948	C/T	0.281	1.66579	6.48159e-06	8.76114
	71	9-1462553	9	1462553	A/G	0.398	2.00722	2.30285e-08	9.47541
	72	9-1906932	9	1906932	C/T	0.478	2.11443	3.26748e-07	7.20757
	73	9-1671387	9	1671387	T/C	0.331	1.94844	3.71519e-06	6.8975
	74	9-1883874	9	1883874	C/T	0.32	-1.82687	4.06974e-06	7.71025
	75	9-1886473	9	1886473	G/A	0.188	2.16388	8.04521e-06	5.27471
	76	9-19398119	9	19398119	C/T	0.251	-1.99418	8.79431e-06	6.10098
	77	10-1022162	10	1022162	A/G	0.158	3.18638	1.53679e-06	2.9162
	78	10-8147003	10	8147003	C/T	0.065	4.33122	3.12493e-06	1.50106
	79	10-5879261	10	5879261	A/G	0.085	-3.29845	8.4997e-06	2.3277
	80	11-13172192	11	13172192	C/G	0.328	3.48933	3.37093e-06	2.27826
	81	11-4880723	11	4880723	C/T	0.065	3.85105	6.42658e-06	1.7664
	82	11-2026892	11	2026892	C/A	0.05	2.8356	7.04939e-06	3.18162
	83	12-21832773	12	21832773	T/A	0.055	-2.75368	9.42007e-06	3.2729
Indica	1	1-16697127	1	16697127	C/T	0.055	-5.00381	2.26898e-07	1.50037
	2	1-39383980	1	39383980	C/T	0.056	-4.49386	2.78435e-06	1.48706
	3	1-18957652	1	18957652	C/G	0.333	-1.70094	5.79628e-06	8.91737
	4	1-17925732	1	17925732	G/A	0.245	3.13089	5.8286e-06	2.80691
	5	1-41250350	1	41250350	G/A	0.198	-2.35657	7.2937e-06	4.74381
	6	1-6428322	1	6428322	G/A	0.109	-3.35804	8.07233e-06	2.369
	7	1-41276762	1	41276762	G/A	0.186	-2.34027	8.41226e-06	4.73842
	8	2-29166473	2	29166473	C/T	0.401	-2.98498	4.96305e-07	3.85272
	9	2-24382675	2	24382675	G/T	0.069	-2.97744	1.63186e-06	3.49227
	10	2-14568512	2	14568512	A/G	0.401	-2.1792	2.96272e-06	5.99772
	11	2-14389411	2	14389411	C/G	0.333	-1.96847	3.99743e-06	7.05556
	12	2-14718981	2	14718981	A/G	0.314	-1.94959	4.05979e-06	7.17272
	13	2-15415834	2	15415834	A/G	0.303	-2.00519	8.94233e-06	6.30695
	14	2-19855072	2	19855072	C/T	0.412	-2.96047	9.62475e-06	2.97285
	15	3-21403921	3	21403921	T/C	0.485	-3.29682	5.06971e-08	3.79865
	16	3-18707478	3	18707478	G/A	0.176	2.88598	2.03506e-06	3.63505
	17	3-19209801	3	19209801	C/T	0.24	2.56011	3.67858e-06	4.32944
	18	3-3065213	3	3065213	A/G	0.158	-2.30158	5.82159e-06	5.07361
	19	4-7290964	4	7290964	T/C	0.475	-4.19692	2.00088e-06	1.7552
	20	4-2724003	4	2724003	T/A	0.184	-2.96569	4.83436e-06	3.17666
	21	5-11086936	5	11086936	C/A	0.05	-5.2066	7.07414e-06	1.01311
	22	5-12263553	5	12263553	C/T	0.092	-3.83493	9.44433e-06	1.79678
	23	6-2339061	6	2339061	A/T	0.358	3.50373	3.24544e-06	2.3878
	24	6-1299441	6	1299441	T/A	0.088	4.4942	5.66856e-06	1.38614
	25	6-17893454	6	17893454	C/T	0.439	5.74285	8.12948e-06	0.822212
	26	7-25699169	7	25699169	G/A	0.405	5.10358	1.20127e-06	1.25124
	27	7-25699170	7	25699170	G/T	0.405	5.10358	1.20127e-06	1.25124
	28	7-25699167	7	25699167	C/T	0.41	5.1344	4.55977e-06	1.08913
	29	7-24265876	7	24265876	G/A	0.5	-5.26193	7.65503e-06	0.984011
	30	7-25699158	7	25699158	A/C	0.411	5.0131	8.3189e-06	1.07365
	31	7-8004557	7	8004557	C/T	0.5	-4.60767	8.36417e-06	1.26768
	32	7-24265874	7	24265874	T/C	0.5	-5.59072	9.13988e-06	0.856517
	33	8-2077968	8	2077968	T/G	0.289	3.43375	1.25375e-06	2.71251
	34	8-28310373	8	28310373	A/T	0.248	3.25478	1.72694e-06	2.92409
	35	8-21145295	8	21145295	C/T	0.147	-3.1255	1.81566e-06	3.14876
	36	8-28224765	8	28224765	A/G	0.108	-2.78157	3.28158e-06	3.73235
	37	8-28357126	8	28357126	G/T	0.113	-2.93762	6.13497e-06	3.16004
	38	9-19410675	9	19410675	T/C	0.5	-3.49206	1.0388e-08	3.79794
	39	9-21132155	9	21132155	G/A	0.262	3.44288	3.56902e-07	3.0051
	40	9-21132150	9	21132150	A/G	0.265	3.39197	4.90107e-07	3.01296
	41	9-21132151	9	21132151	G/C	0.265	3.39197	4.90107e-07	3.01296
	42	9-8078467	9	8078467	C/T	0.149	-2.2066	2.13712e-06	6.03491
	43	9-8036903	9	8036903	G/A	0.147	-2.19822	2.19455e-06	6.06378
	44	9-8069525	9	8069525	G/A	0.135	-2.28045	2.84971e-06	5.52542
	45	9-8071239	9	8071239	G/A	0.183	-2.01602	3.27809e-06	6.87397
	46	9-2522701	9	2522701	G/A	0.313	3.0739	3.56782e-06	3.05242
	47	9-1566622	9	1566622	T/C	0.418	4.29713	5.70755e-06	1.51317
	48	9-13635452	9	13635452	A/T	0.232	-2.52015	7.60178e-06	4.15546
	49	9-8038633	9	8038633	G/A	0.137	-2.26239	7.98714e-06	5.07996
	50	9-19410695	9	19410695	T/C	0.455	-2.84812	8.07967e-06	3.26276
	51	9-8558552	9	8558552	G/A	0.088	-2.77651	8.09148e-06	3.42687
	52	9-20741312	9	20741312	C/A	0.059	-4.51874	9.13847e-06	1.30519
	53	9-2347826	9	2347826	G/A	0.243	3.04131	9.55074e-06	2.82359
	54	10-9270471	10	9270471	G/C	0.206	3.55863	1.7037e-07	2.99064
	55	10-9270488	10	9270488	T/C	0.235	3.10607	6.36534e-06	2.82553
	56	10-3485203	10	3485203	T/A	0.117	-4.36379	8.04073e-06	1.41711
	57	11-18077235	11	18077235	G/T	0.281	-2.02954	5.85827e-07	7.87147
	58	11-17325103	11	17325103	A/T	0.163	-2.59842	3.9687e-06	4.17763
	59	12-12739412	12	12739412	A/T	0.293	3.45566	3.05727e-06	2.46713
	60	12-7884596	12	7884596	C/T	0.222	-3.13056	6.06549e-06	2.79628
Japonica	1	1-34666826	1	34666826	C/T	0.27	2.88252	2.12496e-08	5.54626
	2	1-34625560	1	34625560	C/T	0.34	2.60249	2.39138e-08	6.66315
	3	1-34625563	1	34625563	C/T	0.34	2.60249	2.39138e-08	6.66315
	4	1-34625589	1	34625589	C/T	0.34	2.60249	2.39138e-08	6.66315
	5	1-34625629	1	34625629	G/A	0.34	2.60249	2.39138e-08	6.66315
	6	1-34625636	1	34625636	C/T	0.34	2.60249	2.39138e-08	6.66315
	7	1-34667038	1	34667038	A/C	0.304	2.67853	3.26173e-08	6.17347
	8	1-34666828	1	34666828	C/T	0.277	2.78753	4.04276e-08	5.63724
	9	1-34666831	1	34666831	G/A	0.277	2.78753	4.04276e-08	5.63724
	10	1-34659270	1	34659270	A/T	0.285	2.75103	4.22743e-08	5.75996
	11	1-34698108	1	34698108	G/T	0.291	2.68649	4.86456e-08	5.96064
	12	1-34667274	1	34667274	C/G	0.291	2.68481	4.98109e-08	5.95709
	13	1-34667275	1	34667275	T/C	0.291	2.68481	4.98109e-08	5.95709
	14	1-34672300	1	34672300	C/A	0.291	2.67416	5.78622e-08	5.9347
	15	1-34670549	1	34670549	A/G	0.291	2.67223	5.94526e-08	5.93066
	16	1-34661072	1	34661072	A/G	0.288	2.71695	6.37864e-08	5.71762
	17	1-34688921	1	34688921	C/T	0.293	2.6614	6.55464e-08	5.93219
	18	1-34657693	1	34657693	A/T	0.284	2.70698	6.58593e-08	5.74342
	19	1-34660891	1	34660891	G/A	0.299	2.67309	7.28927e-08	5.8361
	20	1-34708012	1	34708012	A/G	0.304	2.62182	7.34763e-08	6.04894
	21	1-34690265	1	34690265	C/G	0.295	2.66056	7.77042e-08	5.85926
	22	1-34690266	1	34690266	G/T	0.295	2.66056	7.77042e-08	5.85926
	23	1-34657365	1	34657365	G/A	0.287	2.64389	7.95973e-08	5.91808
	24	1-34657794	1	34657794	G/A	0.287	2.64389	7.95973e-08	5.91808
	25	1-34658242	1	34658242	C/G	0.287	2.64389	7.95973e-08	5.91808
	26	1-34659382	1	34659382	G/A	0.287	2.64389	7.95973e-08	5.91808
	27	1-34659427	1	34659427	C/T	0.287	2.64389	7.95973e-08	5.91808
	28	1-34665425	1	34665425	A/T	0.287	2.64389	7.95973e-08	5.91808
	29	1-34666630	1	34666630	A/G	0.287	2.64389	7.95973e-08	5.91808
	30	1-34667180	1	34667180	C/T	0.287	2.64389	7.95973e-08	5.91808
	31	1-34667214	1	34667214	G/A	0.287	2.64389	7.95973e-08	5.91808
	32	1-34667225	1	34667225	T/C	0.287	2.64389	7.95973e-08	5.91808
	33	1-34667253	1	34667253	C/A	0.287	2.64389	7.95973e-08	5.91808
	34	1-34667490	1	34667490	C/T	0.287	2.64389	7.95973e-08	5.91808
	35	1-34667618	1	34667618	G/A	0.287	2.64389	7.95973e-08	5.91808
	36	1-34667993	1	34667993	T/G	0.287	2.64389	7.95973e-08	5.91808
	37	1-34668041	1	34668041	T/A	0.287	2.64389	7.95973e-08	5.91808
	38	1-34668282	1	34668282	T/C	0.287	2.64389	7.95973e-08	5.91808
	39	1-34669001	1	34669001	C/T	0.287	2.64389	7.95973e-08	5.91808
	40	1-34669288	1	34669288	C/T	0.287	2.64389	7.95973e-08	5.91808
	41	1-34669334	1	34669334	G/A	0.287	2.64389	7.95973e-08	5.91808
	42	1-34669541	1	34669541	C/T	0.287	2.64389	7.95973e-08	5.91808
	43	1-34669609	1	34669609	A/G	0.287	2.64389	7.95973e-08	5.91808
	44	1-34671160	1	34671160	A/T	0.287	2.64389	7.95973e-08	5.91808
	45	1-34671689	1	34671689	T/C	0.287	2.64389	7.95973e-08	5.91808
	46	1-34672625	1	34672625	T/C	0.287	2.64389	7.95973e-08	5.91808
	47	1-34673057	1	34673057	G/A	0.287	2.64389	7.95973e-08	5.91808
	48	1-34673084	1	34673084	A/G	0.287	2.64389	7.95973e-08	5.91808
	49	1-34673767	1	34673767	C/A	0.287	2.64389	7.95973e-08	5.91808
	50	1-34673780	1	34673780	T/C	0.287	2.64389	7.95973e-08	5.91808
	51	1-34674369	1	34674369	G/T	0.287	2.64389	7.95973e-08	5.91808
	52	1-34675391	1	34675391	G/A	0.287	2.64389	7.95973e-08	5.91808
	53	1-34668597	1	34668597	T/C	0.295	2.65705	8.15421e-08	5.85217
	54	1-34672445	1	34672445	C/T	0.291	2.64589	8.56489e-08	5.8765
	55	1-34704576	1	34704576	C/T	0.308	2.61125	9.51191e-08	5.97552
	56	1-34677329	1	34677329	T/G	0.304	2.60249	9.61895e-08	6.0082
	57	1-34675807	1	34675807	G/A	0.3	2.58922	1.03937e-07	6.02989
	58	1-34676278	1	34676278	T/C	0.3	2.58922	1.03937e-07	6.02989
	59	1-34684709	1	34684709	G/A	0.3	2.58922	1.03937e-07	6.02989
	60	1-34685027	1	34685027	G/A	0.3	2.58922	1.03937e-07	6.02989
	61	1-34685633	1	34685633	C/G	0.3	2.58922	1.03937e-07	6.02989
	62	1-34686832	1	34686832	G/A	0.3	2.58922	1.03937e-07	6.02989
	63	1-34687767	1	34687767	G/A	0.3	2.58922	1.03937e-07	6.02989
	64	1-34690395	1	34690395	C/A	0.3	2.58922	1.03937e-07	6.02989
	65	1-34691836	1	34691836	C/G	0.3	2.58922	1.03937e-07	6.02989
	66	1-34699116	1	34699116	C/T	0.3	2.58922	1.03937e-07	6.02989
	67	1-34700392	1	34700392	G/T	0.3	2.58922	1.03937e-07	6.02989
	68	1-34700589	1	34700589	C/T	0.3	2.58922	1.03937e-07	6.02989
	69	1-34700925	1	34700925	G/A	0.3	2.58922	1.03937e-07	6.02989
	70	1-34701320	1	34701320	G/A	0.3	2.58922	1.03937e-07	6.02989
	71	1-34701333	1	34701333	G/A	0.3	2.58922	1.03937e-07	6.02989
	72	1-34701733	1	34701733	G/T	0.3	2.58922	1.03937e-07	6.02989
	73	1-34707492	1	34707492	C/T	0.3	2.58922	1.03937e-07	6.02989
	74	1-34712326	1	34712326	T/C	0.3	2.58922	1.03937e-07	6.02989
	75	1-34715023	1	34715023	A/G	0.3	2.58922	1.03937e-07	6.02989
	76	1-34716059	1	34716059	C/T	0.3	2.58922	1.03937e-07	6.02989
	77	1-34716419	1	34716419	A/T	0.3	2.58922	1.03937e-07	6.02989
	78	1-34723382	1	34723382	C/T	0.3	2.58922	1.03937e-07	6.02989
	79	1-34724753	1	34724753	C/A	0.3	2.58922	1.03937e-07	6.02989
	80	1-34724870	1	34724870	C/G	0.3	2.58922	1.03937e-07	6.02989
	81	1-34724930	1	34724930	C/T	0.3	2.58922	1.03937e-07	6.02989
	82	1-34727349	1	34727349	C/A	0.3	2.58922	1.03937e-07	6.02989
	83	1-34729192	1	34729192	G/T	0.3	2.58922	1.03937e-07	6.02989
	84	1-34625666	1	34625666	C/T	0.333	2.52969	1.12444e-07	6.26064
	85	1-34723871	1	34723871	T/C	0.327	2.54903	1.1813e-07	6.14812
	86	1-34674458	1	34674458	T/C	0.291	2.62149	1.1939e-07	5.82766
	87	1-34681551	1	34681551	A/G	0.304	2.5865	1.19835e-07	5.97516
	88	1-34676815	1	34676815	A/G	0.319	2.60711	1.21721e-07	5.87942
	89	1-34701083	1	34701083	G/A	0.304	2.58512	1.22118e-07	5.97233
	90	1-34701423	1	34701423	G/A	0.304	2.58512	1.22118e-07	5.97233
	91	1-34676735	1	34676735	T/C	0.311	2.58695	1.27216e-07	5.94529
	92	1-34660133	1	34660133	C/T	0.322	2.79058	1.28544e-07	5.14813
	93	1-34676760	1	34676760	G/A	0.315	2.59414	1.29128e-07	5.9074
	94	1-34529468	1	34529468	A/G	0.311	2.58219	1.35715e-07	5.93565
	95	1-34671225	1	34671225	G/T	0.281	2.64645	1.56969e-07	5.60193
	96	1-34689774	1	34689774	T/C	0.304	2.60507	1.66008e-07	5.74525
	97	1-34537125	1	34537125	C/G	0.288	2.6432	1.70585e-07	5.57774
	98	1-34510957	1	34510957	C/T	0.304	2.55487	1.83775e-07	5.91141
	99	1-34644902	1	34644902	T/C	0.313	2.51522	1.86119e-07	6.08167
	100	1-34647915	1	34647915	G/C	0.313	2.51522	1.86119e-07	6.08167
	101	1-34650865	1	34650865	C/T	0.313	2.51522	1.86119e-07	6.08167
	102	1-34650885	1	34650885	A/T	0.313	2.51522	1.86119e-07	6.08167
	103	1-34651038	1	34651038	C/T	0.313	2.51522	1.86119e-07	6.08167
	104	1-34652177	1	34652177	C/T	0.313	2.51522	1.86119e-07	6.08167
	105	1-34652319	1	34652319	T/A	0.313	2.51522	1.86119e-07	6.08167
	106	1-34667140	1	34667140	G/T	0.291	2.58799	1.86625e-07	5.76263
	107	1-34537225	1	34537225	A/G	0.135	5.24533	1.89854e-07	1.46465
	108	1-34537180	1	34537180	T/C	0.285	2.6303	2.12645e-07	5.53032
	109	1-34646246	1	34646246	G/T	0.318	2.50925	2.2431e-07	6.01769
	110	1-34656213	1	34656213	C/T	0.318	2.50925	2.2431e-07	6.01769
	111	1-34509028	1	34509028	C/T	0.304	2.5368	2.33596e-07	5.87596
	112	1-34655473	1	34655473	G/A	0.318	2.50583	2.348e-07	6.0108
	113	1-34655556	1	34655556	T/C	0.318	2.50583	2.348e-07	6.0108
	114	1-34676841	1	34676841	G/A	0.315	2.54539	2.47126e-07	5.81195
	115	1-34556122	1	34556122	T/A	0.304	2.53093	2.52367e-07	5.86459
	116	1-34552988	1	34552988	C/T	0.32	2.49723	2.54372e-07	6.01049
	117	1-34553004	1	34553004	T/C	0.32	2.49723	2.54372e-07	6.01049
	118	1-34539800	1	34539800	T/G	0.288	2.60871	2.65638e-07	5.51591
	119	1-34507227	1	34507227	T/C	0.318	2.495	2.71162e-07	5.98918
	120	1-34548887	1	34548887	A/G	0.318	2.495	2.71162e-07	5.98918
	121	1-34548893	1	34548893	C/T	0.318	2.495	2.71162e-07	5.98918
	122	1-34552306	1	34552306	A/T	0.318	2.495	2.71162e-07	5.98918
	123	1-34552683	1	34552683	C/T	0.318	2.48676	3.02364e-07	5.97287
	124	1-34550381	1	34550381	A/G	0.304	2.51648	3.04836e-07	5.83688
	125	1-34671088	1	34671088	C/T	0.264	2.72763	3.06346e-07	5.00963
	126	1-34550927	1	34550927	G/A	0.307	2.51126	3.13387e-07	5.84633
	127	1-34551159	1	34551159	G/T	0.307	2.51126	3.13387e-07	5.84633
	128	1-34551170	1	34551170	G/A	0.307	2.51126	3.13387e-07	5.84633
	129	1-34537091	1	34537091	A/C	0.304	2.51196	3.23243e-07	5.82831
	130	1-34537112	1	34537112	G/T	0.304	2.51196	3.23243e-07	5.82831
	131	1-34540028	1	34540028	G/A	0.304	2.51196	3.23243e-07	5.82831
	132	1-34551373	1	34551373	T/G	0.304	2.51196	3.23243e-07	5.82831
	133	1-34669526	1	34669526	G/A	0.277	2.57792	3.45311e-07	5.51974
	134	1-34545943	1	34545943	G/A	0.308	2.51398	3.47679e-07	5.78433
	135	1-34549722	1	34549722	A/G	0.295	2.54718	3.47952e-07	5.64264
	136	1-34588553	1	34588553	T/C	0.32	2.47257	3.52093e-07	5.96178
	137	1-34671194	1	34671194	G/A	0.281	2.58244	3.55809e-07	5.48776
	138	1-34657694	1	34657694	A/T	0.27	2.66521	3.61033e-07	5.1632
	139	1-34505346	1	34505346	C/T	0.307	2.49993	3.62892e-07	5.82488
	140	1-34505358	1	34505358	T/C	0.307	2.49993	3.62892e-07	5.82488
	141	1-34505413	1	34505413	A/G	0.307	2.49993	3.62892e-07	5.82488
	142	1-34579282	1	34579282	T/C	0.349	2.42924	3.6877e-07	6.13947
	143	1-34630675	1	34630675	G/T	0.336	2.45293	3.69114e-07	6.0281
	144	1-34539881	1	34539881	A/G	0.304	2.50067	3.73963e-07	5.80705
	145	1-34539909	1	34539909	T/C	0.304	2.50067	3.73963e-07	5.80705
	146	1-34505491	1	34505491	C/T	0.311	2.50484	3.76404e-07	5.78571
	147	1-34515081	1	34515081	G/A	0.32	2.46594	3.83921e-07	5.94888
	148	1-34582257	1	34582257	T/C	0.32	2.46594	3.83921e-07	5.94888
	149	1-26128676	1	26128676	A/G	0.16	4.8445	4.13439e-07	1.60197
	150	1-26128681	1	26128681	A/G	0.16	4.8445	4.13439e-07	1.60197
	151	1-26128687	1	26128687	T/C	0.16	4.8445	4.13439e-07	1.60197
	152	1-26128691	1	26128691	C/T	0.16	4.8445	4.13439e-07	1.60197
	153	1-26128693	1	26128693	A/G	0.16	4.8445	4.13439e-07	1.60197
	154	1-26128700	1	26128700	C/T	0.16	4.8445	4.13439e-07	1.60197
	155	1-34537186	1	34537186	C/G	0.16	4.8445	4.13439e-07	1.60197
	156	1-34537189	1	34537189	C/A	0.16	4.8445	4.13439e-07	1.60197
	157	1-34646853	1	34646853	C/T	0.318	2.46098	4.23248e-07	5.92279
	158	1-34659931	1	34659931	A/G	0.299	2.53838	4.27425e-07	5.58233
	159	1-34711335	1	34711335	A/G	0.291	2.52288	4.31649e-07	5.64256
	160	1-34683596	1	34683596	G/T	0.297	2.52633	4.3301e-07	5.62653
	161	1-34550395	1	34550395	A/C	0.312	2.50443	4.34568e-07	5.71796
	162	1-34550396	1	34550396	T/C	0.312	2.50443	4.34568e-07	5.71796
	163	1-34505378	1	34505378	G/T	0.304	2.48821	4.38635e-07	5.78388
	164	1-40032412	1	40032412	C/T	0.387	2.3157	4.40004e-07	6.61685
	165	1-34507654	1	34507654	A/T	0.318	2.45558	4.53762e-07	5.91248
	166	1-34552565	1	34552565	A/G	0.318	2.45558	4.53762e-07	5.91248
	167	1-34552567	1	34552567	C/G	0.318	2.45558	4.53762e-07	5.91248
	168	1-34553135	1	34553135	A/G	0.318	2.45558	4.53762e-07	5.91248
	169	1-26128655	1	26128655	T/C	0.162	4.84452	4.57406e-07	1.58774
	170	1-26128661	1	26128661	A/C	0.162	4.84452	4.57406e-07	1.58774
	171	1-26128712	1	26128712	C/T	0.162	4.84452	4.57406e-07	1.58774
	172	1-34537237	1	34537237	C/T	0.203	3.57097	4.59265e-07	2.8827
	173	1-34571866	1	34571866	C/T	0.322	2.46181	4.64123e-07	5.87313
	174	1-34549143	1	34549143	T/C	0.32	2.45108	4.65279e-07	5.92034
	175	1-34563705	1	34563705	A/C	0.331	2.42645	4.67263e-07	6.0317
	176	1-34585717	1	34585717	T/A	0.331	2.42645	4.67263e-07	6.0317
	177	1-34550862	1	34550862	G/A	0.307	2.47987	4.69201e-07	5.7875
	178	1-34635243	1	34635243	A/G	0.345	2.43911	4.71237e-07	5.96871
	179	1-34505625	1	34505625	G/A	0.313	2.44409	4.7649e-07	5.94026
	180	1-34505794	1	34505794	G/A	0.313	2.44409	4.7649e-07	5.94026
	181	1-34506347	1	34506347	G/A	0.313	2.44409	4.7649e-07	5.94026
	182	1-34506434	1	34506434	C/T	0.313	2.44409	4.7649e-07	5.94026
	183	1-34507169	1	34507169	T/C	0.313	2.44409	4.7649e-07	5.94026
	184	1-34507212	1	34507212	G/A	0.313	2.44409	4.7649e-07	5.94026
	185	1-34507403	1	34507403	G/C	0.313	2.44409	4.7649e-07	5.94026
	186	1-34508771	1	34508771	T/C	0.313	2.44409	4.7649e-07	5.94026
	187	1-34509092	1	34509092	C/T	0.313	2.44409	4.7649e-07	5.94026
	188	1-34511690	1	34511690	C/T	0.313	2.44409	4.7649e-07	5.94026
	189	1-34513005	1	34513005	A/T	0.313	2.44409	4.7649e-07	5.94026
	190	1-34513006	1	34513006	G/A	0.313	2.44409	4.7649e-07	5.94026
	191	1-34513145	1	34513145	G/A	0.313	2.44409	4.7649e-07	5.94026
	192	1-34513535	1	34513535	C/T	0.313	2.44409	4.7649e-07	5.94026
	193	1-34514417	1	34514417	G/A	0.313	2.44409	4.7649e-07	5.94026
	194	1-34514763	1	34514763	A/G	0.313	2.44409	4.7649e-07	5.94026
	195	1-34522660	1	34522660	G/C	0.313	2.44409	4.7649e-07	5.94026
	196	1-34523189	1	34523189	G/A	0.313	2.44409	4.7649e-07	5.94026
	197	1-34528394	1	34528394	T/G	0.313	2.44409	4.7649e-07	5.94026
	198	1-34528612	1	34528612	T/C	0.313	2.44409	4.7649e-07	5.94026
	199	1-34528782	1	34528782	G/A	0.313	2.44409	4.7649e-07	5.94026
	200	1-34528856	1	34528856	A/T	0.313	2.44409	4.7649e-07	5.94026
	201	1-34528858	1	34528858	A/C	0.313	2.44409	4.7649e-07	5.94026
	202	1-34528860	1	34528860	A/G	0.313	2.44409	4.7649e-07	5.94026
	203	1-34528940	1	34528940	C/A	0.313	2.44409	4.7649e-07	5.94026
	204	1-34529292	1	34529292	G/T	0.313	2.44409	4.7649e-07	5.94026
	205	1-34529305	1	34529305	G/A	0.313	2.44409	4.7649e-07	5.94026
	206	1-34529414	1	34529414	C/T	0.313	2.44409	4.7649e-07	5.94026
	207	1-34529429	1	34529429	C/T	0.313	2.44409	4.7649e-07	5.94026
	208	1-34529473	1	34529473	C/T	0.313	2.44409	4.7649e-07	5.94026
	209	1-34529489	1	34529489	G/A	0.313	2.44409	4.7649e-07	5.94026
	210	1-34529493	1	34529493	A/T	0.313	2.44409	4.7649e-07	5.94026
	211	1-34529508	1	34529508	C/T	0.313	2.44409	4.7649e-07	5.94026
	212	1-34529559	1	34529559	C/T	0.313	2.44409	4.7649e-07	5.94026
	213	1-34529636	1	34529636	T/C	0.313	2.44409	4.7649e-07	5.94026
	214	1-34529747	1	34529747	T/C	0.313	2.44409	4.7649e-07	5.94026
	215	1-34532780	1	34532780	T/C	0.313	2.44409	4.7649e-07	5.94026
	216	1-34532995	1	34532995	G/A	0.313	2.44409	4.7649e-07	5.94026
	217	1-34533014	1	34533014	C/T	0.313	2.44409	4.7649e-07	5.94026
	218	1-34533015	1	34533015	G/A	0.313	2.44409	4.7649e-07	5.94026
	219	1-34533131	1	34533131	G/A	0.313	2.44409	4.7649e-07	5.94026
	220	1-34533162	1	34533162	G/A	0.313	2.44409	4.7649e-07	5.94026
	221	1-34533246	1	34533246	G/A	0.313	2.44409	4.7649e-07	5.94026
	222	1-34533255	1	34533255	A/C	0.313	2.44409	4.7649e-07	5.94026
	223	1-34533258	1	34533258	A/T	0.313	2.44409	4.7649e-07	5.94026
	224	1-34533337	1	34533337	A/G	0.313	2.44409	4.7649e-07	5.94026
	225	1-34533363	1	34533363	G/T	0.313	2.44409	4.7649e-07	5.94026
	226	1-34533401	1	34533401	G/A	0.313	2.44409	4.7649e-07	5.94026
	227	1-34536390	1	34536390	G/T	0.313	2.44409	4.7649e-07	5.94026
	228	1-34536418	1	34536418	A/C	0.313	2.44409	4.7649e-07	5.94026
	229	1-34536470	1	34536470	C/T	0.313	2.44409	4.7649e-07	5.94026
	230	1-34536621	1	34536621	C/T	0.313	2.44409	4.7649e-07	5.94026
	231	1-34536628	1	34536628	C/T	0.313	2.44409	4.7649e-07	5.94026
	232	1-34536632	1	34536632	C/A	0.313	2.44409	4.7649e-07	5.94026
	233	1-34536634	1	34536634	C/T	0.313	2.44409	4.7649e-07	5.94026
	234	1-34536852	1	34536852	A/G	0.313	2.44409	4.7649e-07	5.94026
	235	1-34536982	1	34536982	G/A	0.313	2.44409	4.7649e-07	5.94026
	236	1-34537008	1	34537008	C/A	0.313	2.44409	4.7649e-07	5.94026
	237	1-34537020	1	34537020	T/G	0.313	2.44409	4.7649e-07	5.94026
	238	1-34537036	1	34537036	T/C	0.313	2.44409	4.7649e-07	5.94026
	239	1-34537056	1	34537056	G/A	0.313	2.44409	4.7649e-07	5.94026
	240	1-34537104	1	34537104	C/G	0.313	2.44409	4.7649e-07	5.94026
	241	1-34537106	1	34537106	A/G	0.313	2.44409	4.7649e-07	5.94026
	242	1-34537662	1	34537662	G/C	0.313	2.44409	4.7649e-07	5.94026
	243	1-34537674	1	34537674	A/G	0.313	2.44409	4.7649e-07	5.94026
	244	1-34537685	1	34537685	A/G	0.313	2.44409	4.7649e-07	5.94026
	245	1-34537703	1	34537703	C/G	0.313	2.44409	4.7649e-07	5.94026
	246	1-34537706	1	34537706	T/C	0.313	2.44409	4.7649e-07	5.94026
	247	1-34539646	1	34539646	C/T	0.313	2.44409	4.7649e-07	5.94026
	248	1-34539653	1	34539653	A/G	0.313	2.44409	4.7649e-07	5.94026
	249	1-34539658	1	34539658	G/A	0.313	2.44409	4.7649e-07	5.94026
	250	1-34539661	1	34539661	T/A	0.313	2.44409	4.7649e-07	5.94026
	251	1-34539704	1	34539704	C/G	0.313	2.44409	4.7649e-07	5.94026
	252	1-34539713	1	34539713	A/C	0.313	2.44409	4.7649e-07	5.94026
	253	1-34539714	1	34539714	T/G	0.313	2.44409	4.7649e-07	5.94026
	254	1-34539725	1	34539725	T/G	0.313	2.44409	4.7649e-07	5.94026
	255	1-34539739	1	34539739	C/A	0.313	2.44409	4.7649e-07	5.94026
	256	1-34539758	1	34539758	A/G	0.313	2.44409	4.7649e-07	5.94026
	257	1-34539762	1	34539762	G/T	0.313	2.44409	4.7649e-07	5.94026
	258	1-34539768	1	34539768	G/C	0.313	2.44409	4.7649e-07	5.94026
	259	1-34539849	1	34539849	G/A	0.313	2.44409	4.7649e-07	5.94026
	260	1-34539852	1	34539852	C/T	0.313	2.44409	4.7649e-07	5.94026
	261	1-34539863	1	34539863	C/G	0.313	2.44409	4.7649e-07	5.94026
	262	1-34539933	1	34539933	T/C	0.313	2.44409	4.7649e-07	5.94026
	263	1-34539993	1	34539993	A/G	0.313	2.44409	4.7649e-07	5.94026
	264	1-34540080	1	34540080	G/A	0.313	2.44409	4.7649e-07	5.94026
	265	1-34540081	1	34540081	A/G	0.313	2.44409	4.7649e-07	5.94026
	266	1-34540095	1	34540095	A/G	0.313	2.44409	4.7649e-07	5.94026
	267	1-34540097	1	34540097	A/G	0.313	2.44409	4.7649e-07	5.94026
	268	1-34540115	1	34540115	G/A	0.313	2.44409	4.7649e-07	5.94026
	269	1-34540154	1	34540154	G/A	0.313	2.44409	4.7649e-07	5.94026
	270	1-34542915	1	34542915	A/G	0.313	2.44409	4.7649e-07	5.94026
	271	1-34543002	1	34543002	G/A	0.313	2.44409	4.7649e-07	5.94026
	272	1-34543004	1	34543004	A/G	0.313	2.44409	4.7649e-07	5.94026
	273	1-34543015	1	34543015	C/G	0.313	2.44409	4.7649e-07	5.94026
	274	1-34543034	1	34543034	G/A	0.313	2.44409	4.7649e-07	5.94026
	275	1-34545970	1	34545970	A/G	0.313	2.44409	4.7649e-07	5.94026
	276	1-34546011	1	34546011	C/A	0.313	2.44409	4.7649e-07	5.94026
	277	1-34546017	1	34546017	A/G	0.313	2.44409	4.7649e-07	5.94026
	278	1-34546037	1	34546037	G/A	0.313	2.44409	4.7649e-07	5.94026
	279	1-34546055	1	34546055	C/A	0.313	2.44409	4.7649e-07	5.94026
	280	1-34546072	1	34546072	C/G	0.313	2.44409	4.7649e-07	5.94026
	281	1-34546161	1	34546161	A/G	0.313	2.44409	4.7649e-07	5.94026
	282	1-34546228	1	34546228	A/G	0.313	2.44409	4.7649e-07	5.94026
	283	1-34546238	1	34546238	A/T	0.313	2.44409	4.7649e-07	5.94026
	284	1-34546259	1	34546259	T/C	0.313	2.44409	4.7649e-07	5.94026
	285	1-34546274	1	34546274	G/A	0.313	2.44409	4.7649e-07	5.94026
	286	1-34546360	1	34546360	T/C	0.313	2.44409	4.7649e-07	5.94026
	287	1-34546490	1	34546490	A/T	0.313	2.44409	4.7649e-07	5.94026
	288	1-34547456	1	34547456	G/A	0.313	2.44409	4.7649e-07	5.94026
	289	1-34547575	1	34547575	G/C	0.313	2.44409	4.7649e-07	5.94026
	290	1-34548686	1	34548686	A/G	0.313	2.44409	4.7649e-07	5.94026
	291	1-34549190	1	34549190	T/C	0.313	2.44409	4.7649e-07	5.94026
	292	1-34549312	1	34549312	C/T	0.313	2.44409	4.7649e-07	5.94026
	293	1-34549441	1	34549441	A/G	0.313	2.44409	4.7649e-07	5.94026
	294	1-34549459	1	34549459	C/T	0.313	2.44409	4.7649e-07	5.94026
	295	1-34549514	1	34549514	A/G	0.313	2.44409	4.7649e-07	5.94026
	296	1-34549550	1	34549550	C/T	0.313	2.44409	4.7649e-07	5.94026
	297	1-34549586	1	34549586	A/G	0.313	2.44409	4.7649e-07	5.94026
	298	1-34549595	1	34549595	C/T	0.313	2.44409	4.7649e-07	5.94026
	299	1-34550589	1	34550589	G/A	0.313	2.44409	4.7649e-07	5.94026
	300	1-34550631	1	34550631	C/G	0.313	2.44409	4.7649e-07	5.94026
	301	1-34550640	1	34550640	G/T	0.313	2.44409	4.7649e-07	5.94026
	302	1-34550646	1	34550646	T/C	0.313	2.44409	4.7649e-07	5.94026
	303	1-34550665	1	34550665	C/T	0.313	2.44409	4.7649e-07	5.94026
	304	1-34550681	1	34550681	G/A	0.313	2.44409	4.7649e-07	5.94026
	305	1-34550896	1	34550896	T/G	0.313	2.44409	4.7649e-07	5.94026
	306	1-34552473	1	34552473	A/G	0.313	2.44409	4.7649e-07	5.94026
	307	1-34552494	1	34552494	A/G	0.313	2.44409	4.7649e-07	5.94026
	308	1-34552525	1	34552525	T/C	0.313	2.44409	4.7649e-07	5.94026
	309	1-34552584	1	34552584	T/G	0.313	2.44409	4.7649e-07	5.94026
	310	1-34552590	1	34552590	A/G	0.313	2.44409	4.7649e-07	5.94026
	311	1-34552651	1	34552651	A/G	0.313	2.44409	4.7649e-07	5.94026
	312	1-34552658	1	34552658	G/A	0.313	2.44409	4.7649e-07	5.94026
	313	1-34552659	1	34552659	G/T	0.313	2.44409	4.7649e-07	5.94026
	314	1-34552660	1	34552660	A/C	0.313	2.44409	4.7649e-07	5.94026
	315	1-34552747	1	34552747	C/A	0.313	2.44409	4.7649e-07	5.94026
	316	1-34552755	1	34552755	A/T	0.313	2.44409	4.7649e-07	5.94026
	317	1-34552769	1	34552769	G/C	0.313	2.44409	4.7649e-07	5.94026
	318	1-34552793	1	34552793	C/T	0.313	2.44409	4.7649e-07	5.94026
	319	1-34553323	1	34553323	G/T	0.313	2.44409	4.7649e-07	5.94026
	320	1-34553372	1	34553372	T/A	0.313	2.44409	4.7649e-07	5.94026
	321	1-34553944	1	34553944	G/T	0.313	2.44409	4.7649e-07	5.94026
	322	1-34555095	1	34555095	C/T	0.313	2.44409	4.7649e-07	5.94026
	323	1-34555109	1	34555109	G/A	0.313	2.44409	4.7649e-07	5.94026
	324	1-34555518	1	34555518	T/C	0.313	2.44409	4.7649e-07	5.94026
	325	1-34556147	1	34556147	A/C	0.313	2.44409	4.7649e-07	5.94026
	326	1-34556620	1	34556620	G/A	0.313	2.44409	4.7649e-07	5.94026
	327	1-34556785	1	34556785	A/G	0.313	2.44409	4.7649e-07	5.94026
	328	1-34557023	1	34557023	C/T	0.313	2.44409	4.7649e-07	5.94026
	329	1-34557144	1	34557144	C/T	0.313	2.44409	4.7649e-07	5.94026
	330	1-34559843	1	34559843	C/G	0.349	2.44645	4.82953e-07	5.92272
	331	1-34537178	1	34537178	G/A	0.146	5.04783	4.87994e-07	1.45587
	332	1-34505532	1	34505532	G/A	0.318	2.44894	4.94146e-07	5.89988
	333	1-34573698	1	34573698	T/C	0.297	2.55771	5.01467e-07	5.42864
	334	1-34558866	1	34558866	A/G	0.327	2.41242	5.04759e-07	6.05798
	335	1-34564619	1	34564619	C/T	0.327	2.41242	5.04759e-07	6.05798
	336	1-34564720	1	34564720	C/G	0.327	2.41242	5.04759e-07	6.05798
	337	1-34565190	1	34565190	A/T	0.327	2.41242	5.04759e-07	6.05798
	338	1-34566079	1	34566079	G/A	0.327	2.41242	5.04759e-07	6.05798
	339	1-34569880	1	34569880	G/A	0.327	2.41242	5.04759e-07	6.05798
	340	1-34573456	1	34573456	G/A	0.327	2.41242	5.04759e-07	6.05798
	341	1-34573854	1	34573854	C/T	0.327	2.41242	5.04759e-07	6.05798
	342	1-34574055	1	34574055	G/A	0.327	2.41242	5.04759e-07	6.05798
	343	1-34574704	1	34574704	A/G	0.327	2.41242	5.04759e-07	6.05798
	344	1-34578768	1	34578768	A/G	0.327	2.41242	5.04759e-07	6.05798
	345	1-34578830	1	34578830	G/A	0.327	2.41242	5.04759e-07	6.05798
	346	1-34579024	1	34579024	G/A	0.327	2.41242	5.04759e-07	6.05798
	347	1-34583438	1	34583438	A/G	0.327	2.41242	5.04759e-07	6.05798
	348	1-34584515	1	34584515	A/G	0.327	2.41242	5.04759e-07	6.05798
	349	1-34585031	1	34585031	G/A	0.327	2.41242	5.04759e-07	6.05798
	350	1-34505683	1	34505683	C/T	0.318	2.44632	5.10968e-07	5.89494
	351	1-34536546	1	34536546	C/A	0.318	2.44632	5.10968e-07	5.89494
	352	1-34555739	1	34555739	T/C	0.318	2.44632	5.10968e-07	5.89494
	353	1-34587444	1	34587444	G/T	0.304	2.47536	5.1628e-07	5.7603
	354	1-34546602	1	34546602	A/G	0.324	2.41266	5.1819e-07	6.04335
	355	1-34633768	1	34633768	G/A	0.347	2.39175	5.25254e-07	6.13588
	356	1-34522829	1	34522829	A/G	0.304	2.47267	5.34118e-07	5.7554
	357	1-34542887	1	34542887	G/T	0.312	2.48776	5.36134e-07	5.68792
	358	1-34639345	1	34639345	G/T	0.345	2.39104	5.42254e-07	6.12268
	359	1-34536716	1	34536716	T/G	0.318	2.44109	5.46246e-07	5.8851
	360	1-34536727	1	34536727	C/G	0.318	2.44109	5.46246e-07	5.8851
	361	1-34536728	1	34536728	T/C	0.318	2.44109	5.46246e-07	5.8851
	362	1-34536733	1	34536733	C/A	0.318	2.44109	5.46246e-07	5.8851
	363	1-34549540	1	34549540	G/T	0.318	2.44109	5.46246e-07	5.8851
	364	1-34549621	1	34549621	C/G	0.318	2.44109	5.46246e-07	5.8851
	365	1-34549637	1	34549637	C/T	0.318	2.44109	5.46246e-07	5.8851
	366	1-34543001	1	34543001	T/C	0.32	2.43781	5.5151e-07	5.89521
	367	1-34513509	1	34513509	T/C	0.318	2.43969	5.5613e-07	5.88246
	368	1-34524166	1	34524166	C/A	0.318	2.43969	5.5613e-07	5.88246
	369	1-34505834	1	34505834	T/G	0.318	2.43868	5.63292e-07	5.88058
	370	1-34596940	1	34596940	C/T	0.301	2.51275	5.63435e-07	5.55785
	371	1-34528962	1	34528962	T/A	0.295	2.5082	5.67054e-07	5.57388
	372	1-34547486	1	34547486	T/G	0.319	2.44829	5.69286e-07	5.8319
	373	1-34555189	1	34555189	C/T	0.311	2.43276	5.70379e-07	5.90123
	374	1-34511760	1	34511760	G/A	0.318	2.43768	5.70542e-07	5.8787
	375	1-34532871	1	34532871	G/A	0.318	2.43768	5.70542e-07	5.8787
	376	1-34532883	1	34532883	G/A	0.318	2.43768	5.70542e-07	5.8787
	377	1-34532898	1	34532898	C/T	0.318	2.43768	5.70542e-07	5.8787
	378	1-34532916	1	34532916	T/G	0.318	2.43768	5.70542e-07	5.8787
	379	1-34547401	1	34547401	T/A	0.318	2.43768	5.70542e-07	5.8787
	380	1-34548760	1	34548760	T/C	0.318	2.43768	5.70542e-07	5.8787
	381	1-34552440	1	34552440	C/T	0.318	2.43768	5.70542e-07	5.8787
	382	1-34533231	1	34533231	T/C	0.32	2.4337	5.81121e-07	5.8875
	383	1-34548306	1	34548306	T/C	0.308	2.47301	5.84678e-07	5.70945
	384	1-34627083	1	34627083	T/C	0.34	2.37632	5.88352e-07	6.15104
	385	1-34628239	1	34628239	G/A	0.34	2.37632	5.88352e-07	6.15104
	386	1-34629075	1	34629075	G/T	0.34	2.37632	5.88352e-07	6.15104
	387	1-34634209	1	34634209	A/C	0.34	2.37632	5.88352e-07	6.15104
	388	1-34634411	1	34634411	C/A	0.34	2.37632	5.88352e-07	6.15104
	389	1-34636657	1	34636657	G/A	0.34	2.37632	5.88352e-07	6.15104
	390	1-34639394	1	34639394	A/T	0.34	2.37632	5.88352e-07	6.15104
	391	1-34639446	1	34639446	A/G	0.34	2.37632	5.88352e-07	6.15104
	392	1-34639610	1	34639610	G/A	0.34	2.37632	5.88352e-07	6.15104
	393	1-34581587	1	34581587	A/C	0.324	2.40173	5.96686e-07	6.02209
	394	1-34539802	1	34539802	C/A	0.295	2.50347	6.01128e-07	5.56572
	395	1-34641580	1	34641580	C/T	0.327	2.39888	6.01257e-07	6.03157
	396	1-34642321	1	34642321	G/A	0.327	2.39888	6.01257e-07	6.03157
	397	1-34642546	1	34642546	C/G	0.327	2.39888	6.01257e-07	6.03157
	398	1-34559926	1	34559926	G/T	0.331	2.40614	6.07222e-07	5.99234
	399	1-34573215	1	34573215	C/T	0.331	2.40614	6.07222e-07	5.99234
	400	1-34589308	1	34589308	G/A	0.313	2.41954	6.51876e-07	5.89388
	401	1-34596911	1	34596911	G/T	0.313	2.41954	6.51876e-07	5.89388
	402	1-34536967	1	34536967	C/T	0.304	2.45641	6.54827e-07	5.7261
	403	1-34536968	1	34536968	C/T	0.304	2.45641	6.54827e-07	5.7261
	404	1-34573053	1	34573053	C/T	0.34	2.36787	6.56405e-07	6.13426
	405	1-34507580	1	34507580	G/A	0.322	2.43141	6.82308e-07	5.81675
	406	1-34634769	1	34634769	G/A	0.338	2.36627	6.86311e-07	6.11845
	407	1-34547374	1	34547374	T/C	0.322	2.42957	6.9829e-07	5.81338
	408	1-34550456	1	34550456	C/G	0.318	2.42098	7.04534e-07	5.84775
	409	1-34582710	1	34582710	A/G	0.336	2.4021	7.10486e-07	5.93021
	410	1-34506579	1	34506579	T/C	0.318	2.41897	7.22545e-07	5.84406
	411	1-34536600	1	34536600	C/T	0.318	2.41897	7.22545e-07	5.84406
	412	1-34514637	1	34514637	A/T	0.318	2.41877	7.2437e-07	5.8437
	413	1-34536661	1	34536661	C/A	0.318	2.41877	7.2437e-07	5.8437
	414	1-34536667	1	34536667	A/T	0.318	2.41877	7.2437e-07	5.8437
	415	1-34549036	1	34549036	G/T	0.308	2.45569	7.25045e-07	5.67874
	416	1-34645230	1	34645230	A/G	0.304	2.44799	7.26988e-07	5.71112
	417	1-34646550	1	34646550	T/C	0.304	2.44799	7.26988e-07	5.71112
	418	1-34660131	1	34660131	C/T	0.26	2.71181	7.28562e-07	4.70281
	419	1-34599670	1	34599670	G/A	0.308	2.45455	7.35321e-07	5.67674
	420	1-34714043	1	34714043	G/A	0.295	2.487	7.35449e-07	5.53762
	421	1-34552121	1	34552121	A/C	0.322	2.42341	7.54144e-07	5.8022
	422	1-34536675	1	34536675	T/C	0.311	2.44841	7.65273e-07	5.68373
	423	1-34631804	1	34631804	T/A	0.345	2.3588	8.20916e-07	6.05965
	424	1-34567715	1	34567715	A/C	0.329	2.38445	8.21697e-07	5.9372
	425	1-34536701	1	34536701	T/A	0.322	2.4152	8.35194e-07	5.7874
	426	1-34536703	1	34536703	G/T	0.322	2.4152	8.35194e-07	5.7874
	427	1-34542835	1	34542835	G/A	0.308	2.44397	8.37487e-07	5.65826
	428	1-34501943	1	34501943	C/T	0.299	2.48299	8.43953e-07	5.48778
	429	1-34536935	1	34536935	C/A	0.318	2.40408	8.69989e-07	5.81698
	430	1-34539790	1	34539790	A/G	0.304	2.43292	8.75323e-07	5.68462
	431	1-34539791	1	34539791	C/T	0.304	2.43292	8.75323e-07	5.68462
	432	1-34548697	1	34548697	C/T	0.304	2.43292	8.75323e-07	5.68462
	433	1-34555931	1	34555931	A/T	0.304	2.43292	8.75323e-07	5.68462
	434	1-34539949	1	34539949	C/T	0.307	2.39082	8.83169e-07	5.8701
	435	1-34350295	1	34350295	T/A	0.418	2.28176	8.83683e-07	6.4075
	436	1-34578479	1	34578479	A/C	0.338	2.38264	8.85102e-07	5.90697
	437	1-34546618	1	34546618	A/G	0.315	2.40056	9.3811e-07	5.79434
	438	1-34600682	1	34600682	G/A	0.32	2.39546	9.38658e-07	5.81732
	439	1-34600683	1	34600683	C/A	0.32	2.39546	9.38658e-07	5.81732
	440	1-34500505	1	34500505	C/T	0.322	2.40489	9.48631e-07	5.76899
	441	1-34549645	1	34549645	A/G	0.307	2.42322	9.50346e-07	5.68608
	442	1-34636095	1	34636095	G/A	0.336	2.37436	1.00566e-06	5.87895
	443	1-34504501	1	34504501	T/A	0.32	2.38977	1.00694e-06	5.80711
	444	1-34353779	1	34353779	G/A	0.42	2.23708	1.03463e-06	6.55726
	445	1-34546628	1	34546628	C/A	0.308	2.42308	1.07957e-06	5.62239
	446	1-34548246	1	34548246	A/G	0.318	2.38618	1.08489e-06	5.78496
	447	1-34553962	1	34553962	G/A	0.318	2.38618	1.08489e-06	5.78496
	448	1-34537704	1	34537704	C/T	0.307	2.40962	1.1211e-06	5.66261
	449	1-34623613	1	34623613	T/A	0.318	2.383	1.128e-06	5.77933
	450	1-34626859	1	34626859	G/T	0.353	2.33878	1.13109e-06	5.98525
	451	1-34548606	1	34548606	A/G	0.318	2.38075	1.15939e-06	5.77536
	452	1-34548657	1	34548657	C/T	0.318	2.38075	1.15939e-06	5.77536
	453	1-34536562	1	34536562	C/T	0.322	2.38729	1.17653e-06	5.73801
	454	1-34549643	1	34549643	T/C	0.307	2.40542	1.17956e-06	5.65541
	455	1-34578714	1	34578714	C/T	0.32	2.37586	1.19408e-06	5.78242
	456	1-34610136	1	34610136	G/A	0.331	2.34858	1.24995e-06	5.88526
	457	1-34495019	1	34495019	C/T	0.324	2.37466	1.33214e-06	5.73097
	458	1-34495758	1	34495758	T/C	0.327	2.32933	1.4381e-06	5.90168
	459	1-34497940	1	34497940	C/T	0.327	2.32933	1.4381e-06	5.90168
	460	1-34497945	1	34497945	C/T	0.327	2.32933	1.4381e-06	5.90168
	461	1-34500773	1	34500773	G/A	0.327	2.32933	1.4381e-06	5.90168
	462	1-34500788	1	34500788	A/G	0.327	2.32933	1.4381e-06	5.90168
	463	1-34501418	1	34501418	G/A	0.327	2.32933	1.4381e-06	5.90168
	464	1-34503212	1	34503212	T/C	0.327	2.32933	1.4381e-06	5.90168
	465	1-34503382	1	34503382	G/A	0.327	2.32933	1.4381e-06	5.90168
	466	1-34503440	1	34503440	C/A	0.327	2.32933	1.4381e-06	5.90168
	467	1-34504751	1	34504751	C/G	0.327	2.32933	1.4381e-06	5.90168
	468	1-34504872	1	34504872	T/G	0.327	2.32933	1.4381e-06	5.90168
	469	1-34539623	1	34539623	A/G	0.292	2.43392	1.44558e-06	5.42976
	470	1-34611341	1	34611341	G/A	0.322	2.36809	1.48331e-06	5.70486
	471	1-34630900	1	34630900	C/T	0.345	2.31129	1.48659e-06	5.97057
	472	1-34503975	1	34503975	G/A	0.331	2.33418	1.49055e-06	5.85945
	473	1-34504011	1	34504011	G/A	0.331	2.33418	1.49055e-06	5.85945
	474	1-34596842	1	34596842	T/C	0.318	2.35604	1.56328e-06	5.73238
	475	1-21335521	1	21335521	C/T	0.073	5.83516	1.64116e-06	0.97704
	476	1-34377354	1	34377354	G/C	0.372	2.26063	1.80379e-06	6.11506
	477	1-34597464	1	34597464	G/C	0.327	2.30532	1.92383e-06	5.85899
	478	1-34598363	1	34598363	A/T	0.327	2.30532	1.92383e-06	5.85899
	479	1-34598468	1	34598468	A/C	0.327	2.30532	1.92383e-06	5.85899
	480	1-34598876	1	34598876	G/A	0.327	2.30532	1.92383e-06	5.85899
	481	1-34599366	1	34599366	C/T	0.327	2.30532	1.92383e-06	5.85899
	482	1-34599395	1	34599395	C/T	0.327	2.30532	1.92383e-06	5.85899
	483	1-34599434	1	34599434	G/A	0.327	2.30532	1.92383e-06	5.85899
	484	1-34599561	1	34599561	G/A	0.327	2.30532	1.92383e-06	5.85899
	485	1-34599627	1	34599627	G/A	0.327	2.30532	1.92383e-06	5.85899
	486	1-34599858	1	34599858	T/C	0.327	2.30532	1.92383e-06	5.85899
	487	1-34599874	1	34599874	C/G	0.327	2.30532	1.92383e-06	5.85899
	488	1-34599972	1	34599972	C/T	0.327	2.30532	1.92383e-06	5.85899
	489	1-34600434	1	34600434	G/A	0.327	2.30532	1.92383e-06	5.85899
	490	1-34600613	1	34600613	T/C	0.327	2.30532	1.92383e-06	5.85899
	491	1-34600632	1	34600632	A/G	0.327	2.30532	1.92383e-06	5.85899
	492	1-34602168	1	34602168	C/T	0.327	2.30532	1.92383e-06	5.85899
	493	1-34602705	1	34602705	T/G	0.327	2.30532	1.92383e-06	5.85899
	494	1-34602708	1	34602708	G/A	0.327	2.30532	1.92383e-06	5.85899
	495	1-34602768	1	34602768	G/A	0.327	2.30532	1.92383e-06	5.85899
	496	1-34603185	1	34603185	A/G	0.327	2.30532	1.92383e-06	5.85899
	497	1-34604471	1	34604471	G/A	0.327	2.30532	1.92383e-06	5.85899
	498	1-34606937	1	34606937	C/A	0.327	2.30532	1.92383e-06	5.85899
	499	1-34608259	1	34608259	T/C	0.327	2.30532	1.92383e-06	5.85899
	500	1-34609472	1	34609472	C/T	0.327	2.30532	1.92383e-06	5.85899
	501	1-34609476	1	34609476	C/T	0.327	2.30532	1.92383e-06	5.85899
	502	1-34610066	1	34610066	C/T	0.327	2.30532	1.92383e-06	5.85899
	503	1-34610406	1	34610406	C/T	0.327	2.30532	1.92383e-06	5.85899
	504	1-34610788	1	34610788	G/A	0.327	2.30532	1.92383e-06	5.85899
	505	1-34610997	1	34610997	G/A	0.327	2.30532	1.92383e-06	5.85899
	506	1-34611512	1	34611512	G/A	0.327	2.30532	1.92383e-06	5.85899
	507	1-34611524	1	34611524	C/G	0.327	2.30532	1.92383e-06	5.85899
	508	1-34611704	1	34611704	C/A	0.327	2.30532	1.92383e-06	5.85899
	509	1-34611792	1	34611792	C/A	0.327	2.30532	1.92383e-06	5.85899
	510	1-34611848	1	34611848	G/T	0.327	2.30532	1.92383e-06	5.85899
	511	1-34611915	1	34611915	C/T	0.327	2.30532	1.92383e-06	5.85899
	512	1-34612074	1	34612074	G/A	0.327	2.30532	1.92383e-06	5.85899
	513	1-34612082	1	34612082	A/G	0.327	2.30532	1.92383e-06	5.85899
	514	1-34612483	1	34612483	C/G	0.327	2.30532	1.92383e-06	5.85899
	515	1-34612629	1	34612629	C/A	0.327	2.30532	1.92383e-06	5.85899
	516	1-34612635	1	34612635	G/A	0.327	2.30532	1.92383e-06	5.85899
	517	1-34613258	1	34613258	C/T	0.327	2.30532	1.92383e-06	5.85899
	518	1-34614714	1	34614714	A/C	0.327	2.30532	1.92383e-06	5.85899
	519	1-34614768	1	34614768	C/T	0.327	2.30532	1.92383e-06	5.85899
	520	1-34619839	1	34619839	C/G	0.327	2.30532	1.92383e-06	5.85899
	521	1-34620144	1	34620144	A/G	0.327	2.30532	1.92383e-06	5.85899
	522	1-34623402	1	34623402	G/A	0.327	2.30532	1.92383e-06	5.85899
	523	1-34625177	1	34625177	T/C	0.327	2.30532	1.92383e-06	5.85899
	524	1-34638918	1	34638918	G/A	0.333	2.31041	1.93806e-06	5.83075
	525	1-34602626	1	34602626	G/A	0.331	2.31145	1.96073e-06	5.8195
	526	1-34721535	1	34721535	G/A	0.144	4.80058	1.97363e-06	1.41141
	527	1-34617969	1	34617969	A/G	0.331	2.31001	1.99469e-06	5.81701
	528	1-34600801	1	34600801	G/T	0.318	2.37136	2.04404e-06	5.52373
	529	1-34600286	1	34600286	G/C	0.331	2.30735	2.05924e-06	5.81239
	530	1-34503469	1	34503469	C/T	0.372	2.24572	2.06935e-06	6.11323
	531	1-34366378	1	34366378	C/T	0.367	2.23939	2.14072e-06	6.1263
	532	1-34389518	1	34389518	C/T	0.367	2.23939	2.14072e-06	6.1263
	533	1-34396152	1	34396152	G/T	0.367	2.23939	2.14072e-06	6.1263
	534	1-34396377	1	34396377	G/A	0.367	2.23939	2.14072e-06	6.1263
	535	1-34617633	1	34617633	C/T	0.331	2.30406	2.14137e-06	5.80672
	536	1-34503339	1	34503339	G/A	0.331	2.30341	2.15819e-06	5.80559
	537	1-34619959	1	34619959	G/A	0.347	2.31299	2.19234e-06	5.75185
	538	1-34609753	1	34609753	C/G	0.331	2.30201	2.19427e-06	5.80319
	539	1-34383491	1	34383491	A/G	0.353	2.25152	2.31159e-06	6.02099
	540	1-34611426	1	34611426	G/T	0.333	2.29278	2.39077e-06	5.8003
	541	1-34355283	1	34355283	C/T	0.4	2.23464	2.42686e-06	6.07882
	542	1-34501168	1	34501168	A/C	0.311	2.3486	2.51131e-06	5.51715
	543	1-34611549	1	34611549	C/T	0.333	2.2869	2.56258e-06	5.79027
	544	1-34504158	1	34504158	A/G	0.331	2.28843	2.57664e-06	5.77998
	545	1-34504168	1	34504168	A/G	0.331	2.28843	2.57664e-06	5.77998
	546	1-34504223	1	34504223	G/T	0.331	2.28843	2.57664e-06	5.77998
	547	1-34572218	1	34572218	G/A	0.308	2.34773	2.61877e-06	5.49906
	548	1-34600525	1	34600525	G/T	0.331	2.28704	2.61924e-06	5.77762
	549	1-34600569	1	34600569	C/G	0.331	2.28704	2.61924e-06	5.77762
	550	1-34597821	1	34597821	G/A	0.32	2.30664	2.72173e-06	5.66463
	551	1-34506482	1	34506482	G/A	0.4	2.40924	2.72521e-06	5.21645
	552	1-36067351	1	36067351	G/A	0.373	2.21996	2.79278e-06	6.07327
	553	1-34550484	1	34550484	T/G	0.304	2.33491	2.79465e-06	5.52187
	554	1-34604158	1	34604158	T/A	0.331	2.27945	2.86308e-06	5.76481
	555	1-34539872	1	34539872	T/A	0.295	2.36963	2.90338e-06	5.35022
	556	1-34539875	1	34539875	A/G	0.295	2.36963	2.90338e-06	5.35022
	557	1-34600823	1	34600823	G/A	0.307	2.35977	3.16086e-06	5.34863
	558	1-34548745	1	34548745	A/G	0.308	2.32849	3.25985e-06	5.46903
	559	1-34548779	1	34548779	A/T	0.308	2.32849	3.25985e-06	5.46903
	560	1-34533749	1	34533749	A/G	0.297	2.35187	3.41344e-06	5.34267
	561	1-34533759	1	34533759	T/G	0.297	2.35187	3.41344e-06	5.34267
	562	1-34597270	1	34597270	C/G	0.331	2.26426	3.41609e-06	5.73948
	563	1-34536370	1	34536370	T/C	0.304	2.31639	3.44971e-06	5.49288
	564	1-34603651	1	34603651	G/A	0.354	2.26517	3.47349e-06	5.72591
	565	1-34554462	1	34554462	C/T	0.307	2.31251	3.49041e-06	5.50402
	566	1-30062548	1	30062548	T/C	0.392	2.16212	3.58251e-06	6.23117
	567	1-35897987	1	35897987	C/T	0.4	2.13688	3.72512e-06	6.34577
	568	1-34500283	1	34500283	T/C	0.301	2.34838	3.83685e-06	5.29685
	569	1-30072553	1	30072553	A/T	0.384	2.17935	3.85315e-06	6.09578
	570	1-34550490	1	34550490	G/C	0.295	2.34267	3.91945e-06	5.31018
	571	1-34619166	1	34619166	G/A	0.324	2.24463	4.02462e-06	5.74202
	572	1-34612156	1	34612156	G/A	0.331	2.24929	4.05867e-06	5.71488
	573	1-34513475	1	34513475	A/T	0.287	2.32374	4.17899e-06	5.35846
	574	1-34533664	1	34533664	C/A	0.288	2.37364	4.17917e-06	5.14697
	575	1-34533673	1	34533673	T/C	0.288	2.37364	4.17917e-06	5.14697
	576	1-34533675	1	34533675	G/A	0.288	2.37364	4.17917e-06	5.14697
	577	1-34536566	1	34536566	T/C	0.315	2.30906	4.26975e-06	5.41158
	578	1-16553283	1	16553283	T/G	0.051	6.83194	4.27693e-06	0.649181
	579	1-34600277	1	34600277	C/A	0.295	2.41559	4.34877e-06	4.95896
	580	1-34578115	1	34578115	G/T	0.311	2.2984	4.42867e-06	5.43946
	581	1-34533596	1	34533596	G/A	0.295	2.32991	4.5095e-06	5.29158
	582	1-34600988	1	34600988	G/A	0.308	2.2969	4.64048e-06	5.42097
	583	1-34533734	1	34533734	C/G	0.288	2.36132	4.77209e-06	5.12988
	584	1-28716032	1	28716032	G/A	0.25	3.78489	4.80284e-06	2.05992
	585	1-34357632	1	34357632	T/A	0.42	2.27462	5.01948e-06	5.47878
	586	1-34548525	1	34548525	G/A	0.285	2.35964	5.05703e-06	5.10707
	587	1-7627316	1	7627316	G/A	0.08	5.5216	5.06143e-06	0.973224
	588	1-30072052	1	30072052	C/T	0.387	2.15157	5.24045e-06	6.05813
	589	1-34561485	1	34561485	G/A	0.178	4.13078	5.30964e-06	1.71711
	590	1-34670949	1	34670949	G/A	0.233	2.73521	5.42665e-06	3.82354
	591	1-30062094	1	30062094	C/T	0.397	2.13602	5.46923e-06	6.11508
	592	1-34406089	1	34406089	G/A	0.324	2.413	5.68958e-06	4.83664
	593	1-30061496	1	30061496	G/A	0.387	2.11273	5.7848e-06	6.20725
	594	1-30061775	1	30061775	C/A	0.387	2.11273	5.7848e-06	6.20725
	595	1-30062113	1	30062113	A/T	0.387	2.11273	5.7848e-06	6.20725
	596	1-30062994	1	30062994	C/T	0.387	2.11273	5.7848e-06	6.20725
	597	1-30063753	1	30063753	G/T	0.387	2.11273	5.7848e-06	6.20725
	598	1-30064440	1	30064440	C/T	0.387	2.11273	5.7848e-06	6.20725
	599	1-30066200	1	30066200	C/T	0.387	2.11273	5.7848e-06	6.20725
	600	1-30067853	1	30067853	G/A	0.387	2.11273	5.7848e-06	6.20725
	601	1-30068207	1	30068207	C/T	0.387	2.11273	5.7848e-06	6.20725
	602	1-30070424	1	30070424	C/T	0.387	2.11273	5.7848e-06	6.20725
	603	1-30070588	1	30070588	C/T	0.387	2.11273	5.7848e-06	6.20725
	604	1-30071661	1	30071661	C/A	0.387	2.11273	5.7848e-06	6.20725
	605	1-30071700	1	30071700	C/T	0.387	2.11273	5.7848e-06	6.20725
	606	1-30071793	1	30071793	T/C	0.387	2.11273	5.7848e-06	6.20725
	607	1-30072202	1	30072202	A/T	0.387	2.11273	5.7848e-06	6.20725
	608	1-30073192	1	30073192	G/A	0.387	2.11273	5.7848e-06	6.20725
	609	1-30073335	1	30073335	C/T	0.387	2.11273	5.7848e-06	6.20725
	610	1-34548527	1	34548527	A/T	0.295	2.29255	6.7503e-06	5.23846
	611	1-29984964	1	29984964	A/G	0.223	3.74544	7.02248e-06	2.02058
	612	1-29984969	1	29984969	G/A	0.223	3.74544	7.02248e-06	2.02058
	613	1-34605200	1	34605200	G/T	0.315	2.263	7.06154e-06	5.34399
	614	1-34494442	1	34494442	A/G	0.329	2.23552	7.17826e-06	5.45973
	615	1-34550497	1	34550497	G/T	0.285	2.3249	7.29543e-06	5.0604
	616	1-34619978	1	34619978	T/C	0.345	2.27068	7.42613e-06	5.28235
	617	1-34554479	1	34554479	C/T	0.3	2.27419	7.67544e-06	5.24893
	618	1-34615717	1	34615717	A/G	0.324	2.21845	7.95703e-06	5.48089
	619	1-15869327	1	15869327	C/A	0.233	4.06514	8.24543e-06	1.69112
	620	1-34542238	1	34542238	A/C	0.285	2.312	8.34131e-06	5.04346
	621	1-34542239	1	34542239	A/G	0.285	2.312	8.34131e-06	5.04346
	622	1-30050152	1	30050152	A/G	0.42	2.22598	8.52784e-06	5.40681
	623	1-34556784	1	34556784	G/A	0.34	2.21435	8.83881e-06	5.44026
	624	1-34503268	1	34503268	G/A	0.318	2.20237	8.9703e-06	5.48786
	625	1-30062141	1	30062141	T/C	0.397	2.09216	9.06081e-06	6.03908
	626	1-29986464	1	29986464	G/A	0.34	2.34015	9.51595e-06	4.86094
	627	1-30070875	1	30070875	C/T	0.378	2.09024	9.73443e-06	6.00437
	628	1-30070923	1	30070923	C/T	0.378	2.09024	9.73443e-06	6.00437
	629	1-34533571	1	34533571	C/A	0.285	2.29612	9.82121e-06	5.02289
	630	2-11557769	2	11557769	T/G	0.18	4.7312	3.53137e-07	1.70161
	631	2-17138809	2	17138809	T/C	0.193	4.64826	3.91882e-07	1.74587
	632	2-6504907	2	6504907	G/A	0.171	4.65117	1.27304e-06	1.56666
	633	2-15795021	2	15795021	T/C	0.153	4.71517	1.32981e-06	1.51878
	634	2-15795055	2	15795055	A/G	0.153	4.71517	1.32981e-06	1.51878
	635	2-11557776	2	11557776	A/G	0.227	4.2908	2.18475e-06	1.74309
	636	2-27221816	2	27221816	C/A	0.213	4.28686	2.67103e-06	1.712
	637	2-15794990	2	15794990	G/A	0.147	4.65568	2.6903e-06	1.45425
	638	2-15795005	2	15795005	G/A	0.147	4.65568	2.6903e-06	1.45425
	639	2-19768847	2	19768847	C/A	0.1	5.43281	2.74808e-06	1.06983
	640	2-17598725	2	17598725	A/T	0.207	4.27229	3.2848e-06	1.68821
	641	2-6393645	2	6393645	T/G	0.16	4.59076	3.56496e-06	1.45333
	642	2-6393660	2	6393660	T/A	0.16	4.59076	3.56496e-06	1.45333
	643	2-14710337	2	14710337	T/C	0.1	5.84376	4.13143e-06	0.888363
	644	2-17598710	2	17598710	G/C	0.213	4.19421	4.7237e-06	1.68682
	645	2-17598715	2	17598715	T/A	0.213	4.19421	4.7237e-06	1.68682
	646	2-29632319	2	29632319	T/C	0.287	4.14407	6.37787e-06	1.67372
	647	2-14324294	2	14324294	G/A	0.067	5.50115	7.60237e-06	0.938841
	648	2-8343738	2	8343738	C/T	0.38	2.10882	7.80806e-06	6.042
	649	2-8343791	2	8343791	C/T	0.38	2.10882	7.80806e-06	6.042
	650	2-8352401	2	8352401	G/A	0.38	2.10882	7.80806e-06	6.042
	651	2-8360625	2	8360625	A/G	0.38	2.10882	7.80806e-06	6.042
	652	2-11433645	2	11433645	A/G	0.053	6.12109	7.96279e-06	0.755862
	653	2-15794979	2	15794979	A/T	0.155	4.4014	8.7034e-06	1.43772
	654	2-14710338	2	14710338	G/A	0.107	5.56258	8.78122e-06	0.904112
	655	3-1365645	3	1365645	G/A	0.05	6.62212	3.01765e-06	0.715804
	656	4-16091307	4	16091307	G/A	0.253	3.73212	2.61191e-06	2.25145
	657	4-15906025	4	15906025	A/G	0.135	5.0641	3.18699e-06	1.21113
	658	4-21043263	4	21043263	T/C	0.089	5.10597	4.07686e-06	1.16204
	659	4-30345657	4	30345657	G/A	0.146	4.12789	7.24528e-06	1.66391
	660	4-15906005	4	15906005	A/G	0.135	4.85483	7.66532e-06	1.20118
	661	4-21043270	4	21043270	C/T	0.089	4.97886	9.63962e-06	1.11455
	662	5-2503789	5	2503789	G/A	0.115	5.61672	1.32305e-07	1.3189
	663	5-11240238	5	11240238	T/C	0.24	4.56269	3.12596e-07	1.84668
	664	5-2503786	5	2503786	G/A	0.108	5.56793	3.13866e-07	1.2472
	665	5-6830712	5	6830712	C/T	0.05	9.94138	9.86236e-07	0.355684
	666	5-6830714	5	6830714	G/A	0.05	9.94138	9.86236e-07	0.355684
	667	5-6830717	5	6830717	G/A	0.05	9.94138	9.86236e-07	0.355684
	668	5-2503792	5	2503792	A/G	0.108	5.35682	1.08491e-06	1.20368
	669	5-12321922	5	12321922	A/T	0.06	6.1304	3.46745e-06	0.822559
	670	5-6830758	5	6830758	A/G	0.051	8.60427	4.10137e-06	0.41206
	671	5-6830759	5	6830759	G/A	0.051	8.60427	4.10137e-06	0.41206
	672	5-2503813	5	2503813	C/T	0.101	5.13981	5.611e-06	1.10941
	673	5-19193663	5	19193663	C/T	0.12	5.87171	5.69612e-06	0.850932
	674	5-1078217	5	1078217	T/A	0.363	2.15497	8.1048e-06	5.77854
	675	5-1673893	5	1673893	G/A	0.187	4.16637	9.58446e-06	1.58507
	676	5-1673895	5	1673895	G/A	0.187	4.16637	9.58446e-06	1.58507
	677	6-27326033	6	27326033	T/A	0.155	4.83269	7.0211e-07	1.53526
	678	6-27326053	6	27326053	C/T	0.162	4.77212	7.28915e-07	1.5685
	679	6-20774400	6	20774400	C/A	0.053	6.85967	1.11519e-06	0.735591
	680	6-20774349	6	20774349	C/T	0.053	6.85129	1.30003e-06	0.726724
	681	6-15585711	6	15585711	A/G	0.23	4.30276	2.36137e-06	1.72041
	682	6-25569148	6	25569148	T/C	0.054	6.43466	2.72639e-06	0.765586
	683	6-15585723	6	15585723	C/G	0.236	4.24819	3.1643e-06	1.71353
	684	6-19821208	6	19821208	A/G	0.1	5.43612	3.56635e-06	1.04076
	685	6-19821216	6	19821216	T/G	0.093	5.55495	4.40247e-06	0.975774
	686	6-27326022	6	27326022	C/T	0.149	4.54373	5.43467e-06	1.41996
	687	6-22689112	6	22689112	A/T	0.051	5.6003	5.71389e-06	0.934312
	688	6-1166103	6	1166103	C/G	0.055	10.9953	5.89996e-06	0.243237
	689	6-19821220	6	19821220	G/T	0.113	5.19522	8.96897e-06	1.03273
	690	7-26113429	7	26113429	A/G	0.378	2.98103	3.40849e-07	4.19074
	691	7-26232344	7	26232344	T/C	0.493	-2.24508	5.0999e-07	6.92382
	692	7-26099029	7	26099029	T/C	0.446	-2.29045	6.35333e-07	6.54677
	693	7-26093655	7	26093655	A/G	0.425	-2.28113	6.73126e-07	6.5642
	694	7-26091991	7	26091991	G/C	0.44	-2.26315	8.40764e-07	6.5348
	695	7-26095370	7	26095370	T/G	0.44	-2.26315	8.40764e-07	6.5348
	696	7-26095456	7	26095456	A/G	0.44	-2.26315	8.40764e-07	6.5348
	697	7-26095919	7	26095919	T/C	0.44	-2.26315	8.40764e-07	6.5348
	698	7-26099337	7	26099337	T/C	0.44	-2.26315	8.40764e-07	6.5348
	699	7-26092079	7	26092079	C/A	0.44	-2.29405	1.01109e-06	6.26851
	700	7-26091886	7	26091886	T/C	0.432	-2.26271	1.34202e-06	6.27144
	701	7-26714879	7	26714879	A/G	0.48	-2.1953	1.52038e-06	6.56218
	702	7-26624159	7	26624159	C/T	0.453	-2.16468	1.70536e-06	6.6666
	703	7-26097119	7	26097119	A/G	0.42	-2.19632	1.75211e-06	6.47218
	704	7-26095931	7	26095931	A/G	0.413	-2.18294	1.82734e-06	6.52134
	705	7-26218255	7	26218255	G/A	0.452	-2.169	2.35932e-06	6.44538
	706	7-26106766	7	26106766	T/C	0.459	-2.14734	2.95533e-06	6.42936
	707	7-26100608	7	26100608	C/T	0.453	-2.12336	4.02115e-06	6.37418
	708	7-26101402	7	26101402	A/G	0.453	-2.12336	4.02115e-06	6.37418
	709	7-26107583	7	26107583	C/T	0.453	-2.12336	4.02115e-06	6.37418
	710	7-26109972	7	26109972	A/G	0.453	-2.12336	4.02115e-06	6.37418
	711	7-26125167	7	26125167	T/C	0.453	-2.12336	4.02115e-06	6.37418
	712	7-26127407	7	26127407	T/C	0.446	-2.10038	4.74231e-06	6.40104
	713	7-5078815	7	5078815	G/A	0.227	4.58878	4.80467e-06	1.41063
	714	7-26092398	7	26092398	G/T	0.425	-2.17727	4.93995e-06	5.95932
	715	7-26087918	7	26087918	T/C	0.467	-2.05041	9.44892e-06	6.24463
	716	7-26396706	7	26396706	T/A	0.473	-2.06152	9.4501e-06	6.18156
	717	7-26722914	7	26722914	A/G	0.487	2.02684	9.8889e-06	6.3512
	718	8-3403174	8	3403174	G/A	0.146	5.28817	1.02499e-07	1.51673
	719	8-28285666	8	28285666	G/A	0.147	5.14454	1.24423e-07	1.57609
	720	8-28285633	8	28285633	G/C	0.149	5.13184	1.49685e-07	1.5598
	721	8-10991904	8	10991904	C/T	0.147	4.88081	6.97763e-07	1.50644
	722	8-1987599	8	1987599	G/A	0.432	2.25046	7.70772e-07	6.65397
	723	8-12423948	8	12423948	C/T	0.358	2.33685	8.30912e-07	6.16047
	724	8-3453600	8	3453600	G/A	0.219	4.44327	1.31449e-06	1.70895
	725	8-13047342	8	13047342	T/C	0.493	2.29285	2.38695e-06	5.80081
	726	8-18016018	8	18016018	G/A	0.393	-2.21037	3.00522e-06	6.0802
	727	8-18034521	8	18034521	C/T	0.26	-3.30501	4.78412e-06	2.68539
	728	8-13021202	8	13021202	G/A	0.46	2.11821	5.07892e-06	6.2579
	729	8-14362911	8	14362911	A/G	0.377	2.21235	5.07974e-06	5.76661
	730	8-12775503	8	12775503	C/T	0.142	4.44584	5.21179e-06	1.48875
	731	8-12775509	8	12775509	A/G	0.142	4.44584	5.21179e-06	1.48875
	732	8-5910314	8	5910314	C/T	0.185	4.32751	5.55229e-06	1.55962
	733	8-12374610	8	12374610	T/C	0.473	2.10201	5.87335e-06	6.25722
	734	8-24745317	8	24745317	C/T	0.205	4.2354	5.91633e-06	1.61625
	735	8-13800275	8	13800275	A/T	0.103	5.50499	6.25756e-06	0.957348
	736	8-12848726	8	12848726	T/C	0.467	2.08191	6.40609e-06	6.31551
	737	8-13052914	8	13052914	T/C	0.467	2.08191	6.40609e-06	6.31551
	738	8-13734433	8	13734433	T/C	0.467	2.08191	6.40609e-06	6.31551
	739	8-13770172	8	13770172	T/C	0.48	2.10309	6.78133e-06	6.16111
	740	8-14032170	8	14032170	A/G	0.473	2.08919	6.8271e-06	6.23398
	741	8-3453643	8	3453643	G/A	0.212	4.18985	6.88758e-06	1.62461
	742	8-3453567	8	3453567	G/A	0.24	3.9317	7.03628e-06	1.83672
	743	8-15834078	8	15834078	G/A	0.326	2.92694	7.43188e-06	3.24718
	744	8-14259180	8	14259180	A/G	0.473	2.08156	7.4653e-06	6.21998
	745	8-6146900	8	6146900	G/A	0.056	7.58007	7.83303e-06	0.495079
	746	8-10991885	8	10991885	A/G	0.153	4.40664	7.8738e-06	1.45001
	747	8-2047999	8	2047999	T/A	0.5	2.06966	8.26481e-06	6.22189
	748	8-4720941	8	4720941	C/T	0.387	2.49948	9.4864e-06	4.28811
	749	9-1926668	9	1926668	C/T	0.433	2.33686	9.03126e-07	6.11549
	750	9-2059029	9	2059029	C/T	0.363	2.75235	1.44927e-06	4.2959
	751	9-1886398	9	1886398	C/T	0.4	2.3496	3.37929e-06	5.35771
	752	9-1886473	9	1886473	G/A	0.4	2.3496	3.37929e-06	5.35771
	753	9-12799364	9	12799364	C/T	0.22	4.21432	3.8081e-06	1.7084
	754	9-1993578	9	1993578	T/C	0.36	2.49511	5.63317e-06	4.54235
	755	9-1980154	9	1980154	T/G	0.433	2.17396	6.37837e-06	5.82504
	756	9-10300245	9	10300245	A/C	0.133	4.98498	6.81839e-06	1.15443
	757	9-1827928	9	1827928	T/C	0.278	3.34456	7.55548e-06	2.50155
	758	9-2545134	9	2545134	C/T	0.353	2.91661	7.70914e-06	3.25685
	759	9-2887592	9	2887592	T/C	0.089	5.45136	7.71674e-06	0.954363
	760	9-4931140	9	4931140	G/C	0.287	3.18948	8.17024e-06	2.72112
	761	9-4931161	9	4931161	A/G	0.287	3.18948	8.17024e-06	2.72112
	762	9-4931166	9	4931166	G/C	0.287	3.18948	8.17024e-06	2.72112
	763	9-4931182	9	4931182	G/A	0.287	3.18948	8.17024e-06	2.72112
	764	9-4931189	9	4931189	A/G	0.287	3.18948	8.17024e-06	2.72112
	765	9-11761419	9	11761419	G/T	0.05	9.02476	8.26795e-06	0.34771
	766	9-1880649	9	1880649	G/A	0.466	2.05906	8.37608e-06	6.27343
	767	9-18500604	9	18500604	G/C	0.5	2.03811	8.60019e-06	6.37739
	768	9-1993324	9	1993324	G/A	0.34	2.51981	8.79579e-06	4.25611
	769	9-1880506	9	1880506	G/A	0.473	2.03826	8.88504e-06	6.35507
	770	9-1880573	9	1880573	G/A	0.473	2.03826	8.88504e-06	6.35507
	771	9-1993492	9	1993492	C/T	0.353	2.48693	8.92207e-06	4.35788
	772	9-1667727	9	1667727	C/T	0.365	2.5107	8.96273e-06	4.27723
	773	9-4930910	9	4930910	G/A	0.277	3.1794	9.03075e-06	2.70867
	774	9-16372530	9	16372530	C/T	0.051	6.84031	9.10805e-06	0.597323
	775	9-1663545	9	1663545	T/C	0.315	2.87365	9.19686e-06	3.28929
	776	9-2081856	9	2081856	A/G	0.318	2.78913	9.59945e-06	3.46865
	777	9-2000872	9	2000872	A/T	0.324	2.6654	9.60622e-06	3.78538
	778	9-2000861	9	2000861	C/T	0.338	2.51006	9.88728e-06	4.23484
	779	10-1022162	10	1022162	A/G	0.227	4.41239	9.87626e-07	1.77951
	780	10-20976232	10	20976232	C/T	0.24	4.09138	1.81381e-06	1.94868
	781	10-1022165	10	1022165	A/G	0.213	4.21928	4.05636e-06	1.6935
	782	10-21000760	10	21000760	G/A	0.467	2.06471	5.62122e-06	6.499
	783	10-20614290	10	20614290	T/C	0.327	2.60871	7.63514e-06	4.04222
	784	10-1022136	10	1022136	T/A	0.227	4.07559	8.16285e-06	1.68443
	785	10-21179724	10	21179724	G/A	0.347	2.14792	9.7104e-06	5.70586
	786	11-13384057	11	13384057	T/G	0.113	4.4459	2.05177e-06	1.63554
	787	11-12008084	11	12008084	C/T	0.057	8.27931	2.8165e-06	0.46233
	788	11-13593390	11	13593390	T/C	0.08	6.13506	3.2276e-06	0.827332
	789	11-19545686	11	19545686	A/G	0.05	7.41649	5.09074e-06	0.541464
	790	11-20552801	11	20552801	G/A	0.387	2.0908	7.47018e-06	6.16809
	791	11-20555192	11	20555192	C/T	0.387	2.0908	7.47018e-06	6.16809
	792	11-20578980	11	20578980	C/T	0.387	2.0908	7.47018e-06	6.16809
	793	11-20633925	11	20633925	G/A	0.397	2.10811	7.55556e-06	6.06632
	794	11-20616145	11	20616145	G/A	0.351	2.12445	9.6301e-06	5.83032
	795	12-1780906	12	1780906	C/T	0.164	4.71399	1.15667e-06	1.53966
	796	12-1781073	12	1781073	G/A	0.149	4.79275	1.29942e-06	1.47395
	797	12-1780448	12	1780448	C/T	0.158	4.74244	1.34243e-06	1.50028
	798	12-1780480	12	1780480	G/A	0.158	4.74244	1.34243e-06	1.50028
	799	12-1780494	12	1780494	A/G	0.158	4.74244	1.34243e-06	1.50028
	800	12-1780811	12	1780811	C/A	0.155	4.65738	2.04619e-06	1.49295
	801	12-2384720	12	2384720	G/A	0.185	4.42497	3.13446e-06	1.58298
	802	12-13156184	12	13156184	C/T	0.439	2.61492	3.9066e-06	4.30859
	803	12-2472552	12	2472552	C/A	0.284	2.30015	5.62279e-06	5.30346
	804	12-10319615	12	10319615	G/A	0.052	10.9953	5.89996e-06	0.243237
aSingle nucleotide polymorphism, bChromosome, cFavourable/ Alternate allele, dMinor frequency allele, ePercent phenotypic variation explianed by SNP

## Sheet: Supplementary Table 3
Supplemntary Table 3 | List of genome-wide significant SNPs associated with number of spikelets per panicle in a panel of 190 diverse rice accessions of the URMC, consisting of the Combined, Indica, and Japonica populations under high nighttime temperature (HNT)stress.
Population	Locus	SNPa	Chrb	Position (bp)	Allelesc	MAFd	Allelic effect	P-value	%PVEe
Combined	1	1-19418582	1	19418582	T/C	0.369	-17.8482	1.58776e-06	0.0953686
	2	1-28589377	1	28589377	C/G	0.299	-16.3688	4.07027e-06	0.103953
	3	1-28608624	1	28608624	T/C	0.454	11.857	4.13981e-06	0.197612
	4	1-27022445	1	27022445	C/A	0.057	21.3076	6.73224e-06	0.0584323
	5	6-13891360	6	13891360	T/C	0.173	19.1213	1.4757e-06	0.0836417
	6	8-9848074	8	9848074	C/T	0.268	15.5214	7.01013e-07	0.135262
	7	8-9871245	8	9871245	C/T	0.221	19.2799	1.10335e-06	0.0843895
	8	8-9946036	8	9946036	A/T	0.253	15.2445	1.88206e-06	0.128712
	9	8-9846088	8	9846088	G/A	0.247	15.4093	3.0761e-06	0.120431
	10	8-9871299	8	9871299	G/A	0.221	18.3474	3.16865e-06	0.0847433
	11	8-10119820	8	10119820	C/T	0.443	12.7312	3.45032e-06	0.17444
	12	8-9870373	8	9870373	C/T	0.203	21.3754	3.93588e-06	0.0611822
	13	8-9913676	8	9913676	C/T	0.41	10.7816	4.22975e-06	0.23841
	14	8-9833993	8	9833993	T/A	0.415	10.636	5.03997e-06	0.24086
	15	8-9914005	8	9914005	C/T	0.412	10.6459	5.20499e-06	0.239662
	16	8-9848675	8	9848675	C/T	0.319	12.178	5.85516e-06	0.181154
	17	8-9845812	8	9845812	C/T	0.346	11.1984	7.09711e-06	0.210117
	18	8-9914159	8	9914159	C/T	0.409	10.6138	7.27341e-06	0.233269
	19	8-13857664	8	13857664	A/G	0.451	15.6661	7.34776e-06	0.107099
	20	8-9874130	8	9874130	G/A	0.321	11.5726	7.89026e-06	0.19469
	21	8-9843878	8	9843878	A/T	0.135	20.1142	8.03956e-06	0.0644089
	22	8-9859087	8	9859087	C/G	0.413	10.3273	8.92844e-06	0.241307
	23	8-9946168	8	9946168	C/A	0.232	15.7934	9.04212e-06	0.10319
	24	8-9915700	8	9915700	C/T	0.411	10.3207	9.3758e-06	0.240414
	25	8-9915203	8	9915203	G/A	0.417	10.267	9.8591e-06	0.241679
	26	8-9915972	8	9915972	C/T	0.417	10.267	9.8591e-06	0.241679
	27	8-9916201	8	9916201	G/A	0.417	10.267	9.8591e-06	0.241679
	28	9-7977301	9	7977301	T/C	0.285	-18.4028	5.33312e-06	0.0801417
	29	11-24304485	11	24304485	C/T	0.056	18.8658	4.51924e-06	0.0774948
	30	11-15283739	11	15283739	C/A	0.068	24.5077	6.76066e-06	0.044157
	31	12-3958459	12	3958459	A/G	0.331	-12.6769	5.73993e-06	0.167527
Indica	1	1-38240793	1	38240793	T/A	0.188	23.374	1.11391e-06	0.0607893
	2	2-15272270	2	15272270	G/T	0.099	-27.6252	3.87606e-06	0.0386482
	3	3-19537670	3	19537670	A/G	0.225	18.6417	1.94029e-06	0.0907362
	4	5-8576331	5	8576331	A/T	0.294	21.6291	1.01226e-06	0.0716051
	5	6-5816783	6	5816783	C/T	0.119	25.4184	4.7409e-06	0.0447312
	6	6-1403182	6	1403182	G/A	0.325	-11.8888	6.48676e-06	0.197689
	7	6-14802337	6	14802337	G/A	0.123	-24.9892	7.65747e-06	0.0440428
	8	8-2651719	8	2651719	T/C	0.17	27.4913	3.64255e-06	0.0392675
	9	8-4888116	8	4888116	T/A	0.134	-25.4391	4.37623e-06	0.0450213
	10	8-8291368	8	8291368	A/T	0.263	-21.9191	7.34717e-06	0.0574864
	11	9-18589326	9	18589326	G/T	0.108	-32.2119	4.62611e-08	0.0416311
	12	9-18589339	9	18589339	T/A	0.108	-32.0713	1.13345e-07	0.0391972
	13	9-1993354	9	1993354	T/A	0.142	24.5318	3.91138e-06	0.04896
	14	9-7977301	9	7977301	T/C	0.324	-23.1153	4.13271e-06	0.0548378
	15	10-11085752	10	11085752	G/A	0.157	-25.1533	8.20704e-06	0.0431529
	16	11-1226872	11	1226872	C/A	0.253	26.0838	2.82991e-06	0.0447146
	17	11-19553713	11	19553713	A/G	0.113	27.4802	3.05251e-06	0.0399907
	18	11-15283739	11	15283739	C/A	0.074	30.6934	3.05326e-06	0.0320575
	19	11-1226886	11	1226886	G/A	0.258	25.7513	3.46097e-06	0.0449782
	20	11-1226907	11	1226907	G/A	0.25	25.2664	6.49078e-06	0.043834
	21	11-1226913	11	1226913	A/G	0.25	25.2664	6.49078e-06	0.043834
	22	11-24441456	11	24441456	C/T	0.087	-31.7269	8.52458e-06	0.0270186
	23	11-1226954	11	1226954	A/G	0.237	23.1122	8.68978e-06	0.050798
	24	12-1283997	12	1283997	G/A	0.471	14.6507	2.73126e-06	0.142086
	25	12-1114776	12	1114776	G/A	0.304	17.9549	4.20984e-06	0.0906882
	26	12-1275477	12	1275477	C/G	0.465	13.8331	5.3411e-06	0.149052
	27	12-1111810	12	1111810	G/A	0.265	24.3884	5.57145e-06	0.0477936
	28	12-1139631	12	1139631	G/T	0.461	13.7907	7.57956e-06	0.144623
	29	12-1137234	12	1137234	T/C	0.5	13.3316	7.6276e-06	0.154636
	30	12-1271499	12	1271499	C/T	0.48	13.6863	9.59698e-06	0.143198
	31	12-1110387	12	1110387	A/G	0.485	13.5924	9.68802e-06	0.145034
Japonica	1	1-17868605	1	17868605	G/A	0.051	82.5834	5.48161e-06	0.00435621
	2	1-28429591	1	28429591	T/G	0.333	18.859	6.71691e-06	0.0816674
	3	4-27877753	4	27877753	G/A	0.054	31.9836	1.11965e-06	0.0340629
	4	6-13772308	6	13772308	C/T	0.151	29.5622	6.42501e-06	0.0334122
	5	6-227312	6	227312	G/A	0.053	29.8723	6.66644e-06	0.0325925
	6	7-27012021	7	27012021	G/A	0.053	47.4147	3.02218e-06	0.014059
	7	9-12454984	9	12454984	G/A	0.053	29.2032	7.63807e-06	0.0336021
	8	10-22904985	10	22904985	T/C	0.054	81.0902	8.59489e-06	0.0043032
	9	11-6639823	11	6639823	C/T	0.055	44.8042	9.94229e-06	0.0138686
	10	12-7266503	12	7266503	A/C	0.06	65.682	4.00968e-07	0.00888021
	11	12-7266504	12	7266504	T/G	0.06	65.682	4.00968e-07	0.00888021
aSingle nucleotide polymorphism, bChromosome, cFavourable/ Alternate allele, dMinor frequency allele, ePercent phenotypic variation explianed by SNP

## Sheet: Supplementary Table 4
Supplementary Table 4	Supllementary Table 4| Highly significant SNPs associated with panicle length (PL) and number of spikelets per panicle (NSP) in the Combined, Indica, and Japonica populations co-localized with previuously identified QTLs related to grain yield componenets under heat stress.
S.No.	Population-Traita	High Signif GWAS SNPb	Chrc	SNP Posd (bp)	P-value	Previously Reported QTLs	QTLs Regions (bp)	Grain Yield Components	Reference
1		1-26128676	1	26128676	4.13439e-07
2		1-26128655	1	26128655	4.57406e-07
3		1-26128661	1	26128661	4.57406e-07
4		1-26128681	1	26128681	4.13439e-07
5	Japonica-PL	1-26128687	1	26128687	4.13439e-07
6		1-26128691	1	26128691	4.13439e-07
7		1-26128693	1	26128693	4.13439e-07
8		1-26128700	1	26128700	4.13439e-07
9		1-26128712	1	26128712	4.57406e-07
10		1-27022445	1	27022445	6.73224e-06
11	Combined-NSP	1-28589377	1	28589377	4.07027e-06
12		1-28608624	1	28608624	4.13981e-06
13	Japonica-NSP	1-28429591	1	28429591	6.71691e-06
14		1-29984964	1	29984964	7.02248e-06
15		1-29984969	1	29984969	9.51595e-06
16		1-29986464	1	29986464	7.02248e-06
17		1-30062094	1	30062094	5.46923e-06
18		1-30072052	1	30072052	5.24045e-06
19		1-30061496	1	30061496	5.7848e-06
20		1-30061775	1	30061775	5.7848e-06
21	Japonica-PL	1-30062113	1	30062113	5.7848e-06	qHTB1-1 , qPSLht1, qSF1, qFLL1.1, qPH1.1, qPNL1.1, qPL1.1, qGN1.1, qHTSF1.1, qHTSF1.1, qHTB1	21,903,066-42,924,841	SF,PS,FLL, PH, PNL, PL, GN, SF	Ye et al., 2012, Zhao et al., 2016, Zhu et al., 2017,Cao et al., 2020, Nubanhkoh et al., 2020
22		1-30062141	1	30062141	9.06081e-06
23		1-30062994	1	30062994	5.7848e-06
24		1-30063753	1	30063753	5.7848e-06
25		1-30064440	1	30064440	5.7848e-06
26		1-30066200	1	30066200	5.7848e-06
27		1-30067853	1	30067853	5.7848e-06
28		1-30068207	1	30068207	5.7848e-06
29		1-30070424	1	30070424	5.7848e-06
30		1-30070588	1	30070588	5.7848e-06
31		1-30070875	1	30070875	9.73443e-06
32		1-30070923	1	30070923	9.73443e-06
33		1-30071661	1	30071661	5.7848e-06
34		1-30071700	1	30071700	5.7848e-06
35		1-30071793	1	30071793	5.7848e-06
36		1-30072202	1	30072202	5.7848e-06
37		1-30073192	1	30073192	5.7848e-06
38		1-34350295	1	34350295	8.83683e-07
39		1-34355283	1	34355283	2.42686e-06
40		1-34357632	1	34357632	5.01948e-06
41		1-34366378	1	34366378	2.14072e-06
42		1-34377354	1	34377354	1.80379e-06
43		1-34383491	1	34383491	2.31159e-06
44		1-34389518	1	34389518	2.14072e-06
45		1-34396152	1	34396152	2.14072e-06
46		1-34396377	1	34396377	2.14072e-06
47		1-34406089	1	34406089	5.68958e-06
48		1-30073335	1	30073335	5.7848e-06
49	Indica-NSP	1-38240793	1	38240793	1.11391e-06
50	Indica-PL	1-41250350	1	41250350	7.2937e-06
51		1-41276762	1	41276762	8.41226e-06
52		2-11433645	2	11433645	7.96279e-06
53		2-11557769	2	11557769	3.53137e-07
54		2-11557776	2	11557776	2.18475e-06
55		2-14324294	2	14324294	7.60237e-06
56		2-14710337	2	14710337	4.13143e-06
57		2-14710338	2	14710338	8.78122e-06
58		2-15794979	2	15794979	8.7034e-06
59		2-15794990	2	15794990	2.6903e-06
60	Japonica-PL	2-15795005	2	15795005	2.6903e-06	qSFht2	11,336,372-35,425,926	SF	Zhao et al., 2016
61		2-15795021	2	15795021	1.32981e-06
62		2-15795055	2	15795055	1.32981e-06
63		2-17138809	2	17138809	3.91882e-07
64		2-17598710	2	17598710	4.7237e-06
65		2-17598715	2	17598715	4.7237e-06
66		2-17598725	2	17598725	3.2848e-06
67		2-19768847	2	19768847	2.74808e-06
68		2-27221816	2	27221816	2.67103e-06
69		2-29632319	2	29632319	6.37787e-06
70		3-18707478	3	18707478	2.03506e-06
71	Indica-PL	3-19209801	3	19209801	3.67858e-06
72		3-21403921	3	21403921	5.06971e-08	qHTB3-2	12,326,558-22,391,497	SF	Zhu et al., 2017
73	Indica-NSP	3-19537670	3	19537670	1.94029e-06
74		4-15906005	4	15906005	7.66532e-06
75		4-15906025	4	15906025	3.18699e-06
76	Japonica-PL	4-16091307	4	16091307	2.61191e-06
77		4-21043263	4	21043263	4.07686e-06	qSSP4, qSN4, qHTS4, qRSS4, qFLL4.1, qGN4.1, qHTSF4.1, qHTSF4.2, qFGP4-1	15,742,285-34,529,916	FGP, SN, SF, FLL, GN, SF	Xiao et al., 2011, Li et al.,2018, Chi et al., 2002,Ye et al., 2012
78		4-21043270	4	21043270	9.63962e-06
79	Japonica-NSP	4-27877753	4	27877753	1.11965e-06
80	Japonica-PL	4-30345657	4	30345657	7.24528e-06
81		5-6830712	5	6830712	9.86236e-07
82		5-6830714	5	6830714	9.86236e-07
83		5-6830717	5	6830717	9.86236e-07
84	Japonica-PL	5-6830758	5	6830758	4.10137e-06	qHD5.1, qHTSF5.1	3,050,000-24,140,000	HD, SF	Ye et al., 2012
85		5-6830759	5	6830759	4.10137e-06
86		5-11240238	5	11240238	3.12596e-07
87		5-19193663	5	19193663	5.69612e-06
88		7-24265876	7	24265876	7.65503e-06
89		7-25699158	7	25699158	8.3189e-06
90	Indica-PL	7-25699167	7	25699167	4.55977e-06
91		7-25699169	7	25699169	1.20127e-06
92		7-25699170	7	25699170	1.20127e-06
93		7-26087918	7	26087918	9.44892e-06
94		7-26091886	7	26091886	1.34202e-06
95		7-26091991	7	26091991	8.40764e-07
96		7-26092079	7	26092079	1.01109e-06
97		7-26092398	7	26092398	4.93995e-06
98		7-26093655	7	26093655	6.73126e-07
99		7-26095370	7	26095370	8.40764e-07
100		7-26095456	7	26095456	8.40764e-07
101		7-26095919	7	26095919	8.40764e-07
102		7-26095931	7	26095931	1.82734e-06
103	Japonica-PL	7-26097119	7	26097119	1.75211e-06	qPSLht7	18,392,792-26,774,163	PS	Zhao et al., 2016
104		7-26099029	7	26099029	6.35333e-07
105		7-26099337	7	26099337	8.40764e-07
106		7-26100608	7	26100608	4.02115e-06
107		7-26101402	7	26101402	4.02115e-06
108		7-26106766	7	26106766	2.95533e-06
109		7-26107583	7	26107583	4.02115e-06
110		7-26109972	7	26109972	4.02115e-06
111		7-26113429	7	26113429	3.40849e-07
112		7-26125167	7	26125167	4.02115e-06
113		7-26127407	7	26127407	4.74231e-06
114		7-26218255	7	26218255	2.35932e-06
115		7-26232344	7	26232344	5.0999e-07
116		7-26396706	7	26396706	9.4501e-06
117		7-26624159	7	26624159	1.70536e-06
118		7-26714879	7	26714879	1.52038e-06
119		7-26722914	7	26722914	9.8889e-06
120		8-3453567	8	3453567	7.03628e-06
121	Japonica-PL	8-3453600	8	3453600	1.31449e-06	qHTT8, qDFT8	3,555,000 - 428,236,059	SF, DFT	Zhao et al., 2016, Chen at al., 2021
122		8-3453643	8	3453643	6.88758e-06
123		8-24745317	8	24745317	5.91633e-06
124	Japonica-PL	9-16372530	9	16372530	9.10805e-06	qSTIPSS9.1	16,750,000-17,140,000	SS	Sanmugavadivel et al., 2017
125		10-20614290	10	20614290	7.63514e-06
126		10-20976232	10	20976232	1.81381e-06
127	Japonica-PL	10-21000760	10	21000760	5.62122e-06	qDFT10.1, qHBT 10-2	18712016-23,010,897	DFT, SF	Zhao et al., 2016, Zhu et al., 2017
128		10-21179724	10	21179724	9.7104e-06
129	Japonica-NSP	10-22904985	10	22904985	8.59489e-06
130		11-17325103	11	17325103	5.85827e-07
131		11-18077235	11	18077235	3.9687e-06
132		11-19545686	11	19545686	5.09074e-06
133	Japonica-PL	11-20552801	11	20552801	7.47018e-06
134		11-20555192	11	20555192	7.47018e-06	qDFT11	17,204,553-24,661,748	DFT	Zhao et al., 2016
135		11-20578980	11	20578980	7.47018e-06
136		11-20616145	11	20616145	9.6301e-06
137		11-20633925	11	20633925	7.55556e-06
138	Combined-NSP	11-24304485	11	24304485	4.51924e-06
139	Indica-NSP	11-19553713	11	19553713	3.05251e-06
140		11-24441456	11	24441456	8.52458e-06
	aPopulation with trait, bHighly signifciant GWAS SNPs,cChromosome, dSNP position (bp)

## Sheet: Supplementary Table 5
Supplementary Table 5| List of putative candidate genes extracted from MSU rice data base using GWAS significant SNPs (p<0.001) associated with panicle length (cm) used in network analysis
Putative Potential Candiate Genes	SNP	P-value	Annotated function
LOC_Os04g23799	4-13601649	6.8032e-06	retrotransposon_protein,_putative,_Ty3-gypsy_subclass,_expressed
LOC_Os10g10640	10-5879261	8.4997e-06	retrotransposon_protein,_putative,_Ty3-gypsy_subclass,_expressed
LOC_Os01g59860	1-34621367	1.00627e-05	expressed_protein
LOC_Os09g02930	9-1375702	1.07419e-05	retrotransposon_protein,_putative,_Ty3-gypsy_subclass,_expressed
LOC_Os01g59660	1-34508771	1.24241e-05	MYB_family_transcription_factor,_putative,_expressed
LOC_Os05g18740	5-10863431	1.41328e-05	retrotransposon_protein,_putative,_unclassified,_expressed
LOC_Os12g19730	12-11493624	1.57994e-05	retrotransposon_protein,_putative,_unclassified
LOC_Os10g26210	10-13576925	1.66961e-05	retrotransposon_protein,_putative,_Ty3-gypsy_subclass,_expressed
LOC_Os12g35850	12-21844383	2.02104e-05	expressed_protein
LOC_Os01g59730	1-34550381	2.21177e-05	ribosomal_protein_L7Ae,_putative,_expressed
LOC_Os01g59710	1-34546011	2.46177e-05	expressed_protein
LOC_Os01g59760	1-34566079	2.57838e-05	bZIP_transcription_factor,_putative,_expressed
LOC_Os01g59800	1-34584515	2.57838e-05	EAP30/Vps36_family_domain_containing_protein,_expressed
LOC_Os01g59750	1-34560813	3.14939e-05	histidine_triad_family_protein,_putative,_expressed
LOC_Os01g59700	1-34536935	3.24842e-05	expressed_protein
LOC_Os03g05130	3-2494676	3.8793e-05	expressed_protein
LOC_Os10g26130	10-13538562	4.71243e-05	phenylalanyl-tRNA_synthetase,_putative,_expressed
LOC_Os06g03580	6-1385882	4.84356e-05	zinc_RING_finger_protein,_putative,_expressed
LOC_Os01g59790	1-34580542	4.90886e-05	ADP-ribosylation_factor,_putative,_expressed
LOC_Os01g49840	1-28622527	4.96206e-05	hypothetical_protein
LOC_Os05g47590	5-27264731	5.11725e-05	expressed_protein
LOC_Os01g59740	1-34558698	5.29031e-05	expressed_protein
LOC_Os12g13590	12-7638877	5.59292e-05	exocyst_complex_component_5,_putative,_expressed
LOC_Os10g30010	10-15577326	5.87442e-05	retrotransposon_protein,_putative,_unclassified,_expressed
LOC_Os07g43870	7-26232344	6.67021e-05	heat_shock_protein_DnaJ,_putative,_expressed
LOC_Os01g59720	1-34548144	6.87471e-05	expressed_protein
LOC_Os01g50616	1-29066869	7.94629e-05	phosphatidylinositol_transfer,_putative,_expressed
LOC_Os09g06270	9-2943049	8.26076e-05	retrotransposon_protein,_putative,_Ty3-gypsy_subclass,_expressed
LOC_Os02g56880	2-34866903	8.30416e-05	transcriptional_corepressor_LEUNIG,_putative,_expressed
LOC_Os09g04010	9-2059006	8.33086e-05	transposon_protein,_putative,_CACTA,_En/Spm_sub-class,_expressed
LOC_Os12g35895	12-21874849	8.35291e-05	expressed_protein
LOC_Os01g49730	1-28572692	8.37326e-05	expressed_protein
LOC_Os01g60290	1-34885840	8.64393e-05	expressed_protein
LOC_Os09g34870	9-20324119	8.67884e-05	pentatricopeptide,_putative,_expressed
LOC_Os04g53540	4-31904145	8.72206e-05	homeobox_and_START_domains_containing_protein,_putative,_expressed
LOC_Os01g59780	1-34575025	8.77595e-05	AP2_domain_containing_protein,_expressed
LOC_Os01g49529	1-28485040	9.03921e-05	OsWAK10d_-_OsWAK_receptor-like_cytoplasmic_kinase_OsWAK-RLCK,_expressed
LOC_Os01g59930	1-34652319	9.39349e-05	NADH-cytochrome_b5_reductase,_putative,_expressed
LOC_Os01g59970	1-34675221	0.000107212	expressed_protein
LOC_Os02g28960	2-17138809	0.000107978	retrotransposon_protein,_putative,_Ty3-gypsy_subclass,_expressed
LOC_Os01g59990	1-34682519	0.000111114	ribosomal_protein_L24,_putative,_expressed
LOC_Os01g60000	1-34685786	0.000111114	pentatricopeptide,_putative,_expressed
LOC_Os01g60040	1-34706964	0.000111114	HEAT_repeat_family_protein,_putative,_expressed
LOC_Os12g01350	12-207033	0.00011234	csAtPR5,_putative,_expressed
LOC_Os12g35920	12-21890400	0.000114007	expressed_protein
LOC_Os01g60010	1-34690206	0.000116391	PPR_repeat_domain_containing_protein,_putative,_expressed
LOC_Os01g23550	1-13225023	0.000117469	retrotransposon_protein,_putative,_unclassified,_expressed
LOC_Os06g35600	6-20774349	0.000118248	retrotransposon,_putative,_centromere-specific,_expressed
LOC_Os09g02890	9-1355247	0.000118399	transposon_protein,_putative,_unclassified
LOC_Os04g58630	4-34874134	0.000119533	DNA_mismatch_repair_protein_MSH3,_putative,_expressed
LOC_Os01g55094	1-31678500	0.000121862	expressed_protein
LOC_Os01g52280	1-30056335	0.000123898	NB-ARC_domain_containing_protein,_expressed
LOC_Os01g59940	1-34658817	0.000125355	expressed_protein
LOC_Os01g59870	1-34626859	0.000128419	LTPL65_-_Protease_inhibitor/seed_storage/LTP_family_protein_precursor,_expressed
LOC_Os01g50622	1-29072901	0.000130494	DNA-binding_protein_DSP1,_putative,_expressed
LOC_Os01g50450	1-28970837	0.000135527	expressed_protein
LOC_Os12g35890	12-21869882	0.00014048	FAD_dependent_oxidoreductase_domain_containing_protein,_expressed
LOC_Os05g17320	5-9924926	0.000142428	retrotransposon_protein,_putative,_Ty3-gypsy_subclass,_expressed
LOC_Os01g49970	1-28716032	0.000142675	retrotransposon_protein,_putative,_unclassified,_expressed
LOC_Os06g49890	6-30204309	0.000150751	coiled-coil_domain-containing_protein_90A,_mitochondrial_precursor,_putative,_expressed
LOC_Os01g59910	1-34643444	0.000151506	OsFBX29_-_F-box_domain_containing_protein,_expressed
LOC_Os01g55795	1-32144745	0.000152389	expressed_protein
LOC_Os08g23640	8-14308446	0.000152815	retrotransposon_protein,_putative,_unclassified
LOC_Os02g51400	2-31476314	0.00015379	AAA_family_ATPase,_putative,_expressed
LOC_Os07g43830	7-26218255	0.000158428	nucleic_acid_binding_protein,_putative,_expressed
LOC_Os01g50680	1-29105108	0.000167409	OsSub2_-_Putative_Subtilisin_homologue,_expressed
LOC_Os01g60270	1-34862627	0.000168552	homeobox_domain_containing_protein,_expressed
LOC_Os01g59850	1-34612629	0.000171658	GTPase-activating_protein,_putative,_expressed
LOC_Os01g59840	1-34605921	0.000185785	Os1bglu3_-_beta-glucosidase_homologue,_similar_to_G._max_isohydroxyurate_hydrolase,_expressed
LOC_Os12g31729	12-19094733	0.000187504	transposon_protein,_putative,_unclassified,_expressed
LOC_Os04g35300	4-21467549	0.00019005	SLL1_protein,_putative,_expressed
LOC_Os01g59980	1-34681487	0.000191261	zinc_finger_family_protein,_putative,_expressed
LOC_Os09g03110	9-1478927	0.000194459	retrotransposon_protein,_putative,_Ty3-gypsy_subclass,_expressed
LOC_Os01g71100	1-41150104	0.000202825	expressed_protein
LOC_Os05g28120	5-16443541	0.000204494	transposon_protein,_putative,_unclassified,_expressed
LOC_Os10g26040	10-13484466	0.000204509	retrotransposon_protein,_putative,_unclassified,_expressed
LOC_Os08g12560	8-7435144	0.000213607	retrotransposon_protein,_putative,_unclassified,_expressed
LOC_Os12g38280	12-23507175	0.000216954	retrotransposon_protein,_putative,_Ty3-gypsy_subclass,_expressed
LOC_Os05g47670	5-27318124	0.000217948	zinc_finger,_C3HC4_type_domain_containing_protein,_expressed
LOC_Os07g35680	7-21369159	0.000218954	TKL_IRAK_DUF26-lc22_-_DUF26_kinases_have_homology_to_DUF26_containing_loci,_expressed
LOC_Os07g33530	7-20037799	0.00022187	transposon_protein,_putative,_unclassified
LOC_Os03g36630	3-20314612	0.00022242	expressed_protein
LOC_Os06g03600	6-1389763	0.000223964	transcriptional_corepressor_SEUSS,_putative,_expressed
LOC_Os12g31748	12-19106260	0.000226728	OsMADS20_-_MADS-box_family_gene_with_MIKCc_type-box,_expressed
LOC_Os01g59819	1-34589129	0.00022689	Os1bglu2_-_beta-glucosidase_homologue,_similar_to_G._max_isohydroxyurate_hydrolase,_expressed
LOC_Os01g49760	1-28578148	0.000228718	expressed_protein
LOC_Os09g30400	9-18500604	0.000232102	WRKY90,_expressed
LOC_Os07g43600	7-26099029	0.000235913	ribonuclease_T2_family_domain_containing_protein,_expressed
LOC_Os01g49710	1-28567047	0.000237531	glutathione_S-transferase,_putative,_expressed
LOC_Os11g06650	11-3234973	0.000238999	transcription_elongation_factor_protein,_putative,_expressed
LOC_Os11g18600	11-10496222	0.000241812	retrotransposon_protein,_putative,_Ty3-gypsy_subclass,_expressed
LOC_Os08g22900	8-13774810	0.000245682	retrotransposon_protein,_putative,_unclassified
LOC_Os11g47600	11-28759155	0.000263187	glycosyl_hydrolase,_putative,_expressed
LOC_Os10g11506	10-6373801	0.000267256	retrotransposon_protein,_putative,_unclassified,_expressed
LOC_Os09g03570	9-1755279	0.000267347	retrotransposon,_putative,_centromere-specific,_expressed
LOC_Os06g49880	6-30196922	0.000272883	B-box_zinc_finger_family_protein,_putative,_expressed
LOC_Os09g06350	9-2987613	0.000275547	retrotransposon_protein,_putative,_unclassified,_expressed
LOC_Os05g03660	5-1585156	0.000282836	retrotransposon_protein,_putative,_unclassified,_expressed
LOC_Os11g21970	11-12614517	0.000283247	transposon_protein,_putative,_CACTA,_En/Spm_sub-class,_expressed
LOC_Os11g14390	11-8082931	0.000288201	expressed_protein
LOC_Os09g02420	9-1002444	0.000292974	expressed_protein
LOC_Os05g17110	5-9774666	0.000293717	retrotransposon_protein,_putative,_unclassified,_expressed
LOC_Os05g27860	5-16245733	0.00029489	transposon_protein,_putative,_CACTA,_En/Spm_sub-class,_expressed
LOC_Os06g06890	6-3271336	0.000299041	expressed_protein
LOC_Os05g24160	5-13946617	0.000300637	double-stranded_RNA_binding_motif_containing_protein,_expressed
LOC_Os03g05610	3-2805381	0.000301461	inorganic_phosphate_transporter,_putative,_expressed
LOC_Os01g59880	1-34630151	0.000306008	inositol-1,_4,_5-trisphosphate_5-phosphatase,_putative,_expressed
LOC_Os03g56100	3-31960329	0.000308352	expressed_protein
LOC_Os01g48840	1-28027606	0.000309784	hypothetical_protein
LOC_Os10g10334	10-5680880	0.000310409	expressed_protein
LOC_Os08g29540	8-18110761	0.00031446	retrotransposon_protein,_putative,_unclassified,_expressed
LOC_Os01g59920	1-34647037	0.000314817	cysteine_synthase,_chloroplast_precursor,_putative,_expressed
LOC_Os12g35880	12-21864371	0.000315052	retrotransposon_protein,_putative,_unclassified,_expressed
LOC_Os02g48390	2-29625878	0.000315133	phosphoribosyl_transferase,_putative,_expressed
LOC_Os08g10260	8-5967585	0.000317262	NBS-LRR_disease_resistance_protein,_putative,_expressed
LOC_Os04g05060	4-2493601	0.000321287	cytochrome_P450_94A1,_putative,_expressed
LOC_Os09g03510	9-1732939	0.000326768	hypothetical_protein
LOC_Os12g35860	12-21851493	0.000332886	retrotransposon_protein,_putative,_unclassified
LOC_Os04g16230	4-8815984	0.000337907	expressed_protein
LOC_Os02g15000	2-8367268	0.000342564	zinc_finger,_C3HC4_type_domain_containing_protein,_expressed
LOC_Os05g47540	5-27230768	0.0003458	CPuORF26_-_conserved_peptide_uORF-containing_transcript,_expressed
LOC_Os05g47545	5-27230768	0.0003458	expressed_protein
LOC_Os02g14910	2-8324189	0.000349563	bZIP_transcription_factor_family_protein,_putative,_expressed
LOC_Os01g59890	1-34636238	0.000352059	pentatricopeptide,_putative,_expressed
LOC_Os01g01900	1-489371	0.000352413	retrotransposon_protein,_putative,_unclassified,_expressed
LOC_Os03g29660	3-16912664	0.000356004	retrotransposon_protein,_putative,_unclassified,_expressed
LOC_Os03g01110	3-80559	0.000364763	RNA_methyltransferase,_TrmH_family_protein,_putative,_expressed
LOC_Os08g44520	8-28000058	0.000380123	peptidyl-prolyl_cis-trans_isomerase,_putative,_expressed
LOC_Os08g08410	8-4847281	0.000381179	retrotransposon_protein,_putative,_Ty3-gypsy_subclass,_expressed
LOC_Os01g40870	1-23113859	0.00038166	aldehyde_dehydrogenase,_putative,_expressed
LOC_Os09g03470	9-1707434	0.000390226	retrotransposon_protein,_putative,_unclassified,_expressed
LOC_Os09g03100	9-1475549	0.000395913	retrotransposon_protein,_putative,_Ty3-gypsy_subclass,_expressed
LOC_Os01g57670	1-33344663	0.000399361	transposon_protein,_putative,_CACTA,_En/Spm_sub-class,_expressed
LOC_Os12g29440	12-17489759	0.000399411	retrotransposon,_putative,_centromere-specific
LOC_Os09g03460	9-1704844	0.000400093	retrotransposon_protein,_putative,_unclassified,_expressed
LOC_Os11g23740	11-13418836	0.000402256	retrotransposon_protein,_putative,_Ty1-copia_subclass
LOC_Os08g03920	8-1866875	0.000403517	retrotransposon_protein,_putative,_Ty3-gypsy_subclass,_expressed
LOC_Os12g36670	12-22458562	0.000404221	F-box/LRR-repeat_protein_3,_putative,_expressed
LOC_Os04g02180	4-733824	0.000404281	retrotransposon,_putative,_centromere-specific,_expressed
LOC_Os12g38620	12-23726910	0.000409625	bromodomain_associated_family_protein,_expressed
LOC_Os02g14990	2-8363641	0.000410991	zinc_finger,_C3HC4_type_domain_containing_protein,_expressed
LOC_Os01g09700	1-5005584	0.000412506	aminotransferase,_classes_I_and_II,_domain_containing_protein,_expressed
LOC_Os02g57220	2-35059115	0.000412959	WD_domain,_G-beta_repeat_domain_containing_protein,_expressed
LOC_Os09g03610	9-1791862	0.000418227	flowering_time_control_protein_FCA,_putative,_expressed
LOC_Os09g03630	9-1814409	0.000418227	ankyrin,_putative,_expressed
LOC_Os09g03660	9-1840050	0.000418227	retrotransposon_protein,_putative,_unclassified,_expressed
LOC_Os02g04970	2-2332298	0.000418452	expressed_protein
LOC_Os02g47420	2-28953540	0.000419321	ATROPGEF7/ROPGEF7,_putative,_expressed
LOC_Os09g03140	9-1503779	0.00041947	cytokinin-O-glucosyltransferase_2,_putative,_expressed
LOC_Os09g03670	9-1845762	0.00042741	retrotransposon_protein,_putative,_unclassified,_expressed
LOC_Os10g29720	10-15452819	0.000429187	expressed_protein
LOC_Os10g41920	10-22552619	0.000432555	expressed_protein
LOC_Os07g49430	7-29600526	0.000435472	retrotransposon_protein,_putative,_unclassified,_expressed
LOC_Os04g33260	4-20119802	0.000438273	expressed_protein
LOC_Os09g02880	9-1352365	0.000441436	hypothetical_protein
LOC_Os02g50540	2-30860010	0.000441824	expressed_protein
LOC_Os04g49930	4-29779776	0.000443807	sensitivity_to_red_light_reduced_protein_1,_putative,_expressed
LOC_Os02g14929	2-8326252	0.000444242	T-complex_protein,_putative,_expressed
LOC_Os12g24760	12-14203858	0.000447319	retrotransposon_protein,_putative,_Ty3-gypsy_subclass,_expressed
LOC_Os02g15240	2-8515097	0.000448805	transposon_protein,_putative,_unclassified,_expressed
LOC_Os11g22780	11-13103667	0.00044946	retrotransposon,_putative,_centromere-specific,_expressed
LOC_Os02g16310	2-9277296	0.000451243	retrotransposon,_putative,_centromere-specific,_expressed
LOC_Os01g27834	1-15540501	0.000464419	hypothetical_protein
LOC_Os09g07030	9-3409089	0.000466542	expressed_protein
LOC_Os09g03590	9-1769300	0.000468677	retrotransposon_protein,_putative,_unclassified,_expressed
LOC_Os08g25430	8-15480959	0.000469112	cysteine-rich_receptor-like_protein_kinase_35_precursor,_putative,_expressed
LOC_Os05g41850	5-24510958	0.000474214	retrotransposon_protein,_putative,_Ty3-gypsy_subclass,_expressed
LOC_Os09g09220	9-4939855	0.000478139	protein_kinase_domain_containing_protein,_expressed
LOC_Os04g52710	4-31390443	0.000483203	imidazoleglycerol-phosphate_dehydratase,_putative,_expressed
LOC_Os10g41930	10-22555881	0.000485226	haloacid_dehalogenase-like_hydrolase_family_protein,_putative,_expressed
LOC_Os09g13740	9-8039344	0.000489658	SET_domain_containing_protein,_expressed
LOC_Os09g13820	9-8121159	0.000489658	pollen_signalling_protein_with_adenylyl_cyclase_activity,_putative,_expressed
LOC_Os11g22250	11-12769283	0.000489964	expressed_protein
LOC_Os09g13830	9-8125296	0.000496047	expressed_protein
LOC_Os09g03090	9-1464584	0.000496742	expressed_protein
LOC_Os11g23860	11-13510388	0.000498225	hypothetical_protein
LOC_Os06g20710	6-11929549	0.000503689	retrotransposon_protein,_putative,_unclassified,_expressed
LOC_Os10g41940	10-22558350	0.000508836	expressed_protein
LOC_Os08g33290	8-20745493	0.000514457	expressed_protein
LOC_Os09g03070	9-1450368	0.000516232	expressed_protein
LOC_Os04g19540	4-10875177	0.000516996	retrotransposon_protein,_putative,_Ty3-gypsy_subclass,_expressed
LOC_Os07g15030	7-8617639	0.000519568	retrotransposon_protein,_putative,_unclassified,_expressed
LOC_Os11g19950	11-11480669	0.000520122	retrotransposon_protein,_putative,_unclassified,_expressed
LOC_Os05g04170	5-1872842	0.000523207	AMP-binding_enzyme,_putative,_expressed
LOC_Os01g61890	1-35818201	0.000526185	AT_hook_motif_family_protein,_expressed
LOC_Os09g13770	9-8067218	0.000528085	retrotransposon_protein,_putative,_unclassified,_expressed
LOC_Os07g19530	7-11553738	0.000529395	peptidase,_putative,_expressed
LOC_Os05g08310	5-4540858	0.000537495	retrotransposon_protein,_putative,_Ty3-gypsy_subclass,_expressed
LOC_Os01g59900	1-34639765	0.000540759	expressed_protein
LOC_Os09g13780	9-8070592	0.000542052	retrotransposon_protein,_putative,_unclassified,_expressed
LOC_Os01g33970	1-18695350	0.00054456	transposon_protein,_putative,_CACTA,_En/Spm_sub-class,_expressed
LOC_Os01g46280	1-26315985	0.000546552	expressed_protein
LOC_Os03g33040	3-18896477	0.000547013	retrotransposon_protein,_putative,_unclassified
LOC_Os02g26440	2-15526180	0.000547214	prefoldin_subunit,_putative,_expressed
LOC_Os01g48720	1-27939491	0.000549116	RNA_polymerase_III_subunit_RPC82_family_protein,_putative,_expressed
LOC_Os07g27250	7-15841612	0.000554783	expressed_protein
LOC_Os10g17380	10-8759510	0.00055641	retrotransposon_protein,_putative,_unclassified
LOC_Os02g07630	2-3950454	0.000561531	copper-transporting_ATPase,_putative,_expressed
LOC_Os08g23020	8-13862052	0.000565903	retrotransposon_protein,_putative,_unclassified,_expressed
LOC_Os02g14360	2-7878054	0.000566594	retrotransposon_protein,_putative,_unclassified,_expressed
LOC_Os01g59690	1-34532128	0.000574891	OsFBX28_-_F-box_domain_containing_protein,_expressed
LOC_Os08g23040	8-13872111	0.000575798	retrotransposon_protein,_putative,_Ty3-gypsy_subclass,_expressed
LOC_Os02g47310	2-28895001	0.000578039	Cyclopropane-fatty-acyl-phospholipid_synthase,_putative,_expressed
LOC_Os04g52810	4-31440233	0.00057875	no_apical_meristem_protein,_putative,_expressed
LOC_Os01g46290	1-26323597	0.000581856	lipase,_putative,_expressed
LOC_Os04g06700	4-3530313	0.000603962	expressed_protein
LOC_Os04g53220	4-31698104	0.000608401	signal_recognition_particle_14_kDa_protein,_putative,_expressed
LOC_Os01g31400	1-17169415	0.00061117	retrotransposon,_putative,_centromere-specific
LOC_Os02g49150	2-30053686	0.000619008	RNA_polymerase_Rpb4,_putative,_expressed
LOC_Os05g20430	5-11985047	0.000619688	retrotransposon_protein,_putative,_unclassified,_expressed
LOC_Os04g34500	4-20887295	0.000623596	retrotransposon_protein,_putative,_unclassified,_expressed
LOC_Os05g05890	5-2960962	0.000623608	retrotransposon_protein,_putative,_Ty3-gypsy_subclass,_expressed
LOC_Os10g35180	10-18789920	0.000624463	white-brown_complex_homolog_protein_11,_putative,_expressed
LOC_Os03g39210	3-21776420	0.000626889	retrotransposon_protein,_putative,_unclassified,_expressed
LOC_Os10g26650	10-13913477	0.000628137	transposon_protein,_putative,_unclassified,_expressed
LOC_Os04g10910	4-5913315	0.000629926	expressed_protein
LOC_Os05g07930	5-4298574	0.000632311	retrotransposon_protein,_putative,_unclassified,_expressed
LOC_Os11g43460	11-26244819	0.000634349	retrotransposon_protein,_putative,_Ty3-gypsy_subclass,_expressed
LOC_Os11g22790	11-13114418	0.000634674	retrotransposon_protein,_putative,_Ty3-gypsy_subclass,_expressed
LOC_Os10g35500	10-18994611	0.00064524	epoxide_hydrolase,_putative,_expressed
LOC_Os01g29804	1-16697127	0.000649009	expressed_protein
LOC_Os05g30170	5-17487608	0.000649307	transposon_protein,_putative,_unclassified,_expressed
LOC_Os01g60140	1-34788864	0.000649373	ATCHX15,_putative,_expressed
LOC_Os11g23210	11-13362426	0.000649395	expressed_protein
LOC_Os03g11874	3-6220659	0.000653317	expressed_protein
LOC_Os01g72400	1-41995140	0.000653594	retrotransposon_protein,_putative,_Ty1-copia_subclass,_expressed
LOC_Os12g27010	12-15817595	0.000658298	transposon_protein,_putative,_CACTA,_En/Spm_sub-class,_expressed
LOC_Os02g15270	2-8536390	0.000664236	tyrosine-protein_phosphatase_YVH1,_putative,_expressed
LOC_Os01g29050	1-16264025	0.000666012	retrotransposon_protein,_putative,_unclassified,_expressed
LOC_Os03g38570	3-21403921	0.000667124	retrotransposon_protein,_putative,_unclassified,_expressed
LOC_Os12g01780	12-474230	0.000670605	retrotransposon_protein,_putative,_Ty1-copia_subclass,_expressed
LOC_Os11g23010	11-13233199	0.000671412	transposon_protein,_putative,_CACTA,_En/Spm_sub-class,_expressed
LOC_Os11g40600	11-24227199	0.000673021	expressed_protein
LOC_Os02g15250	2-8516943	0.000679908	late_embryogenesis_abundant_domain-containing_protein,_putative,_expressed
LOC_Os06g22970	6-13413661	0.00068059	expressed_protein
LOC_Os01g49410	1-28418354	0.000682954	expressed_protein
LOC_Os11g15755	11-8926653	0.000688052	transposon_protein,_putative,_unclassified,_expressed
LOC_Os02g15360	2-8597257	0.000694326	expressed_protein
LOC_Os04g04860	4-2343028	0.000696734	retrotransposon_protein,_putative,_Ty3-gypsy_subclass,_expressed
LOC_Os09g03620	9-1804474	0.000698648	wall-associated_receptor_kinase-like_20_precursor,_putative,_expressed
LOC_Os10g36060	10-19277322	0.000700142	protein_transport_protein-related,_putative,_expressed
LOC_Os12g04840	12-2079420	0.000703468	retrotransposon_protein,_putative,_unclassified,_expressed
LOC_Os03g21060	3-11976134	0.000709751	No_apical_meristem_protein,_putative,_expressed
LOC_Os11g29420	11-17080730	0.000715052	LTPL30_-_Protease_inhibitor/seed_storage/LTP_family_protein_precursor,_putative,_expressed
LOC_Os06g06280	6-2902309	0.000717967	galactosyltransferase_family_protein,_putative,_expressed
LOC_Os07g17790	7-10522853	0.000727564	retrotransposon_protein,_putative,_Ty3-gypsy_subclass
LOC_Os12g21624	12-12152012	0.000728008	retrotransposon_protein,_putative,_unclassified,_expressed
LOC_Os01g48970	1-28109883	0.000730117	hypothetical_protein
LOC_Os11g02379	11-699837	0.000730821	LTPL6_-_Protease_inhibitor/seed_storage/LTP_family_protein_precursor,_expressed
LOC_Os06g11730	6-6209024	0.000739312	RNA_recognition_motif_containing_protein,_putative,_expressed
LOC_Os10g28370	10-14764576	0.000746281	chlorophyllase-2,_chloroplast_precursor,_putative,_expressed
LOC_Os07g14410	7-8229611	0.00074936	retrotransposon_protein,_putative,_Ty1-copia_subclass,_expressed
LOC_Os06g03800	6-1521618	0.000751611	pollen_ankyrin,_putative,_expressed
LOC_Os06g27520	6-15585711	0.00075338	hypothetical_protein
LOC_Os04g52780	4-31421680	0.00075425	leucine-rich_repeat_receptor_protein_kinase_EXS_precursor,_putative,_expressed
LOC_Os07g43610	7-26106766	0.000759227	hypothetical_protein
LOC_Os09g13760	9-8064309	0.000765663	retrotransposon_protein,_putative,_unclassified
LOC_Os02g15120	2-8422812	0.000767256	RING-H2_finger_protein,_putative,_expressed
LOC_Os06g47620	6-28836823	0.00076794	peptidase,_putative,_expressed
LOC_Os09g04200	9-2207520	0.000772644	transposon_protein,_putative,_CACTA,_En/Spm_sub-class
LOC_Os08g19920	8-11929721	0.000773376	retrotransposon_protein,_putative,_Ty3-gypsy_subclass,_expressed
LOC_Os08g44610	8-28056487	0.000779098	expressed_protein
LOC_Os05g24730	5-14334122	0.000787692	retrotransposon_protein,_putative,_unclassified
LOC_Os01g49830	1-28619643	0.000791211	B3_DNA_binding_domain_containing_protein,_expressed
LOC_Os05g15970	5-9016394	0.000801367	retrotransposon_protein,_putative,_Ty3-gypsy_subclass,_expressed
LOC_Os03g55660	3-31690032	0.000801607	nucleoporin,_putative,_expressed
LOC_Os11g23750	11-13428528	0.000802426	retrotransposon_protein,_putative,_Ty1-copia_subclass,_expressed
LOC_Os05g19240	5-11173542	0.000802788	retrotransposon_protein,_putative,_Ty1-copia_subclass,_expressed
LOC_Os08g08450	8-4869958	0.000804744	retrotransposon_protein,_putative,_Ty3-gypsy_subclass,_expressed
LOC_Os01g52304	1-30062994	0.000808653	NB-ARC_domain_containing_protein,_expressed
LOC_Os01g60130	1-34785730	0.000811336	expressed_protein
LOC_Os01g50400	1-28934801	0.000812443	STE_MEKK_ste11_MAP3K.5_-_STE_kinases_include_homologs_to_sterile_7,_sterile_11_and_sterile_20_from_yeast,_expressed
LOC_Os10g34650	10-18464319	0.000812657	retrotransposon_protein,_putative,_unclassified,_expressed
LOC_Os09g13790	9-8081537	0.000813439	retrotransposon_protein,_putative,_Ty1-copia_subclass,_expressed
LOC_Os03g33690	3-19268522	0.000814114	retrotransposon_protein,_putative,_unclassified,_expressed
LOC_Os09g03120	9-1490556	0.00081418	expressed_protein
LOC_Os07g15540	7-9008222	0.000815117	ethylene_receptor,_putative,_expressed
LOC_Os06g03670	6-1434806	0.000817892	dehydration-responsive_element-binding_protein,_putative,_expressed
LOC_Os02g23980	2-13905061	0.00082438	retrotransposon_protein,_putative,_unclassified,_expressed
LOC_Os01g21110	1-11780379	0.000827534	expressed_protein
LOC_Os05g22314	5-12630163	0.000832618	retrotransposon_protein,_putative,_unclassified,_expressed
LOC_Os10g02420	10-884695	0.000836505	retrotransposon_protein,_putative,_unclassified,_expressed
LOC_Os09g03750	9-1892687	0.000841029	ankyrin,_putative,_expressed
LOC_Os06g36190	6-21200413	0.000844431	retrotransposon_protein,_putative,_Ty3-gypsy_subclass,_expressed
LOC_Os04g08460	4-4558312	0.000844949	OsFBX115_-_F-box_domain_containing_protein,_expressed
LOC_Os08g22760	8-13682247	0.000850121	retrotransposon_protein,_putative,_Ty3-gypsy_subclass,_expressed
LOC_Os09g02900	9-1357492	0.000850389	transposon_protein,_putative,_unclassified
LOC_Os04g21400	4-12091506	0.000851411	retrotransposon_protein,_putative,_Ty3-gypsy_subclass,_expressed
LOC_Os05g18230	5-10481148	0.000855235	retrotransposon_protein,_putative,_Ty3-gypsy_subclass,_expressed
LOC_Os03g46810	3-26475613	0.000856937	retrotransposon_protein,_putative,_Ty1-copia_subclass,_expressed
LOC_Os01g59510	1-34413281	0.000859705	chloroplast_ribonuclease_III_domain_protein,_putative,_expressed
LOC_Os09g04740	9-2523312	0.000860094	retrotransposon_protein,_putative,_Ty3-gypsy_subclass,_expressed
LOC_Os08g44620	8-28059586	0.000861458	zinc-binding_protein,_putative,_expressed
LOC_Os04g01354	4-258995	0.000863631	chalcone_synthase,_putative,_expressed
LOC_Os03g06000	3-2999019	0.000864016	expansin_precursor,_putative,_expressed
LOC_Os04g52760	4-31412339	0.000865731	gamma-soluble_NSF_attachment_protein,_putative,_expressed
LOC_Os09g03690	9-1862132	0.000866356	expressed_protein
LOC_Os08g29030	8-17775790	0.000867029	expressed_protein
LOC_Os01g61510	1-35587308	0.000869891	ammonium_transporter_protein,_putative,_expressed
LOC_Os07g47970	7-28654384	0.000872882	expressed_protein
LOC_Os08g40190	8-25436086	0.000878365	expressed_protein
LOC_Os03g20050	3-11298941	0.000880051	retrotransposon_protein,_putative,_unclassified,_expressed
LOC_Os07g13550	7-7765137	0.000881842	expressed_protein
LOC_Os08g44550	8-28011886	0.000890618	expressed_protein
LOC_Os06g14300	6-7980389	0.000891138	transposon_protein,_putative,_unclassified
LOC_Os02g15130	2-8429024	0.000892365	expressed_protein
LOC_Os02g25090	2-14567209	0.000896219	retrotransposon_protein,_putative,_Ty3-gypsy_subclass,_expressed
LOC_Os03g03550	3-1551833	0.00089776	bZIP_family_transcription_factor,_putative,_expressed
LOC_Os01g49780	1-28589985	0.000912933	hypothetical_protein
LOC_Os01g59530	1-34421125	0.000920111	OsCML1_-_Calmodulin-related_calcium_sensor_protein,_expressed
LOC_Os05g48200	5-27633674	0.000926813	glutamate_synthase,_chloroplast_precursor,_putative,_expressed
LOC_Os01g56110	1-32304992	0.000927521	RNA_recognition_motif_containing_protein,_putative,_expressed
LOC_Os06g44290	6-26730587	0.000931599	retrotransposon_protein,_putative,_Ty1-copia_subclass,_expressed
LOC_Os10g40180	10-21508456	0.000932017	retrotransposon_protein,_putative,_unclassified,_expressed
LOC_Os01g49860	1-28629625	0.000935608	conserved_hypothetical_protein
LOC_Os04g10420	4-5662855	0.000936928	CW7,_putative,_expressed
LOC_Os01g50480	1-28984580	0.000938027	SAM_dependent_carboxyl_methyltransferase,_putative,_expressed
LOC_Os06g03676	6-1438790	0.000945224	CAMK_CAMK_like.6_-_CAMK_includes_calcium/calmodulin_depedent_protein_kinases,_expressed
LOC_Os04g06520	4-3410985	0.000946923	expressed_protein
LOC_Os07g34140	7-20420816	0.000952328	chalcone_synthase,_putative,_expressed
LOC_Os03g05560	3-2772184	0.000954655	zinc_finger,_C3HC4_type_domain_containing_protein,_expressed
LOC_Os02g29260	2-17383810	0.000954902	retrotransposon_protein,_putative,_unclassified,_expressed
LOC_Os06g24200	6-14176500	0.000957346	transposon_protein,_putative,_CACTA,_En/Spm_sub-class,_expressed
LOC_Os06g11110	6-5822122	0.000962977	transposon_protein,_putative,_unclassified,_expressed
LOC_Os01g48780	1-27979175	0.000971578	expressed_protein
LOC_Os09g23690	9-14086151	0.000972384	UBX_domain_containing_protein,_expressed
LOC_Os01g12150	1-6618254	0.000972826	expressed_protein
LOC_Os11g16950	11-9405848	0.000981921	transposon_protein,_putative,_CACTA,_En/Spm_sub-class,_expressed
LOC_Os01g55510	1-31982168	0.00098266	dynein_light_chain_type_1_domain_containing_protein,_expressed
LOC_Os01g55520	1-31986707	0.00098266	ATROPGEF7/ROPGEF7,_putative,_expressed
LOC_Os09g18070	9-11075996	0.000985492	conserved_hypothetical_protein
LOC_Os08g13550	8-8053962	0.00099316	retrotransposon_protein,_putative,_Ty3-gypsy_subclass
LOC_Os09g39820	9-22833012	0.000995648	retrotransposon_protein,_putative,_unclassified,_expressed
LOC_Os08g06280	8-3463151	0.000996115	LSD1_zinc_finger_domain_containing_protein,_expressed
LOC_Os06g29580	6-16950372	0.00100515	retrotransposon_protein,_putative,_Ty3-gypsy_subclass,_expressed
LOC_Os03g15190	3-8310170	0.0010054	expressed_protein
LOC_Os01g50630	1-29083088	0.00100651	hypothetical_protein
LOC_Os03g33680	3-19263420	0.00100722	retrotransposon_protein,_putative,_Ty3-gypsy_subclass,_expressed
LOC_Os01g05470	1-2579611	0.001008	transcription_factor_X1,_putative,_expressed
LOC_Os10g11672	10-6442958	0.00100971	retrotransposon_protein,_putative,_Ty3-gypsy_subclass,_expressed
LOC_Os01g48750	1-27960735	0.00101462	aspartic_proteinase_nepenthesin-2_precursor,_putative,_expressed
LOC_Os01g05480	1-2587522	0.00101719	expressed_protein
LOC_Os08g03870	8-1845713	0.00101892	2-aminoethanethiol_dioxygenase,_putative,_expressed
LOC_Os01g68524	1-39816557	0.00102118	pentatricopeptide,_putative,_expressed
LOC_Os10g40324	10-21611905	0.00102403	expressed_protein
LOC_Os02g15200	2-8479340	0.00102591	expressed_protein
LOC_Os06g03650	6-1421717	0.00102823	expressed_protein
LOC_Os01g48710	1-27930608	0.00103305	heavy_metal-associated_domain_containing_protein,_expressed
LOC_Os05g20630	5-12101865	0.00103498	retrotransposon_protein,_putative,_unclassified,_expressed
LOC_Os01g55870	1-32174151	0.00103959	chorismate_mutase,_chloroplast_precursor,_putative,_expressed
LOC_Os08g17350	8-10613260	0.00104275	expressed_protein
LOC_Os04g52770	4-31416547	0.00104394	helix-loop-helix_DNA-binding_domain_containing_protein,_expressed
LOC_Os10g06090	10-3096884	0.00104662	OsWAK104_-_OsWAK_receptor-like_protein_kinase,_expressed
LOC_Os10g42460	10-22893073	0.00104906	retrotransposon_protein,_putative,_Ty3-gypsy_subclass,_expressed
LOC_Os08g21790	8-13044470	0.00105111	retrotransposon_protein,_putative,_unclassified,_expressed
LOC_Os02g15160	2-8453946	0.00105379	OsFBX40_-_F-box_domain_containing_protein,_expressed
LOC_Os09g14480	9-8558269	0.00105565	transposon_protein,_putative,_CACTA,_En/Spm_sub-class,_expressed
LOC_Os03g26890	3-15355640	0.00106153	retrotransposon_protein,_putative,_Ty3-gypsy_subclass,_expressed
LOC_Os06g03240	6-1223415	0.00106414	expressed_protein
LOC_Os09g37840	9-21809219	0.00106509	carbohydrate_binding_protein,_putative,_expressed
LOC_Os03g29270	3-16661090	0.0010721	expressed_protein
LOC_Os07g14680	7-8365221	0.00107446	expressed_protein
LOC_Os12g35130	12-21379241	0.00108422	retrotransposon_protein,_putative,_Ty3-gypsy_subclass,_expressed
LOC_Os03g05806	3-2905487	0.00108519	pseudouridine_synthase_family_protein,_putative,_expressed
LOC_Os02g47400	2-28936488	0.0010864	pectinacetylesterase_domain_containing_protein,_expressed
LOC_Os02g47330	2-28901858	0.00108956	expressed_protein
LOC_Os03g03810	3-1714698	0.00109168	DEF8_-_Defensin_and_Defensin-like_DEFL_family,_expressed
LOC_Os07g23370	7-13174994	0.00109246	retrotransposon_protein,_putative,_unclassified,_expressed
LOC_Os12g01200	12-118608	0.00109368	senescence-induced_receptor-like_serine/threonine-protein_kinase_precursor,_putative,_expressed
LOC_Os09g23725	9-14102439	0.00109538	expressed_protein
LOC_Os11g16540	11-9157483	0.00109716	tetratricopeptide_repeat_domain_containing_protein,_expressed
LOC_Os11g16570	11-9185064	0.00109716	expressed_protein
LOC_Os10g29010	10-15119687	0.00109984	transposon_protein,_putative,_CACTA,_En/Spm_sub-class,_expressed
LOC_Os03g03540	3-1529798	0.00110214	no_apical_meristem_protein,_putative,_expressed
LOC_Os01g55710	1-32083057	0.00110578	DNA-binding_protein,_putative,_expressed
LOC_Os03g43160	3-24082637	0.00110774	retrotransposon_protein,_putative,_Ty3-gypsy_subclass,_expressed
LOC_Os01g50420	1-28946060	0.00110872	STE_MEKK_ste11_MAP3K.7_-_STE_kinases_include_homologs_to_sterile_7,_sterile_11_and_sterile_20_from_yeast,_expressed
LOC_Os03g03980	3-1815533	0.00111006	coiled-coil_domain-containing_protein_124,_putative,_expressed
LOC_Os02g05600	2-2722459	0.00111205	expressed_protein
LOC_Os04g56570	4-33733839	0.00111297	heavy_metal-associated_domain_containing_protein,_expressed
LOC_Os08g35880	8-22634733	0.00111679	OsFBX294_-_F-box_domain_containing_protein,_expressed
LOC_Os05g31630	5-18422633	0.00112603	transposon_protein,_putative,_unclassified,_expressed
LOC_Os11g27580	11-15884259	0.00112791	retrotransposon_protein,_putative,_unclassified
LOC_Os02g22000	2-13083177	0.00112838	phosphoglycerate_mutase,_putative,_expressed
LOC_Os11g19390	11-11154734	0.00112937	retrotransposon_protein,_putative,_unclassified,_expressed
LOC_Os05g16470	5-9352193	0.00113045	retrotransposon_protein,_putative,_unclassified,_expressed
LOC_Os02g14980	2-8358787	0.00113946	calcium-binding_EF_hand_family_protein,_putative,_expressed
LOC_Os02g05340	2-2563909	0.00114635	proteasome/cyclosome_repeat_containing_protein,_expressed
LOC_Os01g19650	1-11147490	0.00114816	retrotransposon_protein,_putative,_Ty3-gypsy_subclass,_expressed
LOC_Os02g24730	2-14345271	0.00114964	retrotransposon_protein,_putative,_unclassified,_expressed
LOC_Os02g47380	2-28925078	0.00115059	retrotransposon_protein,_putative,_unclassified,_expressed
LOC_Os02g25370	2-14790128	0.00115267	transposon_protein,_putative,_CACTA,_En/Spm_sub-class,_expressed
LOC_Os02g41702	2-25038968	0.00115503	retrotransposon_protein,_putative,_unclassified,_expressed
LOC_Os08g33040	8-20513270	0.00115817	retrotransposon_protein,_putative,_unclassified,_expressed
LOC_Os10g23970	10-12288089	0.00116199	transposon_protein,_putative,_CACTA,_En/Spm_sub-class
LOC_Os04g07960	4-4239319	0.00116215	retrotransposon,_putative,_centromere-specific
LOC_Os09g32350	9-19321740	0.00116241	expressed_protein
LOC_Os11g16590	11-9194501	0.00116725	ATP-dependent_Clp_protease_ATP-binding_subunit_clpA_homolog_CD4B,chloroplast_precursor,_putative,_expressed
LOC_Os08g27040	8-16519517	0.00116833	lipid_phosphatase_protein,_putative,_expressed
LOC_Os11g30020	11-17463078	0.00117952	retrotransposon_protein,_putative,_Ty1-copia_subclass,_expressed
LOC_Os08g28040	8-17079462	0.00118015	retrotransposon_protein,_putative,_Ty1-copia_subclass,_expressed
LOC_Os08g23610	8-14291069	0.00118254	retrotransposon,_putative,_centromere-specific,_expressed
LOC_Os11g35510	11-20809054	0.00118653	retrotransposon_protein,_putative,_unclassified
LOC_Os07g17810	7-10539384	0.00119059	retrotransposon_protein,_putative,_Ty3-gypsy_subclass,_expressed
LOC_Os09g30020	9-18263751	0.00119411	retrotransposon_protein,_putative,_unclassified,_expressed
LOC_Os02g19430	2-11352646	0.00119447	expressed_protein
LOC_Os02g15140	2-8433462	0.00119665	retrotransposon_protein,_putative,_unclassified,_expressed
LOC_Os02g15150	2-8446610	0.00119665	glutelin,_putative,_expressed
LOC_Os02g15178	2-8460584	0.00119665	glutelin,_putative,_expressed
LOC_Os02g15190	2-8470297	0.00119665	retrotransposon_protein,_putative,_unclassified,_expressed
LOC_Os02g21810	2-12971062	0.00120086	cytochrome_P450_51,_putative,_expressed
LOC_Os04g15740	4-8555687	0.00120182	DEFL50_-_Defensin_and_Defensin-like_DEFL_family,_expressed
LOC_Os02g26870	2-15781809	0.0012032	retrotransposon_protein,_putative,_Ty1-copia_subclass
LOC_Os10g02750	10-1083521	0.00120436	Ser/Thr_protein_phosphatase_family_protein,_putative,_expressed
LOC_Os06g03850	6-1548068	0.00121324	impaired_sucrose_induction_1,_putative,_expressed
LOC_Os02g19924	2-11724736	0.00121641	aminotransferase,_classes_I_and_II,_domain_containing_protein,_expressed
LOC_Os01g10120	1-5281349	0.00121954	retrotransposon_protein,_putative,_Ty3-gypsy_subclass
LOC_Os08g45170	8-28357126	0.00122457	carboxyl-terminal_peptidase,_putative,_expressed
LOC_Os05g15750	5-8892827	0.00122471	transposon_protein,_putative,_CACTA,_En/Spm_sub-class,_expressed
LOC_Os01g01880	1-482934	0.00122621	expressed_protein
LOC_Os08g44660	8-28079001	0.0012275	EF_hand_family_protein,_putative,_expressed
LOC_Os09g32570	9-19443899	0.00122817	alcohol_dehydrogenase_GroES-like_domain_containing_protein,_expressed
LOC_Os09g07240	9-3549640	0.00122856	retrotransposon_protein,_putative,_Ty3-gypsy_subclass,_expressed
LOC_Os02g17900	2-10365299	0.00123752	glycosyl_hydrolases_family_16,_putative,_expressed
LOC_Os12g16170	12-9237237	0.00123902	retrotransposon_protein,_putative,_unclassified,_expressed
LOC_Os04g10620	4-5765378	0.00124052	retrotransposon_protein,_putative,_Ty3-gypsy_subclass
LOC_Os01g49420	1-28423542	0.00124138	retrotransposon_protein,_putative,_unclassified,_expressed
LOC_Os08g14670	8-8826460	0.00124333	transposon_protein,_putative,_CACTA,_En/Spm_sub-class,_expressed
LOC_Os11g23244	11-13405889	0.00124497	retrotransposon_protein,_putative,_Ty3-gypsy_subclass,_expressed
LOC_Os05g14170	5-7929204	0.00124632	expressed_protein
LOC_Os04g44730	4-26500142	0.00124632	lanC-like_protein_2,_putative,_expressed
LOC_Os09g10540	9-5748581	0.00124647	retrotransposon_protein,_putative,_Ty3-gypsy_subclass,_expressed
LOC_Os02g50730	2-30981824	0.00124836	metalloendoproteinase_1_precursor,_putative,_expressed
LOC_Os10g24760	10-12733978	0.0012516	retrotransposon_protein,_putative,_Ty3-gypsy_subclass,_expressed
LOC_Os11g22850	11-13148170	0.00125258	retrotransposon_protein,_putative,_Ty3-gypsy_subclass,_expressed
LOC_Os01g05460	1-2576087	0.00125966	expressed_protein
LOC_Os02g16950	2-9664630	0.00126558	retrotransposon_protein,_putative,_unclassified,_expressed
LOC_Os05g27800	5-16202869	0.00127354	expressed_protein
LOC_Os02g47320	2-28900501	0.00127427	vacuolar_ATPase_G_subunit,_putative,_expressed
LOC_Os01g56100	1-32300358	0.00128022	BSD_domain_containing_protein,_expressed
LOC_Os01g50600	1-29049543	0.00128134	expressed_protein
LOC_Os06g36640	6-21529936	0.00128225	transposon_protein,_putative,_CACTA,_En/Spm_sub-class,_expressed
LOC_Os10g26710	10-13942301	0.00128448	expressed_protein
LOC_Os10g39640	10-21179724	0.00128467	expansin_precursor,_putative,_expressed
LOC_Os02g52950	2-32380857	0.00128608	expressed_protein
LOC_Os01g52214	1-30022312	0.00129219	ubiquinone_oxidoreductase,_putative,_expressed
LOC_Os09g03130	9-1496108	0.00129531	hypothetical_protein
LOC_Os12g09420	12-4934989	0.00129722	transposon_protein,_putative,_CACTA,_En/Spm_sub-class
LOC_Os04g57770	4-34407854	0.00129775	expressed_protein
LOC_Os11g18520	11-10439654	0.00130424	transposon_protein,_putative,_CACTA,_En/Spm_sub-class
LOC_Os05g33530	5-19697916	0.00130499	expressed_protein
LOC_Os10g42780	10-23077360	0.00130783	lrgB-like_family_protein,_expressed
LOC_Os01g50490	1-28991240	0.00131104	cytochrome_P450,_putative,_expressed
LOC_Os01g07090	1-3335107	0.00131232	5-azacytidine_resistance_protein_azr1,_putative,_expressed
LOC_Os08g18110	8-11102794	0.00131742	alpha-soluble_NSF_attachment_protein,_putative,_expressed
LOC_Os03g36860	3-20453079	0.00132028	retrotransposon_protein,_putative,_unclassified,_expressed
LOC_Os03g56120	3-31974132	0.00132146	expressed_protein
LOC_Os03g30334	3-17305895	0.00132417	expressed_protein
LOC_Os01g74650	1-43238194	0.00132704	cysteine_synthase,_mitochondrial_precursor,_putative,_expressed
LOC_Os02g15090	2-8406590	0.0013302	glutelin,_putative,_expressed
LOC_Os03g33220	3-18994962	0.001331	retrotransposon_protein,_putative,_unclassified,_expressed
LOC_Os09g31190	9-18754914	0.00133211	slowmo_homolog,_putative,_expressed
LOC_Os09g30970	9-18654818	0.00133212	retrotransposon_protein,_putative,_Ty3-gypsy_subclass,_expressed
LOC_Os08g10790	8-6355411	0.00133552	retrotransposon_protein,_putative,_Ty3-gypsy_subclass
LOC_Os01g55400	1-31917913	0.0013399	expressed_protein
LOC_Os06g03570	6-1377528	0.00134013	pentatricopeptide,_putative,_expressed
LOC_Os01g25386	1-14351153	0.00134036	multidrug_resistance-associated_protein,_putative,_expressed
LOC_Os09g34990	9-20386570	0.00134408	uncharacterized_membrane_protein,_putative,_expressed
LOC_Os06g35270	6-20564069	0.00134889	retrotransposon_protein,_putative,_Ty3-gypsy_subclass,_expressed
LOC_Os09g29000	9-17626864	0.00135353	retrotransposon_protein,_putative,_Ty3-gypsy_subclass
LOC_Os06g06000	6-2760306	0.00135478	expressed_protein
LOC_Os02g22710	2-13530088	0.00135596	expressed_protein
LOC_Os02g47290	2-28875234	0.00135714	hypothetical_protein
LOC_Os06g03530	6-1366495	0.00135816	pentatricopeptide,_putative,_expressed
LOC_Os06g03540	6-1366495	0.00135816	oligopeptide_transporter,_putative,_expressed
LOC_Os06g03560	6-1371922	0.00135816	oligopeptide_transporter,_putative,_expressed
LOC_Os06g03660	6-1423935	0.00135816	peroxisomal_biogenesis_factor_11,_putative,_expressed
LOC_Os06g03682	6-1445653	0.00135816	calcium-dependent_protein_kinase_isoform_AK1,_putative,_expressed
LOC_Os06g03260	6-1244985	0.00135963	retrotransposon_protein,_putative,_unclassified,_expressed
LOC_Os02g05260	2-2528272	0.00136276	retrotransposon_protein,_putative,_unclassified,_expressed
LOC_Os01g44140	1-25302185	0.00136404	expressed_protein
LOC_Os02g36020	2-21644874	0.00136456	transposon_protein,_putative,_CACTA,_En/Spm_sub-class,_expressed
LOC_Os01g50430	1-28952569	0.00136662	expressed_protein
LOC_Os01g50440	1-28956726	0.00136662	AWPM-19-like_membrane_family_protein,_putative,_expressed
LOC_Os02g21850	2-12994213	0.00136831	hypothetical_protein
LOC_Os09g26190	9-15796779	0.00137085	CBS_domain_containing_protein,_expressed
LOC_Os03g03590	3-1568573	0.00137132	transporter,_monovalent_cation:proton_antiporter-2_family,_putative,_expressed
LOC_Os01g67570	1-39273804	0.0013755	PDE312/PTAC10,_putative,_expressed
LOC_Os06g29150	6-16633188	0.00137875	retrotransposon_protein,_putative,_unclassified,_expressed
LOC_Os11g08000	11-4160782	0.00138072	hypothetical_protein
LOC_Os04g05560	4-2810144	0.00138706	kinase,_putative,_expressed
LOC_Os02g17200	2-9853596	0.00138736	expressed_protein
LOC_Os01g38140	1-21364904	0.00139319	retrotransposon_protein,_putative,_unclassified,_expressed
LOC_Os04g54780	4-32570217	0.00139362	retrotransposon_protein,_putative,_Ty3-gypsy_subclass,_expressed
LOC_Os09g29890	9-18177239	0.00139518	phosphatidylinositol_3-_and_4-kinase_family_protein,_putative,_expressed
LOC_Os05g34440	5-20404330	0.00139579	transposon_protein,_putative,_CACTA,_En/Spm_sub-class,_expressed
LOC_Os03g63410	3-35826365	0.00139606	elongation_factor_Tu,_putative,_expressed
LOC_Os07g23700	7-13376152	0.00139723	retrotransposon_protein,_putative,_unclassified,_expressed
LOC_Os11g35690	11-20926740	0.00140471	retrotransposon_protein,_putative,_unclassified,_expressed
LOC_Os06g39060	6-23187347	0.00140532	glucan_endo-1,3-beta-glucosidase_precursor,_putative,_expressed
LOC_Os12g35910	12-21882163	0.00140584	expressed_protein
LOC_Os08g44690	8-28085335	0.00141094	transposon_protein,_putative,_Pong_sub-class,_expressed
LOC_Os08g44510	8-27994275	0.00141367	UDP-N-acetylglucosamine--peptide_N-acetylglucosaminyltransferase_SPINDLY,_putative,_expressed
LOC_Os08g44600	8-28046805	0.00141367	retrotransposon_protein,_putative,_unclassified
LOC_Os08g44650	8-28075764	0.00141367	expressed_protein
LOC_Os05g24810	5-14383772	0.00141393	expressed_protein
LOC_Os03g63430	3-35834831	0.00141427	proteasome_subunit,_putative,_expressed
LOC_Os01g48790	1-27983981	0.00141761	YT521-B-like_family_domain_containing_protein,_expressed
LOC_Os08g24980	8-15145204	0.00142335	transposon_protein,_putative,_unclassified,_expressed
LOC_Os01g22170	1-12458703	0.00142366	retrotransposon_protein,_putative,_Ty3-gypsy_subclass,_expressed
LOC_Os10g35480	10-18986736	0.00142723	lanC-like_protein_2,_putative,_expressed
LOC_Os09g28970	9-17620729	0.00142869	retrotransposon_protein,_putative,_unclassified,_expressed
LOC_Os02g52580	2-32175905	0.00143034	retrotransposon_protein,_putative,_unclassified,_expressed
LOC_Os06g29410	6-16840172	0.00143159	transposon_protein,_putative,_CACTA,_En/Spm_sub-class
LOC_Os05g24640	5-14233391	0.00143225	retrotransposon_protein,_putative,_unclassified,_expressed
LOC_Os08g44590	8-28043471	0.00143582	gibberellin_20_oxidase_2,_putative,_expressed
LOC_Os03g45590	3-25727655	0.00143687	retrotransposon_protein,_putative,_unclassified
LOC_Os03g34140	3-19447757	0.0014369	retrotransposon_protein,_putative,_Ty1-copia_subclass
LOC_Os11g16530	11-9145609	0.00143758	mal,_putative,_expressed
LOC_Os02g51890	2-31783680	0.00143767	RNA_recognition_motif_containing_protein,_putative,_expressed
LOC_Os10g43020	10-23180068	0.00144169	retrotransposon_protein,_putative,_unclassified,_expressed
LOC_Os11g06780	11-3314320	0.00144252	serine/threonine-protein_kinase_BRI1-like_1_precursor,_putative,_expressed
LOC_Os01g60120	1-34777453	0.00144404	transmembrane_protein_56,_putative,_expressed
LOC_Os01g33840	1-18622577	0.00145147	heat_shock_protein_binding_protein,_putative,_expressed
LOC_Os10g13480	10-7282490	0.00146106	retrotransposon_protein,_putative,_Ty3-gypsy_subclass
LOC_Os09g03800	9-1925882	0.00146523	expressed_protein
LOC_Os08g44560	8-28015550	0.00146866	expressed_protein
LOC_Os09g13720	9-8028816	0.00147021	expressed_protein
LOC_Os01g31810	1-17428426	0.0014774	RNA_recognition_motif_containing_protein,_putative,_expressed
LOC_Os02g51290	2-31407966	0.00147817	HVA22,_putative,_expressed
LOC_Os03g03640	3-1610119	0.00148001	expressed_protein
LOC_Os03g38270	3-21243124	0.00148124	retrotransposon_protein,_putative,_unclassified,_expressed
LOC_Os05g42320	5-24753230	0.00148175	retrotransposon_protein,_putative,_unclassified,_expressed
LOC_Os03g46800	3-26473564	0.00148194	retrotransposon_protein,_putative,_Ty1-copia_subclass,_expressed
LOC_Os05g03770	5-1669175	0.00148686	expressed_protein
LOC_Os02g21720	2-12909883	0.00149391	transposon_protein,_putative,_CACTA,_En/Spm_sub-class,_expressed
LOC_Os02g21870	2-13003514	0.00149391	expressed_protein
LOC_Os02g21880	2-13008719	0.00149391	coiled-coil_domain-containing_protein,_putative,_expressed
LOC_Os02g22700	2-13522982	0.00149391	retrotransposon,_putative,_centromere-specific,_expressed
LOC_Os02g24430	2-14161416	0.00149391	expressed_protein
LOC_Os02g24690	2-14323410	0.00149391	retrotransposon_protein,_putative,_unclassified,_expressed
LOC_Os02g25760	2-15090352	0.00149391	retrotransposon_protein,_putative,_unclassified
LOC_Os02g26280	2-15429965	0.00149391	retrotransposon_protein,_putative,_unclassified,_expressed
LOC_Os08g22510	8-13558974	0.00149553	retrotransposon_protein,_putative,_Ty3-gypsy_subclass,_expressed
LOC_Os04g35070	4-21319661	0.00150156	expressed_protein
LOC_Os09g32360	9-19331280	0.00150596	gp176,_putative,_expressed
LOC_Os12g27490	12-16186452	0.00150844	retrotransposon_protein,_putative,_Ty3-gypsy_subclass,_expressed
LOC_Os03g03560	3-1553215	0.00150972	FHA_domain_containing_protein,_putative,_expressed
LOC_Os07g32670	7-19503707	0.00151078	expressed_protein
LOC_Os01g48580	1-27857979	0.0015139	ubiquitin-conjugating_enzyme_E2,_putative,_expressed
LOC_Os09g02630	9-1137787	0.00151557	retrotransposon_protein,_putative,_unclassified,_expressed
LOC_Os01g63750	1-36981471	0.00151697	glycine-rich_protein,_putative,_expressed
LOC_Os02g09440	2-4843096	0.00151753	expressed_protein
LOC_Os10g35604	10-19045265	0.0015176	expressed_protein
LOC_Os12g22145	12-12472865	0.00151769	expressed_protein
LOC_Os01g55180	1-31745565	0.00152277	expressed_protein
LOC_Os01g55280	1-31815933	0.00152277	expressed_protein
LOC_Os11g19300	11-11062183	0.00152414	transposon_protein,_putative,_Mutator_sub-class,_expressed
LOC_Os10g31864	10-16737522	0.00152673	expressed_protein
LOC_Os02g24370	2-14138725	0.00152678	retrotransposon_protein,_putative,_Ty3-gypsy_subclass
LOC_Os12g22520	12-12713406	0.00152981	retrotransposon_protein,_putative,_Ty3-gypsy_subclass,_expressed
LOC_Os05g46750	5-27067912	0.00152981	STE_MEKK_ste11_MAP3K.18_-_STE_kinases_include_homologs_to_sterile_7,_sterile_11_and_sterile_20_from_yeast,_expressed
LOC_Os01g07170	1-3388739	0.00153234	HORMA_domain_containing_protein,_putative,_expressed
LOC_Os09g32370	9-19334830	0.00153417	gp176,_putative,_expressed
LOC_Os05g47790	5-27385755	0.00153903	expressed_protein
LOC_Os04g02080	4-671614	0.00155258	retrotransposon_protein,_putative,_unclassified
LOC_Os12g22560	12-12735922	0.00155446	retrotransposon_protein,_putative,_Ty3-gypsy_subclass,_expressed
LOC_Os06g28270	6-16063639	0.00156494	glycerol_3-phosphate_permease,_putative
LOC_Os08g26544	8-16159143	0.00156592	expressed_protein
LOC_Os05g24720	5-14331478	0.00158062	retrotransposon_protein,_putative,_unclassified,_expressed
LOC_Os09g32440	9-19368251	0.00158429	endonuclease/exonuclease/phosphatase_family_domain_containing_protein,_expressed
LOC_Os11g06770	11-3308210	0.00158483	ethylene-responsive_transcription_factor_ERF110,_putative,_expressed
LOC_Os11g20554	11-11912342	0.00158648	ATP-dependent_RNA_helicase,_putative,_expressed
LOC_Os03g05910	3-2964090	0.00159606	expressed_protein
LOC_Os02g24890	2-14432353	0.00160657	retrotransposon_protein,_putative,_unclassified,_expressed
LOC_Os02g14730	2-8139530	0.00161301	ubiquitin_carboxyl-terminal_hydrolase_family_protein,_expressed
LOC_Os01g62210	1-36007846	0.00162024	50S_ribosomal_protein_L17,_putative,_expressed
LOC_Os12g43260	12-26851982	0.00162309	retrotransposon_protein,_putative,_unclassified,_expressed
LOC_Os02g15350	2-8590791	0.00162469	dof_zinc_finger_domain_containing_protein,_putative,_expressed
LOC_Os04g42750	4-25304166	0.00162792	retrotransposon_protein,_putative,_unclassified,_expressed
LOC_Os12g36850	12-22592221	0.00162878	pathogenesis-related_Bet_v_I_family_protein,_putative,_expressed
LOC_Os02g31280	2-18746801	0.00163643	expressed_protein
LOC_Os01g55120	1-31718524	0.00163718	expressed_protein
LOC_Os01g55130	1-31722274	0.00163718	expressed_protein
LOC_Os01g55150	1-31728972	0.00163718	bZIP_transcription_factor_domain_containing_protein,_expressed
LOC_Os09g20260	9-12146844	0.00163892	polyamine_oxidase_precursor,_putative,_expressed
LOC_Os06g49520	6-29995763	0.00164277	arogenate_dehydrogenase_1,_chloroplast_precursor,_putative,_expressed
LOC_Os04g51970	4-30854351	0.00164362	synaptic_vesicle_2-related_protein,_putative,_expressed
LOC_Os02g48370	2-29613112	0.00164548	ARID/BRIGHT_DNA-binding_domain-containing_protein,_putative,_expressed
LOC_Os03g15500	3-8514798	0.00164837	retrotransposon_protein,_putative,_unclassified
LOC_Os07g29030	7-17025343	0.00164865	hypothetical_protein
LOC_Os12g36030	12-22048825	0.00165103	expressed_protein
LOC_Os03g41790	3-23208120	0.00165495	retrotransposon,_putative,_centromere-specific,_expressed
LOC_Os06g24570	6-14404891	0.00165673	retrotransposon_protein,_putative,_unclassified,_expressed
LOC_Os02g24470	2-14176350	0.00165935	expressed_protein
LOC_Os08g06070	8-3313160	0.00166318	ELF7,_putative,_expressed
LOC_Os11g26370	11-15089489	0.00167039	retrotransposon_protein,_putative,_Ty3-gypsy_subclass,_expressed
LOC_Os01g46510	1-26463221	0.00167505	peptidase_S8_and_S53,_subtilisin,_kexin,_sedolisin,_putative,_expressed
LOC_Os06g12470	6-6770417	0.00167687	retrotransposon_protein,_putative,_Ty3-gypsy_subclass,_expressed
LOC_Os01g55250	1-31800292	0.00168087	expressed_protein
LOC_Os01g55260	1-31807628	0.00168087	AAA-type_ATPase_family_protein,_putative,_expressed
LOC_Os02g22374	2-13363964	0.00168425	expressed_protein
LOC_Os02g20310	2-11966394	0.00168812	expressed_protein
LOC_Os07g32660	7-19496675	0.00169301	monocopper_oxidase,_putative,_expressed
LOC_Os01g50670	1-29100667	0.00169451	retrotransposon_protein,_putative,_unclassified,_expressed
LOC_Os08g01610	8-364994	0.00169473	DUF250_domain_containing_protein,_putative,_expressed
LOC_Os09g07280	9-3578441	0.00169829	expressed_protein
LOC_Os01g49560	1-28503117	0.00170379	expressed_protein
LOC_Os04g53214	4-31693287	0.0017096	hydroxyacid_oxidase_1,_putative,_expressed
LOC_Os01g29860	1-16729794	0.00171071	expressed_protein
LOC_Os03g26010	3-14908100	0.00171131	retrotransposon_protein,_putative,_unclassified,_expressed
LOC_Os06g07850	6-3819284	0.00172763	retrotransposon_protein,_putative,_unclassified,_expressed
LOC_Os07g38800	7-23279292	0.0017298	lectin-like_receptor_kinase,_putative,_expressed
LOC_Os04g39530	4-23536375	0.00173033	transposon_protein,_putative,_CACTA,_En/Spm_sub-class,_expressed
LOC_Os02g15220	2-8490649	0.00173161	bromodomain_containing_protein,_expressed
LOC_Os01g48525	1-27827383	0.00173325	expressed_protein
LOC_Os09g28980	9-17622758	0.00173378	retrotransposon_protein,_putative,_unclassified,_expressed
LOC_Os11g29480	11-17106435	0.00173443	expressed_protein
LOC_Os11g29510	11-17117968	0.00173443	cysteine-rich_receptor-like_protein_kinase_35_precursor,_putative,_expressed
LOC_Os04g01080	4-64475	0.00173511	retrotransposon_protein,_putative,_unclassified
LOC_Os06g42810	6-25741255	0.00173539	UBA_and_UBX_domain-containing_protein,_putative,_expressed
LOC_Os09g10650	9-5801291	0.00173626	phosphatidylinositol-4-phosphate_5-Kinase_family_protein,_putative,_expressed
LOC_Os03g51770	3-29691583	0.00174084	retrotransposon_protein,_putative,_unclassified,_expressed
LOC_Os11g41920	11-25218927	0.00174968	expressed_protein
LOC_Os02g30210	2-17958790	0.00175223	OsFBK7_-_F-box_domain_and_kelch_repeat_containing_protein,_expressed
LOC_Os02g21750	2-12925996	0.00175668	MDR-like_ABC_transporter,_putative,_expressed
LOC_Os12g31640	12-19056604	0.00175674	vacuolar_protein_sorting-associated_protein_26,_putative,_expressed
LOC_Os11g29680	11-17203470	0.0017614	expressed_protein
LOC_Os02g15020	2-8380605	0.00176346	zinc_finger,_C3HC4_type_domain_containing_protein,_expressed
LOC_Os05g18200	5-10472413	0.00176751	retrotransposon_protein,_putative,_Ty3-gypsy_subclass,_expressed
LOC_Os04g56560	4-33730065	0.00176795	proton-dependent_oligopeptide_transport,_putative,_expressed
LOC_Os04g56590	4-33743381	0.00176795	ATP/GTP_binding_protein,_putative,_expressed
LOC_Os01g55270	1-31812631	0.00177795	SGS_domain_containing_protein,_expressed
LOC_Os08g17010	8-10423501	0.00178036	retrotransposon_protein,_putative,_unclassified,_expressed
LOC_Os10g13490	10-7291173	0.00178408	retrotransposon_protein,_putative,_unclassified,_expressed
LOC_Os05g41720	5-24410082	0.00178442	retrotransposon_protein,_putative,_unclassified,_expressed
LOC_Os06g29750	6-17083799	0.00178549	retrotransposon_protein,_putative,_Ty3-gypsy_subclass,_expressed
LOC_Os01g50849	1-29208602	0.00178623	expressed_protein
LOC_Os04g31860	4-19071501	0.00178746	retrotransposon_protein,_putative,_unclassified,_expressed
LOC_Os02g40110	2-24284118	0.00178889	expressed_protein
LOC_Os04g30210	4-18029581	0.00179689	OsFBL15_-_F-box_domain_and_LRR_containing_protein,_expressed
LOC_Os01g48810	1-28009033	0.00179754	transcription_initiation_factor_TFIID_subunit_11,_putative,_expressed
LOC_Os03g46780	3-26462246	0.00180524	expressed_protein
LOC_Os07g27170	7-15763234	0.00181043	retrotransposon_protein,_putative,_Ty3-gypsy_subclass,_expressed
LOC_Os04g11420	4-6240473	0.00181171	transposon_protein,_putative,_CACTA,_En/Spm_sub-class
LOC_Os03g21290	3-12178729	0.00181435	retrotransposon_protein,_putative,_Ty3-gypsy_subclass,_expressed
LOC_Os04g56580	4-33737722	0.00181804	inositol_1,3,4,5,6-pentakisphosphate_2-kinase,_putative,_expressed
LOC_Os09g13610	9-7915973	0.00181957	PFT1,_putative,_expressed
LOC_Os05g26110	5-15184818	0.00182283	transposon_protein,_putative,_Mutator_sub-class,_expressed
LOC_Os01g06730	1-3182206	0.00182372	verticillium_wilt_disease_resistance_protein,_putative,_expressed
LOC_Os05g27990	5-16338617	0.00182507	transposon_protein,_putative,_CACTA,_En/Spm_sub-class,_expressed
LOC_Os03g32550	3-18617300	0.00182515	retrotransposon_protein,_putative,_unclassified,_expressed
LOC_Os11g39900	11-23778668	0.00182806	retrotransposon_protein,_putative,_unclassified,_expressed
LOC_Os04g20370	4-11399580	0.00182876	transposon_protein,_putative,_CACTA,_En/Spm_sub-class,_expressed
LOC_Os01g55530	1-31992756	0.00182897	AP003256-AK101847_-_NBS/LRR_genes_that_are_S-rich,divergent_TIR,_divergent_NBS,_expressed
LOC_Os11g14760	11-8314750	0.00183671	retrotransposon_protein,_putative,_unclassified,_expressed
LOC_Os03g40580	3-22564652	0.00184851	retrotransposon_protein,_putative,_unclassified,_expressed
LOC_Os01g04409	1-1958695	0.00185168	OsWAK1_-_OsWAK_receptor-like_cytoplasmic_kinase_OsWAK-RLCK,_expressed
LOC_Os12g03880	12-1603800	0.00185617	60S_acidic_ribosomal_protein_P0,_putative,_expressed
LOC_Os01g04630	1-2075969	0.00185657	muconate_cycloisomerase,_putative,_expressed
LOC_Os03g03870	3-1753422	0.00185808	DNA-binding_bromodomain-containing_protein,_putative,_expressed
LOC_Os09g32270	9-19261528	0.0018591	expressed_protein
LOC_Os05g16810	5-9576859	0.00186144	retrotransposon_protein,_putative,_unclassified
LOC_Os02g08450	2-4550379	0.00186182	transposon_protein,_putative,_CACTA,_En/Spm_sub-class,_expressed
LOC_Os03g33740	3-19288546	0.00187376	retrotransposon_protein,_putative,_Ty3-gypsy_subclass,_expressed
LOC_Os05g28550	5-16724829	0.00187478	retrotransposon_protein,_putative,_Ty3-gypsy_subclass,_expressed
LOC_Os02g24300	2-14100881	0.00187845	transposon_protein,_putative,_CACTA,_En/Spm_sub-class
LOC_Os07g42560	7-25466366	0.00188057	expressed_protein
LOC_Os02g20570	2-12134970	0.00188539	retrotransposon_protein,_putative,_Ty1-copia_subclass,_expressed
LOC_Os05g49210	5-28239728	0.00188576	WRKY43,_expressed
LOC_Os11g11500	11-6393652	0.00188716	serpin_domain_containing_protein,_putative,_expressed
LOC_Os11g28104	11-16152869	0.00188784	TKL_IRAK_DUF26-lf.4_-_DUF26_kinases_have_homology_to_DUF26_containing_loci,_expressed
LOC_Os06g34520	6-20086403	0.00188994	CAF1_family_ribonuclease_containing_protein,_putative,_expressed
LOC_Os02g30200	2-17954229	0.00189846	PE-PGRS_family_protein,_putative,_expressed
LOC_Os03g40710	3-22639643	0.0018996	ZOS3-13_-_C2H2_zinc_finger_protein,_expressed
LOC_Os03g37430	3-20759323	0.00189997	retrotransposon_protein,_putative,_unclassified,_expressed
LOC_Os08g20870	8-12519557	0.00190359	retrotransposon_protein,_putative,_Ty3-gypsy_subclass,_expressed
LOC_Os08g28930	8-17688840	0.00190971	retrotransposon_protein,_putative,_unclassified,_expressed
LOC_Os05g06790	5-3546427	0.00191406	expressed_protein
LOC_Os04g22440	4-12708084	0.00191531	expressed_protein
LOC_Os05g02080	5-613884	0.00191862	expressed_protein
LOC_Os06g27940	6-15854286	0.00191928	retrotransposon_protein,_putative,_Ty3-gypsy_subclass
LOC_Os07g13700	7-7865727	0.00192133	retrotransposon_protein,_putative,_unclassified,_expressed
LOC_Os05g47470	5-27198562	0.00192376	VIP1_protein,_putative,_expressed
LOC_Os11g29690	11-17208317	0.00192516	oxidoreductase,_2OG-Fe_oxygenase_family_protein,_putative,_expressed
LOC_Os10g25920	10-13432261	0.00192789	transposon_protein,_putative,_CACTA,_En/Spm_sub-class
LOC_Os04g35050	4-21300146	0.00193253	retrotransposon_protein,_putative,_unclassified
LOC_Os12g29570	12-17624486	0.00193348	expressed_protein
LOC_Os07g30040	7-17707550	0.00194513	retrotransposon_protein,_putative,_unclassified,_expressed
LOC_Os11g41480	11-24884977	0.00195175	retrotransposon_protein,_putative,_Ty3-gypsy_subclass,_expressed
LOC_Os01g61100	1-35364208	0.00195279	transposon_protein,_putative,_unclassified,_expressed
LOC_Os04g33090	4-20035592	0.0019571	retrotransposon_protein,_putative,_unclassified,_expressed
LOC_Os02g03960	2-1696065	0.00195894	CPuORF1_-_conserved_peptide_uORF-containing_transcript,_expressed
LOC_Os01g48830	1-28015536	0.00196486	expressed_protein
LOC_Os11g29700	11-17210649	0.00197106	expressed_protein
LOC_Os10g42030	10-22596316	0.00197223	expressed_protein
LOC_Os07g36900	7-22095828	0.00197699	OsFBL39_-_F-box_domain_and_LRR_containing_protein,_expressed
LOC_Os08g07610	8-4270917	0.00197894	retrotransposon_protein,_putative,_Ty1-copia_subclass,_expressed
LOC_Os01g55790	1-32130513	0.00198175	expressed_protein
LOC_Os02g30880	2-18430813	0.001982	retrotransposon_protein,_putative,_unclassified,_expressed
LOC_Os01g68680	1-39882834	0.0019833	tetratricopeptide_repeat_domain_containing_protein,_expressed
LOC_Os01g55549	1-32007240	0.00198623	homeobox_and_START_domains_containing_protein,_putative,_expressed
LOC_Os01g55560	1-32010846	0.00198623	ABIL3,_putative,_expressed
LOC_Os01g55580	1-32017493	0.00198623	tesmin/TSO1-like_CXC_domain_containing_protein,_expressed
LOC_Os08g23010	8-13861091	0.0019888	retrotransposon_protein,_putative,_unclassified
LOC_Os01g68430	1-39769545	0.001989	transposon_protein,_putative,_unclassified
LOC_Os11g44940	11-27200677	0.00199369	seed_maturation_protein_PM27,_putative,_expressed
LOC_Os09g29070	9-17650527	0.00199487	glucose-6-phosphate_isomerase,_putative,_expressed
LOC_Os06g27480	6-15559313	0.00199994	retrotransposon_protein,_putative,_Ty3-gypsy_subclass,_expressed
LOC_Os05g47550	5-27239218	0.00200041	ANTH/ENTH_domain_containing_protein,_putative,_expressed
LOC_Os05g32090	5-18710776	0.00201291	expressed_protein
LOC_Os07g06870	7-3359025	0.00201384	hypothetical_protein
LOC_Os02g26250	2-15421019	0.00201916	retrotransposon_protein,_putative,_unclassified
LOC_Os07g41810	7-25045660	0.00201929	stress_responsive_A/B_Barrel_domain_containing_protein,_expressed
LOC_Os10g30070	10-15614664	0.00202261	sodium/calcium_exchanger_protein,_putative,_expressed
LOC_Os06g11550	6-6122862	0.00202613	retrotransposon_protein,_putative,_Ty3-gypsy_subclass
LOC_Os08g44540	8-28009635	0.00202633	expressed_protein
LOC_Os08g41440	8-26166883	0.00202936	UDP-glucuronate_4-epimerase,_putative,_expressed
LOC_Os08g04520	8-2233063	0.00203491	DEFL53_-_Defensin_and_Defensin-like_DEFL_family
LOC_Os01g06920	1-3282979	0.00203762	resistance_protein_SlVe1_precursor,_putative,_expressed
LOC_Os01g60780	1-35148743	0.00204072	solute_carrier_family_35_member_E3,_putative,_expressed
LOC_Os11g06740	11-3291451	0.00204087	syntaxin_6,_putative,_expressed
LOC_Os12g32120	12-19374245	0.0020479	transposon_protein,_putative,_CACTA,_En/Spm_sub-class,_expressed
LOC_Os07g12020	7-6709456	0.00205553	retrotransposon_protein,_putative,_unclassified,_expressed
LOC_Os02g24134	2-13985997	0.00205576	Sec1_family_transport_protein,_putative,_expressed
LOC_Os12g41450	12-25678316	0.0020558	F-box_domain_containing_protein,_expressed
LOC_Os01g48760	1-27963778	0.00205856	THAP_domain-containing_protein_4,_putative,_expressed
LOC_Os01g65360	1-37928263	0.00206049	expressed_protein
LOC_Os01g23580	1-13243583	0.00206141	inorganic_H+_pyrophosphatase,_putative,_expressed
LOC_Os02g18590	2-10840379	0.00206308	retrotransposon_protein,_putative,_Ty3-gypsy_subclass,_expressed
LOC_Os01g59480	1-34402220	0.00206528	expressed_protein
LOC_Os01g55060	1-31659775	0.00206806	expressed_protein
LOC_Os10g40770	10-21879165	0.0020687	expressed_protein
LOC_Os08g24280	8-14655290	0.00207258	transposon_protein,_putative,_CACTA,_En/Spm_sub-class,_expressed
LOC_Os06g19410	6-11059827	0.00207448	retrotransposon_protein,_putative,_unclassified,_expressed
LOC_Os05g27920	5-16289318	0.00207488	phox_domain-containing_protein,_putative,_expressed
LOC_Os02g47390	2-28929165	0.00207618	expressed_protein
LOC_Os06g03550	6-1370319	0.00207662	hypothetical_protein
LOC_Os01g55090	1-31672254	0.00207719	transposon_protein,_putative,_Mutator_sub-class,_expressed
LOC_Os12g17290	12-9894045	0.00208055	retrotransposon_protein,_putative,_Ty3-gypsy_subclass,_expressed
LOC_Os03g47720	3-27044736	0.00208165	ankyrin,_putative,_expressed
LOC_Os01g25090	1-14164504	0.00208856	transposon_protein,_putative,_CACTA,_En/Spm_sub-class,_expressed
LOC_Os11g15530	11-8803513	0.00208988	conserved_hypothetical_protein
LOC_Os09g28190	9-17106746	0.00209034	expressed_protein
LOC_Os08g10390	8-6098647	0.00209115	retrotransposon_protein,_putative,_unclassified
LOC_Os12g34180	12-20720700	0.00209617	retrotransposon_protein,_putative,_Ty3-gypsy_subclass,_expressed
LOC_Os01g71910	1-41668246	0.00209735	transposon_protein,_putative,_CACTA,_En/Spm_sub-class,_expressed
LOC_Os03g63420	3-35830530	0.00209844	OsGrx_S14_-_glutaredoxin_subgroup_II,_expressed
LOC_Os11g04720	11-2013542	0.00209941	OsRR10__type-A_response_regulator,_expressed
LOC_Os05g43480	5-25274482	0.00210042	ubiquitin_carboxyl-terminal_hydrolase_domain_containing_protein,_expressed
LOC_Os11g26080	11-14920737	0.00210099	transposon_protein,_putative,_CACTA,_En/Spm_sub-class,_expressed
LOC_Os09g10220	9-5569975	0.00210304	transposon_protein,_putative,_CACTA,_En/Spm_sub-class,_expressed
LOC_Os11g09530	11-5107804	0.00210606	retrotransposon_protein,_putative,_unclassified,_expressed
LOC_Os08g03930	8-1867988	0.00210671	retrotransposon_protein,_putative,_unclassified,_expressed
LOC_Os11g17610	11-9816182	0.00211195	expressed_protein
LOC_Os03g35520	3-19686021	0.0021146	retrotransposon_protein,_putative,_Ty3-gypsy_subclass
LOC_Os08g44670	8-28081617	0.00211547	calreticulin_precursor,_putative,_expressed
LOC_Os03g03800	3-1711733	0.00211556	expressed_protein
LOC_Os03g04350	3-2008585	0.00211653	expressed_protein
LOC_Os08g22410	8-13523483	0.00211806	retrotransposon_protein,_putative,_unclassified,_expressed
LOC_Os07g29220	7-17119416	0.00212028	Cyclopropane-fatty-acyl-phospholipid_synthase,_putative,_expressed
LOC_Os01g71130	1-41166381	0.00212049	xylanase_inhibitor_725OS,_putative,_expressed
LOC_Os02g39220	2-23695819	0.00212636	transposon_protein,_putative,_unclassified,_expressed
LOC_Os02g31310	2-18784267	0.00212658	retrotransposon_protein,_putative,_LINE_subclass,_expressed
LOC_Os09g07250	9-3558154	0.00214117	retrotransposon_protein,_putative,_unclassified,_expressed
LOC_Os10g40950	10-21994287	0.00214275	polyol_transporter_5,_putative,_expressed
LOC_Os05g24030	5-13852592	0.00214379	retrotransposon_protein,_putative,_unclassified,_expressed
LOC_Os02g02210	2-692678	0.00214535	aminotransferase,_putative,_expressed
LOC_Os03g27710	3-15885741	0.00215162	retrotransposon_protein,_putative,_unclassified,_expressed
LOC_Os04g24160	4-13815904	0.00215224	expressed_protein
LOC_Os12g29350	12-17425109	0.0021529	ATP_binding_protein,_putative,_expressed
LOC_Os01g51890	1-29830568	0.00215705	endonuclease/exonuclease/phosphatase_family_domain_containing_protein,_expressed
LOC_Os06g03486	6-1342748	0.00216106	expressed_protein
LOC_Os07g03170	7-1240343	0.00216171	expressed_protein
LOC_Os01g50470	1-28978989	0.00216214	regulator_of_chromosome_condensation,_putative,_expressed
LOC_Os11g14440	11-8106118	0.00216675	expressed_protein
LOC_Os06g47470	6-28752862	0.00217106	TKL_IRAK_DUF26-lh.2_-_DUF26_kinases_have_homology_to_DUF26_containing_loci,_expressed
LOC_Os01g63880	1-37066973	0.00217554	expressed_protein
LOC_Os01g16740	1-9509325	0.00217717	transposon_protein,_putative,_unclassified,_expressed
LOC_Os12g03730	12-1512598	0.00217797	zinc_finger_DHHC_domain-containing_protein,_putative,_expressed
LOC_Os06g19900	6-11387622	0.00218164	retrotransposon_protein,_putative,_unclassified,_expressed
LOC_Os01g49460	1-28444763	0.00218772	hypothetical_protein
LOC_Os03g06330	3-3167600	0.00218839	tyrosine_protein_kinase_domain_containing_protein,_putative,_expressed
LOC_Os03g20330	3-11498247	0.00218894	VQ_domain_containing_protein,_putative,_expressed
LOC_Os02g23840	2-13798595	0.00219169	retrotransposon_protein,_putative,_Ty3-gypsy_subclass,_expressed
LOC_Os05g46130	5-26760099	0.00219323	transposon_protein,_putative,_unclassified,_expressed
LOC_Os01g43210	1-24685447	0.00219826	retrotransposon_protein,_putative,_Ty1-copia_subclass,_expressed
LOC_Os11g20400	11-11810380	0.00219826	retrotransposon_protein,_putative,_unclassified,_expressed
LOC_Os08g21520	8-12822696	0.00220329	retrotransposon_protein,_putative,_unclassified
LOC_Os04g16180	4-8787346	0.002207	retrotransposon_protein,_putative,_unclassified
LOC_Os02g02050	2-573966	0.00220877	SNF2_family_N-terminal_domain_containing_protein,_expressed
LOC_Os08g03990	8-1916624	0.00221273	expressed_protein
LOC_Os07g08900	7-4630720	0.00221727	retrotransposon_protein,_putative,_unclassified,_expressed
LOC_Os03g46910	3-26528775	0.00221828	pyruvate_kinase,_putative,_expressed
LOC_Os01g59520	1-34417281	0.00221993	cupin,_RmlC-type,_putative,_expressed
LOC_Os01g50350	1-28910390	0.0022205	expressed_protein
LOC_Os01g60660	1-35069419	0.00222157	methionyl-tRNA_synthetase,_putative,_expressed
LOC_Os06g03380	6-1289516	0.00222187	expressed_protein
LOC_Os10g10720	10-5917275	0.00222389	retrotransposon_protein,_putative,_unclassified,_expressed
LOC_Os04g04300	4-2016791	0.00222919	retrotransposon_protein,_putative,_unclassified,_expressed
LOC_Os04g11040	4-5989552	0.00222994	expressed_protein
LOC_Os02g18515	2-10788037	0.0022306	retrotransposon_protein,_putative,_unclassified,_expressed
LOC_Os01g64370	1-37362723	0.00223264	expressed_protein
LOC_Os03g03690	3-1642367	0.0022362	glycosylphosphatidylinositol_anchor_biosynthesis_protein_11,_putative,_expressed
LOC_Os06g12320	6-6678658	0.00223652	transmembrane_amino_acid_transporter_protein,_putative,_expressed
LOC_Os01g48540	1-27840208	0.0022377	glyoxal_oxidase-related,_putative,_expressed
LOC_Os03g34170	3-19459140	0.00223962	retrotransposon_protein,_putative,_unclassified,_expressed
LOC_Os05g08140	5-4435774	0.00224569	retrotransposon_protein,_putative,_Ty3-gypsy_subclass
LOC_Os11g38750	11-23013879	0.00224674	retrotransposon_protein,_putative,_unclassified,_expressed
LOC_Os03g51710	3-29627293	0.00224734	homeobox_protein_knotted-1,_putative,_expressed
LOC_Os08g44720	8-28102892	0.00224947	retrotransposon_protein,_putative,_unclassified,_expressed
LOC_Os05g14510	5-8209140	0.00224962	retrotransposon_protein,_putative,_unclassified,_expressed
LOC_Os05g02490	5-853149	0.00225049	transporter_family_protein,_putative,_expressed
LOC_Os04g53496	4-31861870	0.00225453	NBS-LRR_disease_resistance_protein,_putative,_expressed
LOC_Os09g31160	9-18741841	0.00225621	glutamate_receptor_precursor,_putative,_expressed
LOC_Os05g11770	5-6686824	0.00225927	ulp1_protease_family_protein,_putative,_expressed
LOC_Os01g55780	1-32131604	0.0022596	glycerophosphoryl_diester_phosphodiesterase_family_protein,_putative,_expressed
LOC_Os06g12090	6-6476998	0.00225967	miro,_putative,_expressed
LOC_Os07g35310	7-21139074	0.00226032	TKL_IRAK_DUF26-lc.12_-_DUF26_kinases_have_homology_to_DUF26_containing_loci,_expressed
LOC_Os05g47510	5-27219767	0.00226835	pentatricopeptide,_putative,_expressed
LOC_Os07g05540	7-2589886	0.00226948	retrotransposon_protein,_putative,_unclassified,_expressed
LOC_Os01g51240	1-29454664	0.00227102	hypothetical_protein
LOC_Os11g20520	11-11892242	0.00227166	retrotransposon_protein,_putative,_Ty3-gypsy_subclass,_expressed
LOC_Os02g30040	2-17843265	0.00227876	retrotransposon_protein,_putative,_Ty3-gypsy_subclass,_expressed
LOC_Os02g21130	2-12546449	0.00228097	retrotransposon_protein,_putative,_unclassified,_expressed
LOC_Os10g08006	10-4312658	0.00228236	transposon_protein,_putative,_CACTA,_En/Spm_sub-class,_expressed
LOC_Os12g29550	12-17612915	0.0022858	expressed_protein
LOC_Os06g39320	6-23330056	0.00228744	retrotransposon_protein,_putative,_unclassified
LOC_Os06g03640	6-1415612	0.00229302	BAG_domain_containing_protein,_expressed
LOC_Os07g34110	7-20392547	0.00229328	integral_membrane_protein_DUF6_containing_protein,_expressed
LOC_Os01g55610	1-32038171	0.00229654	peptide_transporter_PTR2,_putative,_expressed
LOC_Os12g29434	12-17484674	0.00229792	wall-associated_receptor_kinase_3_precursor,_putative,_expressed
LOC_Os02g25430	2-14848038	0.00229992	retrotransposon_protein,_putative,_Ty3-gypsy_subclass,_expressed
LOC_Os02g01010	7738-02-01	0.00230089	OsPDIL1-4__protein_disulfide_isomerase_PDIL1-4,_expressed
LOC_Os06g12080	6-6472345	0.00230424	mTERF_family_protein,_expressed
LOC_Os02g24280	2-14081813	0.00230449	transposon_protein,_putative,_unclassified,_expressed
LOC_Os11g35100	11-20580182	0.00230611	conserved_hypothetical_protein
LOC_Os11g35210	11-20643907	0.00230611	NB-ARC_domain_containing_protein,_expressed
LOC_Os01g55500	1-31976078	0.00230719	nucleobase-ascorbate_transporter,_putative,_expressed
LOC_Os02g40410	2-24473437	0.00230741	expressed_protein
LOC_Os11g25950	11-14799072	0.00231863	retrotransposon_protein,_putative,_unclassified,_expressed
LOC_Os03g15070	3-8238599	0.0023239	expressed_protein
LOC_Os09g10750	9-5869267	0.00232723	rhodanese-like,_putative,_expressed
LOC_Os01g41660	1-23585360	0.00232921	phosphoethanolamine/phosphocholine_phosphatase,_putative,_expressed
LOC_Os02g30250	2-17985451	0.00233015	expressed_protein
LOC_Os05g18370	5-10586121	0.00233057	retrotransposon_protein,_putative,_unclassified
LOC_Os06g03390	6-1292588	0.00233491	expressed_protein
LOC_Os02g31320	2-18790394	0.00233507	transposon_protein,_putative,_CACTA,_En/Spm_sub-class
LOC_Os01g50700	1-29119915	0.00233626	dehydrin_family_protein,_expressed
LOC_Os02g47340	2-28904354	0.00234055	retrotransposon_protein,_putative,_unclassified,_expressed
LOC_Os09g03040	9-1432549	0.00234064	transposon_protein,_putative,_CACTA,_En/Spm_sub-class,_expressed
LOC_Os01g24010	1-13526970	0.00234346	pleiotropic_drug_resistance_protein,_putative,_expressed
LOC_Os01g24020	1-13526970	0.00234346	expressed_protein
LOC_Os03g61360	3-34827866	0.00234519	hydrolase,_alpha/beta_fold_family_domain_containing_protein,_expressed
LOC_Os01g21650	1-12131929	0.00234763	plant_protein_of_unknown_function_domain_containing_protein,_expressed
LOC_Os12g16390	12-9383252	0.0023477	retrotransposon_protein,_putative,_unclassified,_expressed
LOC_Os08g17700	8-10832180	0.00234957	retrotransposon_protein,_putative,_Ty1-copia_subclass,_expressed
LOC_Os12g12340	12-6782616	0.00235012	retrotransposon_protein,_putative,_unclassified,_expressed
LOC_Os06g03310	6-1258224	0.00235114	retrotransposon_protein,_putative,_unclassified,_expressed
LOC_Os07g38270	7-22955729	0.00235359	insulin-degrading_enzyme,_putative,_expressed
LOC_Os08g25180	8-15298657	0.00236015	retrotransposon_protein,_putative,_unclassified
LOC_Os01g52330	1-30075772	0.00236142	NB-ARC_domain_containing_protein,_expressed
LOC_Os08g31390	8-19408358	0.00236703	retrotransposon_protein,_putative,_unclassified,_expressed
LOC_Os03g03630	3-1608449	0.00237226	expressed_protein
LOC_Os02g25520	2-14906148	0.00237374	transposon_protein,_putative,_CACTA,_En/Spm_sub-class,_expressed
LOC_Os11g18900	11-10751724	0.00237519	expressed_protein
LOC_Os02g26984	2-15851174	0.00237635	expressed_protein
LOC_Os06g24090	6-14098376	0.00237664	retrotransposon_protein,_putative,_Ty3-gypsy_subclass
LOC_Os02g11960	2-6198284	0.00237817	ABC_transporter,_ATP-binding_protein,_putative,_expressed
LOC_Os08g18070	8-11067967	0.00237821	expressed_protein
LOC_Os11g16480	11-9115249	0.00238079	transposon_protein,_putative,_unclassified,_expressed
LOC_Os07g34030	7-20345720	0.00238166	OsPDIL5-4__protein_disulfide_isomerase_PDIL5-4,_expressed
LOC_Os07g34100	7-20388323	0.00238166	retrotransposon_protein,_putative,_unclassified,_expressed
LOC_Os01g55110	1-31711045	0.00238318	RING-H2_finger_protein,_putative,_expressed
LOC_Os04g12420	4-6860880	0.00238334	retrotransposon_protein,_putative,_unclassified,_expressed
LOC_Os04g15930	4-8651514	0.00238429	retrotransposon_protein,_putative,_unclassified,_expressed
LOC_Os05g24250	5-14027443	0.00238668	retrotransposon_protein,_putative,_Ty3-gypsy_subclass,_expressed
LOC_Os11g17460	11-9733470	0.0023885	retrotransposon_protein,_putative,_unclassified,_expressed
LOC_Os01g55190	1-31750178	0.00239135	expressed_protein
LOC_Os08g22620	8-13609802	0.00239397	retrotransposon_protein,_putative,_Ty3-gypsy_subclass,_expressed
LOC_Os03g29650	3-16904901	0.00239715	retrotransposon_protein,_putative,_Ty3-gypsy_subclass,_expressed
LOC_Os05g43300	5-25191463	0.00239969	expressed_protein
LOC_Os04g11340	4-6190764	0.0024001	retrotransposon_protein,_putative,_Ty1-copia_subclass
LOC_Os08g09500	8-5499905	0.00241004	retrotransposon_protein,_putative,_unclassified,_expressed
LOC_Os11g15540	11-8805120	0.00241045	hypothetical_protein
LOC_Os09g10710	9-5840093	0.00241636	R-interacting_factor_1,_putative,_expressed
LOC_Os01g59400	1-34351450	0.00242111	expressed_protein
LOC_Os08g29400	8-18028318	0.00242426	OsFBX290_-_F-box_domain_containing_protein,_expressed
LOC_Os03g06540	3-3292839	0.00242479	retrotransposon_protein,_putative,_unclassified,_expressed
LOC_Os09g21980	9-13303180	0.00242609	transposon_protein,_putative,_CACTA,_En/Spm_sub-class,_expressed
LOC_Os09g03939	9-2008436	0.00242627	white-brown_complex_homolog_protein_11,_putative,_expressed
LOC_Os05g47490	5-27204222	0.00242649	MDR-like_ABC_transporter,_putative,_expressed
LOC_Os03g21964	3-12571012	0.00242812	expressed_protein
LOC_Os01g55740	1-32094849	0.00242949	OsRhmbd4_-_Putative_Rhomboid_homologue,_expressed
LOC_Os05g17030	5-9717075	0.00243102	retrotransposon_protein,_putative,_Ty3-gypsy_subclass,_expressed
LOC_Os12g43580	12-27046386	0.00243504	expressed_protein
LOC_Os08g38070	8-24117484	0.00243524	expressed_protein
LOC_Os05g17360	5-9964202	0.00243805	retrotransposon_protein,_putative,_Ty3-gypsy_subclass,_expressed
LOC_Os07g07940	7-3990482	0.00243914	expressed_protein
LOC_Os04g53350	4-31768960	0.0024395	expressed_protein
LOC_Os11g36060	11-21197925	0.00244036	THUMP_domain-containing_protein,_putative,_expressed
LOC_Os08g04590	8-2290273	0.00244344	csAtPR5,_putative,_expressed
LOC_Os01g10410	1-5486186	0.00245086	transposon_protein,_putative,_unclassified
LOC_Os11g14000	11-7771072	0.00245874	ANTH_domain_containing_protein,_expressed
LOC_Os07g15260	7-8799869	0.00246077	retrotransposon_protein,_putative,_Ty1-copia_subclass,_expressed
LOC_Os01g55170	1-31738424	0.00246218	la_domain_containing_protein,_expressed
LOC_Os04g38470	4-22866778	0.00246808	expressed_protein
LOC_Os01g67480	1-39213866	0.00247871	helix-loop-helix_DNA-binding_domain_containing_protein,_expressed
LOC_Os07g06500	7-3156465	0.0024846	OsFBL34_-_F-box_domain_and_LRR_containing_protein,_expressed
LOC_Os06g23504	6-13711936	0.00248557	DTW_domain_containing_protein,_putative,_expressed
LOC_Os03g35380	3-19618992	0.00249957	retrotransposon_protein,_putative,_unclassified,_expressed
LOC_Os04g16570	4-9008027	0.00249997	retrotransposon_protein,_putative,_Ty3-gypsy_subclass,_expressed
LOC_Os01g05450	1-2573051	0.00250077	expressed_protein
LOC_Os03g55990	3-31869768	0.00250104	homeobox_domain_containing_protein,_expressed
LOC_Os02g19740	2-11549577	0.00251327	expressed_protein
LOC_Os07g22224	7-12446006	0.00251691	expressed_protein
LOC_Os01g55590	1-32027287	0.00252095	AMP-binding_enzyme,_putative,_expressed
LOC_Os01g23960	1-13480587	0.00252203	retrotransposon_protein,_putative,_Ty3-gypsy_subclass,_expressed
LOC_Os01g08020	1-3882124	0.00252413	boron_transporter_protein,_putative,_expressed
LOC_Os11g11490	11-6382455	0.00252476	TKL_IRAK_CR4L.7_-_The_CR4L_subfamily_has_homology_with_Crinkly4,_expressed
LOC_Os10g38790	10-20647569	0.00252614	expressed_protein
LOC_Os11g23040	11-13253038	0.00252647	retrotransposon_protein,_putative,_unclassified,_expressed
LOC_Os12g24600	12-14073138	0.00252675	retrotransposon_protein,_putative,_unclassified,_expressed
LOC_Os07g26190	7-15060343	0.00252873	retrotransposon_protein,_putative,_unclassified
LOC_Os06g03760	6-1489855	0.00252925	LMBR1_integral_membrane_protein,_putative,_expressed
LOC_Os09g11940	9-6721208	0.00253097	retrotransposon_protein,_putative,_Ty3-gypsy_subclass,_expressed
LOC_Os09g16240	9-9917233	0.00253446	expressed_protein
LOC_Os04g54140	4-32256631	0.00253839	receptor-like_kinase,_putative,_expressed
LOC_Os11g04730	11-2015881	0.00253988	DNA-directed_RNA_polymerases_I,_II,_and_III_subunit_RPABC1,_putative,_expressed
LOC_Os11g21950	11-12590990	0.00254265	retrotransposon_protein,_putative,_Ty3-gypsy_subclass,_expressed
LOC_Os10g35160	10-18770033	0.00254353	expressed_protein
LOC_Os04g42980	4-25426494	0.00254554	zinc_finger_family_protein,_putative,_expressed
LOC_Os11g05790	11-2678399	0.00254845	expressed_protein
LOC_Os12g42600	12-26455124	0.00254923	ubiquitin_carboxyl-terminal_hydrolase_domain_containing_protein,_expressed
LOC_Os09g16880	9-10312626	0.00255199	transposon_protein,_putative,_CACTA,_En/Spm_sub-class,_expressed
LOC_Os05g47446	5-27180392	0.00255412	expressed_protein
LOC_Os12g43570	12-27041980	0.00255584	expressed_protein
LOC_Os01g49930	1-28676994	0.00255914	expressed_protein
LOC_Os01g19894	1-11305798	0.00256229	transposon_protein,_putative,_unclassified,_expressed
LOC_Os09g24980	9-14922481	0.00256263	vesicle_transport_v-SNARE_protein,_putative,_expressed
LOC_Os01g71400	1-41371648	0.00256283	glycosyl_hydrolases_family_17,_putative,_expressed
LOC_Os03g17634	3-9808380	0.00256497	PPR_repeat_domain_containing_protein,_putative,_expressed
LOC_Os01g73620	1-42646072	0.00256682	expressed_protein
LOC_Os01g45060	1-25580961	0.00256709	polygalacturonase,_putative,_expressed
LOC_Os09g02190	9-866783	0.00256714	retrotransposon_protein,_putative,_Ty3-gypsy_subclass,_expressed
LOC_Os11g13940	11-7712708	0.00256897	NBS-LRR_disease_resistance_protein,_putative,_expressed
LOC_Os01g06960	1-3291299	0.00257179	POEI34_-_Pollen_Ole_e_I_allergen_and_extensin_family_protein_precursor,_putative,_expressed
LOC_Os10g38090	10-20394752	0.00257286	cytochrome_P450,_putative,_expressed
LOC_Os06g03710	6-1465866	0.00257838	DELLA_protein_SLR1,_putative,_expressed
LOC_Os04g01600	4-402069	0.00257915	erythronate-4-phosphate_dehydrogenase_domain_containing_protein,_expressed
LOC_Os05g01520	5-308293	0.00258448	ECT_protein,_putative,_expressed
LOC_Os04g53320	4-31763074	0.00258598	expressed_protein
LOC_Os02g01050	2-30061	0.002586	retrotransposon_protein,_putative,_unclassified,_expressed
LOC_Os05g47680	5-27320900	0.00258776	expressed_protein
LOC_Os12g18190	12-10498634	0.00258936	retrotransposon_protein,_putative,_unclassified,_expressed
LOC_Os06g30040	6-17302241	0.00259307	retrotransposon_protein,_putative,_Ty3-gypsy_subclass,_expressed
LOC_Os03g06600	3-3318145	0.00260329	expressed_protein
LOC_Os01g53779	1-30912647	0.0026074	expressed_protein
LOC_Os06g29960	6-17250717	0.00261166	retrotransposon_protein,_putative,_Ty1-copia_subclass
LOC_Os06g08070	6-3908569	0.00261591	transposon_protein,_putative,_unclassified,_expressed
LOC_Os06g25220	6-14757007	0.00261672	retrotransposon_protein,_putative,_unclassified
LOC_Os07g43604	7-26103020	0.00261728	expressed_protein
LOC_Os01g65980	1-38297604	0.00261949	retrotransposon_protein,_putative,_Ty3-gypsy_subclass,_expressed
LOC_Os05g17470	5-10037384	0.00261972	retrotransposon_protein,_putative,_Ty3-gypsy_subclass,_expressed
LOC_Os10g38690	10-20617488	0.00262067	glutathione_S-transferase,_putative,_expressed
LOC_Os09g02170	9-855638	0.00262117	unc-50,_putative,_expressed
LOC_Os10g15130	10-7933245	0.00262161	retrotransposon_protein,_putative,_Ty3-gypsy_subclass,_expressed
LOC_Os03g03654	3-1619717	0.00262265	expressed_protein
LOC_Os12g35760	12-21776613	0.00262587	transposon_protein,_putative,_unclassified,_expressed
LOC_Os06g07720	6-3738270	0.00262885	retrotransposon_protein,_putative,_Ty3-gypsy_subclass,_expressed
LOC_Os04g27730	4-16392157	0.00263181	retrotransposon_protein,_putative,_unclassified,_expressed
LOC_Os06g38040	6-22488886	0.00263817	retrotransposon_protein,_putative,_unclassified,_expressed
LOC_Os08g19750	8-11822025	0.00264351	retrotransposon_protein,_putative,_Ty3-gypsy_subclass,_expressed
LOC_Os02g31830	2-18797743	0.00264793	expressed_protein
LOC_Os02g09430	2-4838565	0.00265148	exostosin_family_domain_containing_protein,_expressed
LOC_Os11g23840	11-13492308	0.00265268	retrotransposon_protein,_putative,_Ty3-gypsy_subclass,_expressed
LOC_Os01g33960	1-18688217	0.00265552	transposon_protein,_putative,_CACTA,_En/Spm_sub-class,_expressed
LOC_Os03g03880	3-1765357	0.00265554	protein_kinase,_putative,_expressed
LOC_Os01g73430	1-42555317	0.00265607	RNA_polymerase_IV_largest_subunit,_putative,_expressed
LOC_Os09g13920	9-8194855	0.00265757	expressed_protein
LOC_Os08g25030	8-15197332	0.00266262	plant_protein_of_unknown_function_domain_containing_protein,_expressed
LOC_Os02g21730	2-12914818	0.00266678	transposon_protein,_putative,_CACTA,_En/Spm_sub-class,_expressed
LOC_Os02g48490	2-29685672	0.002669	expressed_protein
LOC_Os12g02670	12-932080	0.00267274	retrotransposon_protein,_putative,_Ty1-copia_subclass,_expressed
LOC_Os05g46840	5-27122299	0.00267499	proline-rich_protein,_putative,_expressed
LOC_Os03g08120	3-4147851	0.00267519	retrotransposon_protein,_putative,_unclassified,_expressed
LOC_Os08g21780	8-13041137	0.00267938	retrotransposon,_putative,_centromere-specific,_expressed
LOC_Os01g51650	1-29689008	0.00268107	retrotransposon_protein,_putative,_unclassified,_expressed
LOC_Os10g32950	10-17248737	0.00268353	retrotransposon_protein,_putative,_unclassified,_expressed
LOC_Os12g29500	12-17537562	0.00268862	expressed_protein
LOC_Os06g09270	6-4654696	0.00268871	hypro1,_putative,_expressed
LOC_Os11g34440	11-20175077	0.00268895	phospholipase_A2,_putative,_expressed
LOC_Os08g25770	8-15688405	0.00269226	expressed_protein
LOC_Os08g21390	8-12761599	0.00269264	retrotransposon,_putative,_centromere-specific
LOC_Os01g35070	1-19418582	0.00269484	retrotransposon_protein,_putative,_Ty3-gypsy_subclass,_expressed
LOC_Os12g31710	12-19089174	0.00269994	universal_stress_protein_domain_containing_protein,_putative,_expressed
LOC_Os07g47630	7-28470973	0.0027039	RNA_recognition_motif_containing_protein,_expressed
LOC_Os12g30540	12-18337239	0.00270669	ubiquitin_carboxyl-terminal_hydrolase,_putative,_expressed
LOC_Os08g19070	8-11384099	0.00270695	retrotransposon_protein,_putative,_unclassified
LOC_Os01g73450	1-42564126	0.00270869	amino_acid_kinase,_putative,_expressed
LOC_Os01g73470	1-42575401	0.00270869	growth_inhibition_and_differentiation-related_protein_88,_putative,_expressed
LOC_Os08g44470	8-27968908	0.0027107	expressed_protein
LOC_Os09g25650	9-15413495	0.00271229	GEX2,_putative,_expressed
LOC_Os10g34640	10-18460391	0.00271441	retrotransposon_protein,_putative,_unclassified
LOC_Os06g36730	6-21629145	0.00271465	retrotransposon_protein,_putative,_Ty3-gypsy_subclass,_expressed
LOC_Os11g10580	11-5804178	0.0027175	transposon_protein,_putative,_CACTA,_En/Spm_sub-class,_expressed
LOC_Os08g20230	8-12141103	0.00271767	hypothetical_protein
LOC_Os10g08014	10-4332283	0.00271869	white-brown_complex_homolog_protein_11,_putative,_expressed
LOC_Os08g07850	8-4409122	0.00271962	PolI-like_DNA_polymerase,_putative,_expressed
LOC_Os07g44000	7-26301442	0.00272171	expressed_protein
LOC_Os01g49370	1-28381450	0.00272989	expressed_protein
LOC_Os02g25170	2-14637484	0.00273101	retrotransposon_protein,_putative,_unclassified,_expressed
LOC_Os10g01510	10-330088	0.00273158	transposon_protein,_putative,_CACTA,_En/Spm_sub-class,_expressed
LOC_Os05g47530	5-27224812	0.00273238	Divergent_PAP2_family_domain_containing_protein,_expressed
LOC_Os05g47660	5-27313787	0.00273238	lipid_phosphatase_protein,_putative,_expressed
LOC_Os02g41890	2-25176730	0.00273676	phytosulfokine_receptor_precursor,_putative,_expressed
LOC_Os06g04800	6-2092583	0.00273724	peptidase,_T1_family,_putative,_expressed
LOC_Os06g49550	6-30008637	0.00273888	transposon_protein,_putative,_unclassified,_expressed
LOC_Os05g43350	5-25213566	0.00274003	retrotransposon_protein,_putative,_Ty3-gypsy_subclass,_expressed
LOC_Os03g33580	3-19186981	0.00274266	mitotic_checkpoint_protein,_putative,_expressed
LOC_Os04g42710	4-25265549	0.00274373	retrotransposon_protein,_putative,_unclassified,_expressed
LOC_Os06g03770	6-1493633	0.00274891	ABC_transporter,_ATP-binding_protein,_putative,_expressed
LOC_Os01g21210	1-11831946	0.00275238	retrotransposon_protein,_putative,_unclassified,_expressed
LOC_Os02g24880	2-14425977	0.00275443	retrotransposon,_putative,_centromere-specific,_expressed
LOC_Os11g27440	11-15796058	0.00275553	MLA7,_putative,_expressed
LOC_Os03g46710	3-26433598	0.00275801	expressed_protein
LOC_Os01g73270	1-42470774	0.00275865	expressed_protein
LOC_Os09g23310	9-13838317	0.0027592	retrotransposon_protein,_putative,_Ty3-gypsy_subclass,_expressed
LOC_Os09g04120	9-2137389	0.0027594	expressed_protein
LOC_Os07g41140	7-24621180	0.00276083	receptor-like_protein_kinase_precursor,_putative,_expressed
LOC_Os02g30890	2-18435184	0.00276347	expressed_protein
LOC_Os01g55160	1-31732714	0.00276407	expressed_protein
LOC_Os09g06420	9-3024243	0.00276479	retrotransposon,_putative,_centromere-specific,_expressed
LOC_Os08g13820	8-8249909	0.00276654	retrotransposon_protein,_putative,_Ty3-gypsy_subclass,_expressed
LOC_Os03g05530	3-2749447	0.00276882	nodulin,_putative,_expressed
LOC_Os07g13710	7-7871197	0.00277014	retrotransposon_protein,_putative,_unclassified,_expressed
LOC_Os03g03890	3-1774764	0.00277051	protein_kinase_family_protein,_putative,_expressed
LOC_Os09g05060	9-2720396	0.00278164	retrotransposon_protein,_putative,_Ty1-copia_subclass,_expressed
LOC_Os10g23880	10-12251250	0.00278468	retrotransposon_protein,_putative,_Ty3-gypsy_subclass,_expressed
LOC_Os06g35120	6-20434561	0.00278651	retrotransposon_protein,_putative,_LINE_subclass,_expressed
LOC_Os01g28000	1-15654461	0.00278813	retrotransposon_protein,_putative,_Ty3-gypsy_subclass,_expressed
LOC_Os11g06710	11-3270154	0.00278956	hypothetical_protein
LOC_Os08g24880	8-15059136	0.00279032	EDM2,_putative,_expressed
LOC_Os06g03700	6-1459212	0.00279044	oligopeptide_transporter,_putative,_expressed
LOC_Os02g01550	2-313802	0.00279872	OsFBL6_-_F-box_domain_and_LRR_containing_protein,_expressed
LOC_Os05g25750	5-14979280	0.00279942	retrotransposon_protein,_putative,_unclassified,_expressed
LOC_Os01g48820	1-28012447	0.0028006	expressed_protein
LOC_Os11g22910	11-13170829	0.00280416	retrotransposon_protein,_putative,_Ty3-gypsy_subclass,_expressed
LOC_Os11g09990	11-5358821	0.00280602	mTERF_family_protein,_expressed
LOC_Os06g37490	6-22183483	0.00280737	expressed_protein
LOC_Os05g06110	5-3056471	0.00280753	villin,_putative,_expressed
LOC_Os01g15090	1-8461293	0.00281081	retrotransposon_protein,_putative,_unclassified
LOC_Os04g42730	4-25287679	0.00281376	retrotransposon_protein,_putative,_unclassified
LOC_Os06g28750	6-16378017	0.00281476	retrotransposon_protein,_putative,_Ty1-copia_subclass,_expressed
LOC_Os08g16540	8-10125341	0.00281568	retrotransposon_protein,_putative,_unclassified,_expressed
LOC_Os01g29320	1-16426364	0.00281624	retrotransposon_protein,_putative,_unclassified,_expressed
LOC_Os02g50670	2-30954950	0.00281686	expressed_protein
LOC_Os09g30330	9-18465640	0.00281816	phosphatidylinositol_transfer,_putative,_expressed
LOC_Os01g48874	1-28033002	0.00282043	wax_synthase,_putative,_expressed
LOC_Os01g50590	1-29045319	0.00282081	cytochrome_P450,_putative,_expressed
LOC_Os09g02920	9-1372965	0.0028219	retrotransposon_protein,_putative,_Ty3-gypsy_subclass,_expressed
LOC_Os12g36540	12-22375201	0.00282415	expressed_protein
LOC_Os12g36640	12-22429691	0.00282415	universal_stress_protein_domain_containing_protein,_putative,_expressed
LOC_Os12g08170	12-4176322	0.00282773	2-oxo_acid_dehydrogenases_acyltransferase_domain_containing_protein,_expressed
LOC_Os09g21970	9-13298153	0.00282965	transposon_protein,_putative,_CACTA,_En/Spm_sub-class
LOC_Os01g04720	1-2131189	0.0028333	leucine-rich_repeat_protein-related,_putative,_expressed
LOC_Os03g04500	3-2098442	0.00283371	tetratricopeptide_repeat_domain_containing_protein,_expressed
LOC_Os11g19820	11-11421171	0.00283592	retrotransposon_protein,_putative,_unclassified,_expressed
LOC_Os06g37860	6-22416646	0.00283717	transposon_protein,_putative,_CACTA,_En/Spm_sub-class,_expressed
LOC_Os02g37654	2-22724952	0.00283803	lecithin:cholesterol_acyltransferase,_putative,_expressed
LOC_Os10g38070	10-20388416	0.00284606	expressed_protein
LOC_Os02g26060	2-15298951	0.00284692	retrotransposon_protein,_putative,_Ty3-gypsy_subclass,_expressed
LOC_Os12g35690	12-21700490	0.00284694	RALFL5_-_Rapid_ALkalinization_Factor_RALF_family_protein_precursor,_expressed
LOC_Os03g35788	3-19841322	0.00284749	retrotransposon_protein,_putative,_unclassified,_expressed
LOC_Os03g29290	3-16676301	0.00285256	transposon_protein,_putative,_CACTA,_En/Spm_sub-class,_expressed
LOC_Os05g36240	5-21482339	0.00285701	expressed_protein
LOC_Os06g35574	6-20760987	0.00286765	mki67_protein,_putative,_expressed
LOC_Os05g19250	5-11183224	0.00286827	retrotransposon_protein,_putative,_Ty1-copia_subclass,_expressed
LOC_Os11g24030	11-13623513	0.00286858	retrotransposon_protein,_putative,_unclassified
LOC_Os05g22330	5-12638878	0.00287464	retrotransposon_protein,_putative,_Ty3-gypsy_subclass,_expressed
LOC_Os07g44740	7-26706172	0.00288041	chaperonin,_putative,_expressed
LOC_Os08g44480	8-27973119	0.00288863	40S_ribosomal_protein_S25,_putative,_expressed
LOC_Os02g43130	2-25976291	0.00289076	kinesin_motor_domain_containing_protein,_expressed
LOC_Os02g33270	2-19773343	0.00289134	retrotransposon_protein,_putative,_unclassified,_expressed
LOC_Os08g40919	8-25890581	0.00289491	expressed_protein
LOC_Os02g49060	2-29994614	0.00289507	amino_acid_transporter,_putative,_expressed
LOC_Os03g33590	3-19199325	0.00289544	interferon-related_developmental_regulator,_putative,_expressed
LOC_Os01g45410	1-25768970	0.00289596	expressed_protein
LOC_Os05g47520	5-27223439	0.00289781	expressed_protein
LOC_Os03g05580	3-2793648	0.00290029	expressed_protein
LOC_Os04g04980	4-2413873	0.00290805	pyridoxal-dependent_decarboxylase_protein,_putative,_expressed
LOC_Os08g40650	8-25737475	0.00290856	senescence-induced_receptor-like_serine/threonine-protein_kinase_precursor,_putative,_expressed
LOC_Os03g20400	3-11543382	0.0029111	hypothetical_protein
LOC_Os10g26090	10-13514917	0.00291447	transposon_protein,_putative,_CACTA,_En/Spm_sub-class,_expressed
LOC_Os11g06760	11-3298039	0.00291567	protein_of_unknown_function_domain_containing_protein,_expressed
LOC_Os09g30240	9-18412583	0.00291568	phosphofructokinase,_putative,_expressed
LOC_Os08g26870	8-16341001	0.00291831	wound_responsive_protein,_putative,_expressed
LOC_Os09g18360	9-11260717	0.00292284	expressed_protein
LOC_Os01g55600	1-32032768	0.00292356	peptide_transporter_PTR2,_putative,_expressed
LOC_Os01g55630	1-32053134	0.00292356	glutelin,_putative,_expressed
LOC_Os01g55640	1-32057976	0.00292356	seven_in_absentia_protein_family_protein,_putative,_expressed
LOC_Os01g55650	1-32057976	0.00292356	phospholipase,_patatin_family,_putative,_expressed
LOC_Os01g55700	1-32072971	0.00292356	NLI_interacting_factor-like_phosphatase,_putative,_expressed
LOC_Os01g55720	1-32088842	0.00292356	expressed_protein
LOC_Os01g55900	1-32192665	0.00292671	holliday_junction_resolvase,_putative,_expressed
LOC_Os08g16740	8-10232991	0.00292996	expressed_protein
LOC_Os07g44160	7-26396706	0.00293005	retrotransposon_protein,_putative,_unclassified,_expressed
LOC_Os01g48570	1-27853302	0.0029311	expressed_protein
LOC_Os06g40370	6-24043107	0.00293234	CAMK_KIN1/SNF1/Nim1_like.27_-_CAMK_includes_calcium/calmodulin_depedent_protein_kinases,_expressed
LOC_Os01g48530	1-27835482	0.00293396	expressed_protein
LOC_Os04g08190	4-4353481	0.00293854	expressed_protein
LOC_Os04g57460	4-34185386	0.00294277	retrotransposon_protein,_putative,_unclassified,_expressed
LOC_Os03g05780	3-2883013	0.00294285	4-coumarate--CoA_ligase-like_7,_putative,_expressed
LOC_Os04g17574	4-9606669	0.00294511	retrotransposon,_putative,_centromere-specific,_expressed
LOC_Os05g51770	5-29704991	0.00295005	retrotransposon_protein,_putative,_Ty3-gypsy_subclass,_expressed
LOC_Os08g22960	8-13808864	0.00295015	retrotransposon_protein,_putative,_Ty3-gypsy_subclass,_expressed
LOC_Os08g17810	8-10920444	0.00295118	retrotransposon_protein,_putative,_unclassified
LOC_Os07g38810	7-23283131	0.00295475	lectin_receptor-type_protein_kinase,_putative,_expressed
LOC_Os11g10200	11-5533977	0.00295684	OsFBX413_-_F-box_domain_containing_protein,_expressed
LOC_Os09g02940	9-1378571	0.00295831	retrotransposon_protein,_putative,_Ty3-gypsy_subclass,_expressed
LOC_Os03g25580	3-14638847	0.00296408	retrotransposon_protein,_putative,_unclassified,_expressed
LOC_Os10g41980	10-22575562	0.00296586	RALFL26_-_Rapid_ALkalinization_Factor_RALF_family_protein_precursor,_expressed
LOC_Os04g53996	4-32183786	0.00297003	protein_kinase,_putative,_expressed
LOC_Os03g46770	3-26460296	0.00297087	RNA_recognition_motif_containing_protein,_expressed
LOC_Os01g69000	1-40084809	0.00297117	retrotransposon_protein,_putative,_unclassified
LOC_Os09g02910	9-1361193	0.00297143	expressed_protein
LOC_Os03g25590	3-14641299	0.00297804	retrotransposon_protein,_putative,_Ty3-gypsy_subclass,_expressed
LOC_Os02g26070	2-15305529	0.00297816	retrotransposon_protein,_putative,_unclassified,_expressed
LOC_Os04g51809	4-30717267	0.00297856	expressed_protein
LOC_Os04g04950	4-2395979	0.00297877	copper_methylamine_oxidase_precursor,_putative,_expressed
LOC_Os02g28020	2-16592057	0.00297978	retrotransposon_protein,_putative,_Ty1-copia_subclass,_expressed
LOC_Os07g35620	7-21325826	0.00298054	expressed_protein
LOC_Os03g41970	3-23320627	0.00298452	retrotransposon_protein,_putative,_unclassified
LOC_Os05g18604	5-10768899	0.00298753	OsSCP28_-_Putative_Serine_Carboxypeptidase_homologue,_expressed
LOC_Os12g34900	12-21248640	0.00300519	expressed_protein
LOC_Os09g32380	9-19336630	0.00301083	transposon_protein,_putative,_unclassified,_expressed
LOC_Os03g35690	3-19767980	0.00301118	retrotransposon_protein,_putative,_Ty3-gypsy_subclass,_expressed
LOC_Os12g20240	12-11806520	0.00301687	retrotransposon_protein,_putative,_unclassified,_expressed
LOC_Os02g28400	2-16783708	0.00301736	retrotransposon_protein,_putative,_unclassified,_expressed
LOC_Os12g07400	12-3650690	0.00301919	expressed_protein
LOC_Os02g14100	2-7700001	0.00301945	retrotransposon_protein,_putative,_unclassified,_expressed
LOC_Os10g16630	10-8291435	0.00302031	retrotransposon_protein,_putative,_Ty3-gypsy_subclass
LOC_Os11g14010	11-7776721	0.00302067	PHD_finger_protein,_putative,_expressed
LOC_Os01g18410	1-10347781	0.00302183	expressed_protein
LOC_Os09g28670	9-17432425	0.00302289	retrotransposon_protein,_putative,_unclassified,_expressed
LOC_Os10g38680	10-20611859	0.00302298	expressed_protein
LOC_Os03g01360	3-274686	0.00302368	expressed_protein
LOC_Os05g14400	5-8113406	0.00302382	retrotransposon_protein,_putative,_unclassified,_expressed
LOC_Os11g27920	11-16064687	0.00302902	retrotransposon_protein,_putative,_Ty3-gypsy_subclass,_expressed
LOC_Os09g02500	9-1037498	0.00303126	transposon_protein,_putative,_CACTA,_En/Spm_sub-class,_expressed
LOC_Os06g09280	6-4660255	0.00303154	ATP-dependent_RNA_helicase,_putative,_expressed
LOC_Os03g04570	3-2132108	0.003043	peptide_transporter_PTR3-A,_putative,_expressed
LOC_Os03g36750	3-20380081	0.00304442	cbbY,_putative,_expressed
LOC_Os04g56800	4-33873612	0.00304705	peptidyl-prolyl_cis-trans_isomerase,_putative,_expressed
LOC_Os01g51200	1-29435809	0.00304742	CK1_CaseinKinase_1.3_-_CK1_includes_the_casein_kinase_1_kinases,_expressed
LOC_Os05g23300	5-13301256	0.00305049	retrotransposon_protein,_putative,_Ty3-gypsy_subclass,_expressed
LOC_Os01g52480	1-30157738	0.00305179	senescence-associated_protein,_putative,_expressed
LOC_Os10g35490	10-18990626	0.00305447	hydrolase,_alpha/beta_fold_family_domain_containing_protein,_expressed
LOC_Os08g29500	8-18087879	0.00306604	histone-like_transcription_factor_and_archaeal_histone,_putative,_expressed
LOC_Os09g08960	9-4762446	0.0030669	retrotransposon_protein,_putative,_unclassified,_expressed
LOC_Os02g23860	2-13815273	0.00306925	retrotransposon,_putative,_centromere-specific,_expressed
LOC_Os03g31446	3-17925814	0.00307151	expressed_protein
LOC_Os08g16260	8-9921643	0.00307208	cytochrome_P450_protein,_putative,_expressed
LOC_Os11g40590	11-24221287	0.00307464	DUF1399_containing_protein,_putative,_expressed
LOC_Os10g38670	10-20610932	0.00307953	glutathione_S-transferase,_putative,_expressed
LOC_Os10g38710	10-20622875	0.00307953	glutathione_S-transferase,_putative,_expressed
LOC_Os02g26050	2-15293856	0.00308027	retrotransposon_protein,_putative,_Ty3-gypsy_subclass,_expressed
LOC_Os03g24339	3-13854242	0.00308482	PWWP_domain_containing_protein,_expressed
LOC_Os08g33090	8-20567373	0.00308524	inactive_receptor_kinase_At2g26730_precursor,_putative,_expressed
LOC_Os10g42630	10-22989315	0.00308761	expressed_protein
LOC_Os05g47480	5-27201560	0.00308791	transcription_initiation_factor_IIB,_putative,_expressed
LOC_Os03g06210	3-3115210	0.00308923	expressed_protein
LOC_Os12g43510	12-26985563	0.0030899	expressed_protein
LOC_Os08g23440	8-14187159	0.00309286	amino_acid_permease_family_protein,_putative,_expressed
LOC_Os11g13960	11-7726170	0.00310042	retrotransposon_protein,_putative,_Ty1-copia_subclass,_expressed
LOC_Os08g19710	8-11804488	0.00310058	retrotransposon_protein,_putative,_Ty3-gypsy_subclass,_expressed
LOC_Os02g01210	2-119615	0.00310368	amino_acid_transporter,_putative,_expressed
LOC_Os08g20420	8-12267406	0.00310511	MGD2,_putative,_expressed
LOC_Os04g54120	4-32247552	0.00310843	serine/threonine-protein_kinase_receptor_precursor,_putative,_expressed
LOC_Os03g32330	3-18499484	0.00310991	expressed_protein
LOC_Os09g32850	9-19587444	0.00311246	expressed_protein
LOC_Os05g31350	5-18223622	0.00311649	conserved_hypothetical_protein
LOC_Os02g19750	2-11553998	0.00312055	NBS-LRR_type_disease_resistance_protein,_putative,_expressed
LOC_Os12g35610	12-21651786	0.00312119	respiratory_burst_oxidase,_putative,_expressed
LOC_Os03g36684	3-20345405	0.00312582	retrotransposon_protein,_putative,_unclassified,_expressed
LOC_Os03g04300	3-1970555	0.00312801	ankyrin_repeat_domain_containing_protein,_expressed
LOC_Os02g28510	2-16864357	0.00312904	retrotransposon_protein,_putative,_Ty3-gypsy_subclass,_expressed
LOC_Os12g38740	12-23802910	0.00313001	retrotransposon_protein,_putative,_unclassified,_expressed
LOC_Os05g27820	5-16218281	0.00313047	patellin_protein,_putative,_expressed
LOC_Os07g39970	7-23981183	0.00313547	ZOS7-08_-_C2H2_zinc_finger_protein,_expressed
LOC_Os01g59670	1-34514393	0.00314411	expressed_protein
LOC_Os02g53900	2-33004331	0.00315051	expressed_protein
LOC_Os02g35110	2-21074912	0.00316084	tubulin_binding_cofactor_C,_putative,_expressed
LOC_Os01g48550	1-27843622	0.0031648	expressed_protein
LOC_Os03g36740	3-20376108	0.0031683	retrotransposon_protein,_putative,_Ty3-gypsy_subclass
LOC_Os01g52120	1-29971886	0.00317708	expressed_protein
LOC_Os01g38900	1-21842021	0.00318216	TKL_IRAK_DUF26-le.2_-_DUF26_kinases_have_homology_to_DUF26_containing_loci,_expressed
LOC_Os12g04810	12-2052642	0.00318319	retrotransposon_protein,_putative,_Ty3-gypsy_subclass,_expressed
LOC_Os09g24050	9-14306755	0.00318935	retrotransposon_protein,_putative,_Ty3-gypsy_subclass,_expressed
LOC_Os06g22180	6-12870092	0.00318965	retrotransposon_protein,_putative,_unclassified,_expressed
LOC_Os11g03290	11-1225675	0.00319201	nucleoside-triphosphatase,_putative,_expressed
LOC_Os08g25580	8-15564609	0.00319384	transposon_protein,_putative,_unclassified,_expressed
LOC_Os07g05970	7-2895354	0.00319462	ligA,_putative,_expressed
LOC_Os12g35370	12-21506485	0.00319829	transposon_protein,_putative,_CACTA,_En/Spm_sub-class,_expressed
LOC_Os12g24710	12-14167872	0.00319869	retrotransposon_protein,_putative,_unclassified,_expressed
LOC_Os12g22050	12-12410857	0.00319976	retrotransposon_protein,_putative,_unclassified,_expressed
LOC_Os10g38730	10-20631614	0.00320222	glutathione_S-transferase,_putative,_expressed
LOC_Os06g47390	6-28720998	0.00320412	conserved_hypothetical_protein
LOC_Os01g42460	1-24142614	0.00320499	BAH_domain_containing_protein,_expressed
LOC_Os03g03700	3-1645315	0.0032088	MLO_domain_containing_protein,_putative,_expressed
LOC_Os01g31629	1-17311536	0.003211	expressed_protein
LOC_Os03g37290	3-20667156	0.00321159	cytochrome_P450,_putative,_expressed
LOC_Os09g10030	9-5465043	0.00321454	retrotransposon_protein,_putative,_unclassified,_expressed
LOC_Os07g47790	7-28541469	0.00321723	AP2_domain_containing_protein,_expressed
LOC_Os02g38290	2-23152951	0.00322598	cytochrome_P450,_putative,_expressed
LOC_Os05g07700	5-4143022	0.00323075	ribosomal_protein,_putative,_expressed
LOC_Os09g04624	9-2459387	0.00323278	GDSL-like_lipase/acylhydrolase,_putative,_expressed
LOC_Os01g51220	1-29442881	0.00323567	transport_protein_particle_component,_Bet3,_domain_containing_protein,_expressed
LOC_Os12g32430	12-19558521	0.0032361	retrotransposon_protein,_putative,_unclassified,_expressed
LOC_Os04g39190	4-23310665	0.00323655	cell_division_protease_ftsH_homolog_4,_putative,_expressed
LOC_Os01g57780	1-33419408	0.00324427	retrotransposon_protein,_putative,_unclassified,_expressed
LOC_Os11g15520	11-8794956	0.00324623	OsSub62_-_Putative_Subtilisin_homologue,_expressed
LOC_Os03g03660	3-1627462	0.00324647	CAMK_CAMK_like.17_-_CAMK_includes_calcium/calmodulin_depedent_protein_kinases,_expressed
LOC_Os11g14400	11-8085255	0.00324865	polygalacturonase,_putative,_expressed
LOC_Os10g13630	10-7388828	0.00325009	expressed_protein
LOC_Os09g24250	9-14398978	0.00325112	ubiquitin_carboxyl-terminal_hydrolase_domain_containing_protein,_expressed
LOC_Os05g08950	5-4950721	0.00325229	phosphoribosyl_transferase,_putative,_expressed
LOC_Os03g33600	3-19208158	0.00325231	retrotransposon,_putative,_centromere-specific,_expressed
LOC_Os05g02250	5-716346	0.0032544	expressed_protein
LOC_Os10g13770	10-7482848	0.00325603	retrotransposon_protein,_putative,_unclassified,_expressed
LOC_Os11g21890	11-12563980	0.00325708	transposon_protein,_putative,_CACTA,_En/Spm_sub-class,_expressed
LOC_Os12g03899	12-1606874	0.00326238	major_facilitator_superfamily_antiporter,_putative,_expressed
LOC_Os04g08415	4-4521400	0.00326374	expressed_protein
LOC_Os07g01880	7-532472	0.00326436	VIP4,_putative,_expressed
LOC_Os01g07020	1-3306523	0.00326638	POEI39_-_Pollen_Ole_e_I_allergen_and_extensin_family_protein_precursor,_putative,_expressed
LOC_Os01g73420	1-42547698	0.00327135	mitochondrial_carrier_protein,_putative,_expressed
LOC_Os07g48630	7-29116694	0.00327156	ethylene-insensitive_3,_putative,_expressed
LOC_Os09g22110	9-13391462	0.00328236	retrotransposon_protein,_putative,_Ty3-gypsy_subclass,_expressed
LOC_Os01g68720	1-39919512	0.00328307	keratin,_type_I_cytoskeletal_9,_putative,_expressed
LOC_Os01g41020	1-23229606	0.00328385	expressed_protein
LOC_Os11g27960	11-16082528	0.00328889	retrotransposon_protein,_putative,_Ty1-copia_subclass,_expressed
LOC_Os07g33360	7-19938475	0.00328958	expressed_protein
LOC_Os09g03080	9-1458732	0.00328975	conserved_hypothetical_protein
LOC_Os09g18159	9-11123946	0.00329146	light_repressible_receptor_protein_kinase,_putative,_expressed
LOC_Os08g08160	8-4645200	0.00329382	expressed_protein
LOC_Os11g18780	11-10660488	0.00329467	retrotransposon_protein,_putative,_unclassified,_expressed
LOC_Os08g17580	8-10754741	0.00329965	hypothetical_protein
LOC_Os04g44630	4-26409777	0.00330006	transposon_protein,_putative,_unclassified,_expressed
LOC_Os02g04990	2-2368074	0.00330058	expressed_protein
LOC_Os06g22090	6-12818787	0.0033013	retrotransposon_protein,_putative,_Ty1-copia_subclass,_expressed
LOC_Os04g56600	4-33754067	0.00330153	expressed_protein
LOC_Os05g18930	5-10987875	0.00330298	retrotransposon_protein,_putative,_Ty3-gypsy_subclass,_expressed
LOC_Os08g17710	8-10838884	0.00330374	retrotransposon_protein,_putative,_Ty1-copia_subclass,_expressed
LOC_Os05g50490	5-28951300	0.00330486	X8_domain_containing_protein,_expressed
LOC_Os03g03290	3-1410555	0.00330609	receptor-like_protein_kinase_At3g46290_precursor,_putative,_expressed
LOC_Os01g49000	1-28136991	0.00330687	katanin_p60_ATPase-containing_subunit,_putative,_expressed
LOC_Os11g43150	11-26041094	0.00330981	transposon_protein,_putative,_CACTA,_En/Spm_sub-class,_expressed
LOC_Os02g35760	2-21476579	0.00331125	STRUBBELIG-RECEPTOR_FAMILY_7_precursor,_putative,_expressed
LOC_Os05g47690	5-27324097	0.00331142	reticulon_domain_containing_protein,_putative,_expressed
LOC_Os08g23320	8-14080857	0.00331551	para-hydroxybenzoate--polyprenyltransferase,_mitochondrial_precursor,_putative,_expressed
LOC_Os03g42530	3-23662945	0.00331555	retrotransposon,_putative,_centromere-specific,_expressed
LOC_Os06g19670	6-11230049	0.003326	OsFBX196_-_F-box_domain_containing_protein,_expressed
LOC_Os11g18970	11-10813228	0.00332631	expressed_protein
LOC_Os09g32526	9-19415430	0.00332697	peptidyl-prolyl_cis-trans_isomerase,_FKBP-type,_putative,_expressed
LOC_Os03g20040	3-11296589	0.00332928	retrotransposon_protein,_putative,_unclassified,_expressed
LOC_Os10g38720	10-20629121	0.00333083	glutathione_S-transferase,_putative,_expressed
LOC_Os12g19810	12-11553704	0.00334029	retrotransposon_protein,_putative,_unclassified,_expressed
LOC_Os01g11870	1-6428208	0.00334086	expressed_protein
LOC_Os06g17470	6-10135314	0.00334523	expressed_protein
LOC_Os11g03440	11-1318568	0.00334781	myb-like_DNA-binding_domain_containing_protein,_putative,_expressed
LOC_Os11g13934	11-7709040	0.0033479	expressed_protein
LOC_Os05g20950	5-12321922	0.00334913	retrotransposon_protein,_putative,_unclassified,_expressed
LOC_Os11g22310	11-12793020	0.00334986	retrotransposon_protein,_putative,_unclassified,_expressed
LOC_Os06g49830	6-30162554	0.00335259	SHI,_putative,_expressed
LOC_Os08g30590	8-18850332	0.00335273	C1-like_domain_containing_protein,_expressed
LOC_Os03g20700	3-11712557	0.00335626	magnesium-chelatase,_putative,_expressed
LOC_Os02g07690	2-4009770	0.00335646	VQ_domain_containing_protein,_putative,_expressed
LOC_Os09g03400	9-1676204	0.0033575	retrotransposon_protein,_putative,_unclassified,_expressed
LOC_Os01g34840	1-19237846	0.00335758	retrotransposon_protein,_putative,_Ty1-copia_subclass,_expressed
LOC_Os06g03500	6-1347557	0.00336264	NBS-LRR_disease_resistance_protein,_putative,_expressed
LOC_Os10g24770	10-12737303	0.00336271	retrotransposon_protein,_putative,_unclassified,_expressed
LOC_Os09g06499	9-3074764	0.00336575	sulfate_transporter_4.1,_chloroplast_precursor,_putative,_expressed
LOC_Os06g03780	6-1506452	0.00336642	NUC153_domain_containing_protein,_expressed
LOC_Os08g23990	8-14512337	0.00337397	retrotransposon_protein,_putative,_unclassified,_expressed
LOC_Os03g28410	3-16385282	0.00337509	ribosomal_protein_S2,_putative,_expressed
LOC_Os02g20660	2-12174552	0.00338034	retrotransposon_protein,_putative,_Ty3-gypsy_subclass,_expressed
LOC_Os07g10550	7-5705426	0.00338103	cyclin-related_protein,_putative,_expressed
LOC_Os05g17750	5-10204087	0.00339033	retrotransposon_protein,_putative,_Ty1-copia_subclass
LOC_Os06g44034	6-26558253	0.00339094	expressed_protein
LOC_Os07g11260	7-6206018	0.00339326	retrotransposon_protein,_putative,_Ty3-gypsy_subclass,_expressed
LOC_Os02g11930	2-6184311	0.00339821	receptor-like_protein_kinase_precursor,_putative,_expressed
LOC_Os08g04490	8-2205402	0.00339856	expressed_protein
LOC_Os08g36020	8-22703072	0.00339953	Disease_resistance/zinc_finger/chromosome_condensation-like_region_protein,_putative,_expressed
LOC_Os08g36370	8-22924680	0.00340054	expressed_protein
LOC_Os04g56790	4-33870282	0.00340067	TLD_family_protein,_putative,_expressed
LOC_Os12g22660	12-12799781	0.00340192	expressed_protein
LOC_Os04g54130	4-32249659	0.00340384	TKL_IRAK_DUF26-ld.1_-_DUF26_kinases_have_homology_to_DUF26_containing_loci,_expressed
LOC_Os11g25670	11-14644773	0.00340815	retrotransposon_protein,_putative,_Ty3-gypsy_subclass,_expressed
LOC_Os07g44930	7-26805315	0.00340956	dirigent,_putative,_expressed
LOC_Os06g36080	6-21106498	0.00341311	kinesin_motor_domain_containing_protein,_expressed
LOC_Os01g73250	1-42461945	0.00341321	abscisic_stress-ripening,_putative,_expressed
LOC_Os01g63080	1-36554308	0.00341415	retrotransposon_protein,_putative,_Ty3-gypsy_subclass,_expressed
LOC_Os10g32930	10-17236883	0.00342009	expressed_protein
LOC_Os11g27880	11-16049955	0.00342102	retrotransposon_protein,_putative,_unclassified,_expressed
LOC_Os03g25890	3-14807156	0.00342117	retrotransposon_protein,_putative,_unclassified,_expressed
LOC_Os06g23460	6-13693231	0.00342757	KH_domain_containing_protein,_putative,_expressed
LOC_Os11g20480	11-11865116	0.00343103	expressed_protein
LOC_Os11g06810	11-3332899	0.00343192	expressed_protein
LOC_Os12g23110	12-13066215	0.0034339	retrotransposon_protein,_putative,_unclassified,_expressed
LOC_Os07g23290	7-13123662	0.00344179	transposon_protein,_putative,_CACTA,_En/Spm_sub-class,_expressed
LOC_Os08g25600	8-15578398	0.00344245	hypothetical_protein
LOC_Os04g08670	4-4708959	0.003445	retrotransposon_protein,_putative,_unclassified,_expressed
LOC_Os06g28160	6-15997648	0.00344774	expressed_protein
LOC_Os09g06900	9-3318274	0.00344784	retrotransposon_protein,_putative,_unclassified,_expressed
LOC_Os04g16560	4-9005882	0.00344958	retrotransposon_protein,_putative,_Ty3-gypsy_subclass,_expressed
LOC_Os05g24740	5-14341741	0.00345712	retrotransposon_protein,_putative,_unclassified
LOC_Os07g40060	7-24050391	0.00345773	retrotransposon_protein,_putative,_unclassified,_expressed
LOC_Os07g01460	7-301151	0.00345813	expressed_protein
LOC_Os12g24420	12-13938099	0.00346017	cyclin-dependent_kinase_G-1,_putative,_expressed
LOC_Os07g48020	7-28674392	0.00346223	peroxidase_precursor,_putative,_expressed
LOC_Os07g48040	7-28684473	0.00346433	peroxidase_precursor,_putative,_expressed
LOC_Os09g04130	9-2139660	0.00346603	retrotransposon_protein,_putative,_unclassified,_expressed
LOC_Os05g26250	5-15274789	0.00346704	PROLM3_-_Prolamin_precursor,_putative,_expressed
LOC_Os05g26359	5-15274789	0.00346704	PROLM6_-_Prolamin_precursor,_putative,_expressed
LOC_Os05g26400	5-15274789	0.00346704	prolamin_precursor,_putative,_expressed
LOC_Os07g27690	7-16158790	0.00346833	retrotransposon_protein,_putative,_unclassified,_expressed
LOC_Os03g41990	3-23329443	0.0034696	retrotransposon_protein,_putative,_unclassified,_expressed
LOC_Os10g09180	10-4958643	0.00346987	expressed_protein
LOC_Os08g39540	8-25013044	0.003471	zinc_knuckle_domain_containing_protein,_expressed
LOC_Os03g28270	3-16259973	0.00347428	Leucine_Rich_Repeat_family_protein,_expressed
LOC_Os11g29630	11-17180563	0.00347989	expressed_protein
LOC_Os03g24190	3-13754538	0.00348325	retrotransposon_protein,_putative,_unclassified,_expressed
LOC_Os01g36380	1-20188290	0.00348435	retrotransposon_protein,_putative,_unclassified
LOC_Os05g38060	5-22314739	0.00348484	retrotransposon_protein,_putative,_Ty1-copia_subclass,_expressed
LOC_Os10g38740	10-20633690	0.00348929	glutathione_S-transferase,_putative,_expressed
LOC_Os10g38800	10-20652875	0.00348929	leucine-rich_repeat_transmembrane_protein_kinase,_putative,_expressed
LOC_Os07g15330	7-8833033	0.00349028	expressed_protein
LOC_Os01g02170	1-634366	0.00349465	expressed_protein
LOC_Os06g03320	6-1267061	0.00349653	retrotransposon_protein,_putative,_unclassified,_expressed
LOC_Os11g06750	11-3296530	0.00350134	ribosomal_protein_L3,_putative,_expressed
LOC_Os11g29940	11-17401888	0.00350233	expressed_protein
LOC_Os04g54920	4-32667978	0.00350528	retrotransposon_protein,_putative,_unclassified
LOC_Os03g04520	3-2103682	0.00350621	RNA_recognition_motif_containing_protein,_putative,_expressed
LOC_Os09g33590	9-19819418	0.00350747	retrotransposon_protein,_putative,_unclassified,_expressed
LOC_Os04g35090	4-21330369	0.00350966	40S_ribosomal_protein_S10,_putative,_expressed
LOC_Os09g32090	9-19152704	0.00351193	methyl-binding_domain_protein_MBD,_putative,_expressed
LOC_Os05g27790	5-16185278	0.00351411	membrane_associated_DUF588_domain_containing_protein,_putative,_expressed
LOC_Os04g46220	4-27372266	0.00351635	ethylene-responsive_transcription_factor,_putative,_expressed
LOC_Os08g19010	8-11349863	0.00351714	retrotransposon,_putative,_centromere-specific
LOC_Os07g33470	7-20003812	0.0035183	expressed_protein
LOC_Os03g36520	3-20222023	0.00351858	retrotransposon,_putative,_centromere-specific,_expressed
LOC_Os08g24330	8-14687526	0.00351905	transposon_protein,_putative,_CACTA,_En/Spm_sub-class,_expressed
LOC_Os03g05760	3-2871002	0.00352106	transcription_factor_Dp,_putative,_expressed
LOC_Os03g53590	3-30731478	0.00352196	expressed_protein
LOC_Os08g42440	8-26796481	0.00352749	CCT/B-box_zinc_finger_protein,_putative,_expressed
LOC_Os12g18100	12-10408322	0.00352862	transposon_protein,_putative,_CACTA,_En/Spm_sub-class,_expressed
LOC_Os04g21760	4-12314997	0.00352959	retrotransposon_protein,_putative,_Ty3-gypsy_subclass,_expressed
LOC_Os11g25720	11-14666785	0.00352965	cytokinin-N-glucosyltransferase_1,_putative,_expressed
LOC_Os01g48940	1-28084573	0.00353317	expressed_protein
LOC_Os02g04290	2-1892234	0.0035349	retrotransposon_protein,_putative,_unclassified,_expressed
LOC_Os11g24930	11-14194599	0.00353628	retrotransposon_protein,_putative,_Ty3-gypsy_subclass,_expressed
LOC_Os09g04830	9-2572812	0.00353635	retrotransposon_protein,_putative,_unclassified,_expressed
LOC_Os09g01380	9-310259	0.00353689	conserved_hypothetical_protein
LOC_Os10g10680	10-5900891	0.00354298	transposon_protein,_putative,_CACTA,_En/Spm_sub-class,_expressed
LOC_Os02g12939	2-6834563	0.00354842	expressed_protein
LOC_Os04g34520	4-20894178	0.00355021	hypothetical_protein
LOC_Os02g17470	2-10053435	0.00355039	RNA-binding_protein-related,_putative,_expressed
LOC_Os01g49360	1-28377356	0.00355225	FAD-binding_and_arabino-lactone_oxidase_domains_containing_protein,_putative,_expressed
LOC_Os02g24800	2-14391041	0.00355742	retrotransposon_protein,_putative,_unclassified,_expressed
LOC_Os05g08680	5-4753885	0.00355826	microneme_protein_Sm70,_putative,_expressed
LOC_Os01g14900	1-8348126	0.00356285	glycerol-3-phosphate_acyltransferase,_putative,_expressed
LOC_Os02g54220	2-33242385	0.00356442	retrotransposon_protein,_putative,_unclassified,_expressed
LOC_Os02g26349	2-15475095	0.00356473	transposon_protein,_putative,_CACTA,_En/Spm_sub-class,_expressed
LOC_Os02g17620	2-10137716	0.00356605	isochorismatase_family_protein,_putative,_expressed
LOC_Os01g66379	1-38547565	0.00356757	expressed_protein
LOC_Os05g15760	5-8898112	0.00356898	retrotransposon_protein,_putative,_unclassified
LOC_Os09g11890	9-6674510	0.00357087	expressed_protein
LOC_Os06g03514	6-1356179	0.0035713	expressed_protein
LOC_Os03g46681	3-26421151	0.00357445	expressed_protein
LOC_Os03g46730	3-26443228	0.00357445	expressed_protein
LOC_Os03g46740	3-26445479	0.00357445	ABC_transporter,_ATP-binding_protein,_putative,_expressed
LOC_Os10g02210	10-763693	0.00358068	peptide_transporter_PTR2,_putative,_expressed
LOC_Os08g09710	8-5609368	0.00358225	OsFBX271_-_F-box_domain_containing_protein,_expressed
LOC_Os05g08230	5-4480169	0.00358819	expressed_protein
LOC_Os01g18040	1-10093428	0.00358889	retrotransposon_protein,_putative,_unclassified,_expressed
LOC_Os01g70090	1-40563712	0.00359167	enoyl-CoA_hydratase/isomerase_family_protein,_putative,_expressed
LOC_Os02g49120	2-30039302	0.00359203	retrotransposon_protein,_putative,_unclassified,_expressed
LOC_Os12g25950	12-15067590	0.00359358	expressed_protein
LOC_Os02g17610	2-10134305	0.0035941	expressed_protein
LOC_Os03g04600	3-2146016	0.00359412	expressed_protein
LOC_Os03g04410	3-2027331	0.0035975	aconitate_hydratase_protein,_putative,_expressed
LOC_Os06g30080	6-17333838	0.00359973	retrotransposon_protein,_putative,_Ty3-gypsy_subclass,_expressed
LOC_Os01g24830	1-13985225	0.00359978	expressed_protein
LOC_Os09g04970	9-2674040	0.00360044	retrotransposon_protein,_putative,_Ty3-gypsy_subclass,_expressed
LOC_Os03g29430	3-16771750	0.003601	retrotransposon_protein,_putative,_unclassified
LOC_Os08g23220	8-14019970	0.00360568	expressed_protein
LOC_Os05g28670	5-16817977	0.00361035	retrotransposon_protein,_putative,_unclassified,_expressed
LOC_Os11g24824	11-14158794	0.00361309	expressed_protein
LOC_Os08g23740	8-14362911	0.00361418	OsSub55_-_Putative_Subtilisin_homologue,_expressed
LOC_Os11g14410	11-8090766	0.003615	polygalacturonase,_putative,_expressed
LOC_Os01g42520	1-24184124	0.00361556	expressed_protein
LOC_Os06g19680	6-11239346	0.00361793	zinc_finger,_C3HC4_type_domain_containing_protein,_expressed
LOC_Os03g38284	3-21248701	0.00362159	retrotransposon_protein,_putative,_unclassified,_expressed
LOC_Os12g36530	12-22372423	0.00362576	patatin,_putative,_expressed
LOC_Os06g28310	6-16083770	0.00363111	retrotransposon_protein,_putative,_unclassified,_expressed
LOC_Os02g01490	2-279795	0.0036363	expressed_protein
LOC_Os08g04040	8-1961246	0.00363661	retrotransposon_protein,_putative,_unclassified,_expressed
LOC_Os08g04500	8-2210064	0.0036374	terpene_synthase,_putative,_expressed
LOC_Os09g36950	9-21316108	0.00363817	expressed_protein
LOC_Os11g14300	11-8018374	0.00363968	la_domain_containing_protein,_expressed
LOC_Os11g22100	11-12689807	0.00364268	retrotransposon_protein,_putative,_Ty3-gypsy_subclass,_expressed
LOC_Os09g34860	9-20317688	0.00365545	hydrolase,_alpha/beta_fold_family_domain_containing_protein,_expressed
LOC_Os07g28370	7-16573689	0.00365635	retrotransposon_protein,_putative,_unclassified,_expressed
LOC_Os09g06380	9-3002890	0.00365707	retrotransposon,_putative,_centromere-specific
LOC_Os02g17650	2-10157083	0.00365777	tocopherol_cyclase,_chloroplast_precursor,_putative,_expressed
LOC_Os07g32820	7-19634459	0.00365965	expressed_protein
LOC_Os06g49220	6-29824343	0.00366034	peptide_transporter,_putative,_expressed
LOC_Os08g35250	8-22242268	0.0036609	transposon_protein,_putative,_CACTA,_En/Spm_sub-class
LOC_Os08g32860	8-20372232	0.00366372	hypothetical_protein
LOC_Os06g42600	6-25618613	0.00366464	retrotransposon_protein,_putative,_unclassified,_expressed
LOC_Os01g55830	1-32149173	0.00366727	glutathione_S-transferase,_putative,_expressed
LOC_Os04g45420	4-26862182	0.00366901	retrotransposon_protein,_putative,_unclassified,_expressed
LOC_Os05g49720	5-28511775	0.00367285	retrotransposon_protein,_putative,_unclassified,_expressed
LOC_Os08g20020	8-11985541	0.00367442	octicosapeptide/Phox/Bem1p,_putative,_expressed
LOC_Os05g12160	5-6949222	0.00367539	expressed_protein
LOC_Os02g31860	2-18818223	0.00367843	expressed_protein
LOC_Os01g50370	1-28922111	0.0036811	STE_MEKK_ste11_MAP3K.4_-_STE_kinases_include_homologs_to_sterile_7,_sterile_11_and_sterile_20_from_yeast,_expressed
LOC_Os07g33340	7-19927619	0.00368196	DEAD-box_ATP-dependent_RNA_helicase,_putative,_expressed
LOC_Os10g38040	10-20375295	0.00368477	lysM_domain_containing_protein,_putative,_expressed
LOC_Os01g08410	1-4125427	0.00368523	early_fruit_mRNA,_putative,_expressed
LOC_Os03g01216	3-143471	0.00369453	phosphatidylserine_decarboxylase,_putative,_expressed
LOC_Os06g29994	6-17262119	0.00369776	MATE_efflux_family_protein,_putative,_expressed
LOC_Os09g12320	9-7023372	0.00369884	retrotransposon_protein,_putative,_unclassified,_expressed
LOC_Os09g12350	9-7045620	0.00369884	expressed_protein
LOC_Os09g27770	9-16898305	0.0037025	retrotransposon_protein,_putative,_Ty3-gypsy_subclass,_expressed
LOC_Os08g24010	8-14521852	0.00370442	retrotransposon_protein,_putative,_unclassified
LOC_Os08g12449	8-7364408	0.00370522	expressed_protein
LOC_Os04g35230	4-21409594	0.00370556	expressed_protein
LOC_Os03g03570	3-1562486	0.00371334	leucine-rich_repeat_transmembrane_protein_kinase,_putative,_expressed
LOC_Os11g40540	11-24186905	0.00371789	transporter_family_protein,_putative,_expressed
LOC_Os02g10860	2-5760277	0.00371914	bZIP_transcription_factor_domain_containing_protein,_expressed
LOC_Os03g04230	3-1946202	0.00371946	transposon_protein,_putative,_unclassified,_expressed
LOC_Os03g46690	3-26425620	0.00372192	OsFBX105_-_F-box_domain_containing_protein,_expressed
LOC_Os10g35110	10-18734918	0.00373194	alpha-galactosidase_precursor,_putative,_expressed
LOC_Os06g30560	6-17683204	0.00373308	transposon_protein,_putative,_CACTA,_En/Spm_sub-class,_expressed
LOC_Os02g50440	2-30795428	0.00373368	retrotransposon_protein,_putative,_unclassified,_expressed
LOC_Os09g24420	9-14521666	0.00373778	retrotransposon_protein,_putative,_Ty1-copia_subclass,_expressed
LOC_Os01g43250	1-24707482	0.00373813	WD_domain,_G-beta_repeat_domain_containing_protein,_expressed
LOC_Os09g10270	9-5595228	0.003739	SKP1-like_protein_1B,_putative,_expressed
LOC_Os12g37810	12-23219720	0.00374423	retrotransposon_protein,_putative,_unclassified,_expressed
LOC_Os01g04680	1-2106057	0.00374636	retrotransposon_protein,_putative,_unclassified,_expressed
LOC_Os08g24120	8-14568710	0.00374656	retrotransposon_protein,_putative,_unclassified,_expressed
LOC_Os08g21860	8-13084172	0.00374931	retrotransposon_protein,_putative,_Ty3-gypsy_subclass,_expressed
LOC_Os06g22480	6-13066912	0.00375062	retrotransposon_protein,_putative,_Ty3-gypsy_subclass,_expressed
LOC_Os08g12640	8-7475813	0.00375172	retrotransposon_protein,_putative,_Ty3-gypsy_subclass,_expressed
LOC_Os02g52560	2-32166813	0.00375187	xyloglucan_fucosyltransferase,_putative,_expressed
LOC_Os01g43350	1-24786317	0.00375537	protein_kinase_family_protein,_putative,_expressed
LOC_Os08g13940	8-8348496	0.00375722	expressed_protein
LOC_Os10g24700	10-12698541	0.00375806	retrotransposon_protein,_putative,_Ty3-gypsy_subclass,_expressed
LOC_Os11g30970	11-18019611	0.00375842	retrotransposon_protein,_putative,_unclassified,_expressed
LOC_Os03g26870	3-15334873	0.0037724	WD-40_repeat_family_protein,_putative,_expressed
LOC_Os05g06814	5-3561005	0.00377471	expressed_protein
LOC_Os01g03490	1-1404325	0.00377913	heavy-metal-associated_domain-containing_protein,_putative,_expressed
LOC_Os08g01600	8-357158	0.00378119	polygalacturonase,_putative,_expressed
LOC_Os02g25220	2-14667016	0.00378171	retrotransposon_protein,_putative,_unclassified,_expressed
LOC_Os07g22800	7-12864777	0.00378331	retrotransposon_protein,_putative,_Ty1-copia_subclass,_expressed
LOC_Os08g41350	8-26125117	0.00379052	FAD-binding_domain-containing_protein,_putative,_expressed
LOC_Os04g44270	4-26225082	0.00379164	retrotransposon_protein,_putative,_unclassified,_expressed
LOC_Os03g22810	3-13180846	0.00379453	copper/zinc_superoxide_dismutase,_putative,_expressed
LOC_Os08g01274	8-181843	0.00379735	expressed_protein
LOC_Os08g06090	8-3326458	0.00379871	zinc_finger,_C3HC4_type_domain_containing_protein,_expressed
LOC_Os02g15340	2-8583183	0.00380043	no_apical_meristem_protein,_putative,_expressed
LOC_Os11g07200	11-3607041	0.00380085	receptor_protein_kinase_CLAVATA1_precursor,_putative,_expressed
LOC_Os03g33240	3-19019450	0.00380417	retrotransposon_protein,_putative,_unclassified,_expressed
LOC_Os08g17130	8-10483178	0.0038138	transposon_protein,_putative,_CACTA,_En/Spm_sub-class,_expressed
LOC_Os12g18710	12-10815118	0.00381424	expressed_protein
LOC_Os12g43520	12-26998086	0.0038155	cbbY_protein-related,_putative,_expressed
LOC_Os06g19520	6-11112775	0.00381837	transposon_protein,_putative,_CACTA,_En/Spm_sub-class,_expressed
LOC_Os12g22240	12-12533316	0.00382079	retrotransposon_protein,_putative,_unclassified,_expressed
LOC_Os02g07640	2-3964034	0.00382196	expressed_protein
LOC_Os09g03920	9-2003176	0.00382248	retrotransposon_protein,_putative,_Ty3-gypsy_subclass,_expressed
LOC_Os08g12990	8-7709441	0.00382311	retrotransposon_protein,_putative,_unclassified,_expressed
LOC_Os04g43390	4-25662561	0.00382338	Os4bglu16_-_monolignol_beta-glucoside_homologue,_expressed
LOC_Os12g43490	12-26979994	0.00382425	thaumatin,_putative,_expressed
LOC_Os02g25260	2-14705959	0.00382495	retrotransposon_protein,_putative,_unclassified,_expressed
LOC_Os04g43464	4-25719128	0.00382957	retrotransposon_protein,_putative,_Ty3-gypsy_subclass,_expressed
LOC_Os04g24220	4-13867293	0.00383449	OsWAK32_-_OsWAK_receptor-like_protein_kinase,_expressed
LOC_Os02g02040	2-568665	0.00383605	protein_kinase,_putative,_expressed
LOC_Os03g31930	3-18258730	0.00383756	retrotransposon_protein,_putative,_Ty3-gypsy_subclass,_expressed
LOC_Os10g40590	10-21751859	0.00384592	oxysterol-binding_protein,_putative,_expressed
LOC_Os02g17640	2-10155468	0.00385006	isochorismatase_family_protein,_putative,_expressed
LOC_Os01g60470	1-34970366	0.00385084	retrotransposon_protein,_putative,_unclassified,_expressed
LOC_Os01g60480	1-34971641	0.00385084	retrotransposon_protein,_putative,_unclassified,_expressed
LOC_Os09g02400	9-993707	0.00385186	RNA-binding_region_RNP-1,_putative,_expressed
LOC_Os06g25230	6-14759817	0.00385316	retrotransposon_protein,_putative,_unclassified,_expressed
LOC_Os03g20390	3-11541616	0.0038565	expressed_protein
LOC_Os04g55630	4-33114769	0.00386146	expressed_protein
LOC_Os06g40230	6-23963927	0.00386945	expressed_protein
LOC_Os11g19440	11-11183865	0.00386987	retrotransposon_protein,_putative,_unclassified
LOC_Os09g20090	9-12031592	0.00387314	L-ascorbate_oxidase_precursor,_putative,_expressed
LOC_Os04g55660	4-33133206	0.00387366	GDSL-like_lipase/acylhydrolase,_putative,_expressed
LOC_Os04g02860	4-1113757	0.00387943	disease_resistance_protein_RPM1,_putative,_expressed
LOC_Os09g32040	9-19122265	0.00388138	no_apical_meristem_protein,_putative,_expressed
LOC_Os05g18240	5-10491987	0.00388266	retrotransposon_protein,_putative,_Ty3-gypsy_subclass,_expressed
LOC_Os08g16030	8-9780726	0.0038857	expressed_protein
LOC_Os08g25570	8-15556202	0.00388812	histone_deacetylase,_putative,_expressed
LOC_Os10g38489	10-20557697	0.00388852	glutathione_S-transferase_GSTU6,_putative,_expressed
LOC_Os04g20180	4-11249553	0.00388888	expressed_protein
LOC_Os09g21130	9-12754803	0.00388979	expressed_protein
LOC_Os01g41300	1-23368325	0.00389703	expressed_protein
LOC_Os08g20200	8-12117415	0.00389779	male_sterility_protein,_putative,_expressed
LOC_Os01g59050	1-34133042	0.003898	cytochrome_P450,_putative,_expressed
LOC_Os02g21340	2-12667732	0.00389906	ABC-2_type_transporter_family_protein,_expressed
LOC_Os09g02805	9-1289897	0.00389953	expressed_protein
LOC_Os01g39190	1-22047378	0.00390199	retrotransposon_protein,_putative,_unclassified,_expressed
LOC_Os06g27880	6-15806273	0.00390513	retrotransposon_protein,_putative,_unclassified,_expressed
LOC_Os04g21750	4-12308082	0.00390552	retrotransposon_protein,_putative,_Ty3-gypsy_subclass,_expressed
LOC_Os03g15140	3-8272399	0.00390642	retrotransposon_protein,_putative,_unclassified,_expressed
LOC_Os11g35220	11-20651452	0.00391159	OsWAK117_-_OsWAK_receptor-like_cytoplasmic_kinase_OsWAK-RLCK,_expressed
LOC_Os01g50240	1-28865066	0.00391231	expressed_protein
LOC_Os10g35360	10-18898882	0.00391978	expressed_protein
LOC_Os10g25900	10-13422470	0.00392087	dirigent,_putative,_expressed
LOC_Os03g49120	3-27979489	0.00392561	transposon_protein,_putative,_unclassified,_expressed
LOC_Os02g46240	2-28198344	0.00392712	retrotransposon_protein,_putative,_Ty3-gypsy_subclass,_expressed
LOC_Os01g01689	1-336662	0.00392832	phosphatidylinositol_3-_and_4-kinase_family_protein,_expressed
LOC_Os03g54070	3-30999220	0.00392867	expressed_protein
LOC_Os02g25740	2-15068936	0.00393057	retrotransposon_protein,_putative,_Ty3-gypsy_subclass,_expressed
LOC_Os05g11140	5-6274857	0.00393319	CK1_CaseinKinase_1a.5_-_CK1_includes_the_casein_kinase_1_kinases,_expressed
LOC_Os02g19780	2-11570649	0.00393522	expressed_protein
LOC_Os01g11920	1-6472229	0.00393719	retrotransposon_protein,_putative,_unclassified,_expressed
LOC_Os11g34290	11-20087331	0.00393772	retrotransposon_protein,_putative,_Ty3-gypsy_subclass,_expressed
LOC_Os03g04630	3-2171021	0.00394304	cytochrome_P450_protein,_putative,_expressed
LOC_Os04g56780	4-33861248	0.00394483	homeobox_domain_containing_protein,_expressed
LOC_Os07g07130	7-3520085	0.00394884	expressed_protein
LOC_Os01g46169	1-26251285	0.00395304	GDSL-like_lipase/acylhydrolase,_putative,_expressed
LOC_Os06g49850	6-30180156	0.00395887	expressed_protein
LOC_Os01g49400	1-28406849	0.00396594	expressed_protein
LOC_Os11g11280	11-6247232	0.00396738	retrotransposon_protein,_putative,_unclassified,_expressed
LOC_Os04g01210	4-147739	0.00397195	retrotransposon_protein,_putative,_Ty3-gypsy_subclass,_expressed
LOC_Os04g11080	4-6029349	0.00397224	retrotransposon_protein,_putative,_unclassified,_expressed
LOC_Os03g05550	3-2764134	0.00397448	expressed_protein
LOC_Os10g43075	10-23200493	0.00397467	expressed_protein
LOC_Os11g04300	11-1790330	0.00397476	retrotransposon_protein,_putative,_unclassified,_expressed
LOC_Os02g44190	2-26748542	0.00397678	retrotransposon_protein,_putative,_Ty3-gypsy_subclass
LOC_Os06g33290	6-19382417	0.00397686	retrotransposon_protein,_putative,_Ty3-gypsy_subclass,_expressed
LOC_Os03g33110	3-18948299	0.00397791	retrotransposon_protein,_putative,_unclassified,_expressed
LOC_Os09g03830	9-1941309	0.00398039	retrotransposon_protein,_putative,_Ty3-gypsy_subclass,_expressed
LOC_Os10g39320	10-20983991	0.00398178	aspartic_proteinase_nepenthesin_precursor,_putative,_expressed
LOC_Os06g49810	6-30138068	0.00398355	glycosyl_transferase_family_8,_putative,_expressed
LOC_Os07g10810	7-5879095	0.00398937	expressed_protein
LOC_Os02g54770	2-33543900	0.00399236	RNA_recognition_motif_containing_protein,_expressed
LOC_Os08g07840	8-4398965	0.00399415	PolI-like_DNA_polymerase,_putative,_expressed
LOC_Os02g01950	2-521296	0.0039946	transposon_protein,_putative,_unclassified,_expressed
LOC_Os11g25660	11-14641376	0.00399851	retrotransposon_protein,_putative,_Ty3-gypsy_subclass
LOC_Os11g19330	11-11074561	0.00399992	transposon_protein,_putative,_CACTA,_En/Spm_sub-class,_expressed
LOC_Os05g11080	5-6223994	0.00400087	transposon_protein,_putative,_CACTA,_En/Spm_sub-class,_expressed
LOC_Os02g19990	2-11758672	0.00400169	reticulon_domain_containing_protein,_putative,_expressed
LOC_Os09g12300	9-7016005	0.00400379	serine/threonine-protein_kinase_NAK,_putative,_expressed
LOC_Os09g03860	9-1953182	0.00400721	retrotransposon_protein,_putative,_unclassified,_expressed
LOC_Os03g03820	3-1717781	0.00401178	adenylate_kinase,_putative,_expressed
LOC_Os11g16640	11-9229473	0.00401362	transposon_protein,_putative,_CACTA,_En/Spm_sub-class,_expressed
LOC_Os01g27240	1-15195252	0.00401513	12-oxophytodienoate_reductase,_putative,_expressed
LOC_Os09g29880	9-18168131	0.00401696	expressed_protein
LOC_Os01g73390	1-42532279	0.00401697	expressed_protein
LOC_Os01g73480	1-42582980	0.00401913	acetyltransferase,_GNAT_family_protein,_expressed
LOC_Os01g06990	1-3298123	0.00402258	POEI36_-_Pollen_Ole_e_I_allergen_and_extensin_family_protein_precursor,_putative,_expressed
LOC_Os05g23970	5-13803322	0.0040281	retrotransposon_protein,_putative,_unclassified,_expressed
LOC_Os09g04020	9-2062104	0.00402912	transposon_protein,_putative,_CACTA,_En/Spm_sub-class,_expressed
LOC_Os08g22650	8-13626254	0.00403033	retrotransposon_protein,_putative,_Ty3-gypsy_subclass,_expressed
LOC_Os03g04000	3-1822319	0.00403595	AMP-binding_domain_containing_protein,_expressed
LOC_Os02g01310	2-169481	0.00404337	invertase/pectin_methylesterase_inhibitor_family_protein,_putative,_expressed
LOC_Os12g24040	12-13664726	0.00404382	glycosyl_hydrolase_family_9_protein,_expressed
LOC_Os01g48590	1-27865636	0.00404421	expressed_protein
LOC_Os07g38620	7-23194220	0.00404768	pyridoxamine_5'-phosphate_oxidase_family_protein,_putative,_expressed
LOC_Os02g58690	2-35859688	0.00405371	retrotransposon_protein,_putative,_unclassified
LOC_Os11g22670	11-13044216	0.00406179	retrotransposon_protein,_putative,_unclassified,_expressed
LOC_Os11g25880	11-14750513	0.00406344	expressed_protein
LOC_Os02g21830	2-12978255	0.004065	expressed_protein
LOC_Os01g40499	1-22884541	0.00406837	S-locus_lectin_protein_kinase_family_protein,_putative,_expressed
LOC_Os02g41880	2-25175503	0.00407177	expressed_protein
LOC_Os01g73490	1-42585238	0.00408636	expressed_protein
LOC_Os11g13990	11-7755056	0.00408676	AAA-type_ATPase_family_protein,_putative,_expressed
LOC_Os03g03920	3-1791589	0.00408966	Ubiquitin_family_domain_containing_protein,_expressed
LOC_Os03g03930	3-1798709	0.00408966	tRNA_nucleotidyltransferase/polyA_polymerase_family_protein,_putative,_expressed
LOC_Os09g32480	9-19389875	0.00409076	expressed_protein
LOC_Os08g18930	8-11282676	0.00409239	expressed_protein
LOC_Os11g29410	11-17077663	0.00409394	expressed_protein
LOC_Os08g45100	8-28317271	0.0040953	expressed_protein
LOC_Os11g43950	11-26545335	0.00409751	dnaJ_domain_containing_protein,_expressed
LOC_Os04g11720	4-6422887	0.00409786	retrotransposon_protein,_putative,_unclassified
LOC_Os01g49430	1-28425815	0.0041013	DnaK_family_protein,_putative,_expressed
LOC_Os07g45480	7-27137037	0.00410137	expressed_protein
LOC_Os04g19770	4-11043755	0.00410228	retrotransposon_protein,_putative,_unclassified
LOC_Os10g37840	10-20257981	0.00410273	CCB2,_putative,_expressed
LOC_Os01g54250	1-31215757	0.00410395	retrotransposon_protein,_putative,_unclassified,_expressed
LOC_Os04g41660	4-24701574	0.00410408	transposon_protein,_putative,_CACTA,_En/Spm_sub-class,_expressed
LOC_Os03g05830	3-2925766	0.0041059	transposon_protein,_putative,_CACTA,_En/Spm_sub-class,_expressed
LOC_Os01g49065	1-28195724	0.00410601	expressed_protein
LOC_Os09g07500	9-3751038	0.00410621	expressed_protein
LOC_Os05g35650	5-21173507	0.00410631	peptide_transporter_PTR2,_putative,_expressed
LOC_Os08g01740	8-445621	0.00410635	VHS_and_GAT_domain_containing_protein,_expressed
LOC_Os02g28520	2-16877400	0.00410687	retrotransposon_protein,_putative,_Ty1-copia_subclass,_expressed
LOC_Os03g20410	3-11547608	0.0041075	aquaporin_SIP2-1,_putative,_expressed
LOC_Os03g20600	3-11667542	0.00410916	expressed_protein
LOC_Os01g73380	1-42528097	0.00411053	retrotransposon_protein,_putative,_Ty1-copia_subclass,_expressed
LOC_Os01g50460	1-28976215	0.00411103	nodulin_MtN3_family_protein,_putative,_expressed
LOC_Os11g13950	11-7721201	0.00411119	hypothetical_protein
LOC_Os02g01560	2-316707	0.00411194	40S_ribosomal_protein_S4,_putative,_expressed
LOC_Os05g12740	5-7309471	0.00411205	transposon_protein,_putative,_unclassified,_expressed
LOC_Os04g31330	4-18741149	0.00411347	exo70_exocyst_complex_subunit_domain_containing_protein,_expressed
LOC_Os09g30446	9-18544255	0.00411768	transporter,_monovalent_cation:proton_antiporter-2_family,_putative,_expressed
LOC_Os02g27500	2-16271465	0.00411841	Leucine_Rich_Repeat_family_protein,_expressed
LOC_Os03g03900	3-1776273	0.00412235	NIN,_putative,_expressed
LOC_Os12g43300	12-26874805	0.00412679	expressed_protein
LOC_Os02g25720	2-15060657	0.00412841	transposon_protein,_putative,_CACTA,_En/Spm_sub-class,_expressed
LOC_Os06g39040	6-23184270	0.00412949	dehydrogenase/reductase_SDR_family_member_12,_putative,_expressed
LOC_Os03g63870	3-36093941	0.00413142	expressed_protein
LOC_Os05g45830	5-26547091	0.00413248	expressed_protein
LOC_Os04g53190	4-31671271	0.00413265	CPuORF12_-_conserved_peptide_uORF-containing_transcript,_expressed
LOC_Os04g53195	4-31671271	0.00413265	expressed_protein
LOC_Os08g28760	8-17595025	0.00413607	transposon_protein,_putative,_CACTA,_En/Spm_sub-class,_expressed
LOC_Os10g25870	10-13402791	0.00413611	dirigent,_putative,_expressed
LOC_Os09g37230	9-21492434	0.00413893	protein_kinase_family_protein,_putative,_expressed
LOC_Os01g55974	1-32234901	0.00413928	deoxycytidylate_deaminase,_putative,_expressed
LOC_Os08g10570	8-6219713	0.00413995	bifunctional_purine_biosynthesis_protein_purH,_putative,_expressed
LOC_Os07g47590	7-28452763	0.0041438	expressed_protein
LOC_Os09g03780	9-1917798	0.00414395	expressed_protein
LOC_Os03g30270	3-17276114	0.00414749	retrotransposon,_putative,_centromere-specific,_expressed
LOC_Os11g28050	11-16126797	0.00415547	transposon_protein,_putative,_CACTA,_En/Spm_sub-class,_expressed
LOC_Os12g18840	12-10918191	0.00415665	retrotransposon_protein,_putative,_unclassified,_expressed
LOC_Os04g08340	4-4454028	0.0041585	OsSigP3_-_Putative_Type_I_Signal_Peptidase_homologue;_employs_a_putative_Ser/Lys_catalytic_dyad,_expressed
LOC_Os12g36770	12-22533259	0.00416022	lipase_class_3_family_protein,_putative,_expressed
LOC_Os09g08980	9-4775333	0.00416173	retrotransposon_protein,_putative,_unclassified
LOC_Os12g08970	12-4696227	0.00416355	hypothetical_protein
LOC_Os10g38340	10-20489579	0.00416549	glutathione_S-transferase_GSTU6,_putative,_expressed
LOC_Os01g41730	1-23626966	0.0041695	serine/threonine-protein_kinase,_putative,_expressed
LOC_Os03g26550	3-15166062	0.0041707	hypothetical_protein
LOC_Os08g22500	8-13557588	0.00417228	retrotransposon_protein,_putative,_Ty3-gypsy_subclass
LOC_Os10g32520	10-17030983	0.00417962	expressed_protein
LOC_Os04g53330	4-31765528	0.00417971	RNA_recognition_motif_containing_protein,_putative,_expressed
LOC_Os03g31546	3-17983558	0.00418179	expressed_protein
LOC_Os06g43150	6-25938382	0.00418458	retrotransposon_protein,_putative,_unclassified,_expressed
LOC_Os11g29720	11-17234381	0.00418479	cytochrome_P450,_putative,_expressed
LOC_Os02g07760	2-4044632	0.00419149	aldehyde_dehydrogenase,_putative,_expressed
LOC_Os12g18670	12-10790607	0.00419182	expressed_protein
LOC_Os03g05812	3-2908224	0.00419227	expressed_protein
LOC_Os11g36070	11-21203918	0.00419245	expressed_protein
LOC_Os03g22760	3-13149098	0.00419393	hypothetical_protein
LOC_Os08g21380	8-12755095	0.00419455	retrotransposon_protein,_putative,_unclassified,_expressed
LOC_Os01g27320	1-15246702	0.00419472	retrotransposon_protein,_putative,_Ty3-gypsy_subclass,_expressed
LOC_Os10g26800	10-14038610	0.00419507	hypothetical_protein
LOC_Os03g23200	3-13410189	0.00419585	retrotransposon_protein,_putative,_Ty3-gypsy_subclass,_expressed
LOC_Os08g28410	8-17347264	0.00419944	retinal_pigment_epithelial_membrane_protein,_expressed
LOC_Os01g67350	1-39099513	0.00420141	cysteine_protease,_putative,_expressed
LOC_Os06g18970	6-10792383	0.00420355	expressed_protein
LOC_Os10g35810	10-19149830	0.00420691	thylakoid_lumenal_protein,_putative,_expressed
LOC_Os02g38000	2-22959963	0.00420927	retrotransposon_protein,_putative,_unclassified,_expressed
LOC_Os02g34820	2-20873736	0.00420992	hypothetical_protein
LOC_Os06g30810	6-17869457	0.0042106	OsMADS75_-_MADS-box_family_gene_with_M-alpha_type-box,_expressed
LOC_Os11g07800	11-3983600	0.00421073	retrotransposon_protein,_putative,_unclassified,_expressed
LOC_Os09g20270	9-12159435	0.00421124	expressed_protein
LOC_Os02g25340	2-14775941	0.00421382	retrotransposon,_putative,_centromere-specific
LOC_Os01g13630	1-7642622	0.00421636	retrotransposon_protein,_putative,_unclassified,_expressed
LOC_Os04g43410	4-25691797	0.00421653	Os4bglu18_-_monolignol_beta-glucoside_homologue,_expressed
LOC_Os10g41970	10-22569319	0.00421894	methyltransferase,_putative,_expressed
LOC_Os10g30330	10-15753290	0.00421977	expansin_precursor,_putative,_expressed
LOC_Os07g46930	7-28054651	0.00422071	sex_determination_protein_tasselseed-2,_putative,_expressed
LOC_Os03g36120	3-20039269	0.00422072	retrotransposon_protein,_putative,_unclassified,_expressed
LOC_Os09g04450	9-2364721	0.00422241	expressed_protein
LOC_Os06g49240	6-29829926	0.00422929	PTR-like_peptide_transporter,_putatuve,_expressed
LOC_Os01g60510	1-34994195	0.0042338	expressed_protein
LOC_Os06g02580	6-909123	0.00423995	high-affinity_nickel-transport_family_protein,_putative,_expressed
LOC_Os09g23120	9-13673671	0.00424109	retrotransposon_protein,_putative,_Ty3-gypsy_subclass,_expressed
LOC_Os11g26680	11-15283739	0.00424425	transposon_protein,_putative,_CACTA,_En/Spm_sub-class,_expressed
LOC_Os07g32774	7-19598948	0.00424561	chorismate_mutase/prephenate_dehydratase,_putative,_expressed
LOC_Os06g01140	6-122584	0.00425076	expressed_protein
LOC_Os03g46760	3-26452368	0.00425315	hypothetical_protein
LOC_Os04g52730	4-31403492	0.00425504	NAD_dependent_epimerase/dehydratase_family_domain_containing_protein,_expressed
LOC_Os10g26220	10-13582699	0.00425638	retrotransposon_protein,_putative,_Ty3-gypsy_subclass,_expressed
LOC_Os09g07330	9-3645711	0.00426779	transposon_protein,_putative,_CACTA,_En/Spm_sub-class,_expressed
LOC_Os08g45120	8-28327861	0.00427089	expressed_protein
LOC_Os12g19350	12-11223704	0.00427386	expressed_protein
LOC_Os03g44550	3-25082962	0.00427652	retrotransposon_protein,_putative,_unclassified,_expressed
LOC_Os10g38750	10-20639581	0.00427732	transposon_protein,_putative,_Mutator_sub-class,_expressed
LOC_Os08g22320	8-13452808	0.0042802	retrotransposon_protein,_putative,_unclassified,_expressed
LOC_Os02g36780	2-22180674	0.00428115	mTERF_domain_containing_protein,_expressed
LOC_Os01g68340	1-39711144	0.00428196	retrotransposon_protein,_putative,_unclassified,_expressed
LOC_Os05g22400	5-12711288	0.00428295	retrotransposon_protein,_putative,_Ty3-gypsy_subclass
LOC_Os07g14570	7-8312034	0.00428506	retrotransposon_protein,_putative,_unclassified,_expressed
LOC_Os10g13470	10-7279502	0.00428547	retrotransposon_protein,_putative,_Ty3-gypsy_subclass,_expressed
LOC_Os07g44560	7-26605925	0.00428947	AMP-binding_domain_containing_protein,_expressed
LOC_Os05g29700	5-17168629	0.00429156	retrotransposon,_putative,_centromere-specific,_expressed
LOC_Os08g44040	8-27725600	0.00429196	rhamnogalacturonate_lyase,_putative,_expressed
LOC_Os01g49154	1-28246614	0.00429726	expressed_protein
LOC_Os08g28730	8-17576229	0.00429885	NAD_dependent_epimerase/dehydratase_family_protein,_putative,_expressed
LOC_Os04g10140	4-5479145	0.00430326	hypothetical_protein
LOC_Os11g15500	11-8780116	0.00430473	stripe_rust_resistance_protein_Yr10,_putative,_expressed
LOC_Os08g29370	8-18023854	0.0043104	peptidyl-prolyl_cis-trans_isomerase,_chloroplast_precursor,_putative,_expressed
LOC_Os04g43250	4-25586287	0.00431107	retrotransposon_protein,_putative,_unclassified,_expressed
LOC_Os11g22710	11-13069274	0.00431386	retrotransposon_protein,_putative,_unclassified,_expressed
LOC_Os03g48360	3-27531742	0.00431632	retrotransposon_protein,_putative,_unclassified,_expressed
LOC_Os05g24040	5-13858097	0.00431732	retrotransposon_protein,_putative,_unclassified
LOC_Os03g48410	3-27568225	0.00431777	hypothetical_protein
LOC_Os08g18150	8-11127978	0.00432212	WD_domain,_G-beta_repeat_domain_containing_protein,_expressed
LOC_Os09g27780	9-16900472	0.00432394	retrotransposon_protein,_putative,_unclassified,_expressed
LOC_Os12g18830	12-10910535	0.00432496	retrotransposon_protein,_putative,_unclassified,_expressed
LOC_Os01g73370	1-42527002	0.00432627	S-locus_lectin_protein_kinase_family_protein,_putative,_expressed
LOC_Os03g26080	3-14940311	0.0043276	nucleoside-triphosphatase,_putative,_expressed
LOC_Os03g05980	3-2986566	0.00433183	40S_ribosomal_protein_S9-2,_putative,_expressed
LOC_Os08g18960	8-11306396	0.00433188	transposon_protein,_putative,_unclassified,_expressed
LOC_Os11g14020	11-7788231	0.00433215	transposon_protein,_putative,_unclassified,_expressed
LOC_Os04g19760	4-11039185	0.00433285	retrotransposon_protein,_putative,_unclassified,_expressed
LOC_Os01g52140	1-29997030	0.0043412	expressed_protein
LOC_Os09g04780	9-2544834	0.00434285	retrotransposon_protein,_putative,_unclassified
LOC_Os07g44080	7-26348457	0.0043473	expressed_protein
LOC_Os09g16940	9-10359195	0.00435036	retrotransposon_protein,_putative,_Ty1-copia_subclass,_expressed
LOC_Os01g21670	1-12157930	0.00435078	plant_protein_of_unknown_function_domain_containing_protein,_expressed
LOC_Os09g32600	9-19456154	0.00435375	OsFBX334_-_F-box_domain_containing_protein,_expressed
LOC_Os04g43130	4-25529747	0.00435421	transcriptional_corepressor_LEUNIG,_putative,_expressed
LOC_Os04g18190	4-10055672	0.00435786	retrotransposon,_putative,_centromere-specific,_expressed
LOC_Os10g14180	10-7687100	0.00435836	expressed_protein
LOC_Os01g60640	1-35063191	0.00436157	WRKY21,_expressed
LOC_Os01g07120	1-3358041	0.00436238	AP2_domain_containing_protein,_expressed
LOC_Os02g25820	2-15131078	0.00436433	B3_DNA_binding_domain_containing_protein,_expressed
LOC_Os05g06170	5-3096929	0.00436648	FAR1_family_protein,_expressed
LOC_Os10g23980	10-12289650	0.00436657	expressed_protein
LOC_Os01g34630	1-19100099	0.00436696	retrotransposon_protein,_putative,_Ty1-copia_subclass,_expressed
LOC_Os06g03740	6-1476427	0.00437054	folic_acid_binding_protein,_putative,_expressed
LOC_Os03g04380	3-2015773	0.00437144	LYR_motif_containing_protein,_putative,_expressed
LOC_Os03g04390	3-2015773	0.00437144	pentatricopeptide,_putative,_expressed
LOC_Os05g09716	5-5494029	0.00437605	transposon_protein,_putative,_CACTA,_En/Spm_sub-class,_expressed
LOC_Os04g04750	4-2284667	0.00437753	peroxidase_precursor,_putative,_expressed
LOC_Os01g55990	1-32240452	0.00437801	expressed_protein
LOC_Os08g09280	8-5390299	0.00438253	hypothetical_protein
LOC_Os06g49460	6-29969075	0.00438794	Rer1_protein,_putative,_expressed
LOC_Os08g29240	8-17925986	0.00438833	retrotransposon_protein,_putative,_Ty3-gypsy_subclass,_expressed
LOC_Os09g02360	9-970482	0.00439553	cyclin,_putative,_expressed
LOC_Os04g19780	4-11047941	0.0044019	retrotransposon_protein,_putative,_unclassified,_expressed
LOC_Os07g33330	7-19921242	0.00440703	RNA_recognition_motif_containing_protein,_putative,_expressed
LOC_Os05g24290	5-14052559	0.00441162	retrotransposon_protein,_putative,_Ty3-gypsy_subclass,_expressed
LOC_Os09g06464	9-3055762	0.00441195	CCT/B-box_zinc_finger_protein,_putative,_expressed
LOC_Os09g36540	9-21071293	0.00441478	retrotransposon_protein,_putative,_unclassified,_expressed
LOC_Os08g10300	8-6002855	0.00442251	SHR5-receptor-like_kinase,_putative,_expressed
LOC_Os02g21009	2-12438580	0.00442467	sodium/calcium_exchanger_protein,_putative,_expressed
LOC_Os03g32499	3-18582100	0.00442757	expressed_protein
LOC_Os01g01730	1-390363	0.00442821	serine/arginine_repetitive_matrix_protein_2,_putative,_expressed
LOC_Os06g14270	6-7961843	0.00443273	retrotransposon_protein,_putative,_unclassified
LOC_Os02g25810	2-15121335	0.00444024	retrotransposon_protein,_putative,_unclassified,_expressed
LOC_Os10g35560	10-19024731	0.00444177	expressed_protein
LOC_Os01g32250	1-17668949	0.00444292	retrotransposon_protein,_putative,_unclassified,_expressed
LOC_Os02g27010	2-15879963	0.0044431	retrotransposon_protein,_putative,_unclassified,_expressed
LOC_Os02g46580	2-28406526	0.00444431	retrotransposon_protein,_putative,_Ty3-gypsy_subclass,_expressed
LOC_Os10g16824	10-8384043	0.00444897	transposon_protein,_putative,_CACTA,_En/Spm_sub-class,_expressed
LOC_Os06g14260	6-7954490	0.00445289	lectin-like_receptor_kinase,_putative,_expressed
LOC_Os02g25050	2-14526466	0.00445906	expressed_protein
LOC_Os03g05920	3-2965281	0.00446065	expressed_protein
LOC_Os07g31500	7-18690942	0.00446133	leucine-rich_repeat_receptor_protein_kinase_EXS_precursor,_putative,_expressed
LOC_Os05g34760	5-20622876	0.00446602	expressed_protein
LOC_Os05g02340	5-755199	0.00447098	retrotransposon_protein,_putative,_Ty3-gypsy_subclass,_expressed
LOC_Os05g50120	5-28725092	0.00447559	CGMC_MAPKCMGC_2.3_-_CGMC_includes_CDA,_MAPK,_GSK3,_and_CLKC_kinases,_expressed
LOC_Os11g24090	11-13695426	0.00447753	transposon_protein,_putative,_CACTA,_En/Spm_sub-class,_expressed
LOC_Os03g31992	3-18299713	0.00448136	retrotransposon_protein,_putative,_Ty3-gypsy_subclass
LOC_Os06g08480	6-4173450	0.00448219	CHD3-type_chromatin-remodeling_factor_PICKLE,_putative,_expressed
LOC_Os10g39510	10-21106478	0.00448583	expressed_protein
LOC_Os11g39750	11-23702065	0.00448813	expressed_protein
LOC_Os03g03860	3-1737981	0.0044912	expressed_protein
LOC_Os08g16990	8-10403861	0.00449715	retrotransposon_protein,_putative,_Ty1-copia_subclass,_expressed
LOC_Os11g19120	11-10908641	0.00449753	retrotransposon_protein,_putative,_unclassified,_expressed
LOC_Os02g57560	2-35264072	0.00449907	tyrosine_protein_kinase_domain_containing_protein,_putative,_expressed
LOC_Os12g18729	12-10823369	0.0045077	expressed_protein
LOC_Os10g24620	10-12636164	0.00450996	retrotransposon_protein,_putative,_Ty3-gypsy_subclass,_expressed
LOC_Os06g22350	6-12977645	0.00451088	expressed_protein
LOC_Os01g60820	1-35172566	0.00451136	hypothetical_protein
LOC_Os10g32900	10-17222855	0.00451278	CCT_motif_family_protein,_expressed
LOC_Os09g32510	9-19407107	0.00451697	BHLH_transcription_factor,_putative,_expressed
LOC_Os09g32520	9-19413398	0.00451697	60S_ribosomal_protein_L32,_putative,_expressed
LOC_Os05g18050	5-10381326	0.00451994	retrotransposon_protein,_putative,_unclassified
LOC_Os11g29490	11-17109635	0.00452373	plasma_membrane_ATPase,_putative,_expressed
LOC_Os08g42360	8-26741435	0.00453122	hypothetical_protein
LOC_Os08g42370	8-26745939	0.00453122	zinc_finger_DHHC_domain-containing_protein,_putative,_expressed
LOC_Os12g29580	12-17630301	0.0045369	AGC_PVPK_like_kin82y.19_-_ACG_kinases_include_homologs_to_PKA,_PKG_and_PKC,_expressed
LOC_Os11g20510	11-11887402	0.00453767	retrotransposon_protein,_putative,_Ty3-gypsy_subclass,_expressed
LOC_Os09g25980	9-15599584	0.00454628	glutamate_receptor_2.6_precursor,_putative,_expressed
LOC_Os11g18990	11-10825724	0.00454723	histidine_triad_family_protein,_putative,_expressed
LOC_Os01g49740	1-28573939	0.00454951	expressed_protein
LOC_Os08g45080	8-28299207	0.00455056	expressed_protein
LOC_Os08g45090	8-28311579	0.00455056	expressed_protein
LOC_Os04g53470	4-31838880	0.0045545	expressed_protein
LOC_Os01g55570	1-32014415	0.00455719	expressed_protein
LOC_Os01g04450	1-1980279	0.00456022	OsWAK2_-_OsWAK_receptor-like_cytoplasmic_kinase_OsWAK-RLCK,_expressed
LOC_Os01g18140	1-10160559	0.00456244	expressed_protein
LOC_Os06g11120	6-5831011	0.00456501	expressed_protein
LOC_Os05g39270	5-23028194	0.00457245	retrotransposon_protein,_putative,_Ty3-gypsy_subclass,_expressed
LOC_Os11g02020	11-542015	0.00457274	retrotransposon_protein,_putative,_Ty3-gypsy_subclass,_expressed
LOC_Os03g33080	3-18926642	0.00457391	transposon_protein,_putative,_CACTA,_En/Spm_sub-class,_expressed
LOC_Os03g34040	3-19416351	0.00457437	ribosomal_protein,_putative,_expressed
LOC_Os03g34150	3-19453070	0.00457437	retrotransposon_protein,_putative,_unclassified,_expressed
LOC_Os03g36710	3-20356116	0.00457437	retrotransposon_protein,_putative,_unclassified,_expressed
LOC_Os11g44930	11-27198529	0.00457592	pentatricopeptide_repeat_domain_containing_protein,_putative,_expressed
LOC_Os12g35810	12-21828929	0.0045766	retrotransposon_protein,_putative,_Ty1-copia_subclass,_expressed
LOC_Os08g13560	8-8056072	0.00457974	retrotransposon_protein,_putative,_unclassified,_expressed
LOC_Os03g32870	3-18804181	0.0045801	retrotransposon_protein,_putative,_unclassified
LOC_Os08g17259	8-10561440	0.00458244	retrotransposon_protein,_putative,_unclassified
LOC_Os09g28320	9-17196410	0.00458614	expressed_protein
LOC_Os05g32920	5-19290219	0.00458686	expressed_protein
LOC_Os01g49750	1-28575818	0.00458758	expressed_protein
LOC_Os07g39340	7-23568135	0.00458984	transposon_protein,_putative,_unclassified,_expressed
LOC_Os02g48900	2-29911518	0.00459736	aspartic_proteinase_nepenthesin-1_precursor,_putative,_expressed
LOC_Os12g43450	12-26960675	0.00459798	thaumatin_family_domain_containing_protein,_expressed
LOC_Os09g32580	9-19445284	0.00459989	expressed_protein
LOC_Os02g45990	2-28026024	0.00460577	retrotransposon_protein,_putative,_unclassified,_expressed
LOC_Os08g16940	8-10374559	0.00460621	ZOS8-01_-_C2H2_zinc_finger_protein,_expressed
LOC_Os12g26770	12-15686420	0.00460972	retrotransposon_protein,_putative,_Ty3-gypsy_subclass,_expressed
LOC_Os01g73310	1-42484178	0.00462038	actin,_putative,_expressed
LOC_Os12g18400	12-10646621	0.00462053	retrotransposon_protein,_putative,_unclassified,_expressed
LOC_Os11g41770	11-25101871	0.004622	expressed_protein
LOC_Os03g12250	3-6437595	0.00462355	atypical_receptor-like_kinase_MARK,_putative,_expressed
LOC_Os09g02729	9-1228616	0.00462379	phospholipase_C,_putative,_expressed
LOC_Os06g39440	6-23414874	0.0046239	amidophosphoribosyltransferase,_chloroplast_precursor,_putative,_expressed
LOC_Os12g05110	12-2249621	0.00462416	pyruvate_kinase,_putative,_expressed
LOC_Os11g19864	11-11444015	0.00462524	transposon_protein,_putative,_Pong_sub-class,_expressed
LOC_Os03g14380	3-7820737	0.00462881	autophagy_protein_9,_putative,_expressed
LOC_Os01g71320	1-41310702	0.00462995	hexokinase,_putative,_expressed
LOC_Os02g01800	2-443058	0.00463446	receptor-like_protein_kinase_precursor,_putative,_expressed
LOC_Os08g41460	8-26176400	0.00463794	expressed_protein
LOC_Os11g15140	11-8535408	0.00463933	retrotransposon,_putative,_centromere-specific,_expressed
LOC_Os08g04540	8-2256689	0.00463985	decarboxylase,_putative,_expressed
LOC_Os08g45050	8-28287956	0.00464255	expressed_protein
LOC_Os06g35550	6-20737769	0.00464271	retrotransposon_protein,_putative,_Ty1-copia_subclass,_expressed
LOC_Os01g39490	1-22256117	0.00464321	expressed_protein
LOC_Os09g07000	9-3392238	0.00464362	retrotransposon_protein,_putative,_Ty3-gypsy_subclass,_expressed
LOC_Os03g47830	3-27168371	0.00464762	argonaute,_putative,_expressed
LOC_Os04g43150	4-25544324	0.00465063	nuclear_transport_factor_2,_putative,_expressed
LOC_Os06g03790	6-1513391	0.00465458	39S_ribosomal_protein_L47,_mitochondrial_precursor,_putative,_expressed
LOC_Os06g30340	6-17523494	0.00465586	retrotransposon_protein,_putative,_Ty3-gypsy_subclass,_expressed
LOC_Os11g33060	11-19545641	0.00465621	retrotransposon_protein,_putative,_unclassified,_expressed
LOC_Os03g48990	3-27901222	0.00465985	retrotransposon_protein,_putative,_Ty3-gypsy_subclass,_expressed
LOC_Os09g32680	9-19499304	0.00466667	cyclin,_putative,_expressed
LOC_Os09g25934	9-15574223	0.00466886	expressed_protein
LOC_Os05g14600	5-8321849	0.00466913	retrotransposon_protein,_putative,_unclassified,_expressed
LOC_Os04g54150	4-32260965	0.00466916	retrotransposon_protein,_putative,_unclassified,_expressed
LOC_Os02g18690	2-10898423	0.0046706	BURP_domain_containing_protein,_expressed
LOC_Os03g30110	3-17186856	0.00467239	retrotransposon_protein,_putative,_Ty3-gypsy_subclass,_expressed
LOC_Os11g42500	11-25594844	0.00467406	dirigent,_putative,_expressed
LOC_Os05g33100	5-19412318	0.00467581	endo-1,3;1,4-beta-D-glucanase_precursor,_putative,_expressed
LOC_Os05g50850	5-29164628	0.00467617	expressed_protein
LOC_Os05g22290	5-12619706	0.00467715	retrotransposon,_putative,_centromere-specific,_expressed
LOC_Os01g55890	1-32187493	0.00467778	amino_acid_kinase,_putative,_expressed
LOC_Os06g22240	6-12904938	0.00468009	retrotransposon_protein,_putative,_Ty3-gypsy_subclass,_expressed
LOC_Os04g19520	4-10871641	0.00468058	retrotransposon_protein,_putative,_Ty3-gypsy_subclass
LOC_Os06g20700	6-11921696	0.00468206	retrotransposon_protein,_putative,_unclassified
LOC_Os02g12390	2-6457077	0.00468221	retrotransposon_protein,_putative,_Ty1-copia_subclass,_expressed
LOC_Os09g03850	9-1949983	0.00468322	expressed_protein
LOC_Os04g43324	4-25629780	0.00468407	G-patch_domain_containing_protein,_putative,_expressed
LOC_Os08g17390	8-10630384	0.00468457	expressed_protein
LOC_Os09g32025	9-19118393	0.00468783	uroporphyrinogen-III_synthase,_putative,_expressed
LOC_Os02g17960	2-10407615	0.00468791	transposon_protein,_putative,_CACTA,_En/Spm_sub-class,_expressed
LOC_Os03g57808	3-32941053	0.00468909	transposon_protein,_putative,_CACTA,_En/Spm_sub-class,_expressed
LOC_Os09g04470	9-2382113	0.00468909	retrotransposon_protein,_putative,_Ty3-gypsy_subclass
LOC_Os03g37500	3-20805493	0.00469009	retrotransposon_protein,_putative,_unclassified,_expressed
LOC_Os02g23880	2-13834485	0.00469017	retrotransposon,_putative,_centromere-specific
LOC_Os08g42420	8-26787196	0.00469122	expressed_protein
LOC_Os08g37540	8-23774280	0.00469518	retrotransposon_protein,_putative,_Ty3-gypsy_subclass,_expressed
LOC_Os01g27660	1-15430399	0.00469685	transposon_protein,_putative,_CACTA,_En/Spm_sub-class,_expressed
LOC_Os06g49640	6-30034970	0.00469985	uncharacterized_UPF0114_domain_containing_protein,_expressed
LOC_Os03g03190	3-1350764	0.00470004	expressed_protein
LOC_Os09g27760	9-16890685	0.00470652	retrotransposon_protein,_putative,_Ty3-gypsy_subclass,_expressed
LOC_Os04g21030	4-11826442	0.00470864	retrotransposon_protein,_putative,_unclassified,_expressed
LOC_Os11g04690	11-1999320	0.00471348	zinc_finger,_C3HC4_type_domain_containing_protein,_expressed
LOC_Os11g04760	11-2027809	0.00471348	expressed_protein
LOC_Os03g35860	3-19885137	0.0047136	retrotransposon_protein,_putative,_Ty3-gypsy_subclass,_expressed
LOC_Os08g13970	8-8383453	0.00471609	transposon_protein,_putative,_unclassified,_expressed
LOC_Os03g14700	3-7993242	0.00471905	C2_domain_containing_protein,_expressed
LOC_Os05g10710	5-5894149	0.00472048	retrotransposon_protein,_putative,_unclassified,_expressed
LOC_Os05g46430	5-26903450	0.00472802	60S_ribosomal_protein_L28-1,_putative,_expressed
LOC_Os01g45910	1-26078252	0.00472828	plastidic_ATP/ADP-transporter,_putative,_expressed
LOC_Os04g07990	4-4251822	0.00473274	transposon_protein,_putative,_CACTA,_En/Spm_sub-class
LOC_Os01g45914	1-26087575	0.00473303	expressed_protein
LOC_Os06g36110	6-21138353	0.00473392	retrotransposon_protein,_putative,_Ty3-gypsy_subclass,_expressed
LOC_Os02g22790	2-13576679	0.00473522	retrotransposon_protein,_putative,_Ty3-gypsy_subclass,_expressed
LOC_Os01g73400	1-42537779	0.00473655	hypothetical_protein
LOC_Os08g29200	8-17904491	0.00473932	BURP_domain_containing_protein,_expressed
LOC_Os10g42830	10-23099738	0.00474069	transporter_family_protein,_putative,_expressed
LOC_Os04g05080	4-2511501	0.00474149	vacuolar_ATP_synthase_subunit_F,_putative,_expressed
LOC_Os03g26070	3-14936682	0.00474166	expressed_protein
LOC_Os08g04190	8-2034637	0.00474212	homeobox_and_START_domains_containing_protein,_putative,_expressed
LOC_Os09g34060	9-20094673	0.00474381	transcription_factor_RF2a,_putative,_expressed
LOC_Os02g25920	2-15210333	0.00474532	retrotransposon_protein,_putative,_Ty3-gypsy_subclass,_expressed
LOC_Os10g13610	10-7378397	0.00474708	retrotransposon_protein,_putative,_unclassified,_expressed
LOC_Os11g41410	11-24850395	0.0047487	expressed_protein
LOC_Os01g10790	1-5761427	0.00474969	WD_domain,_G-beta_repeat_domain_containing_protein,_expressed
LOC_Os05g14900	5-8461791	0.00475083	expressed_protein
LOC_Os12g27130	12-15924635	0.00475086	retrotransposon_protein,_putative,_Ty3-gypsy_subclass
LOC_Os08g17784	8-10900261	0.00475105	purple_acid_phosphatase,_putative,_expressed
LOC_Os08g12910	8-7676563	0.00475335	retrotransposon_protein,_putative,_unclassified,_expressed
LOC_Os01g73460	1-42571313	0.00475958	ATXR,_putative,_expressed
LOC_Os01g56000	1-32241236	0.00476427	RNA_recognition_motif_containing_protein,_expressed
LOC_Os02g25330	2-14769863	0.00476593	transposon_protein,_putative,_CACTA,_En/Spm_sub-class,_expressed
LOC_Os05g51200	5-29367602	0.00476706	retrotransposon_protein,_putative,_Ty1-copia_subclass,_expressed
LOC_Os08g38092	8-24132840	0.00477156	abhydrolase_domain-containing_protein_FAM108C1,_putative,_expressed
LOC_Os01g45940	1-26095330	0.0047741	hypothetical_protein
LOC_Os10g33010	10-17285253	0.0047789	retrotransposon_protein,_putative,_unclassified,_expressed
LOC_Os02g28050	2-16616093	0.00478134	hypothetical_protein
LOC_Os03g20530	3-11630891	0.00478227	DUF630/DUF632_domains_containing_protein,_putative,_expressed
LOC_Os12g13700	12-7724309	0.00478459	hypothetical_protein
LOC_Os02g36840	2-22231483	0.00478469	cytokinin-O-glucosyltransferase_2,_putative,_expressed
LOC_Os02g50610	2-30908623	0.00478485	retrotransposon_protein,_putative,_Ty3-gypsy_subclass,_expressed
LOC_Os11g06800	11-3331362	0.00478696	retrotransposon_protein,_putative,_unclassified,_expressed
LOC_Os03g04450	3-2066495	0.00478767	expressed_protein
LOC_Os09g06910	9-3325976	0.00478841	retrotransposon_protein,_putative,_unclassified,_expressed
LOC_Os03g04430	3-2057511	0.00478926	protein_phosphatase_2C,_putative,_expressed
LOC_Os07g32630	7-19462776	0.0047893	UDP-glucoronosyl_and_UDP-glucosyl_transferase_domain_containing_protein,_expressed
LOC_Os07g27310	7-15877156	0.00479328	CRAL/TRIO_domain_containing_protein,_expressed
LOC_Os03g16530	3-9113400	0.00479388	retrotransposon_protein,_putative,_unclassified,_expressed
LOC_Os12g42610	12-26484069	0.00479455	YABBY_domain_containing_protein,_putative,_expressed
LOC_Os02g48770	2-29850691	0.00479707	SAM_dependent_carboxyl_methyltransferase,_putative,_expressed
LOC_Os11g24150	11-13729461	0.00480419	retrotransposon_protein,_putative,_Ty3-gypsy_subclass,_expressed
LOC_Os01g51980	1-29875533	0.00480458	alliin_lyase_precursor,_putative,_expressed
LOC_Os08g17860	8-10952954	0.00480481	transposon_protein,_putative,_Pong_sub-class,_expressed
LOC_Os05g16180	5-9146478	0.00480858	NB-ARC_domain_containing_protein,_expressed
LOC_Os11g22160	11-12719465	0.00481004	retrotransposon_protein,_putative,_unclassified,_expressed
LOC_Os08g17150	8-10503756	0.00481574	expressed_protein
LOC_Os07g29240	7-17137950	0.0048188	expressed_protein
LOC_Os08g24500	8-14796613	0.00482358	retrotransposon_protein,_putative,_Ty3-gypsy_subclass,_expressed
LOC_Os08g45000	8-28244980	0.00482702	inorganic_phosphate_transporter,_putative,_expressed
LOC_Os01g04005	1-1733934	0.00482778	expressed_protein
LOC_Os08g03940	8-1874616	0.0048318	retrotransposon_protein,_putative,_unclassified,_expressed
LOC_Os07g15120	7-8675753	0.00483564	transposon_protein,_putative,_unclassified
LOC_Os06g10850	6-5658383	0.00483664	lipase,_putative,_expressed
LOC_Os04g11980	4-6568414	0.00483961	expressed_protein
LOC_Os02g22050	2-13113822	0.00484017	retrotransposon_protein,_putative,_unclassified,_expressed
LOC_Os06g06430	6-2999776	0.0048402	expressed_protein
LOC_Os03g53390	3-30632892	0.0048465	expressed_protein
LOC_Os01g50290	1-28876479	0.00485033	expressed_protein
LOC_Os01g50280	1-28874580	0.00485213	expressed_protein
LOC_Os01g50320	1-28886383	0.00485213	surp_module_family_protein,_putative,_expressed
LOC_Os01g50340	1-28893309	0.00485213	transposon_protein,_putative,_unclassified,_expressed
LOC_Os05g22340	5-12643389	0.00485549	retrotransposon_protein,_putative,_Ty3-gypsy_subclass,_expressed
LOC_Os07g47570	7-28446039	0.00485989	expressed_protein
LOC_Os02g17180	2-9839013	0.00486002	OsFBX42_-_F-box_domain_containing_protein,_expressed
LOC_Os09g06290	9-2948077	0.00486267	retrotransposon,_putative,_centromere-specific,_expressed
LOC_Os08g19520	8-11673065	0.00486333	retrotransposon_protein,_putative,_unclassified,_expressed
LOC_Os08g06100	8-3338505	0.00486454	O-methyltransferase,_putative,_expressed
LOC_Os01g47850	1-27393855	0.00486483	transposon_protein,_putative,_unclassified,_expressed
LOC_Os04g08470	4-4567581	0.00486849	OsFBX116_-_F-box_domain_containing_protein,_expressed
LOC_Os10g08950	10-4843080	0.00487216	expressed_protein
LOC_Os03g46820	3-26476966	0.0048744	spidroin-1,_putative,_expressed
LOC_Os11g09070	11-4818640	0.00487613	expressed_protein
LOC_Os01g73300	1-42480843	0.00487774	VAMP-like_protein_YKT62,_putative,_expressed
LOC_Os01g19600	1-11107860	0.00487816	transposon_protein,_putative,_CACTA,_En/Spm_sub-class,_expressed
LOC_Os04g53200	4-31678952	0.00488129	exonuclease,_putative,_expressed
LOC_Os11g36280	11-21364702	0.00488374	transposon_protein,_putative,_CACTA,_En/Spm_sub-class,_expressed
LOC_Os08g21400	8-12764805	0.00488708	retrotransposon,_putative,_centromere-specific
LOC_Os05g07860	5-4246484	0.00488826	uvrB/uvrC_motif_family_protein,_expressed
LOC_Os05g37910	5-22215267	0.00489015	phosphatidic_acid_phosphatase-related,_putative,_expressed
LOC_Os10g28330	10-14740116	0.00489275	ZOS10-04_-_C2H2_zinc_finger_protein,_expressed
LOC_Os01g42610	1-24238428	0.00489438	terpene_synthase,_putative,_expressed
LOC_Os06g39912	6-23736932	0.00489494	expressed_protein
LOC_Os02g33370	2-19830373	0.00489506	retrotransposon_protein,_putative,_Ty3-gypsy_subclass,_expressed
LOC_Os04g07320	4-3888340	0.00489632	retrotransposon_protein,_putative,_Ty3-gypsy_subclass,_expressed
LOC_Os09g09420	9-5065380	0.00489977	transposon_protein,_putative,_CACTA,_En/Spm_sub-class,_expressed
LOC_Os09g03900	9-1992617	0.00490121	retrotransposon_protein,_putative,_unclassified,_expressed
LOC_Os09g31442	9-18938450	0.00490234	expressed_protein
LOC_Os05g17040	5-9718803	0.00490256	retrotransposon_protein,_putative,_unclassified,_expressed
LOC_Os08g19250	8-11513977	0.0049057	retrotransposon_protein,_putative,_Ty1-copia_subclass,_expressed
LOC_Os07g02140	7-686780	0.0049067	flavin-containing_monooxygenase_family_protein,_putative,_expressed
LOC_Os04g57950	4-34519645	0.00490908	dihydroorotate_dihydrogenase_protein,_putative,_expressed
LOC_Os03g08114	3-4145006	0.0049118	expressed_protein
LOC_Os01g31510	1-17234586	0.0049132	retrotransposon_protein,_putative,_Ty1-copia_subclass,_expressed
LOC_Os06g04790	6-2088885	0.00491511	HAD_superfamily_phosphatase,_putative,_expressed
LOC_Os07g44620	7-26628831	0.00491521	eukaryotic_translation_initiation_factor_6,_putative,_expressed
LOC_Os01g55860	1-32168074	0.00491733	expressed_protein
LOC_Os01g61950	1-35867178	0.00491834	expressed_protein
LOC_Os06g10780	6-5631848	0.00492408	AP2_domain_containing_protein,_expressed
LOC_Os10g19050	10-9702242	0.00492472	expressed_protein
LOC_Os08g17294	8-10567614	0.00493475	PSF3_-_Putative_GINS_complex_subunit,_expressed
LOC_Os10g21090	10-10700010	0.00493663	ATP_binding_protein,_putative,_expressed
LOC_Os08g44940	8-28213274	0.00493746	DUF260_domain_containing_protein,_putative,_expressed
LOC_Os09g13470	9-7800080	0.00494302	plant_protein_of_unknown_function_domain_containing_protein,_expressed
LOC_Os09g03390	9-1669770	0.00494318	expressed_protein
LOC_Os02g48510	2-29695953	0.00494333	hypothetical_protein
LOC_Os06g25320	6-14831411	0.00494397	retrotransposon_protein,_putative,_Ty3-gypsy_subclass,_expressed
LOC_Os12g35380	12-21512102	0.00494908	transposon_protein,_putative,_CACTA,_En/Spm_sub-class,_expressed
LOC_Os01g16290	1-9228901	0.00494997	DNA_gyrase_subunit_B,_chloroplast/mitochondrial_precursor,_putative,_expressed
LOC_Os03g35870	3-19888820	0.00495346	retrotransposon_protein,_putative,_Ty3-gypsy_subclass,_expressed
LOC_Os05g22750	5-12906125	0.00495556	retrotransposon_protein,_putative,_Ty3-gypsy_subclass,_expressed
LOC_Os03g01620	3-389983	0.00495592	expressed_protein
LOC_Os07g47480	7-28382634	0.00495997	heavy_metal-associated_domain_containing_protein,_expressed
LOC_Os07g01150	7-88380	0.00496092	fatty_acid_hydroxylase,_putative,_expressed
LOC_Os01g49010	1-28163004	0.00496376	ORC4_-_Putative_origin_recognition_complex_subunit_4,_expressed
LOC_Os11g25980	11-14828553	0.00496637	phospholipid-transporting_ATPase_2,_putative,_expressed
LOC_Os08g22520	8-13566265	0.00496701	retrotransposon_protein,_putative,_unclassified,_expressed
LOC_Os01g42234	1-23929436	0.00496846	amino_acid_permease_family_protein,_putative,_expressed
LOC_Os04g48640	4-28981836	0.00496935	retrotransposon_protein,_putative,_Ty3-gypsy_subclass,_expressed
LOC_Os07g03020	7-1134469	0.00497023	expressed_protein
LOC_Os10g11034	10-6108872	0.00497329	caffeine-induced_death_protein_1,_putative,_expressed
LOC_Os09g11930	9-6710022	0.00497521	expressed_protein
LOC_Os01g55690	1-32076818	0.00497719	glutelin,_putative,_expressed
[truncated: 3,267 more rows]

## Sheet: Supplementary Table 6
Supplementary Table 6| List of putative candidate genes extracted from MSU rice data base using GWAS significant SNPs (p<0.001) associated with number of spiketels per pancle used in network analysis
Putative Candiate Genes	SNP	P-value	Annotated function
LOC_Os08g16530	8-10119820	3.45032e-06	retrotransposon_protein,_putative,_unclassified,_expressed
LOC_Os12g07820	12-3958459	5.73993e-06	OsAPx6_-_Stromal_Ascorbate_Peroxidase_encoding_gene_5,8,_expressed
LOC_Os11g26680	11-15283739	6.76066e-06	transposon_protein,_putative,_CACTA,_En/Spm_sub-class,_expressed
LOC_Os11g33070	11-19553713	3.47737e-05	retrotransposon_protein,_putative,_Ty3-gypsy_subclass,_expressed
LOC_Os08g16170	8-9855260	3.90692e-05	transposon_protein,_putative,_CACTA,_En/Spm_sub-class,_expressed
LOC_Os08g22320	8-13453660	4.15458e-05	retrotransposon_protein,_putative,_unclassified,_expressed
LOC_Os08g33760	8-21119334	4.53375e-05	transposon_protein,_putative,_CACTA,_En/Spm_sub-class,_expressed
LOC_Os11g15140	11-8535408	4.95965e-05	retrotransposon,_putative,_centromere-specific,_expressed
LOC_Os01g29320	1-16428639	5.53605e-05	retrotransposon_protein,_putative,_unclassified,_expressed
LOC_Os08g16260	8-9921643	5.88389e-05	cytochrome_P450_protein,_putative,_expressed
LOC_Os05g07930	5-4298698	5.92693e-05	retrotransposon_protein,_putative,_unclassified,_expressed
LOC_Os11g40680	11-24278817	6.85747e-05	MBTB64_-_Bric-a-Brac,_Tramtrack,_Broad_Complex_BTB_domain_with_Meprin_and_TRAF_Homology_MATH_domain,_expressed
LOC_Os02g28780	2-17028209	7.9725e-05	retrotransposon_protein,_putative,_Ty3-gypsy_subclass,_expressed
LOC_Os05g39270	5-23030515	7.9911e-05	retrotransposon_protein,_putative,_Ty3-gypsy_subclass,_expressed
LOC_Os11g05920	11-2780522	8.34577e-05	transposon_protein,_putative,_CACTA,_En/Spm_sub-class
LOC_Os08g16140	8-9840983	8.81232e-05	transposon_protein,_putative,_CACTA,_En/Spm_sub-class,_expressed
LOC_Os02g29570	2-17593654	9.08484e-05	retrotransposon_protein,_putative,_Ty3-gypsy_subclass,_expressed
LOC_Os11g40870	11-24449550	9.18156e-05	expressed_protein
LOC_Os01g50060	1-28756336	9.22348e-05	1-aminocyclopropane-1-carboxylate_deaminase,_putative,_expressed
LOC_Os01g11870	1-6425108	9.23916e-05	expressed_protein
LOC_Os05g24810	5-14383876	9.65102e-05	expressed_protein
LOC_Os11g40810	11-24422197	0.000108556	receptor_kinase,_putative,_expressed
LOC_Os01g50050	1-28752463	0.000108943	polyprenyl_synthetase,_putative,_expressed
LOC_Os08g16660	8-10190021	0.000113483	aspartic_proteinase_nepenthesin_precursor,_putative,_expressed
LOC_Os08g19190	8-11474082	0.000114467	conserved_hypothetical_protein
LOC_Os01g12090	1-6584099	0.000118634	ribosomal_protein_S6_family_protein,_putative,_expressed
LOC_Os08g16480	8-10098059	0.000126375	ATPase,_AFG1_family_domain_containing_protein,_expressed
LOC_Os08g16670	8-10199393	0.000133726	OsFBX280_-_F-box_domain_containing_protein,_expressed
LOC_Os08g16150	8-9845712	0.000135941	expressed_protein
LOC_Os01g12100	1-6587587	0.000139757	expressed_protein
LOC_Os08g23020	8-13862052	0.000168422	retrotransposon_protein,_putative,_unclassified,_expressed
LOC_Os04g59300	4-35264886	0.000172892	strictosidine_synthase,_putative,_expressed
LOC_Os01g11920	1-6472229	0.00017337	retrotransposon_protein,_putative,_unclassified,_expressed
LOC_Os08g16550	8-10127125	0.00018634	retrotransposon_protein,_putative,_unclassified
LOC_Os08g08810	8-5107766	0.000189764	expressed_protein
LOC_Os01g33970	1-18698864	0.000190155	transposon_protein,_putative,_CACTA,_En/Spm_sub-class,_expressed
LOC_Os10g42030	10-22597488	0.000201021	expressed_protein
LOC_Os01g49780	1-28589985	0.000209944	hypothetical_protein
LOC_Os04g24160	4-13815904	0.000215468	expressed_protein
LOC_Os01g72990	1-42336674	0.000228634	expressed_protein
LOC_Os05g48040	5-27542947	0.000232186	MATE_efflux_family_protein,_putative,_expressed
LOC_Os05g19900	5-11601146	0.000232409	retrotransposon_protein,_putative,_Ty3-gypsy_subclass,_expressed
LOC_Os06g04010	6-1638121	0.000235638	GAGA-binding_protein,_putative,_expressed
LOC_Os01g49430	1-28425815	0.000237052	DnaK_family_protein,_putative,_expressed
LOC_Os01g21034	1-11742719	0.000238044	pectinesterase,_putative,_expressed
LOC_Os09g28990	9-17624381	0.00024698	retrotransposon_protein,_putative,_Ty3-gypsy_subclass
LOC_Os11g26540	11-15211850	0.000251169	retrotransposon_protein,_putative,_Ty3-gypsy_subclass,_expressed
LOC_Os01g13760	1-7715452	0.000264139	dnaJ_domain_containing_protein,_expressed
LOC_Os08g21280	8-12699327	0.00026414	retrotransposon_protein,_putative,_Ty3-gypsy_subclass,_expressed
LOC_Os08g25350	8-15419081	0.000271733	transposon_protein,_putative,_unclassified,_expressed
LOC_Os01g49440	1-28433127	0.000275335	expressed_protein
LOC_Os06g29580	6-16954134	0.00028027	retrotransposon_protein,_putative,_Ty3-gypsy_subclass,_expressed
LOC_Os12g38310	12-23516922	0.000294023	mitochondrial_import_inner_membrane_translocase_subunit_Tim,_putative,_expressed
LOC_Os06g11120	6-5831009	0.000294112	expressed_protein
LOC_Os05g33700	5-19836540	0.000297816	4F5_protein_family_protein,_expressed
LOC_Os08g12970	8-7698584	0.000299082	expressed_protein
LOC_Os09g05120	9-2747749	0.000304384	retrotransposon,_putative,_centromere-specific,_expressed
LOC_Os08g21800	8-13047865	0.000315089	retrotransposon_protein,_putative,_unclassified,_expressed
LOC_Os03g46450	3-26272685	0.000321173	retrotransposon_protein,_putative,_Ty1-copia_subclass,_expressed
LOC_Os08g09500	8-5499905	0.000322988	retrotransposon_protein,_putative,_unclassified,_expressed
LOC_Os11g41160	11-24655805	0.000328821	phosphoserine_phosphatase,_chloroplast_precursor,_putative,_expressed
LOC_Os11g40674	11-24273905	0.000331224	expressed_protein
LOC_Os01g49790	1-28594972	0.000342723	expressed_protein
LOC_Os08g20480	8-12288027	0.000343709	OsFBO20_-_F-box_and_other_domain_containing_protein,_expressed
LOC_Os04g53220	4-31698104	0.000350627	signal_recognition_particle_14_kDa_protein,_putative,_expressed
LOC_Os03g36860	3-20453779	0.000352497	retrotransposon_protein,_putative,_unclassified,_expressed
LOC_Os01g06010	1-2872987	0.000354389	Core_histone_H2A/H2B/H3/H4_domain_containing_protein,_putative,_expressed
LOC_Os05g04240	5-1934166	0.000360002	GDSL-like_lipase/acylhydrolase,_putative,_expressed
LOC_Os05g47920	5-27467694	0.000361016	retrotransposon_protein,_putative,_Ty1-copia_subclass,_expressed
LOC_Os01g72870	1-42265431	0.000372537	BAS1,_putative,_expressed
LOC_Os05g48050	5-27547879	0.000377908	ribosomal_protein_L7/L12_C-terminal_domain_containing_protein,_expressed
LOC_Os01g49720	1-28569624	0.00038367	glutathione_S-transferase,_putative,_expressed
LOC_Os01g49740	1-28573939	0.00038367	expressed_protein
LOC_Os01g49770	1-28583398	0.00038367	zinc_finger,_C3HC4_type_domain_containing_protein,_expressed
LOC_Os01g12900	1-7164840	0.000385449	ras-related_protein,_putative,_expressed
LOC_Os06g29844	6-17198996	0.000389736	MATE_efflux_family_protein,_putative,_expressed
LOC_Os12g38290	12-23512617	0.000392144	metallothionein,_putative,_expressed
LOC_Os01g12110	1-6591064	0.000392808	expressed_protein
LOC_Os06g15870	6-9010625	0.000396933	retrotransposon_protein,_putative,_unclassified,_expressed
LOC_Os01g66379	1-38547565	0.00039798	expressed_protein
LOC_Os08g25860	8-15749767	0.000399933	expressed_protein
LOC_Os08g19180	8-11470205	0.000408408	transposon_protein,_putative,_unclassified,_expressed
LOC_Os06g03860	6-1557942	0.000412602	uncharacterized_membrane_protein,_putative,_expressed
LOC_Os04g50670	4-29990474	0.000416215	expressed_protein
LOC_Os08g20544	8-12332832	0.000424197	expressed_protein
LOC_Os08g23189	8-13990036	0.000424197	hypothetical_protein
LOC_Os11g41170	11-24671355	0.000424588	disease_resistance_protein_RPM1,_putative,_expressed
LOC_Os08g17700	8-10832180	0.000428265	retrotransposon_protein,_putative,_Ty1-copia_subclass,_expressed
LOC_Os05g18740	5-10863431	0.000430002	retrotransposon_protein,_putative,_unclassified,_expressed
LOC_Os11g35756	11-20989849	0.00043479	transposon_protein,_putative,_CACTA,_En/Spm_sub-class
LOC_Os07g19030	7-11269310	0.000439389	tic22-like_family_domain_containing_protein,_expressed
LOC_Os12g17780	12-10177350	0.000444694	retrotransposon_protein,_putative,_unclassified,_expressed
LOC_Os07g23370	7-13174962	0.000461735	retrotransposon_protein,_putative,_unclassified,_expressed
LOC_Os06g03740	6-1477230	0.000475396	folic_acid_binding_protein,_putative,_expressed
LOC_Os08g20420	8-12267406	0.000484189	MGD2,_putative,_expressed
LOC_Os11g16870	11-9363302	0.000487787	retrotransposon_protein,_putative,_Ty3-gypsy_subclass,_expressed
LOC_Os06g30670	6-17763006	0.000495194	retrotransposon_protein,_putative,_unclassified,_expressed
LOC_Os02g47460	2-28985384	0.000501102	expressed_protein
LOC_Os05g14420	5-8133016	0.000510366	transposon_protein,_putative,_CACTA,_En/Spm_sub-class,_expressed
LOC_Os07g26360	7-15153243	0.000527411	retrotransposon_protein,_putative,_Ty3-gypsy_subclass,_expressed
LOC_Os08g30330	8-18669524	0.000528528	transposon_protein,_putative,_CACTA,_En/Spm_sub-class,_expressed
LOC_Os07g33340	7-19931958	0.00053393	DEAD-box_ATP-dependent_RNA_helicase,_putative,_expressed
LOC_Os07g46960	7-28066662	0.000536048	expressed_protein
LOC_Os12g21860	12-12309604	0.000539201	expressed_protein
LOC_Os10g11454	10-6340045	0.000541448	transposon_protein,_putative,_CACTA,_En/Spm_sub-class,_expressed
LOC_Os12g08080	12-4110721	0.000546514	transposon_protein,_putative,_unclassified,_expressed
LOC_Os03g46780	3-26462246	0.00054799	expressed_protein
LOC_Os11g40640	11-24255096	0.000574488	transposon_protein,_putative,_unclassified,_expressed
LOC_Os11g37300	11-22028045	0.000576574	OsFBDUF53_-_F-box_and_DUF_domain_containing_protein,_expressed
LOC_Os05g52070	5-29899825	0.00058042	retrotransposon_protein,_putative,_Ty3-gypsy_subclass,_expressed
LOC_Os08g22890	8-13773541	0.00059188	retrotransposon_protein,_putative,_Ty3-gypsy_subclass
LOC_Os08g23050	8-13876553	0.000592802	retrotransposon_protein,_putative,_Ty3-gypsy_subclass,_expressed
LOC_Os05g10660	5-5831711	0.000606467	transposon_protein,_putative,_CACTA,_En/Spm_sub-class,_expressed
LOC_Os01g12890	1-7158276	0.000608001	expressed_protein
LOC_Os03g01410	3-293672	0.000608198	Leucine_Rich_Repeat_family_protein,_expressed
LOC_Os08g16610	8-10160526	0.000609261	Rad21_/_Rec8_like_protein,_putative,_expressed
LOC_Os05g01380	5-231231	0.000611021	polygalacturonase_inhibitor_precursor,_putative,_expressed
LOC_Os03g18420	3-10328213	0.000617092	CHCH_domain_containing_protein,_expressed
LOC_Os08g15310	8-9309135	0.000625644	transposon_protein,_putative,_CACTA,_En/Spm_sub-class,_expressed
LOC_Os03g46770	3-26460296	0.000625655	RNA_recognition_motif_containing_protein,_expressed
LOC_Os02g27870	2-16495302	0.000646205	expressed_protein
LOC_Os01g49460	1-28444582	0.000650415	hypothetical_protein
LOC_Os12g25494	12-14757277	0.000651883	transposon_protein,_putative,_unclassified,_expressed
LOC_Os01g49890	1-28654114	0.000652006	threonine_synthase,_chloroplast_precursor,_putative,_expressed
LOC_Os07g17790	7-10522853	0.000656669	retrotransposon_protein,_putative,_Ty3-gypsy_subclass
LOC_Os11g41130	11-24642598	0.000656696	vacuolar_protein_sorting-associated_protein_26,_putative,_expressed
LOC_Os01g12830	1-7100902	0.000658912	erythronate-4-phosphate_dehydrogenase_domain_containing_protein,_expressed
LOC_Os01g49529	1-28483889	0.000660781	OsWAK10d_-_OsWAK_receptor-like_cytoplasmic_kinase_OsWAK-RLCK,_expressed
LOC_Os10g07030	10-3683876	0.000662968	expressed_protein
LOC_Os05g24730	5-14334122	0.000663512	retrotransposon_protein,_putative,_unclassified
LOC_Os11g16248	11-8940103	0.000665255	retrotransposon_protein,_putative,_LINE_subclass,_expressed
LOC_Os08g21570	8-12849351	0.000665297	25.3_kDa_vesicle_transport_protein,_putative,_expressed
LOC_Os12g38280	12-23509843	0.000665423	retrotransposon_protein,_putative,_Ty3-gypsy_subclass,_expressed
LOC_Os08g33260	8-20721574	0.000669814	expressed_protein
LOC_Os01g73000	1-42351055	0.000670371	copine,_putative,_expressed
LOC_Os05g24160	5-13946617	0.000679784	double-stranded_RNA_binding_motif_containing_protein,_expressed
LOC_Os08g17330	8-10603791	0.000683204	expressed_protein
LOC_Os12g22400	12-12651304	0.000683312	retrotransposon_protein,_putative,_Ty3-gypsy_subclass,_expressed
LOC_Os01g49510	1-28480144	0.000685597	OsPOP3_-_Putative_Prolyl_Oligopeptidase_homologue,_expressed
LOC_Os04g11420	4-6240473	0.000691408	transposon_protein,_putative,_CACTA,_En/Spm_sub-class
LOC_Os11g03290	11-1225675	0.000693701	nucleoside-triphosphatase,_putative,_expressed
LOC_Os01g12930	1-7177403	0.00070332	U-box_domain_containing_protein,_expressed
LOC_Os04g23799	4-13601649	0.000709944	retrotransposon_protein,_putative,_Ty3-gypsy_subclass,_expressed
LOC_Os08g29124	8-17822734	0.000711416	expressed_protein
LOC_Os07g16290	7-9509462	0.000712822	retrotransposon_protein,_putative,_unclassified
LOC_Os04g53214	4-31693287	0.000718368	hydroxyacid_oxidase_1,_putative,_expressed
LOC_Os08g19120	8-11430947	0.000719718	retrotransposon_protein,_putative,_Ty1-copia_subclass,_expressed
LOC_Os08g22410	8-13522593	0.000722428	retrotransposon_protein,_putative,_unclassified,_expressed
LOC_Os07g34320	7-20563453	0.000725407	nodulin,_putative,_expressed
LOC_Os01g49750	1-28575818	0.000729403	expressed_protein
LOC_Os01g73234	1-42453469	0.000734663	thioredoxin,_putative,_expressed
LOC_Os08g16580	8-10142482	0.000741477	Cf2/Cf5_disease_resistance_protein,_putative,_expressed
LOC_Os12g38330	12-23524235	0.000746371	RALFL44_-_Rapid_ALkalinization_Factor_RALF_family_protein_precursor,_expressed
LOC_Os04g10140	4-5479145	0.000750287	hypothetical_protein
LOC_Os08g25340	8-15416865	0.00075072	hypothetical_protein
LOC_Os07g10170	7-5474494	0.000752952	expressed_protein
LOC_Os03g35560	3-19709717	0.000753205	retrotransposon_protein,_putative,_Ty1-copia_subclass,_expressed
LOC_Os04g40600	4-24104269	0.000755698	peptide_methionine_sulfoxide_reductase,_putative,_expressed
LOC_Os02g27000	2-15866443	0.000761033	ATP-binding_region,_ATPase-like_domain_containing_protein,_expressed
LOC_Os08g16630	8-10178357	0.000761904	OsFBX279_-_F-box_domain_containing_protein,_expressed
LOC_Os10g13480	10-7281649	0.000765839	retrotransposon_protein,_putative,_Ty3-gypsy_subclass
LOC_Os12g13020	12-7219045	0.000770484	transposon_protein,_putative,_CACTA,_En/Spm_sub-class,_expressed
LOC_Os02g29260	2-17383810	0.000782315	retrotransposon_protein,_putative,_unclassified,_expressed
LOC_Os04g35730	4-21770597	0.000791245	transposon_protein,_putative,_unclassified,_expressed
LOC_Os06g40230	6-23964788	0.000792199	expressed_protein
LOC_Os12g38260	12-23495787	0.000800273	expressed_protein
LOC_Os09g29584	9-17992677	0.000800822	OsWAK84_-_OsWAK_receptor-like__protein_OsWAK-RLP,_expressed
LOC_Os08g25250	8-15336952	0.000801295	retrotransposon_protein,_putative,_unclassified,_expressed
LOC_Os01g49560	1-28503117	0.000811764	expressed_protein
LOC_Os05g44500	5-25898874	0.000815212	retrotransposon_protein,_putative,_unclassified
LOC_Os08g16200	8-9875318	0.00081614	retrotransposon_protein,_putative,_unclassified,_expressed
LOC_Os08g24120	8-14568365	0.000818362	retrotransposon_protein,_putative,_unclassified,_expressed
LOC_Os05g05820	5-2916608	0.00081882	pro-resilin_precursor,_putative,_expressed
LOC_Os10g31020	10-16194750	0.000834434	retrotransposon_protein,_putative,_Ty1-copia_subclass,_expressed
LOC_Os11g29840	11-17321165	0.000842313	expressed_protein
LOC_Os11g40800	11-24414821	0.000844033	expressed_protein
LOC_Os03g46740	3-26445479	0.000844318	ABC_transporter,_ATP-binding_protein,_putative,_expressed
LOC_Os11g16610	11-9212036	0.000854245	retrotransposon_protein,_putative,_Ty1-copia_subclass,_expressed
LOC_Os12g43550	12-27023768	0.000863256	ras-related_protein,_putative,_expressed
LOC_Os01g72890	1-42275815	0.0008635	transposon_protein,_putative,_CACTA,_En/Spm_sub-class,_expressed
LOC_Os06g30650	6-17748794	0.00086373	expressed_protein
LOC_Os01g49000	1-28138646	0.000866499	katanin_p60_ATPase-containing_subunit,_putative,_expressed
LOC_Os09g10220	9-5569195	0.000870314	transposon_protein,_putative,_CACTA,_En/Spm_sub-class,_expressed
LOC_Os08g21670	8-12914630	0.000871641	expressed_protein
LOC_Os08g31340	8-19386665	0.00087411	heavy_metal-associated_domain_containing_protein,_expressed
LOC_Os02g01050	2-29937	0.000881554	retrotransposon_protein,_putative,_unclassified,_expressed
LOC_Os11g11660	11-6481577	0.000885307	expressed_protein
LOC_Os09g14260	9-8435351	0.000888072	transposon_protein,_putative,_CACTA,_En/Spm_sub-class,_expressed
LOC_Os03g32050	3-18327835	0.000898701	peroxidase_precursor,_putative,_expressed
LOC_Os02g45990	2-28026024	0.000903838	retrotransposon_protein,_putative,_unclassified,_expressed
LOC_Os01g12870	1-7127342	0.000906255	eukaryotic_translation_initiation_factor_3_subunit_E-interacting_protein,_putative,_expressed
LOC_Os01g29880	1-16739704	0.000910765	retrotransposon_protein,_putative,_unclassified,_expressed
LOC_Os08g17930	8-10999359	0.000920491	retrotransposon_protein,_putative,_Ty3-gypsy_subclass,_expressed
LOC_Os06g22090	6-12818787	0.000922696	retrotransposon_protein,_putative,_Ty1-copia_subclass,_expressed
LOC_Os08g25850	8-15744347	0.0009271	expressed_protein
LOC_Os02g25500	2-14890686	0.000929256	retrotransposon_protein,_putative,_Ty3-gypsy_subclass
LOC_Os05g01470	5-270064	0.000938174	methionine_S-methyltransferase,_putative,_expressed
LOC_Os09g02950	9-1382191	0.000939218	retrotransposon_protein,_putative,_unclassified,_expressed
LOC_Os01g55250	1-31799909	0.000940011	expressed_protein
LOC_Os05g17840	5-10262531	0.000941041	retrotransposon_protein,_putative,_Ty3-gypsy_subclass,_expressed
LOC_Os01g49910	1-28666452	0.00094562	expressed_protein
LOC_Os11g26080	11-14920757	0.000945849	transposon_protein,_putative,_CACTA,_En/Spm_sub-class,_expressed
LOC_Os01g73024	1-42369946	0.000947874	expressed_protein
LOC_Os10g34083	10-18191077	0.000948096	expressed_protein
LOC_Os04g59330	4-35279043	0.000950083	expressed_protein
LOC_Os12g32410	12-19551934	0.000951318	retrotransposon_protein,_putative,_unclassified
LOC_Os04g10260	4-5540893	0.000952017	basic_region_leucine_zipper_domain_containing_protein,_expressed
LOC_Os10g34150	10-18226263	0.00095351	nodulin,_putative,_expressed
LOC_Os08g25200	8-15313041	0.000956516	paired_amphipathic_helix_repeat-containing_protein,_putative,_expressed
LOC_Os01g02680	1-912676	0.000958403	protein_kinase_domain_containing_protein,_expressed
LOC_Os05g25160	5-14577756	0.000959803	transposon_protein,_putative,_CACTA,_En/Spm_sub-class,_expressed
LOC_Os05g01450	5-260335	0.000967556	eukaryotic_translation_initiation_factor_3_subunit_F,_putative,_expressed
LOC_Os08g25290	8-15359439	0.000973365	expressed_protein
LOC_Os05g01460	5-264195	0.000976698	STIP1_homology_and_U_box-containing_protein_1,_putative,_expressed
LOC_Os01g12810	1-7092123	0.000977689	retrotransposon_protein,_putative,_unclassified,_expressed
LOC_Os07g44040	7-26321855	0.000978554	ras-related_protein,_putative,_expressed
LOC_Os01g73310	1-42487247	0.000987862	actin,_putative,_expressed
LOC_Os11g40650	11-24259765	0.000993451	expressed_protein
LOC_Os01g13610	1-7619636	0.00099739	isoflavone_reductase_homolog_IRL,_putative,_expressed
LOC_Os03g14060	3-7640389	0.0010023	retrotransposon_protein,_putative,_Ty1-copia_subclass,_expressed
LOC_Os02g26014	2-15272270	0.00101188	terpene_synthase,_putative,_expressed
LOC_Os12g07440	12-3669737	0.00101778	expressed_protein
LOC_Os08g16920	8-10365379	0.00102037	expressed_protein
LOC_Os06g03600	6-1389763	0.00102383	transcriptional_corepressor_SEUSS,_putative,_expressed
LOC_Os01g07740	1-3714092	0.00102935	DEAD-box_ATP-dependent_RNA_helicase_14,_putative,_expressed
LOC_Os01g07750	1-3722482	0.00102935	expressed_protein
LOC_Os08g10260	8-5967585	0.00103071	NBS-LRR_disease_resistance_protein,_putative,_expressed
LOC_Os04g20800	4-11674539	0.00103397	pumilio_domain-containing_protein,_putative,_expressed
LOC_Os07g06410	7-3113953	0.0010342	deoxyribonuclease_tatD,_putative,_expressed
LOC_Os12g06680	12-3252140	0.00103777	retrotransposon_protein,_putative,_Ty3-gypsy_subclass,_expressed
LOC_Os03g22420	3-12847339	0.00103962	AAA-type_ATPase_family_protein,_putative,_expressed
LOC_Os11g27170	11-15643462	0.00104225	OsSCP58_-_Putative_Serine_Carboxypeptidase_homologue,_expressed
LOC_Os07g46870	7-28021019	0.00104439	sex_determination_protein_tasselseed-2,_putative,_expressed
LOC_Os08g15840	8-9628655	0.00104553	ankyrin_repeat-rich_protein,_putative,_expressed
LOC_Os08g16570	8-10138694	0.00104813	expressed_protein
LOC_Os01g09730	1-5016856	0.00106171	expressed_protein
LOC_Os02g30810	2-18372177	0.00106573	OsSAUR10_-_Auxin-responsive_SAUR_gene_family_member,_expressed
LOC_Os05g01030	5-63176	0.00106576	phospholipid-transporting_ATPase,_putative,_expressed
LOC_Os05g16590	5-9404790	0.00106724	transposon_protein,_putative,_CACTA,_En/Spm_sub-class,_expressed
LOC_Os08g24620	8-14879104	0.00106959	hypothetical_protein
LOC_Os04g50700	4-30002439	0.00108067	pathogenesis-related_Bet_v_I_family_protein,_putative,_expressed
LOC_Os11g02090	11-567356	0.00108966	expressed_protein
LOC_Os05g32090	5-18710776	0.00109464	expressed_protein
LOC_Os11g37900	11-22469627	0.00109922	3-ketoacyl-CoA_synthase,_putative,_expressed
LOC_Os06g11480	6-6082759	0.00110226	hypothetical_protein
LOC_Os06g11600	6-6148062	0.00111285	growth_regulator_related_protein,_putative,_expressed
LOC_Os08g23000	8-13856577	0.00112343	retrotransposon_protein,_putative,_Ty1-copia_subclass
LOC_Os08g25230	8-15330242	0.0011258	expressed_protein
LOC_Os01g08890	1-4483593	0.0011281	expressed_protein
LOC_Os01g41090	1-23271870	0.00112813	retrotransposon_protein,_putative,_unclassified,_expressed
LOC_Os12g17230	12-9866728	0.0011286	expressed_protein
LOC_Os01g39310	1-22120759	0.00113024	SEY1,_putative,_expressed
LOC_Os05g20840	5-12237988	0.0011326	retrotransposon_protein,_putative,_Ty3-gypsy_subclass,_expressed
LOC_Os11g40690	11-24303436	0.00114452	dehydrogenase,_putative,_expressed
LOC_Os08g19280	8-11535449	0.00114891	retrotransposon,_putative,_centromere-specific
LOC_Os02g51860	2-31767013	0.00114931	dehydration_response_related_protein,_putative,_expressed
LOC_Os01g23960	1-13481563	0.00115252	retrotransposon_protein,_putative,_Ty3-gypsy_subclass,_expressed
LOC_Os08g22760	8-13686171	0.00115284	retrotransposon_protein,_putative,_Ty3-gypsy_subclass,_expressed
LOC_Os01g13640	1-7648797	0.00115624	retrotransposon,_putative,_centromere-specific,_expressed
LOC_Os07g31330	7-18552124	0.00115984	expressed_protein
LOC_Os08g13540	8-8052008	0.00116096	retrotransposon_protein,_putative,_Ty3-gypsy_subclass,_expressed
LOC_Os08g25270	8-15352379	0.00116211	expressed_protein
LOC_Os05g07700	5-4143205	0.00116651	ribosomal_protein,_putative,_expressed
LOC_Os07g44210	7-26423869	0.00116801	SNF2_family_N-terminal_domain_containing_protein,_expressed
LOC_Os11g18700	11-10590098	0.00116828	retrotransposon_protein,_putative,_unclassified,_expressed
LOC_Os09g27780	9-16902174	0.00117429	retrotransposon_protein,_putative,_unclassified,_expressed
LOC_Os06g09110	6-4583489	0.00117642	expressed_protein
LOC_Os10g28520	10-14840102	0.0011775	CAF1_family_ribonuclease_containing_protein,_expressed
LOC_Os08g21654	8-12902378	0.00117855	retrotransposon_protein,_putative,_Ty3-gypsy_subclass,_expressed
LOC_Os08g18000	8-11037761	0.00117913	OsFBX283_-_F-box_domain_containing_protein,_expressed
LOC_Os07g28170	7-16448703	0.00118112	expressed_protein
LOC_Os08g17600	8-10761953	0.00119322	SNARE_domain_containing_protein,_putative,_expressed
LOC_Os01g38140	1-21365221	0.00119499	retrotransposon_protein,_putative,_unclassified,_expressed
LOC_Os04g02920	4-1164806	0.00120154	leucine-rich_repeat_family_protein,_putative,_expressed
LOC_Os01g07720	1-3705435	0.00120483	dolichyl-P-Man_Man-PP-dolichyl_mannosyltransferase,_putative,_expressed
LOC_Os08g20620	8-12384756	0.00121178	expressed_protein
LOC_Os08g21554	8-12838799	0.00121178	expressed_protein
LOC_Os08g21820	8-13059598	0.00121178	retrotransposon,_putative,_centromere-specific
LOC_Os08g22864	8-13742808	0.00121178	sec8_exocyst_complex_component_specific_domain_containing_protein,_expressed
LOC_Os10g28890	10-15054720	0.00121839	retrotransposon_protein,_putative,_unclassified,_expressed
LOC_Os02g17900	2-10365299	0.00122077	glycosyl_hydrolases_family_16,_putative,_expressed
LOC_Os08g23870	8-14450974	0.00122188	late_embryogenesis_abundant_group_1,_putative,_expressed
LOC_Os08g23290	8-14058099	0.00122211	serine/threonine-protein_kinase_BRI1-like_2_precursor,_putative,_expressed
LOC_Os08g16240	8-9904479	0.00122295	retrotransposon_protein,_putative,_Ty3-gypsy_subclass,_expressed
LOC_Os08g25300	8-15382458	0.00122571	expressed_protein
LOC_Os11g28970	11-16762643	0.00123448	retrotransposon_protein,_putative,_unclassified
LOC_Os12g32280	12-19489547	0.00123569	SWIB/MDM2_domain_containing_protein,_expressed
LOC_Os01g31380	1-17166602	0.0012457	retrotransposon,_putative,_centromere-specific
LOC_Os08g16910	8-10356032	0.00124924	dehydrogenase,_putative,_expressed
LOC_Os03g07500	3-3810466	0.00126172	hypothetical_protein
LOC_Os05g01440	5-252422	0.00126209	phosphoribosylformylglycinamidine_synthase,_putative,_expressed
LOC_Os07g29220	7-17119416	0.00126254	Cyclopropane-fatty-acyl-phospholipid_synthase,_putative,_expressed
LOC_Os01g72900	1-42281367	0.00126381	abscisic_stress-ripening,_putative,_expressed
LOC_Os11g28950	11-16751743	0.00127572	pollen_signalling_protein_with_adenylyl_cyclase_activity,_putative,_expressed
LOC_Os06g11500	6-6086323	0.00127874	MCM9_-_Putative_minichromosome_maintenance_MCM_family_subunit_9,_expressed
LOC_Os06g03320	6-1268775	0.00128308	retrotransposon_protein,_putative,_unclassified,_expressed
LOC_Os09g18080	9-11082737	0.00128542	retrotransposon_protein,_putative,_Ty1-copia_subclass,_expressed
LOC_Os07g46860	7-28014647	0.00128722	sex_determination_protein_tasselseed-2,_putative,_expressed
LOC_Os06g30530	6-17670282	0.00129524	expressed_protein
LOC_Os12g06360	12-3049333	0.00130864	retrotransposon_protein,_putative,_unclassified,_expressed
LOC_Os09g06380	9-3002883	0.00130898	retrotransposon,_putative,_centromere-specific
LOC_Os06g36640	6-21525539	0.00131333	transposon_protein,_putative,_CACTA,_En/Spm_sub-class,_expressed
LOC_Os06g39320	6-23329045	0.00131812	retrotransposon_protein,_putative,_unclassified
LOC_Os06g48530	6-29364200	0.00131961	ZOS6-09_-_C2H2_zinc_finger_protein,_expressed
LOC_Os08g15149	8-9167187	0.0013236	oxidoreductase,_2OG-Fe_oxygenase_family_protein,_expressed
LOC_Os12g17550	12-10064376	0.00132673	expressed_protein
LOC_Os01g21590	1-12092085	0.00133314	homeodomain,_putative,_expressed
LOC_Os06g23130	6-13490822	0.00134336	retrotransposon_protein,_putative,_unclassified,_expressed
LOC_Os01g51090	1-29351387	0.00134344	retrotransposon_protein,_putative,_unclassified,_expressed
LOC_Os10g34000	10-18141992	0.00134583	aquaporin_protein,_putative,_expressed
LOC_Os10g21150	10-10771109	0.00135128	expressed_protein
LOC_Os10g03700	10-1670388	0.00136491	transposon_protein,_putative,_CACTA,_En/Spm_sub-class,_expressed
LOC_Os11g18194	11-10264277	0.00136532	cycloartenol_synthase,_putative,_expressed
LOC_Os01g59690	1-34532798	0.00136565	OsFBX28_-_F-box_domain_containing_protein,_expressed
LOC_Os06g11110	6-5822151	0.00137623	transposon_protein,_putative,_unclassified,_expressed
LOC_Os06g11580	6-6142505	0.0013842	expressed_protein
LOC_Os09g07680	9-3874185	0.00138834	retrotransposon_protein,_putative,_Ty3-gypsy_subclass,_expressed
LOC_Os01g65810	1-38220362	0.0014003	expressed_protein
LOC_Os08g21380	8-12755045	0.00140465	retrotransposon_protein,_putative,_unclassified,_expressed
LOC_Os06g30560	6-17683336	0.0014064	transposon_protein,_putative,_CACTA,_En/Spm_sub-class,_expressed
LOC_Os01g51980	1-29875533	0.00140991	alliin_lyase_precursor,_putative,_expressed
LOC_Os01g47110	1-26916237	0.00141326	expressed_protein
LOC_Os01g13530	1-7557283	0.00141331	ABIL2,_putative,_expressed
LOC_Os08g17960	8-11018278	0.0014185	hypothetical_protein
LOC_Os08g20100	8-12048976	0.00142224	retrotransposon_protein,_putative,_Ty3-gypsy_subclass,_expressed
LOC_Os01g49900	1-28657913	0.00143598	peptidyl-tRNA_hydrolase,_mitochondrial_precursor_protein,_putative,_expressed
LOC_Os01g49930	1-28675759	0.00143598	expressed_protein
LOC_Os06g11490	6-6086803	0.00144022	plastocyanin-like_domain_containing_protein,_putative,_expressed
LOC_Os08g19270	8-11528920	0.00145926	expressed_protein
LOC_Os09g15010	9-9037582	0.00146413	retrotransposon_protein,_putative,_unclassified,_expressed
LOC_Os08g19160	8-11461372	0.00146978	transmembrane_9_superfamily_member,_putative,_expressed
LOC_Os08g16300	8-9953670	0.00147875	expressed_protein
LOC_Os06g35170	6-20501880	0.00148172	expressed_protein
LOC_Os05g51770	5-29704655	0.00148515	retrotransposon_protein,_putative,_Ty3-gypsy_subclass,_expressed
LOC_Os06g01680	6-403876	0.00148583	expressed_protein
LOC_Os06g03810	6-1526823	0.00148679	expressed_protein
LOC_Os01g12840	1-7104346	0.00148749	expressed_protein
LOC_Os06g36560	6-21479123	0.0014892	inositol_oxygenase,_putative,_expressed
LOC_Os08g17580	8-10753791	0.00149675	hypothetical_protein
LOC_Os08g16490	8-10109074	0.00150662	retrotransposon_protein,_putative,_unclassified,_expressed
LOC_Os05g48560	5-27826032	0.00150706	expressed_protein
LOC_Os02g16900	2-9634119	0.00151028	retrotransposon_protein,_putative,_Ty3-gypsy_subclass,_expressed
LOC_Os09g07740	9-3912169	0.00151119	retrotransposon_protein,_putative,_Ty1-copia_subclass,_expressed
LOC_Os01g32020	1-17533188	0.00151145	retrotransposon,_putative,_centromere-specific,_expressed
LOC_Os07g30790	7-18228298	0.00151451	ubiquinol-cytochrome_C_chaperone_family_protein,_putative,_expressed
LOC_Os01g12080	1-6572236	0.00151567	plant-specific_domain_TIGR01589_family_protein,_putative,_expressed
LOC_Os05g47970	5-27505589	0.0015267	microtubule_associated_protein,_putative,_expressed
LOC_Os05g47980	5-27511414	0.0015267	ATP_synthase,_putative,_expressed
LOC_Os08g19150	8-11458754	0.00152741	expressed_protein
LOC_Os06g03750	6-1479319	0.0015316	dehydration_response_related_protein,_putative,_expressed
LOC_Os06g38310	6-22673997	0.00155481	expressed_protein
LOC_Os12g19810	12-11553670	0.00155985	retrotransposon_protein,_putative,_unclassified,_expressed
LOC_Os08g17750	8-10862400	0.00156317	retrotransposon_protein,_putative,_Ty1-copia_subclass,_expressed
LOC_Os06g11520	6-6102131	0.00156399	LMBR1_integral_membrane_protein,_putative,_expressed
LOC_Os01g72950	1-42313362	0.00157249	expressed_protein
LOC_Os10g25130	10-12973281	0.00157343	aminotransferase,_classes_I_and_II,_domain_containing_protein,_expressed
LOC_Os05g31254	5-18170441	0.00158189	acetyltransferase,_GNAT_family,_putative,_expressed
LOC_Os05g32050	5-18675308	0.00158416	retrotransposon_protein,_putative,_Ty3-gypsy_subclass,_expressed
LOC_Os10g26370	10-13688548	0.00158581	transposon_protein,_putative,_CACTA,_En/Spm_sub-class,_expressed
LOC_Os08g19200	8-11477215	0.00158686	expressed_protein
LOC_Os03g01110	3-80559	0.00158704	RNA_methyltransferase,_TrmH_family_protein,_putative,_expressed
LOC_Os07g31680	7-18813525	0.00159493	OsFBL38_-_F-box_domain_and_LRR_containing_protein,_expressed
LOC_Os08g16590	8-10148074	0.00159776	hypothetical_protein
LOC_Os06g22560	6-13119725	0.00160538	formyl_transferase,_putative,_expressed
LOC_Os02g04290	2-1892234	0.0016105	retrotransposon_protein,_putative,_unclassified,_expressed
LOC_Os05g22550	5-12806001	0.00161223	retrotransposon_protein,_putative,_Ty3-gypsy_subclass,_expressed
LOC_Os08g16600	8-10153286	0.00161232	WD-40_repeat_protein_family,_putative,_expressed
LOC_Os02g49400	2-30185920	0.00161272	transposon_protein,_putative,_CACTA,_En/Spm_sub-class,_expressed
LOC_Os05g01150	5-132279	0.00161323	transposon_protein,_putative,_CACTA,_En/Spm_sub-class,_expressed
LOC_Os08g22400	8-13519954	0.0016196	retrotransposon_protein,_putative,_unclassified
LOC_Os11g20610	11-11949612	0.00162039	retrotransposon_protein,_putative,_Ty3-gypsy_subclass,_expressed
LOC_Os01g49480	1-28464108	0.00162193	hypothetical_protein
LOC_Os08g19170	8-11464409	0.00162955	G-patch_domain_containing_protein,_expressed
LOC_Os07g31620	7-18773467	0.00165124	transposon_protein,_putative,_Pong_sub-class,_expressed
LOC_Os01g71770	1-41574415	0.00165565	RNA_recognition_motif_containing_protein,_putative,_expressed
LOC_Os08g19210	8-11487478	0.00165798	expressed_protein
LOC_Os08g17370	8-10622825	0.00166563	transmembrane_9_superfamily_member,_putative,_expressed
LOC_Os09g03800	9-1925814	0.00166962	expressed_protein
LOC_Os09g22010	9-13331921	0.00167347	retrotransposon_protein,_putative,_Ty3-gypsy_subclass,_expressed
LOC_Os08g17490	8-10711286	0.00167934	retrotransposon_protein,_putative,_Ty3-gypsy_subclass,_expressed
LOC_Os05g10680	5-5856776	0.00168361	expressed_protein
LOC_Os07g24210	7-13770368	0.00168699	hypothetical_protein
LOC_Os03g52040	3-29860857	0.00169091	OsSCP19_-_Putative_Serine_Carboxypeptidase_homologue,_expressed
LOC_Os08g21480	8-12803753	0.00169475	retrotransposon_protein,_putative,_Ty3-gypsy_subclass
LOC_Os12g38380	12-23552714	0.00169582	tetratricopeptide_repeat_containing_protein,_putative,_expressed
LOC_Os01g20990	1-11720573	0.00169611	retrotransposon_protein,_putative,_unclassified,_expressed
LOC_Os08g23930	8-14476447	0.00170012	ENT_domain_containing_protein,_expressed
LOC_Os10g24760	10-12733695	0.00170402	retrotransposon_protein,_putative,_Ty3-gypsy_subclass,_expressed
LOC_Os08g02360	8-939008	0.00170856	exosome_complex_exonuclease,_putative,_expressed
LOC_Os08g21541	8-12830886	0.00171028	expressed_protein
LOC_Os04g42090	4-24916770	0.00171048	CPuORF7_-_conserved_peptide_uORF-containing_transcript,_expressed
LOC_Os04g42095	4-24916770	0.00171048	S-adenosyl-l-methionine_decarboxylase_leader_peptide,_putative,_expressed
LOC_Os03g45619	3-25754504	0.00171217	cytochrome_P450,_putative,_expressed
LOC_Os01g60640	1-35063014	0.00171271	WRKY21,_expressed
LOC_Os10g33950	10-18063367	0.00171324	retrotransposon_protein,_putative,_unclassified,_expressed
LOC_Os06g04070	6-1674102	0.00172551	pyridoxal-dependent_decarboxylase_protein,_putative,_expressed
LOC_Os03g38284	3-21248701	0.001728	retrotransposon_protein,_putative,_unclassified,_expressed
LOC_Os10g40200	10-21523158	0.00173155	aminotransferase_domain_containing_protein,_putative,_expressed
LOC_Os06g23260	6-13582019	0.00173928	transposon_protein,_putative,_CACTA,_En/Spm_sub-class,_expressed
LOC_Os08g12540	8-7422527	0.00174265	retrotransposon_protein,_putative,_Ty3-gypsy_subclass
LOC_Os05g24720	5-14330452	0.00175631	retrotransposon_protein,_putative,_unclassified,_expressed
LOC_Os05g20230	5-11850426	0.00175643	retrotransposon_protein,_putative,_Ty3-gypsy_subclass,_expressed
LOC_Os12g25840	12-14988536	0.00176002	mucin,_putative
LOC_Os01g13630	1-7642622	0.00176201	retrotransposon_protein,_putative,_unclassified,_expressed
LOC_Os08g15290	8-9299692	0.00176603	retrotransposon_protein,_putative,_unclassified,_expressed
LOC_Os08g22920	8-13779932	0.00176953	retrotransposon,_putative,_centromere-specific
LOC_Os08g17610	8-10768668	0.00177179	expressed_protein
LOC_Os08g19670	8-11774689	0.00178293	expressed_protein
LOC_Os01g49670	1-28542078	0.00178424	cytidylyltransferase_domain_containing_protein,_expressed
LOC_Os12g38400	12-23556159	0.0017911	MYB_family_transcription_factor,_putative,_expressed
LOC_Os06g27460	6-15546741	0.00179477	retrotransposon_protein,_putative,_unclassified,_expressed
LOC_Os01g49450	1-28441748	0.00179682	retrotransposon_protein,_putative,_unclassified
LOC_Os08g21700	8-13001541	0.00179801	DCL,_chloroplast_precursor,_putative,_expressed
LOC_Os03g27960	3-16064247	0.00180513	sodium/calcium_exchanger_protein,_putative,_expressed
LOC_Os09g03400	9-1676932	0.00180568	retrotransposon_protein,_putative,_unclassified,_expressed
LOC_Os12g03040	12-1139626	0.00181186	no_apical_meristem_protein,_putative,_expressed
LOC_Os06g23940	6-13982531	0.00181686	transposon_protein,_putative,_CACTA,_En/Spm_sub-class,_expressed
LOC_Os11g22910	11-13171211	0.00181854	retrotransposon_protein,_putative,_Ty3-gypsy_subclass,_expressed
LOC_Os02g36590	2-22098136	0.001822	CPuORF19_-_conserved_peptide_uORF-containing_transcript,_expressed
LOC_Os03g48674	3-27747413	0.00182289	retrotransposon_protein,_putative,_unclassified,_expressed
LOC_Os12g26620	12-15589578	0.00182471	transposon_protein,_putative,_CACTA,_En/Spm_sub-class,_expressed
LOC_Os12g30540	12-18337239	0.00183111	ubiquitin_carboxyl-terminal_hydrolase,_putative,_expressed
LOC_Os06g11440	6-6037279	0.00183278	transposon_protein,_putative,_Mutator_sub-class,_expressed
LOC_Os05g17370	5-9965143	0.00183605	retrotransposon_protein,_putative,_Ty3-gypsy_subclass,_expressed
LOC_Os12g22470	12-12682113	0.00183631	retrotransposon_protein,_putative,_Ty3-gypsy_subclass,_expressed
LOC_Os06g44790	6-27061541	0.00183838	expressed_protein
LOC_Os11g18790	11-10666588	0.0018414	retrotransposon_protein,_putative,_unclassified,_expressed
LOC_Os10g24780	10-12739575	0.00184727	retrotransposon_protein,_putative,_Ty3-gypsy_subclass
LOC_Os01g29409	1-16488273	0.00184828	tRNA_methyltransferase,_putative,_expressed
LOC_Os06g37470	6-22167794	0.00185142	retrotransposon_protein,_putative,_unclassified,_expressed
LOC_Os01g12820	1-7095464	0.00185725	harpin-induced_protein,_putative,_expressed
LOC_Os12g22284	12-12579472	0.00185982	white-brown_complex_homolog_protein_11,_putative,_expressed
LOC_Os08g24760	8-14982542	0.00186244	ATP-dependent_RNA_helicase,_putative,_expressed
LOC_Os02g02210	2-692678	0.00186384	aminotransferase,_putative,_expressed
LOC_Os06g11640	6-6172891	0.00186532	serine/threonine-protein_phosphatase_2A_activator_2,_putative,_expressed
LOC_Os06g23240	6-13569514	0.00188525	retrotransposon_protein,_putative,_Ty1-copia_subclass,_expressed
LOC_Os08g24060	8-14545509	0.00188936	retrotransposon_protein,_putative,_unclassified
LOC_Os02g15190	2-8472731	0.00189264	retrotransposon_protein,_putative,_unclassified,_expressed
LOC_Os07g17840	7-10548147	0.00189579	transposon_protein,_putative,_unclassified,_expressed
LOC_Os07g48410	7-28932245	0.00189976	RNA-binding_zinc_finger_protein,_putative,_expressed
LOC_Os05g15100	5-8571889	0.00190733	expressed_protein
LOC_Os04g01790	4-502704	0.00191093	retrotransposon_protein,_putative,_Ty3-gypsy_subclass,_expressed
LOC_Os12g42330	12-26321805	0.00191125	sublingual_apomucin,_putative,_expressed
LOC_Os04g01120	4-76898	0.00192541	retrotransposon_protein,_putative,_Ty3-gypsy_subclass,_expressed
LOC_Os05g20470	5-12012209	0.00192646	expressed_protein
LOC_Os01g46880	1-26745251	0.00192743	retrotransposon_protein,_putative,_unclassified,_expressed
LOC_Os03g40710	3-22639635	0.00192891	ZOS3-13_-_C2H2_zinc_finger_protein,_expressed
LOC_Os01g49880	1-28651098	0.00193849	expressed_protein
LOC_Os04g16570	4-9010107	0.00194918	retrotransposon_protein,_putative,_Ty3-gypsy_subclass,_expressed
LOC_Os04g50172	4-29934424	0.00194925	retrotransposon_protein,_putative,_unclassified,_expressed
LOC_Os05g15360	5-8696338	0.00195045	expressed_protein
LOC_Os11g32970	11-19487428	0.00195089	transposon_protein,_putative,_unclassified,_expressed
LOC_Os08g20680	8-12430024	0.00195354	expressed_protein
LOC_Os08g19114	8-11405290	0.00196041	expressed_protein
LOC_Os06g11590	6-6144810	0.00197234	expressed_protein
LOC_Os04g02180	4-736665	0.00197372	retrotransposon,_putative,_centromere-specific,_expressed
LOC_Os08g44600	8-28049462	0.00197563	retrotransposon_protein,_putative,_unclassified
LOC_Os10g33330	10-17520461	0.00197576	expressed_protein
LOC_Os01g49490	1-28468467	0.00197611	expressed_protein
LOC_Os08g23330	8-14085812	0.00197735	transposon_protein,_putative,_CACTA,_En/Spm_sub-class,_expressed
LOC_Os08g23430	8-14170759	0.00197735	starch_binding_domain_containing_protein,_putative,_expressed
LOC_Os07g31560	7-18740511	0.00198617	expressed_protein
LOC_Os06g01770	6-445174	0.00198753	expressed_protein
LOC_Os01g10410	1-5486411	0.00198803	transposon_protein,_putative,_unclassified
LOC_Os06g23070	6-13449494	0.00198931	retrotransposon_protein,_putative,_Ty3-gypsy_subclass,_expressed
LOC_Os05g15370	5-8702089	0.00199844	ribosomal_protein_L13,_putative,_expressed
LOC_Os07g25680	7-14730999	0.00200883	protein_kinase_domain_containing_protein,_expressed
LOC_Os05g43480	5-25274482	0.00200905	ubiquitin_carboxyl-terminal_hydrolase_domain_containing_protein,_expressed
LOC_Os04g08500	4-4591439	0.0020122	conserved_hypothetical_protein
LOC_Os08g32440	8-20089277	0.00201386	transposon_protein,_putative,_unclassified,_expressed
LOC_Os02g24280	2-14082230	0.00201641	transposon_protein,_putative,_unclassified,_expressed
LOC_Os06g34310	6-19957386	0.00202405	retrotransposon_protein,_putative,_unclassified
LOC_Os02g56560	2-34648770	0.002036	CK1_CaseinKinase_1.6_-_CK1_includes_the_casein_kinase_1_kinases,_expressed
LOC_Os03g30110	3-17185202	0.00203735	retrotransposon_protein,_putative,_Ty3-gypsy_subclass,_expressed
LOC_Os11g40570	11-24211168	0.00204149	plant_viral_response_family_protein,_putative,_expressed
LOC_Os12g03290	12-1271499	0.00204631	AP2_domain_containing_protein,_expressed
LOC_Os02g47340	2-28905370	0.00204686	retrotransposon_protein,_putative,_unclassified,_expressed
LOC_Os07g36560	7-21855533	0.00205196	transferase_family_protein,_putative,_expressed
LOC_Os07g46780	7-27950918	0.00205239	tyrosine-specific_transport_protein,_putative,_expressed
LOC_Os05g17570	5-10091753	0.00205964	retrotransposon_protein,_putative,_Ty3-gypsy_subclass,_expressed
LOC_Os12g41460	12-25690637	0.0020616	expressed_protein
LOC_Os07g15410	7-8905660	0.0020629	expressed_protein
LOC_Os06g37790	6-22367669	0.00206702	expressed_protein
LOC_Os03g12600	3-6694928	0.00207082	retrotransposon_protein,_putative,_unclassified,_expressed
LOC_Os01g49840	1-28622527	0.00207219	hypothetical_protein
LOC_Os11g40550	11-24193967	0.00207465	receptor_kinase,_putative,_expressed
LOC_Os09g11930	9-6710022	0.00209206	expressed_protein
LOC_Os04g45834	4-27141595	0.002093	DUF584_domain_containing_protein,_putative,_expressed
LOC_Os06g03380	6-1290594	0.00209487	expressed_protein
LOC_Os01g24060	1-13562513	0.0021001	importin_subunit_alpha,_putative,_expressed
LOC_Os07g47310	7-28283678	0.00210021	expressed_protein
LOC_Os05g15480	5-8755116	0.00210102	retrotransposon_protein,_putative,_unclassified,_expressed
LOC_Os09g03110	9-1479478	0.002107	retrotransposon_protein,_putative,_Ty3-gypsy_subclass,_expressed
LOC_Os01g11860	1-6412827	0.00210784	DJ-1_family_protein,_putative,_expressed
LOC_Os03g13920	3-7552921	0.00210825	transposon_protein,_putative,_CACTA,_En/Spm_sub-class,_expressed
LOC_Os06g04040	6-1653652	0.0021138	WD_domain,_G-beta_repeat_domain_containing_protein,_expressed
LOC_Os08g17770	8-10893855	0.00211688	expressed_protein
LOC_Os06g06890	6-3270627	0.00211896	expressed_protein
LOC_Os01g12170	1-6636299	0.00212168	retrotransposon_protein,_putative,_unclassified,_expressed
LOC_Os01g28040	1-15683917	0.00213333	transposon_protein,_putative,_unclassified,_expressed
LOC_Os06g36600	6-21507659	0.00213786	retrotransposon_protein,_putative,_unclassified
LOC_Os05g32544	5-19030241	0.00214239	glycosyltransferase,_putative,_expressed
LOC_Os02g27010	2-15880580	0.00214386	retrotransposon_protein,_putative,_unclassified,_expressed
LOC_Os02g53835	2-32975048	0.00215795	expressed_protein
LOC_Os08g19750	8-11821159	0.00216244	retrotransposon_protein,_putative,_Ty3-gypsy_subclass,_expressed
LOC_Os11g32980	11-19490121	0.00216605	transposon_protein,_putative,_unclassified,_expressed
LOC_Os04g13820	4-7708688	0.00217028	retrotransposon_protein,_putative,_Ty3-gypsy_subclass,_expressed
LOC_Os06g04090	6-1699665	0.0021707	no_apical_meristem_protein,_putative,_expressed
LOC_Os08g08880	8-5167499	0.00217593	hypothetical_protein
LOC_Os11g40600	11-24226366	0.00217691	expressed_protein
LOC_Os06g23370	6-13636714	0.0021778	expressed_protein
LOC_Os10g34230	10-18272122	0.0021838	cytokinin_dehydrogenase_precursor,_putative,_expressed
LOC_Os03g46730	3-26442954	0.00219219	expressed_protein
LOC_Os02g56540	2-34632949	0.00219936	kinesin_motor_domain_containing_protein,_putative,_expressed
LOC_Os08g19320	8-11558950	0.00220186	aberrant_root_formation_protein_4,_putative,_expressed
LOC_Os09g33750	9-19937094	0.00220261	retrotransposon_protein,_putative,_Ty1-copia_subclass,_expressed
LOC_Os01g11830	1-6396576	0.00221149	oryzain_alpha_chain_precursor,_putative,_expressed
LOC_Os12g04200	12-1767043	0.00221277	GRAS_family_transcription_factor_containing_protein,_expressed
LOC_Os07g29670	7-17441979	0.00221349	retrotransposon_protein,_putative,_unclassified
LOC_Os04g53040	4-31595745	0.00221732	retrotransposon_protein,_putative,_unclassified,_expressed
LOC_Os08g21770	8-13038322	0.00222096	retrotransposon,_putative,_centromere-specific,_expressed
LOC_Os08g16500	8-10109939	0.00222344	retrotransposon_protein,_putative,_unclassified,_expressed
LOC_Os01g58960	1-34085211	0.00222357	cytochrome_P450,_putative,_expressed
LOC_Os09g21130	9-12755174	0.00222974	expressed_protein
LOC_Os04g19760	4-11039130	0.00223286	retrotransposon_protein,_putative,_unclassified,_expressed
LOC_Os05g15040	5-8531964	0.00223511	NB-ARC_domain_containing_protein,_expressed
LOC_Os08g23940	8-14483606	0.00224217	expressed_protein
LOC_Os07g29430	7-17275365	0.00224668	expressed_protein
LOC_Os05g01710	5-437046	0.00225066	transcription_initiation_factor_IIA_gamma_chain,_putative,_expressed
LOC_Os03g16540	3-9122069	0.00225253	transposon_protein,_putative,_unclassified,_expressed
LOC_Os08g23950	8-14487981	0.00225523	expressed_protein
LOC_Os06g04000	6-1635470	0.00226031	peptidyl-prolyl_cis-trans_isomerase,_putative,_expressed
LOC_Os06g44750	6-27027126	0.00226431	AP2_domain_containing_protein,_expressed
LOC_Os08g19260	8-11521461	0.00226688	expressed_protein
LOC_Os06g04150	6-1734070	0.00226703	magnesium-protoporphyrin_O-methyltransferase,_putative,_expressed
LOC_Os06g04169	6-1738200	0.00226703	hydrolase,_alpha/beta_fold_family_domain_containing_protein,_expressed
LOC_Os01g13700	1-7671486	0.00226759	DNA-binding_protein-related,_putative,_expressed
LOC_Os01g11940	1-6495360	0.00227481	osFTL1__FT-Like1_homologous_to_Flowering_Locus_T__gene;_contains_Pfam_profile_PF01161:_Phosphatidylethanolamine-binding_protein,_expressed
LOC_Os01g11980	1-6526738	0.00227481	SFT2,_putative,_expressed
LOC_Os01g29488	1-16529718	0.00227601	retrotransposon_protein,_putative,_unclassified,_expressed
LOC_Os02g40090	2-24270546	0.00227613	transporter-related,_putative,_expressed
LOC_Os11g18780	11-10659326	0.00227908	retrotransposon_protein,_putative,_unclassified,_expressed
LOC_Os10g12480	10-6938045	0.00228434	transposon_protein,_putative,_CACTA,_En/Spm_sub-class,_expressed
LOC_Os03g42350	3-23556468	0.00229368	ankyrin,_putative,_expressed
LOC_Os08g15440	8-9392003	0.00229913	hypothetical_protein
LOC_Os11g03300	11-1234399	0.00230533	NAC_domain_transcription_factor,_putative,_expressed
LOC_Os05g37940	5-22250215	0.00230662	transposon_protein,_putative,_unclassified,_expressed
LOC_Os11g15070	11-8483137	0.00231189	retrotransposon_protein,_putative,_Ty3-gypsy_subclass,_expressed
LOC_Os05g15410	5-8717346	0.0023139	retrotransposon_protein,_putative,_Ty3-gypsy_subclass
LOC_Os04g11080	4-6029349	0.00231518	retrotransposon_protein,_putative,_unclassified,_expressed
LOC_Os06g44070	6-26583068	0.00231774	retrotransposon_protein,_putative,_unclassified,_expressed
LOC_Os03g46800	3-26472137	0.00231916	retrotransposon_protein,_putative,_Ty1-copia_subclass,_expressed
LOC_Os12g03400	12-1317653	0.00232398	expressed_protein
LOC_Os04g11040	4-5989587	0.00232625	expressed_protein
LOC_Os01g49650	1-28539176	0.00232746	LTPL150_-_Protease_inhibitor/seed_storage/LTP_family_protein_precursor,_expressed
LOC_Os06g39120	6-23233406	0.0023306	expressed_protein
LOC_Os02g32300	2-19076183	0.00233605	retrotransposon_protein,_putative,_unclassified,_expressed
LOC_Os08g31150	8-19250701	0.00234655	retrotransposon_protein,_putative,_unclassified,_expressed
LOC_Os08g24980	8-15145006	0.00235028	transposon_protein,_putative,_unclassified,_expressed
LOC_Os10g34110	10-18206000	0.00235142	expressed_protein
LOC_Os02g52690	2-32229366	0.00235234	retrotransposon_protein,_putative,_Ty3-gypsy_subclass,_expressed
LOC_Os03g32690	3-18731927	0.0023525	retrotransposon_protein,_putative,_unclassified,_expressed
LOC_Os04g21610	4-12227762	0.00235536	expressed_protein
LOC_Os01g10480	1-5543746	0.00235801	plastocyanin-like_domain_containing_protein,_putative,_expressed
LOC_Os07g15070	7-8633205	0.0023681	retrotransposon,_putative,_centromere-specific
LOC_Os01g11054	1-5903458	0.00237182	phosphoenolpyruvate_carboxylase,_putative,_expressed
LOC_Os11g40610	11-24230644	0.00237366	EARLY_flowering_protein,_putative,_expressed
LOC_Os03g44370	3-24942639	0.00237771	transposon_protein,_putative,_CACTA,_En/Spm_sub-class,_expressed
LOC_Os02g22390	2-13377184	0.00237842	retrotransposon_protein,_putative,_unclassified,_expressed
LOC_Os08g19290	8-11538386	0.00237905	hypothetical_protein
LOC_Os07g26700	7-15421911	0.00238803	UPF0041_domain_containing_protein,_putative,_expressed
LOC_Os05g34630	5-20538032	0.00239026	hydrolase,_alpha/beta_fold_family_domain_containing_protein,_expressed
LOC_Os09g28960	9-17617427	0.00239163	retrotransposon_protein,_putative,_unclassified
LOC_Os06g24950	6-14621332	0.00239236	retrotransposon_protein,_putative,_Ty3-gypsy_subclass
LOC_Os04g09530	4-5112378	0.00239915	pentatricopeptide,_putative,_expressed
LOC_Os01g13690	1-7665288	0.00240449	ligA,_putative,_expressed
LOC_Os01g13720	1-7678161	0.00240449	expressed_protein
LOC_Os01g13730	1-7679329	0.00240449	WD_domain,_G-beta_repeat_domain_containing_protein,_expressed
LOC_Os01g13740	1-7687169	0.00240449	myb-like_DNA-binding_domain_containing_protein,_expressed
LOC_Os01g31080	1-16991983	0.00241026	retrotransposon_protein,_putative,_unclassified,_expressed
LOC_Os01g09750	1-5024474	0.00241625	RNA_methyltransferase_protein,_putative,_expressed
LOC_Os02g16510	2-9424692	0.00242361	retrotransposon_protein,_putative,_Ty1-copia_subclass,_expressed
LOC_Os12g22390	12-12642640	0.00242664	retrotransposon_protein,_putative,_Ty3-gypsy_subclass
LOC_Os10g34120	10-18208366	0.00243543	retrotransposon_protein,_putative,_Ty1-copia_subclass,_expressed
LOC_Os10g33774	10-17874257	0.00244066	leucoanthocyanidin_reductase,_putative,_expressed
LOC_Os10g35990	10-19237817	0.0024439	DEAD-box_ATP-dependent_RNA_helicase,_putative,_expressed
LOC_Os01g23550	1-13225037	0.00245058	retrotransposon_protein,_putative,_unclassified,_expressed
LOC_Os08g15430	8-9389320	0.00245347	expressed_protein
LOC_Os10g13630	10-7388669	0.0024578	expressed_protein
LOC_Os10g11680	10-6454395	0.00246315	retrotransposon_protein,_putative,_unclassified,_expressed
LOC_Os10g11650	10-6425788	0.0024646	transposon_protein,_putative,_CACTA,_En/Spm_sub-class,_expressed
LOC_Os06g03780	6-1506452	0.00246549	NUC153_domain_containing_protein,_expressed
LOC_Os11g41110	11-24629027	0.00246757	transposon_protein,_putative,_Ac/Ds_sub-class,_expressed
LOC_Os11g36280	11-21360073	0.00247846	transposon_protein,_putative,_CACTA,_En/Spm_sub-class,_expressed
LOC_Os05g01090	5-92935	0.00247987	pex14,_putative,_expressed
LOC_Os05g01110	5-98254	0.00247987	ribosomal_protein_L28_protein,_putative,_expressed
LOC_Os11g40564	11-24208559	0.00248381	expressed_protein
LOC_Os01g04409	1-1958695	0.00248761	OsWAK1_-_OsWAK_receptor-like_cytoplasmic_kinase_OsWAK-RLCK,_expressed
LOC_Os05g00998	5-25178	0.00248903	retrotransposon_protein,_putative,_unclassified
LOC_Os01g46000	1-26145800	0.00249108	retrotransposon_protein,_putative,_unclassified,_expressed
LOC_Os02g47970	2-29343097	0.00249438	calpain,_putative,_expressed
LOC_Os08g25880	8-15765272	0.00249681	retrotransposon_protein,_putative,_unclassified,_expressed
LOC_Os12g30030	12-17966295	0.00249948	IscA-like_iron-sulfur_assembly_protein,_mitochondrial_precursor,_putative,_expressed
LOC_Os01g49420	1-28423542	0.00250863	retrotransposon_protein,_putative,_unclassified,_expressed
LOC_Os06g03310	6-1260892	0.00250948	retrotransposon_protein,_putative,_unclassified,_expressed
LOC_Os03g46750	3-26448908	0.00251101	GPI_mannosyltransferase_1,_putative,_expressed
LOC_Os03g44360	3-24940836	0.00252169	retrotransposon_protein,_putative,_Ty3-gypsy_subclass,_expressed
LOC_Os11g28880	11-16719738	0.00252234	retrotransposon_protein,_putative,_Ty3-gypsy_subclass
LOC_Os06g03900	6-1572643	0.00252367	esterase_precursor,_putative,_expressed
LOC_Os01g49820	1-28606873	0.0025293	lipid_phosphatase_protein,_putative,_expressed
LOC_Os04g53640	4-31971192	0.00255196	peroxidase_precursor,_putative,_expressed
LOC_Os01g01270	1-131590	0.00255361	retrotransposon_protein,_putative,_unclassified,_expressed
LOC_Os11g06080	11-2900201	0.00255963	retrotransposon_protein,_putative,_unclassified,_expressed
LOC_Os02g48400	2-29635895	0.00256075	expressed_protein
LOC_Os06g28820	6-16402886	0.00256536	cycloartenol_synthase,_putative,_expressed
LOC_Os11g26370	11-15089447	0.00256812	retrotransposon_protein,_putative,_Ty3-gypsy_subclass,_expressed
LOC_Os07g13590	7-7794028	0.0025685	expressed_protein
LOC_Os11g24180	11-13780821	0.00257363	OsSCP50_-_Putative_Serine_Carboxypeptidase_homologue,_expressed
LOC_Os11g28184	11-16206872	0.00257621	expressed_protein
LOC_Os03g49126	3-27986855	0.00258017	expressed_protein
LOC_Os01g59760	1-34566587	0.0025837	bZIP_transcription_factor,_putative,_expressed
LOC_Os08g21790	8-13044716	0.00258607	retrotransposon_protein,_putative,_unclassified,_expressed
LOC_Os11g13820	11-7617704	0.00259093	protein_phosphatase_2C,_putative,_expressed
LOC_Os10g41100	10-22072175	0.00259324	CCT_motif_family_protein,_expressed
LOC_Os11g25230	11-14372221	0.00260495	tropinone_reductase,_putative
LOC_Os08g16559	8-10132037	0.0026064	expressed_protein
LOC_Os10g20410	10-10265259	0.00260764	transposon_protein,_putative,_CACTA,_En/Spm_sub-class,_expressed
LOC_Os02g14300	2-7854116	0.00260894	expressed_protein
LOC_Os12g32440	12-19570542	0.0026091	retrotransposon_protein,_putative,_Ty1-copia_subclass
LOC_Os05g01040	5-65177	0.00261119	serine/threonine-protein_kinase,_putative,_expressed
LOC_Os10g39489	10-21086636	0.00262146	retrotransposon_protein,_putative,_unclassified,_expressed
LOC_Os06g26100	6-15272724	0.00262483	retrotransposon_protein,_putative,_unclassified,_expressed
LOC_Os01g20050	1-11386156	0.00262834	retrotransposon_protein,_putative,_unclassified,_expressed
LOC_Os11g35510	11-20809054	0.00263071	retrotransposon_protein,_putative,_unclassified
LOC_Os08g23910	8-14469827	0.00263772	transposon_protein,_putative,_CACTA,_En/Spm_sub-class,_expressed
LOC_Os06g39230	6-23289893	0.00263813	aldehyde_dehydrogenase,_putative,_expressed
LOC_Os01g59780	1-34575706	0.00263958	AP2_domain_containing_protein,_expressed
LOC_Os10g32900	10-17222855	0.00263993	CCT_motif_family_protein,_expressed
LOC_Os08g42890	8-27119078	0.00264215	pectinesterase_inhibitor_domain_containing_protein,_expressed
LOC_Os09g32980	9-19688134	0.00264585	retrotransposon_protein,_putative,_LINE_subclass,_expressed
LOC_Os06g51190	6-30969113	0.00264937	lysine_ketoglutarate_reductase_trans-splicing_related_1,_putative,_expressed
LOC_Os06g24110	6-14107351	0.00265166	retrotransposon_protein,_putative,_unclassified,_expressed
LOC_Os03g38100	3-21155259	0.00265205	retrotransposon,_putative,_centromere-specific,_expressed
LOC_Os05g01020	5-41995	0.00265351	transcriptional_repressor,_putative,_expressed
LOC_Os05g01190	5-147108	0.00265351	transposon_protein,_putative,_unclassified,_expressed
LOC_Os07g06500	7-3156465	0.00265378	OsFBL34_-_F-box_domain_and_LRR_containing_protein,_expressed
LOC_Os06g08564	6-4264937	0.00266097	OsRCI2-8_-_Putative_low_temperature_and_salt_responsive_protein,_expressed
LOC_Os09g12350	9-7048927	0.00266877	expressed_protein
LOC_Os03g46720	3-26440824	0.00267106	OsFBX106_-_F-box_domain_containing_protein,_expressed
LOC_Os03g46860	3-26505341	0.00267106	helix-loop-helix_DNA-binding_protein,_putative,_expressed
LOC_Os07g14680	7-8365221	0.0026722	expressed_protein
LOC_Os11g03440	11-1318568	0.00267297	myb-like_DNA-binding_domain_containing_protein,_putative,_expressed
LOC_Os01g49614	1-28524438	0.00267354	Protein_kinase_domain_containing_protein,_expressed
LOC_Os07g11680	7-6460868	0.00267592	retrotransposon_protein,_putative,_unclassified,_expressed
LOC_Os11g25350	11-14447016	0.00267696	retrotransposon_protein,_putative,_unclassified
LOC_Os02g05110	2-2442194	0.00268495	transposon_protein,_putative,_unclassified
LOC_Os03g32749	3-18752683	0.00268703	retrotransposon_protein,_putative,_unclassified,_expressed
LOC_Os01g49730	1-28572692	0.0026891	expressed_protein
LOC_Os12g13490	12-7576403	0.0026998	retrotransposon_protein,_putative,_Ty3-gypsy_subclass
LOC_Os04g40890	4-24272660	0.00270018	hypothetical_protein
LOC_Os07g31250	7-18501181	0.00271018	OsWAK69_-_OsWAK_receptor-like_cytoplasmic_kinase_OsWAK-RLCK,_expressed
LOC_Os08g29490	8-18074241	0.00271471	retrotransposon_protein,_putative,_unclassified,_expressed
LOC_Os01g62340	1-36076533	0.00272394	retrotransposon_protein,_putative,_Ty3-gypsy_subclass,_expressed
LOC_Os11g04750	11-2025617	0.00273035	expressed_protein
LOC_Os09g20400	9-12264419	0.00273232	expressed_protein
LOC_Os05g18880	5-10964431	0.00273899	transposon_protein,_putative,_CACTA,_En/Spm_sub-class,_expressed
LOC_Os01g50090	1-28783195	0.00274234	retrotransposon_protein,_putative,_unclassified,_expressed
LOC_Os08g19230	8-11504539	0.00274501	expressed_protein
LOC_Os01g22930	1-12890995	0.00274505	expressed_protein
LOC_Os11g40590	11-24220695	0.00274866	DUF1399_containing_protein,_putative,_expressed
LOC_Os02g56110	2-34339356	0.0027562	AP-1_complex_subunit_gamma-1,_putative,_expressed
LOC_Os06g37860	6-22416646	0.00276064	transposon_protein,_putative,_CACTA,_En/Spm_sub-class,_expressed
LOC_Os06g23040	6-13441336	0.00276365	expressed_protein
LOC_Os06g03580	6-1385882	0.00276399	zinc_RING_finger_protein,_putative,_expressed
LOC_Os09g06480	9-3069442	0.00276911	retrotransposon,_putative,_centromere-specific
LOC_Os01g02750	1-955991	0.00276935	protein_kinase_domain_containing_protein,_expressed
LOC_Os01g49680	1-28549702	0.00277502	DNA_repair_helicase_XPB2,_putative,_expressed
LOC_Os11g35680	11-20919301	0.00277992	retrotransposon_protein,_putative,_Ty3-gypsy_subclass,_expressed
LOC_Os11g40780	11-24387290	0.00278158	disease_resistance_protein,_putative,_expressed
LOC_Os01g59750	1-34561683	0.00278851	histidine_triad_family_protein,_putative,_expressed
LOC_Os03g30334	3-17305895	0.00279633	expressed_protein
LOC_Os10g34030	10-18151401	0.00279672	zinc_finger,_C3HC4_type_domain_containing_protein,_expressed
LOC_Os03g46690	3-26425218	0.00279837	OsFBX105_-_F-box_domain_containing_protein,_expressed
LOC_Os02g24310	2-14105937	0.0028003	transposon_protein,_putative,_CACTA,_En/Spm_sub-class,_expressed
LOC_Os06g01280	6-180451	0.00280233	retrotransposon_protein,_putative,_unclassified
LOC_Os08g22354	8-13476918	0.00280644	polyadenylate-binding_protein,_putative,_expressed
LOC_Os01g13570	1-7592705	0.00280694	phosphoglycerate_mutase,_putative,_expressed
LOC_Os12g04530	12-1927067	0.00280993	expressed_protein
LOC_Os01g31430	1-17189321	0.00281739	retrotransposon_protein,_putative,_Ty3-gypsy_subclass,_expressed
LOC_Os02g49380	2-30170620	0.0028256	retrotransposon_protein,_putative,_unclassified,_expressed
LOC_Os08g23320	8-14079487	0.00283051	para-hydroxybenzoate--polyprenyltransferase,_mitochondrial_precursor,_putative,_expressed
LOC_Os11g16900	11-9374109	0.00283556	transposon_protein,_putative,_CACTA,_En/Spm_sub-class,_expressed
LOC_Os02g25010	2-14501206	0.00284057	hypothetical_protein
LOC_Os06g03980	6-1614841	0.00284566	expressed_protein
LOC_Os12g38560	12-23675919	0.00284602	expressed_protein
LOC_Os09g07220	9-3532817	0.00285009	retrotransposon_protein,_putative,_unclassified,_expressed
LOC_Os12g40250	12-24909508	0.00285585	transposon_protein,_putative,_CACTA,_En/Spm_sub-class,_expressed
LOC_Os08g22370	8-13489013	0.00285587	retrotransposon_protein,_putative,_unclassified,_expressed
LOC_Os08g24000	8-14519340	0.00285635	retrotransposon_protein,_putative,_unclassified,_expressed
LOC_Os12g43890	12-27250563	0.00286106	GNS1/SUR4_membrane_family_protein,_putative,_expressed
LOC_Os01g50032	1-28740622	0.00287491	expressed_protein
LOC_Os09g07840	9-3979199	0.0028762	retrotransposon_protein,_putative,_unclassified,_expressed
LOC_Os01g59020	1-34115536	0.00287664	cytochrome_P450,_putative,_expressed
LOC_Os06g04080	6-1692044	0.00288414	glycosyl_hydrolases_family_17,_putative,_expressed
LOC_Os08g23100	8-13916210	0.00288559	cyclase_family_protein,_putative,_expressed
LOC_Os06g30610	6-17713726	0.00289001	transposon_protein,_putative,_CACTA,_En/Spm_sub-class,_expressed
LOC_Os05g48290	5-27685289	0.00289241	T-complex_protein,_putative,_expressed
LOC_Os08g24310	8-14676218	0.00289519	receptor-like_protein_kinase_precursor,_putative,_expressed
LOC_Os07g16120	7-9387983	0.0028999	retrotransposon_protein,_putative,_unclassified,_expressed
LOC_Os06g04900	6-2154828	0.00290548	transporter_family_protein,_putative,_expressed
LOC_Os12g02670	12-932080	0.0029133	retrotransposon_protein,_putative,_Ty1-copia_subclass,_expressed
LOC_Os09g07410	9-3682829	0.00292322	retrotransposon_protein,_putative,_unclassified,_expressed
LOC_Os04g13080	4-7215454	0.00292419	retrotransposon,_putative,_centromere-specific,_expressed
LOC_Os11g47600	11-28759155	0.00292975	glycosyl_hydrolase,_putative,_expressed
LOC_Os03g16580	3-9141151	0.00293277	expressed_protein
LOC_Os10g20990	10-10627244	0.00293348	ribosomal_protein_S12_containing_protein,_expressed
LOC_Os11g26070	11-14911034	0.00293911	transposon_protein,_putative,_CACTA,_En/Spm_sub-class
LOC_Os05g49130	5-28186534	0.00293995	16S_rRNA_processing_protein_RimM_containing_protein,_expressed
LOC_Os04g52900	4-31503429	0.00294074	ABC_transporter_family_protein,_putative,_expressed
LOC_Os05g06010	5-3008314	0.00294083	hypothetical_protein
LOC_Os06g23350	6-13631132	0.00294324	late_embryogenesis_abundant_protein_D-34,_putative,_expressed
LOC_Os10g20970	10-10619057	0.00294432	transposon_protein,_putative,_CACTA,_En/Spm_sub-class,_expressed
LOC_Os01g01880	1-482934	0.00294961	expressed_protein
LOC_Os02g40430	2-24490847	0.00295087	HEAT_repeat_family_protein,_putative,_expressed
LOC_Os07g11270	7-6213853	0.00295361	retrotransposon_protein,_putative,_Ty3-gypsy_subclass,_expressed
LOC_Os08g07180	8-4014411	0.00295766	cytokinin-O-glucosyltransferase_2,_putative,_expressed
LOC_Os08g34410	8-21604083	0.0029623	expressed_protein
LOC_Os01g55520	1-31988339	0.00296271	ATROPGEF7/ROPGEF7,_putative,_expressed
LOC_Os08g28040	8-17079462	0.00297087	retrotransposon_protein,_putative,_Ty1-copia_subclass,_expressed
LOC_Os09g34070	9-20107808	0.00297859	RNA_recognition_motif_containing_protein,_expressed
LOC_Os06g03670	6-1434870	0.00298145	dehydration-responsive_element-binding_protein,_putative,_expressed
LOC_Os01g55580	1-32019370	0.00298147	tesmin/TSO1-like_CXC_domain_containing_protein,_expressed
LOC_Os04g12020	4-6598752	0.00298713	hypothetical_protein
LOC_Os09g07540	9-3780430	0.00298938	retrotransposon_protein,_putative,_unclassified,_expressed
LOC_Os06g11730	6-6209072	0.00300297	RNA_recognition_motif_containing_protein,_putative,_expressed
LOC_Os06g36660	6-21545585	0.00300299	retrotransposon_protein,_putative,_unclassified
LOC_Os04g11620	4-6358388	0.00301792	retrotransposon_protein,_putative,_unclassified,_expressed
LOC_Os08g19250	8-11513329	0.00303319	retrotransposon_protein,_putative,_Ty1-copia_subclass,_expressed
LOC_Os07g27400	7-15961882	0.00303855	expressed_protein
LOC_Os05g15180	5-8617113	0.00304215	expressed_protein
LOC_Os01g49760	1-28578148	0.00305237	expressed_protein
LOC_Os09g06150	9-2882849	0.00305517	retrotransposon_protein,_putative,_unclassified,_expressed
LOC_Os04g10390	4-5633642	0.00306248	transposon_protein,_putative,_unclassified,_expressed
LOC_Os01g33840	1-18622577	0.00306536	heat_shock_protein_binding_protein,_putative,_expressed
LOC_Os02g33210	2-19743782	0.00306541	retrotransposon_protein,_putative,_unclassified,_expressed
LOC_Os01g31260	1-17095885	0.00306796	retrotransposon_protein,_putative,_Ty3-gypsy_subclass,_expressed
LOC_Os09g39830	9-22837484	0.00306829	retrotransposon_protein,_putative,_unclassified,_expressed
LOC_Os11g25210	11-14364664	0.0030684	retrotransposon_protein,_putative,_unclassified,_expressed
LOC_Os04g19090	4-10597963	0.00307047	retrotransposon_protein,_putative,_Ty3-gypsy_subclass,_expressed
LOC_Os08g26544	8-16159315	0.00307125	expressed_protein
LOC_Os08g20800	8-12491165	0.00307267	retrotransposon_protein,_putative,_Ty3-gypsy_subclass,_expressed
LOC_Os08g24182	8-14600128	0.0030797	expressed_protein
LOC_Os06g36590	6-21496216	0.00308247	transporter,_monovalent_cation:proton_antiporter-2_family,_putative,_expressed
LOC_Os01g09710	1-5011363	0.00308257	expressed_protein
LOC_Os04g55300	4-32872368	0.00308445	hypothetical_protein
LOC_Os08g13550	8-8053432	0.00308616	retrotransposon_protein,_putative,_Ty3-gypsy_subclass
LOC_Os03g25869	3-14793148	0.00309095	amino_acid_permease_family_protein,_putative,_expressed
LOC_Os08g32970	8-20460570	0.00311216	annexin,_putative,_expressed
LOC_Os11g35300	11-20697202	0.00312271	expressed_protein
LOC_Os10g28410	10-14778620	0.00312363	GA19388-PA,_putative,_expressed
LOC_Os02g48350	2-29600637	0.00312904	diacylglycerol_O-acyltransferase,_putative,_expressed
LOC_Os01g55560	1-32011046	0.0031315	ABIL3,_putative,_expressed
LOC_Os01g21110	1-11779249	0.00313515	expressed_protein
LOC_Os08g36130	8-22763395	0.00313553	retrotransposon_protein,_putative,_Ty3-gypsy_subclass,_expressed
LOC_Os07g23870	7-13480556	0.00313724	retrotransposon_protein,_putative,_unclassified,_expressed
LOC_Os03g33700	3-19272433	0.00314861	retrotransposon_protein,_putative,_unclassified,_expressed
LOC_Os02g43770	2-26411657	0.00314902	DUF630/DUF632_domains_containing_protein,_putative,_expressed
LOC_Os08g35910	8-22651593	0.00315098	expressed_protein
LOC_Os06g26150	6-15299882	0.00315206	retrotransposon_protein,_putative,_Ty3-gypsy_subclass,_expressed
LOC_Os04g19360	4-10772504	0.00315748	retrotransposon_protein,_putative,_Ty3-gypsy_subclass,_expressed
LOC_Os01g13710	1-7675477	0.00316595	transposon_protein,_putative,_unclassified,_expressed
LOC_Os06g03710	6-1468094	0.00316987	DELLA_protein_SLR1,_putative,_expressed
LOC_Os05g33960	5-20045245	0.00317369	peptide_transporter_PTR2,_putative,_expressed
LOC_Os11g10420	11-5663489	0.0031756	phosphatidylinositol_kinase,_putative,_expressed
LOC_Os11g28940	11-16743428	0.00318361	expressed_protein
LOC_Os10g32124	10-16878372	0.00318505	retrotransposon_protein,_putative,_unclassified,_expressed
LOC_Os03g41710	3-23173479	0.0031945	retrotransposon_protein,_putative,_Ty3-gypsy_subclass,_expressed
LOC_Os08g16070	8-9797556	0.00320113	NB-ARC_domain_containing_protein,_expressed
LOC_Os06g01690	6-412048	0.0032073	septum_site-determining_protein_minD,_putative,_expressed
LOC_Os05g21000	5-12357540	0.00320791	retrotransposon_protein,_putative,_Ty3-gypsy_subclass,_expressed
LOC_Os09g23710	9-14092891	0.00320842	expressed_protein
LOC_Os06g37840	6-22397076	0.00320974	resistance_protein,_putative,_expressed
LOC_Os05g01060	5-75660	0.00321355	expressed_protein
LOC_Os01g33869	1-18630035	0.00321544	expressed_protein
LOC_Os05g06050	5-3032654	0.00321853	N-acetylglucosaminyltransferase,_putative,_expressed
LOC_Os01g60010	1-34690206	0.00322745	PPR_repeat_domain_containing_protein,_putative,_expressed
LOC_Os06g22770	6-13258387	0.00323058	retrotransposon_protein,_putative,_Ty3-gypsy_subclass,_expressed
LOC_Os09g32550	9-19434358	0.00323457	glucan_endo-1,3-beta-glucosidase_precursor,_putative,_expressed
LOC_Os08g16690	8-10207531	0.00323727	expressed_protein
LOC_Os07g31550	7-18730997	0.00325027	powdery_mildew_resistant_protein_5,_putative,_expressed
LOC_Os06g36650	6-21538814	0.00325682	ABC_transporter_family_protein,_putative,_expressed
LOC_Os01g42920	1-24421317	0.00325821	retrotransposon_protein,_putative,_Ty1-copia_subclass,_expressed
LOC_Os07g31340	7-18556120	0.0032591	regulator_of_nonsense_transcripts_1,_putative,_expressed
LOC_Os05g48000	5-27521058	0.00326994	expressed_protein
LOC_Os11g41490	11-24888320	0.00327554	retrotransposon_protein,_putative,_Ty3-gypsy_subclass,_expressed
LOC_Os08g24790	8-15009037	0.00328214	AIR12,_putative,_expressed
LOC_Os06g38550	6-22839471	0.0032883	expressed_protein
LOC_Os08g17010	8-10423501	0.00329032	retrotransposon_protein,_putative,_unclassified,_expressed
LOC_Os08g19740	8-11816749	0.00329806	retrotransposon_protein,_putative,_Ty1-copia_subclass
LOC_Os09g13640	9-7953251	0.0032993	retrotransposon_protein,_putative,_unclassified
LOC_Os09g11890	9-6676660	0.00329974	expressed_protein
LOC_Os03g46760	3-26452193	0.00330166	hypothetical_protein
LOC_Os08g40650	8-25737475	0.00330291	senescence-induced_receptor-like_serine/threonine-protein_kinase_precursor,_putative,_expressed
LOC_Os10g34090	10-18197494	0.00330331	retrotransposon_protein,_putative,_unclassified,_expressed
LOC_Os07g44170	7-26397945	0.00330585	pentatricopeptide_repeat_domain_containing_protein,_putative,_expressed
LOC_Os06g23114	6-13476838	0.00330606	copper_methylamine_oxidase_precursor,_putative,_expressed
LOC_Os09g09320	9-4991329	0.00331607	nuclear_transport_factor,_putative,_expressed
LOC_Os06g37830	6-22388624	0.00331748	transposon_protein,_putative,_CACTA,_En/Spm_sub-class,_expressed
LOC_Os08g13970	8-8383017	0.00332159	transposon_protein,_putative,_unclassified,_expressed
LOC_Os02g29550	2-17576342	0.00333158	AP2_domain_containing_protein,_expressed
LOC_Os01g02730	1-938321	0.00333561	TAK14,_putative,_expressed
LOC_Os06g11740	6-6222724	0.00333641	OsAPRL2__adenosine_5'-phosphosulfate_reductase-like_OsAPRL2,_expressed
LOC_Os04g54670	4-32523198	0.00334306	retrotransposon_protein,_putative,_unclassified,_expressed
LOC_Os06g30810	6-17869457	0.0033451	OsMADS75_-_MADS-box_family_gene_with_M-alpha_type-box,_expressed
LOC_Os03g42280	3-23523940	0.003348	B3_DNA_binding_domain_containing_protein,_expressed
LOC_Os08g17210	8-10545026	0.00335304	transposon_protein,_putative,_CACTA,_En/Spm_sub-class
LOC_Os11g28980	11-16766732	0.00335336	GPI_transamidase_component_Gpi16_subunit_family_protein,_putative,_expressed
LOC_Os03g26610	3-15204196	0.00335387	transposon_protein,_putative,_CACTA,_En/Spm_sub-class
LOC_Os07g31370	7-18579396	0.00335888	ras-related_protein,_putative,_expressed
LOC_Os11g40790	11-24397567	0.00336833	expressed_protein
LOC_Os03g36630	3-20314755	0.00337286	expressed_protein
LOC_Os05g15610	5-8844654	0.00337688	expressed_protein
LOC_Os03g40830	3-22704140	0.00337742	OsSub30_-_Putative_Subtilisin_homologue,_expressed
LOC_Os08g08870	8-5152915	0.00338118	retrotransposon_protein,_putative,_Ty1-copia_subclass,_expressed
LOC_Os05g24250	5-14027175	0.0033893	retrotransposon_protein,_putative,_Ty3-gypsy_subclass,_expressed
LOC_Os03g49110	3-27973193	0.00338994	retrotransposon_protein,_putative,_unclassified,_expressed
LOC_Os02g22050	2-13112291	0.00339501	retrotransposon_protein,_putative,_unclassified,_expressed
LOC_Os10g02260	10-808629	0.00339632	peptide_transporter_PTR2,_putative,_expressed
LOC_Os01g21120	1-11784088	0.00339728	AP2_domain_containing_protein,_expressed
LOC_Os01g21210	1-11831618	0.00339728	retrotransposon_protein,_putative,_unclassified,_expressed
LOC_Os01g21260	1-11878599	0.00339728	hypothetical_protein
LOC_Os02g25410	2-14814849	0.00340637	expressed_protein
LOC_Os11g33060	11-19545686	0.00340839	retrotransposon_protein,_putative,_unclassified,_expressed
LOC_Os06g23750	6-13877887	0.00342379	expressed_protein
LOC_Os11g14610	11-8232903	0.00343529	retrotransposon_protein,_putative,_Ty3-gypsy_subclass,_expressed
LOC_Os11g44000	11-26584249	0.00344125	expressed_protein
LOC_Os06g01720	6-422175	0.00345067	expressed_protein
LOC_Os06g37820	6-22379478	0.00346513	Leucine_Rich_Repeat_family_protein,_expressed
LOC_Os06g03770	6-1493787	0.00346832	ABC_transporter,_ATP-binding_protein,_putative,_expressed
LOC_Os01g55549	1-32007557	0.00347039	homeobox_and_START_domains_containing_protein,_putative,_expressed
LOC_Os12g02970	12-1098755	0.00347812	RNA_binding_protein,_putative,_expressed
LOC_Os06g15460	6-8776142	0.00347871	retrotransposon_protein,_putative,_Ty1-copia_subclass,_expressed
LOC_Os03g60550	3-34412897	0.00348344	ThiF_family_domain_containing_protein,_putative,_expressed
LOC_Os11g13960	11-7726170	0.00348691	retrotransposon_protein,_putative,_Ty1-copia_subclass,_expressed
LOC_Os08g25210	8-15317512	0.00349412	expressed_protein
LOC_Os04g57260	4-34101587	0.00349428	expressed_protein
LOC_Os08g17259	8-10561980	0.0034966	retrotransposon_protein,_putative,_unclassified
LOC_Os03g39780	3-22133640	0.0034996	retrotransposon_protein,_putative,_unclassified,_expressed
LOC_Os01g50020	1-28735756	0.00350189	expressed_protein
LOC_Os01g50040	1-28748498	0.00350189	DNA_binding_protein,_putative,_expressed
LOC_Os08g40290	8-25505460	0.00350831	retrotransposon_protein,_putative,_unclassified,_expressed
LOC_Os06g24490	6-14347330	0.00351205	expressed_protein
LOC_Os01g40870	1-23113859	0.00351901	aldehyde_dehydrogenase,_putative,_expressed
LOC_Os08g25080	8-15229027	0.00351954	expressed_protein
LOC_Os12g21730	12-12219887	0.00352059	retrotransposon_protein,_putative,_unclassified,_expressed
LOC_Os08g25260	8-15344630	0.00352061	transposon_protein,_putative,_unclassified,_expressed
LOC_Os08g30990	8-19130565	0.00352159	retrotransposon_protein,_putative,_unclassified,_expressed
LOC_Os07g26190	7-15060350	0.00352346	retrotransposon_protein,_putative,_unclassified
LOC_Os02g55030	2-33716841	0.00352381	hydrolase,_NUDIX_family,_domain_containing_protein,_expressed
LOC_Os04g04950	4-2396118	0.00352487	copper_methylamine_oxidase_precursor,_putative,_expressed
LOC_Os01g12910	1-7173887	0.00352881	thioesterase_family_protein,_putative,_expressed
LOC_Os01g12860	1-7115910	0.00353469	MYB_family_transcription_factor,_putative,_expressed
LOC_Os11g41380	11-24835883	0.00354056	transposon_protein,_putative,_unclassified,_expressed
LOC_Os02g38804	2-23455503	0.00355599	protein_phosphatase_2C_containing_protein,_expressed
LOC_Os05g25470	5-14805962	0.00355748	transposon_protein,_putative,_unclassified,_expressed
LOC_Os06g36580	6-21489776	0.00356321	retrotransposon_protein,_putative,_unclassified
LOC_Os04g10880	4-5902443	0.00356699	retrotransposon_protein,_putative,_unclassified,_expressed
LOC_Os07g45830	7-27351561	0.00356733	retrotransposon_protein,_putative,_Ty3-gypsy_subclass,_expressed
LOC_Os11g14000	11-7771072	0.00357016	ANTH_domain_containing_protein,_expressed
LOC_Os02g14800	2-8213372	0.00357945	expressed_protein
LOC_Os06g23200	6-13550617	0.00359044	retrotransposon_protein,_putative,_Ty3-gypsy_subclass,_expressed
LOC_Os07g17910	7-10595130	0.0035923	retrotransposon_protein,_putative,_unclassified,_expressed
LOC_Os05g18980	5-11017766	0.00359873	transposon_protein,_putative,_CACTA,_En/Spm_sub-class,_expressed
LOC_Os01g35840	1-19850801	0.00360337	expressed_protein
LOC_Os02g48390	2-29625878	0.00360746	phosphoribosyl_transferase,_putative,_expressed
LOC_Os12g23010	12-13009296	0.00360985	retrotransposon_protein,_putative,_unclassified,_expressed
LOC_Os05g19530	5-11350971	0.00361187	retrotransposon_protein,_putative,_Ty3-gypsy_subclass,_expressed
LOC_Os06g08470	6-4165534	0.00361444	expressed_protein
LOC_Os07g04000	7-1688218	0.00361504	lectin-like_receptor_kinase,_putative,_expressed
LOC_Os06g22919	6-13384787	0.00362028	DEFL9_-_Defensin_and_Defensin-like_DEFL_family,_expressed
LOC_Os01g09690	1-4993376	0.00363588	hypothetical_protein
LOC_Os08g17180	8-10527514	0.00363632	retrotransposon_protein,_putative,_Ty3-gypsy_subclass,_expressed
LOC_Os06g03790	6-1513997	0.00364291	39S_ribosomal_protein_L47,_mitochondrial_precursor,_putative,_expressed
LOC_Os04g23930	4-13686467	0.0036432	retrotransposon_protein,_putative,_unclassified,_expressed
LOC_Os06g12600	6-6847250	0.00365252	kinase,_pfkB_family,_putative,_expressed
LOC_Os05g01250	5-176845	0.00365398	SNF7_domain_containing_protein,_putative,_expressed
LOC_Os05g25430	5-14787870	0.0036603	receptor-like_protein_kinase_At3g46290_precursor,_putative,_expressed
LOC_Os08g13940	8-8348496	0.00366085	expressed_protein
LOC_Os06g18930	6-10757246	0.00366243	cadmium_tolerance_factor,_putative,_expressed
LOC_Os01g64070	1-37211547	0.00366339	retrotransposon_protein,_putative,_Ty3-gypsy_subclass,_expressed
LOC_Os07g09900	7-5267192	0.00366483	disease_resistance_protein_RPM1,_putative,_expressed
LOC_Os03g48410	3-27568291	0.00367634	hypothetical_protein
LOC_Os05g47870	5-27452538	0.0036794	expressed_protein
LOC_Os08g12920	8-7679703	0.00368282	retrotransposon_protein,_putative,_unclassified,_expressed
LOC_Os04g10290	4-5560163	0.0036857	expressed_protein
LOC_Os08g23380	8-14133079	0.00368783	retrotransposon_protein,_putative,_unclassified,_expressed
LOC_Os07g44290	7-26468792	0.00368865	CAMK_KIN1/SNF1/Nim1_like.29_-_CAMK_includes_calcium/calmodulin_depedent_protein_kinases,_expressed
LOC_Os07g49440	7-29606922	0.00368879	retrotransposon_protein,_putative,_unclassified,_expressed
LOC_Os06g24010	6-14027986	0.00369678	hypothetical_protein
LOC_Os01g47890	1-27411074	0.0036995	retrotransposon_protein,_putative,_unclassified,_expressed
LOC_Os01g21190	1-11821078	0.00370363	transposon_protein,_putative,_unclassified,_expressed
LOC_Os12g22230	12-12529674	0.00371301	retrotransposon_protein,_putative,_unclassified,_expressed
LOC_Os06g25530	6-14930593	0.00371326	retrotransposon_protein,_putative,_unclassified,_expressed
LOC_Os05g18280	5-10530162	0.00371893	kelch_domain_containing_protein,_putative,_expressed
LOC_Os08g17110	8-10469872	0.00371919	expressed_protein
LOC_Os02g01840	2-461587	0.00372136	retrotransposon_protein,_putative,_unclassified,_expressed
LOC_Os04g33010	4-19972385	0.00372422	transposon_protein,_putative,_unclassified,_expressed
LOC_Os01g24800	1-13965477	0.00372677	retrotransposon_protein,_putative,_unclassified,_expressed
LOC_Os01g41100	1-23276371	0.00372934	retrotransposon_protein,_putative,_unclassified,_expressed
LOC_Os07g47010	7-28091425	0.00373098	transposon_protein,_putative,_unclassified,_expressed
LOC_Os08g22650	8-13627132	0.00373187	retrotransposon_protein,_putative,_Ty3-gypsy_subclass,_expressed
LOC_Os06g22520	6-13085403	0.00373924	retrotransposon_protein,_putative,_Ty3-gypsy_subclass,_expressed
LOC_Os06g15440	6-8771494	0.00373934	expressed_protein
LOC_Os10g19338	10-9873045	0.00374663	retrotransposon_protein,_putative,_Ty1-copia_subclass
LOC_Os10g34180	10-18242236	0.00374777	transcription_factor_BTF3,_putative,_expressed
LOC_Os10g34200	10-18246194	0.00374777	expressed_protein
LOC_Os11g13860	11-7644402	0.00375426	cyclin-dependent_kinase,_putative,_expressed
LOC_Os01g25990	1-14731713	0.00375691	expressed_protein
LOC_Os08g08180	8-4659517	0.00375823	retrotransposon_protein,_putative,_Ty3-gypsy_subclass
LOC_Os03g40870	3-22723064	0.00376064	retrotransposon_protein,_putative,_Ty3-gypsy_subclass,_expressed
LOC_Os01g56830	1-32824004	0.00376315	transposon_protein,_putative,_unclassified,_expressed
LOC_Os09g07610	9-3820888	0.00376516	retrotransposon_protein,_putative,_unclassified,_expressed
LOC_Os11g35590	11-20867013	0.00376794	retrotransposon_protein,_putative,_unclassified,_expressed
LOC_Os07g28050	7-16355931	0.00377057	retrotransposon_protein,_putative,_unclassified,_expressed
LOC_Os04g09654	4-5180752	0.00377084	O-methyltransferase,_putative,_expressed
LOC_Os01g54830	1-31535280	0.00377106	retrotransposon_protein,_putative,_Ty3-gypsy_subclass,_expressed
LOC_Os03g22860	3-13216074	0.00377898	retrotransposon_protein,_putative,_unclassified,_expressed
LOC_Os09g13530	9-7843979	0.00378036	zinc_finger_C-x8-C-x5-C-x3-H_type_family_protein,_expressed
LOC_Os03g02762	3-1078517	0.00378067	PPR_repeat_domain_containing_protein,_putative,_expressed
LOC_Os03g02770	3-1078517	0.00378067	expressed_protein
LOC_Os05g23290	5-13295591	0.00378496	retrotransposon_protein,_putative,_Ty3-gypsy_subclass,_expressed
LOC_Os04g54640	4-32483303	0.00378693	peptidase,_cysteine_peptidase_active_site,_putative,_expressed
LOC_Os08g16780	8-10258037	0.00378859	sin-like_protein_conserved_region_containing_protein,_expressed
LOC_Os08g43900	8-27676201	0.00379214	carrier,_putative,_expressed
LOC_Os10g17410	10-8776776	0.00379428	retrotransposon_protein,_putative,_unclassified,_expressed
LOC_Os05g48510	5-27801125	0.00380201	phenylalanyl-tRNA_synthetase_beta_chain,_putative,_expressed
LOC_Os11g33020	11-19518327	0.003804	transposon_protein,_putative,_CACTA,_En/Spm_sub-class
LOC_Os08g22790	8-13702432	0.00380716	retrotransposon_protein,_putative,_unclassified,_expressed
LOC_Os09g12980	9-7486159	0.00381332	retrotransposon_protein,_putative,_LINE_subclass
LOC_Os06g03800	6-1525747	0.00381528	pollen_ankyrin,_putative,_expressed
LOC_Os04g52880	4-31494029	0.00382018	expressed_protein
LOC_Os07g29224	7-17128927	0.00383666	expressed_protein
LOC_Os03g51610	3-29536446	0.00384331	Inositol_1,_3,_4-trisphosphate_5/6-kinase,_putative,_expressed
LOC_Os01g09770	1-5037986	0.00385534	expressed_protein
LOC_Os05g01350	5-215850	0.00385648	retrotransposon_protein,_putative,_unclassified,_expressed
LOC_Os01g13000	1-7217238	0.00386105	ethylene-responsive_protein_related,_putative,_expressed
LOC_Os06g11630	6-6160908	0.00386586	OsFBX192_-_F-box_domain_containing_protein,_expressed
LOC_Os04g53360	4-31779527	0.00386633	expressed_protein
LOC_Os12g35840	12-21840695	0.00386654	transposon_protein,_putative,_CACTA,_En/Spm_sub-class
LOC_Os11g29700	11-17210820	0.00386996	expressed_protein
LOC_Os08g17820	8-10934303	0.00387368	retrotransposon_protein,_putative,_unclassified,_expressed
LOC_Os10g17620	10-8905532	0.00387571	retrotransposon_protein,_putative,_unclassified,_expressed
LOC_Os04g41170	4-24420511	0.00387994	retrotransposon_protein,_putative,_unclassified,_expressed
LOC_Os01g32030	1-17535819	0.0038884	retrotransposon,_putative,_centromere-specific
LOC_Os04g53350	4-31773160	0.00389634	expressed_protein
LOC_Os03g04195	3-1928330	0.00389925	expressed_protein
LOC_Os08g09720	8-5619503	0.00390134	OsFBX272_-_F-box_domain_containing_protein,_expressed
LOC_Os12g21500	12-12083699	0.00390327	exosome_complex_exonuclease,_putative,_expressed
LOC_Os08g16130	8-9831756	0.00390373	fiber_protein_Fb34,_putative,_expressed
LOC_Os06g11620	6-6156036	0.0039066	RNA_recognition_motif_containing_protein,_putative,_expressed
LOC_Os03g13690	3-7404658	0.00390819	expressed_protein
LOC_Os02g12390	2-6457077	0.00390852	retrotransposon_protein,_putative,_Ty1-copia_subclass,_expressed
LOC_Os07g16610	7-9747825	0.00391102	retrotransposon_protein,_putative,_Ty1-copia_subclass,_expressed
LOC_Os12g12450	12-6854543	0.00392177	retrotransposon_protein,_putative,_unclassified,_expressed
LOC_Os05g47910	5-27466053	0.00393195	retrotransposon_protein,_putative,_unclassified,_expressed
LOC_Os06g01220	6-151251	0.00393948	expressed_protein
LOC_Os04g16400	4-8911420	0.00394097	retrotransposon_protein,_putative,_Ty3-gypsy_subclass,_expressed
LOC_Os06g08450	6-4148701	0.00394315	histidine_kinase,_putative,_expressed
LOC_Os01g50730	1-29147976	0.00394563	expressed_protein
LOC_Os09g10840	9-5924986	0.00395052	transcription_factor,_putative,_expressed
LOC_Os01g49065	1-28195724	0.00395725	expressed_protein
LOC_Os03g42480	3-23633899	0.00395862	expressed_protein
LOC_Os09g02930	9-1376598	0.00395987	retrotransposon_protein,_putative,_Ty3-gypsy_subclass,_expressed
LOC_Os05g29780	5-17230668	0.00396945	retrotransposon_protein,_putative,_unclassified,_expressed
LOC_Os08g08970	8-5223171	0.0039716	Cupin_domain_containing_protein,_expressed
LOC_Os01g31629	1-17311696	0.00397702	expressed_protein
LOC_Os08g23120	8-13932095	0.0039771	RNA_recognition_motif_containing_protein,_putative,_expressed
LOC_Os09g21020	9-12677558	0.00398906	retrotransposon_protein,_putative,_Ty1-copia_subclass,_expressed
LOC_Os11g19230	11-10994866	0.00399064	retrotransposon_protein,_putative,_Ty1-copia_subclass,_expressed
LOC_Os04g12560	4-6955323	0.00399071	receptor-like_protein_kinase,_putative,_expressed
LOC_Os07g34529	7-20704695	0.00399171	expressed_protein
LOC_Os01g59770	1-34570417	0.00399452	expressed_protein
LOC_Os06g40900	6-24387669	0.00400064	retrotransposon_protein,_putative,_unclassified,_expressed
LOC_Os11g31820	11-18690747	0.00400158	expressed_protein
LOC_Os01g21144	1-11801522	0.00400362	expressed_protein
LOC_Os12g09420	12-4935126	0.00400664	transposon_protein,_putative,_CACTA,_En/Spm_sub-class
LOC_Os11g35340	11-20721320	0.00400929	methyltransferase,_putative,_expressed
LOC_Os01g06270	1-2972137	0.0040094	expressed_protein
LOC_Os06g23930	6-13979264	0.00401609	expressed_protein
LOC_Os02g28510	2-16864383	0.00402174	retrotransposon_protein,_putative,_Ty3-gypsy_subclass,_expressed
LOC_Os02g14160	2-7752358	0.00402389	peroxidase_precursor,_putative,_expressed
LOC_Os03g36360	3-20160240	0.00402451	retrotransposon_protein,_putative,_Ty3-gypsy_subclass,_expressed
LOC_Os08g23140	8-13945996	0.00402511	expressed_protein
LOC_Os08g16540	8-10123991	0.00402915	retrotransposon_protein,_putative,_unclassified,_expressed
LOC_Os08g24340	8-14696521	0.00403378	expressed_protein
LOC_Os03g46820	3-26476545	0.00403717	spidroin-1,_putative,_expressed
LOC_Os05g29700	5-17168658	0.00403948	retrotransposon,_putative,_centromere-specific,_expressed
LOC_Os08g15650	8-9507224	0.00404046	expressed_protein
LOC_Os08g22930	8-13785208	0.00404266	conserved_hypothetical_protein
LOC_Os06g01650	6-390722	0.00404359	expressed_protein
LOC_Os03g40920	3-22741524	0.00405872	expressed_protein
LOC_Os02g41690	2-25032987	0.00405958	retrotransposon_protein,_putative,_unclassified,_expressed
LOC_Os07g31800	7-18904506	0.00406336	NB-ARC_domain_containing_protein,_expressed
LOC_Os12g33360	12-20175824	0.00406781	retrotransposon_protein,_putative,_Ty3-gypsy_subclass,_expressed
LOC_Os01g33142	1-18249756	0.0040683	hypothetical_protein
LOC_Os07g33360	7-19938475	0.00406977	expressed_protein
LOC_Os12g43730	12-27162884	0.00407232	expressed_protein
LOC_Os01g56900	1-32863460	0.0040736	expressed_protein
LOC_Os08g17360	8-10615061	0.00408073	hypothetical_protein
LOC_Os12g06350	12-3045715	0.00408127	retrotransposon_protein,_putative,_unclassified,_expressed
LOC_Os06g30040	6-17304540	0.00408531	retrotransposon_protein,_putative,_Ty3-gypsy_subclass,_expressed
LOC_Os10g34170	10-18232294	0.00409099	glutaredoxin_domain_containing_protein,_putative,_expressed
LOC_Os01g73560	1-42618514	0.00409187	leucine_rich_repeat_domain_containing_protein,_putative,_expressed
LOC_Os11g36390	11-21451389	0.00409702	RFC1_-_Putative_clamp_loader_of_PCNA,_replication_factor_C_subunit_1,_expressed
LOC_Os01g12880	1-7131134	0.00409835	VHS_and_GAT_domain_containing_protein,_expressed
LOC_Os07g18120	7-10725714	0.00410006	aldehyde_oxidase,_putative,_expressed
LOC_Os09g16930	9-10354322	0.00410443	retrotransposon_protein,_putative,_Ty1-copia_subclass,_expressed
LOC_Os03g17020	3-9455853	0.00410686	GTPase-activating_protein,_putative,_expressed
LOC_Os05g01610	5-364542	0.00411486	FYVE_zinc_finger_domain_containing_protein,_expressed
LOC_Os09g34880	9-20329057	0.00412146	basic_region_leucine_zipper_domain_containing_protein,_expressed
LOC_Os08g08910	8-5180658	0.00412476	hypothetical_protein
LOC_Os11g14930	11-8401912	0.00413129	expressed_protein
LOC_Os08g08830	8-5119872	0.00413849	expressed_protein
LOC_Os08g25180	8-15298293	0.00414749	retrotransposon_protein,_putative,_unclassified
LOC_Os04g58450	4-34772630	0.0041525	retrotransposon_protein,_putative,_unclassified,_expressed
LOC_Os01g39720	1-22402485	0.00415269	retrotransposon_protein,_putative,_unclassified,_expressed
LOC_Os08g17090	8-10459490	0.00415344	retrotransposon_protein,_putative,_unclassified,_expressed
LOC_Os01g62520	1-36209550	0.00415447	retrotransposon_protein,_putative,_unclassified
LOC_Os11g10140	11-5491421	0.00415757	flavin_monooxygenase,_putative,_expressed
LOC_Os02g25090	2-14568012	0.00416554	retrotransposon_protein,_putative,_Ty3-gypsy_subclass,_expressed
LOC_Os02g28320	2-16737841	0.0041681	retrotransposon_protein,_putative,_unclassified,_expressed
LOC_Os05g27390	5-15922302	0.00416865	retrotransposon_protein,_putative,_unclassified
LOC_Os04g53280	4-31735159	0.00418334	retrotransposon_protein,_putative,_Ty3-gypsy_subclass,_expressed
LOC_Os04g56530	4-33710394	0.00419832	STE_MEKK_ste11_MAP3K.1_-_STE_kinases_include_homologs_to_sterile_7,_sterile_11_and_sterile_20_from_yeast,_expressed
LOC_Os11g15120	11-8514970	0.00420113	retrotransposon_protein,_putative,_Ty3-gypsy_subclass,_expressed
LOC_Os06g04100	6-1712704	0.00420173	conserved_hypothetical_protein
LOC_Os03g14370	3-7815805	0.00420324	ACT_domain_containing_protein,_expressed
LOC_Os01g56520	1-32590260	0.0042165	double-stranded_RNA_binding_motif_containing_protein,_expressed
LOC_Os08g21290	8-12705956	0.00422805	retrotransposon_protein,_putative,_Ty3-gypsy_subclass
LOC_Os06g30830	6-17888909	0.00423262	OsMADS76_-_MADS-box_family_gene_with_M-alpha_type-box,_expressed
LOC_Os06g39380	6-23372313	0.0042334	hypothetical_protein
LOC_Os02g01480	2-276902	0.00423465	nucleic_acid_binding_protein,_putative,_expressed
LOC_Os12g24760	12-14203858	0.00423593	retrotransposon_protein,_putative,_Ty3-gypsy_subclass,_expressed
LOC_Os10g12590	10-7010474	0.00424567	retrotransposon_protein,_putative,_Ty3-gypsy_subclass,_expressed
LOC_Os05g15060	5-8552702	0.00424818	retrotransposon_protein,_putative,_Ty3-gypsy_subclass,_expressed
LOC_Os02g40070	2-24261906	0.00425121	AP2-like_ethylene-responsive_transcription_factor_PLETHORA_2,_putative,_expressed
LOC_Os01g13620	1-7635811	0.0042659	retrotransposon_protein,_putative,_unclassified,_expressed
LOC_Os05g44740	5-26011080	0.00427313	transposon_protein,_putative,_unclassified,_expressed
LOC_Os04g10410	4-5647376	0.0042759	amidase,_putative,_expressed
LOC_Os02g13240	2-7054433	0.00428797	transposon_protein,_putative,_CACTA,_En/Spm_sub-class
LOC_Os01g73450	1-42565152	0.00428805	amino_acid_kinase,_putative,_expressed
LOC_Os09g28970	9-17620768	0.00429021	retrotransposon_protein,_putative,_unclassified,_expressed
LOC_Os03g23990	3-13617001	0.00429928	retrotransposon_protein,_putative,_unclassified,_expressed
LOC_Os04g12570	4-6959325	0.00430106	hypothetical_protein
LOC_Os07g33450	7-19996091	0.00430268	retrotransposon_protein,_putative,_unclassified,_expressed
LOC_Os04g53250	4-31722701	0.00430495	polyphenol_oxidase_protein,_putative,_expressed
LOC_Os06g26234	6-15355850	0.0043132	1,4-alpha-glucan-branching_enzyme,_putative,_expressed
LOC_Os03g17634	3-9808592	0.00431328	PPR_repeat_domain_containing_protein,_putative,_expressed
LOC_Os02g01450	2-268764	0.00431382	expressed_protein
LOC_Os08g02950	8-1285982	0.00431969	expressed_protein
LOC_Os12g10680	12-5716972	0.00432672	retrotransposon_protein,_putative,_unclassified,_expressed
LOC_Os01g73604	1-42644943	0.00432673	LSM_domain_containing_protein,_expressed
LOC_Os08g16850	8-10301521	0.00433461	expressed_protein
LOC_Os02g22240	2-13262089	0.00433575	retrotransposon_protein,_putative,_unclassified,_expressed
LOC_Os06g14390	6-8034037	0.00434967	1-aminocyclopropane-1-carboxylate_oxidase_homolog_4,_putative,_expressed
LOC_Os05g34750	5-20615871	0.0043546	retrotransposon_protein,_putative,_Ty1-copia_subclass,_expressed
LOC_Os01g12920	1-7176119	0.00435974	thioesterase_family_protein,_putative,_expressed
LOC_Os12g29000	12-17156976	0.00436096	retrotransposon_protein,_putative,_Ty3-gypsy_subclass,_expressed
LOC_Os03g48690	3-27754081	0.00436686	retrotransposon_protein,_putative,_unclassified,_expressed
LOC_Os08g25820	8-15711608	0.00437312	myb-like_DNA-binding_domain_containing_protein,_expressed
LOC_Os08g21760	8-13030379	0.00438064	Rer1_protein,_putative,_expressed
LOC_Os08g17070	8-10448967	0.00438203	retrotransposon_protein,_putative,_unclassified,_expressed
LOC_Os06g22970	6-13412851	0.00438248	expressed_protein
LOC_Os01g50610	1-29050857	0.00439438	SAM_dependent_carboxyl_methyltransferase,_putative,_expressed
LOC_Os04g33090	4-20035779	0.00440065	retrotransposon_protein,_putative,_unclassified,_expressed
LOC_Os01g47262	1-27009253	0.00440317	AMSH-like_protease,_putative,_expressed
LOC_Os09g06290	9-2947119	0.00440474	retrotransposon,_putative,_centromere-specific,_expressed
LOC_Os12g17190	12-9842910	0.00440849	retrotransposon_protein,_putative,_unclassified,_expressed
LOC_Os10g24750	10-12732874	0.00441157	retrotransposon_protein,_putative,_Ty3-gypsy_subclass,_expressed
LOC_Os05g28670	5-16817972	0.00441278	retrotransposon_protein,_putative,_unclassified,_expressed
LOC_Os12g09400	12-4929167	0.00441296	retrotransposon_protein,_putative,_Ty1-copia_subclass
LOC_Os01g29270	1-16412514	0.00441609	retrotransposon_protein,_putative,_unclassified,_expressed
LOC_Os09g07530	9-3772679	0.00441796	retrotransposon_protein,_putative,_unclassified
LOC_Os07g47020	7-28094662	0.00441807	transposon_protein,_putative,_unclassified,_expressed
LOC_Os07g31660	7-18807037	0.00442012	expressed_protein
LOC_Os06g11610	6-6152190	0.00442113	heat_shock_22_kDa_protein,_mitochondrial_precursor,_putative,_expressed
LOC_Os06g23620	6-13775551	0.00442372	expressed_protein
LOC_Os03g18270	3-10245342	0.00442629	expressed_protein
LOC_Os08g17784	8-10900261	0.00442728	purple_acid_phosphatase,_putative,_expressed
LOC_Os01g12020	1-6541713	0.0044298	LTPL18_-_Protease_inhibitor/seed_storage/LTP_family_protein_precursor,_expressed
LOC_Os12g17170	12-9833129	0.0044319	retrotransposon_protein,_putative,_Ty3-gypsy_subclass,_expressed
LOC_Os06g23010	6-13429870	0.00443355	conserved_hypothetical_protein
LOC_Os05g26590	5-15446076	0.00443886	retrotransposon_protein,_putative,_unclassified,_expressed
LOC_Os08g34470	8-21631231	0.00444799	expressed_protein
LOC_Os04g18700	4-10362968	0.00444904	retrotransposon_protein,_putative,_Ty3-gypsy_subclass,_expressed
LOC_Os07g31270	7-18511290	0.00445244	cupin_2,_conserved_barrel_domain_protein,_putative,_expressed
LOC_Os07g31360	7-18576035	0.00445244	hypothetical_protein
LOC_Os08g17420	8-10673059	0.00445393	retrotransposon_protein,_putative,_unclassified,_expressed
LOC_Os12g43260	12-26851982	0.00445484	retrotransposon_protein,_putative,_unclassified,_expressed
LOC_Os11g16450	11-9101088	0.00446309	retrotransposon_protein,_putative,_Ty3-gypsy_subclass,_expressed
LOC_Os08g16720	8-10222297	0.00446614	retrotransposon_protein,_putative,_unclassified,_expressed
LOC_Os08g16940	8-10372740	0.00446687	ZOS8-01_-_C2H2_zinc_finger_protein,_expressed
LOC_Os01g24040	1-13545613	0.00446696	retrotransposon_protein,_putative,_Ty1-copia_subclass,_expressed
LOC_Os04g11090	4-6037114	0.00447092	retrotransposon_protein,_putative,_unclassified,_expressed
LOC_Os01g72980	1-42329762	0.00447276	tRNA_uridine_5-carboxymethylaminomethyl_modification_enzyme_gidA,_putative,_expressed
LOC_Os08g16460	8-10079833	0.00447349	NBS-LRR_disease_resistance_protein,_putative,_expressed
LOC_Os04g59190	4-35207076	0.00447593	peroxidase_precursor,_putative,_expressed
LOC_Os01g50680	1-29105754	0.00448336	OsSub2_-_Putative_Subtilisin_homologue,_expressed
LOC_Os06g27700	6-15686795	0.00448803	retrotransposon_protein,_putative,_unclassified,_expressed
LOC_Os03g49770	3-28338564	0.00448917	oxysterol-binding_protein,_putative,_expressed
LOC_Os08g40060	8-25366089	0.00449755	expressed_protein
LOC_Os10g39170	10-20901302	0.0045005	peroxidase_precursor,_putative,_expressed
LOC_Os01g02690	1-915759	0.00450725	resistance-related_receptor-like_kinase,_putative,_expressed
LOC_Os11g27090	11-15588642	0.0045101	retrotransposon_protein,_putative,_unclassified,_expressed
LOC_Os07g05490	7-2563395	0.00451465	transposon_protein,_putative,_CACTA,_En/Spm_sub-class
LOC_Os12g24600	12-14074245	0.00452548	retrotransposon_protein,_putative,_unclassified,_expressed
LOC_Os03g33690	3-19270660	0.00452581	retrotransposon_protein,_putative,_unclassified,_expressed
LOC_Os07g12340	7-6968002	0.00452759	NAC_domain-containing_protein_67,_putative,_expressed
LOC_Os05g01280	5-190782	0.00454075	expressed_protein
LOC_Os05g22530	5-12794731	0.00454217	retrotransposon_protein,_putative,_unclassified,_expressed
LOC_Os12g43630	12-27095017	0.00454497	lactate/malate_dehydrogenase,_putative,_expressed
LOC_Os08g14610	8-8786705	0.00454859	DRD1,_putative,_expressed
LOC_Os03g42370	3-23567557	0.00455062	B3_DNA_binding_domain_containing_protein,_expressed
LOC_Os12g35380	12-21514871	0.00455177	transposon_protein,_putative,_CACTA,_En/Spm_sub-class,_expressed
LOC_Os08g21330	8-12717184	0.0045524	formamidopyrimidine-DNA_glycosylase,_putative,_expressed
LOC_Os11g28790	11-16689561	0.00455586	retrotransposon_protein,_putative,_unclassified,_expressed
LOC_Os02g19270	2-11255571	0.00455601	retrotransposon_protein,_putative,_Ty3-gypsy_subclass,_expressed
LOC_Os01g49800	1-28596992	0.00456851	expressed_protein
LOC_Os01g19650	1-11143252	0.00457644	retrotransposon_protein,_putative,_Ty3-gypsy_subclass,_expressed
LOC_Os08g09770	8-5646427	0.00458084	DnaK_family_protein,_putative,_expressed
LOC_Os11g14010	11-7776721	0.00458919	PHD_finger_protein,_putative,_expressed
LOC_Os01g47280	1-27018086	0.00459014	expressed_protein
LOC_Os06g29150	6-16636290	0.0045903	retrotransposon_protein,_putative,_unclassified,_expressed
LOC_Os01g55530	1-31992806	0.00459554	AP003256-AK101847_-_NBS/LRR_genes_that_are_S-rich,divergent_TIR,_divergent_NBS,_expressed
LOC_Os01g50010	1-28730447	0.0045959	clathrin_assembly_protein,_putative,_expressed
LOC_Os03g42284	3-23530378	0.004597	hypothetical_protein
LOC_Os11g03550	11-1373574	0.0046005	expressed_protein
LOC_Os10g04590	10-2188013	0.00460336	OsFBX358_-_F-box_domain_containing_protein,_expressed
LOC_Os03g38310	3-21260777	0.0046039	retrotransposon_protein,_putative,_unclassified
LOC_Os11g43590	11-26304017	0.00460427	kelch_repeat_protein,_putative,_expressed
LOC_Os08g32960	8-20450290	0.00460441	endonuclease/exonuclease/phosphatase_family_domain_containing_protein,_expressed
LOC_Os11g07180	11-3589738	0.00460539	receptor_protein_kinase_CLAVATA1_precursor,_putative,_expressed
LOC_Os11g37980	11-22515994	0.00460934	GAUT2/LGT2,_putative,_expressed
LOC_Os10g40180	10-21508456	0.00461205	retrotransposon_protein,_putative,_unclassified,_expressed
LOC_Os06g01350	6-213169	0.00461213	transferase_family_protein,_putative,_expressed
LOC_Os08g24010	8-14521852	0.00461518	retrotransposon_protein,_putative,_unclassified
LOC_Os11g28910	11-16731030	0.00461715	transposon_protein,_putative,_CACTA,_En/Spm_sub-class,_expressed
LOC_Os08g17080	8-10453882	0.00462665	PPR_repeat_domain_containing_protein,_putative,_expressed
LOC_Os09g03570	9-1758063	0.00462799	retrotransposon,_putative,_centromere-specific,_expressed
LOC_Os01g04440	1-1974789	0.00463011	expressed_protein
LOC_Os09g21890	9-13254498	0.00463032	retrotransposon_protein,_putative,_unclassified,_expressed
LOC_Os06g14180	6-7916298	0.00464095	expressed_protein
LOC_Os07g13710	7-7871010	0.00464406	retrotransposon_protein,_putative,_unclassified,_expressed
LOC_Os01g55540	1-31998651	0.00464487	aminotransferase,_classes_I_and_II,_domain_containing_protein,_expressed
LOC_Os06g23560	6-13743397	0.00464496	anthocyanidin_5,3-O-glucosyltransferase,_putative,_expressed
LOC_Os07g31380	7-18588708	0.00464675	NAD-dependent_malic_enzyme,_mitochondrial_precursor,_putative,_expressed
LOC_Os02g25970	2-15250133	0.00465093	retrotransposon_protein,_putative,_unclassified,_expressed
LOC_Os01g01900	1-489381	0.0046512	retrotransposon_protein,_putative,_unclassified,_expressed
LOC_Os01g55240	1-31795200	0.00465253	gibberellin_2-beta-dioxygenase,_putative,_expressed
LOC_Os04g53240	4-31719013	0.00465835	autophagy-related_protein,_putative,_expressed
LOC_Os03g05980	3-2987761	0.00466051	40S_ribosomal_protein_S9-2,_putative,_expressed
LOC_Os02g26310	2-15453307	0.004661	expressed_protein
LOC_Os12g26204	12-15276070	0.00466634	transposon_protein,_putative,_unclassified,_expressed
LOC_Os12g06270	12-2984717	0.00467218	retrotransposon_protein,_putative,_unclassified,_expressed
LOC_Os08g16760	8-10249281	0.00467749	retrotransposon_protein,_putative,_unclassified,_expressed
LOC_Os03g46840	3-26498739	0.00467817	expressed_protein
LOC_Os06g33100	6-19271380	0.00467923	peroxidase_precursor,_putative,_expressed
LOC_Os01g49160	1-28250398	0.00468077	MYB_family_transcription_factor,_putative,_expressed
LOC_Os08g09740	8-5632189	0.00468094	OsFBX274_-_F-box_domain_containing_protein,_expressed
LOC_Os09g34000	9-20076707	0.00468101	expressed_protein
LOC_Os05g01262	5-182429	0.00468196	translocon-associated_protein_beta_domain_containing_protein,_expressed
LOC_Os05g01270	5-186446	0.00468196	peptidyl-prolyl_cis-trans_isomerase,_putative,_expressed
LOC_Os04g10434	4-5671522	0.00468732	amidase_family_protein,_putative,_expressed
LOC_Os10g33350	10-17544902	0.00468771	endo-beta-N-acetylglucosaminidase,_putative,_expressed
LOC_Os01g60660	1-35069419	0.00468873	methionyl-tRNA_synthetase,_putative,_expressed
LOC_Os08g17470	8-10698531	0.00468901	retrotransposon_protein,_putative,_unclassified,_expressed
LOC_Os11g30020	11-17463078	0.0046971	retrotransposon_protein,_putative,_Ty1-copia_subclass,_expressed
LOC_Os05g48280	5-27674011	0.00469949	expressed_protein
LOC_Os05g15820	5-8934869	0.00470003	retrotransposon_protein,_putative,_unclassified,_expressed
LOC_Os11g11290	11-6251436	0.00470198	retrotransposon_protein,_putative,_unclassified,_expressed
LOC_Os08g39600	8-25066311	0.00470513	RNA_methyltransferase,_TrmH_family_protein,_putative,_expressed
LOC_Os11g22700	11-13062693	0.00470571	retrotransposon_protein,_putative,_unclassified,_expressed
LOC_Os06g29530	6-16924571	0.00470646	retrotransposon_protein,_putative,_unclassified
LOC_Os06g01700	6-413519	0.00470976	CWC15_homolog_A,_putative,_expressed
LOC_Os09g33940	9-20030810	0.00470998	expressed_protein
LOC_Os08g24690	8-14917362	0.0047109	retrotransposon_protein,_putative,_unclassified,_expressed
LOC_Os02g57990	2-35508540	0.00472218	methionine_adenosyltransferase_regulatory_beta_subunit-related,_putative,_expressed
LOC_Os10g26200	10-13566948	0.0047295	retrotransposon_protein,_putative,_unclassified,_expressed
LOC_Os08g13630	8-8107077	0.00472999	expressed_protein
LOC_Os09g18020	9-11036143	0.00473236	senescence-induced_receptor-like_serine/threonine-protein_kinase_precursor,_putative,_expressed
LOC_Os08g09760	8-5638910	0.00473351	OsFBX275_-_F-box_domain_containing_protein,_expressed
LOC_Os10g20980	10-10623414	0.00473473	transposon_protein,_putative,_CACTA,_En/Spm_sub-class,_expressed
LOC_Os06g30520	6-17654721	0.00473643	retrotransposon_protein,_putative,_Ty3-gypsy_subclass,_expressed
LOC_Os08g25050	8-15199845	0.00473647	PIF-like_orf1,_putative,_expressed
LOC_Os09g34010	9-20078219	0.004739	expressed_protein
LOC_Os08g25220	8-15321664	0.00473907	retrotransposon_protein,_putative,_unclassified,_expressed
LOC_Os02g06640	2-3341091	0.00475049	ubiquitin_family_protein,_putative,_expressed
LOC_Os02g56565	2-34652183	0.00475222	endoribonuclease,_putative,_expressed
LOC_Os08g19440	8-11614558	0.00475251	retrotransposon_protein,_putative,_Ty3-gypsy_subclass,_expressed
LOC_Os09g02560	9-1064509	0.00475518	expressed_protein
LOC_Os11g41780	11-25106155	0.00475973	transposon_protein,_putative,_CACTA,_En/Spm_sub-class,_expressed
LOC_Os06g35690	6-20829805	0.00476361	hypothetical_protein
LOC_Os11g10200	11-5533977	0.00476408	OsFBX413_-_F-box_domain_containing_protein,_expressed
LOC_Os10g22770	10-11837292	0.00476736	expressed_protein
LOC_Os06g41840	6-25087994	0.00476858	reductase,_putative,_expressed
LOC_Os08g29770	8-18305993	0.00477552	endoglucanase,_putative,_expressed
LOC_Os06g15420	6-8759000	0.00477954	asparagine_synthetase,_putative,_expressed
LOC_Os01g15180	1-8509834	0.00477972	retrotransposon_protein,_putative,_Ty3-gypsy_subclass,_expressed
LOC_Os11g07830	11-3995734	0.00478093	dirigent,_putative,_expressed
LOC_Os10g23004	10-11995301	0.00478123	expressed_protein
LOC_Os08g10320	8-6033874	0.00478182	SHR5-receptor-like_kinase,_putative,_expressed
LOC_Os08g25870	8-15759535	0.00478424	retrotransposon_protein,_putative,_unclassified,_expressed
LOC_Os12g23840	12-13558559	0.0047913	transposon_protein,_putative,_CACTA,_En/Spm_sub-class,_expressed
LOC_Os02g18340	2-10658466	0.0047921	retrotransposon_protein,_putative,_Ty3-gypsy_subclass,_expressed
LOC_Os02g46870	2-28590349	0.0047927	transposon_protein,_putative,_CACTA,_En/Spm_sub-class,_expressed
LOC_Os11g18810	11-10674632	0.00479464	retrotransposon_protein,_putative,_Ty3-gypsy_subclass,_expressed
LOC_Os09g25610	9-15382354	0.00479527	class_I_glutamine_amidotransferase,_putative,_expressed
LOC_Os03g13350	3-7202520	0.00479712	retrotransposon_protein,_putative,_unclassified,_expressed
LOC_Os08g08900	8-5178117	0.00480968	expressed_protein
LOC_Os06g23170	6-13525759	0.00481041	retrotransposon_protein,_putative,_unclassified,_expressed
LOC_Os11g19960	11-11488568	0.00481374	retrotransposon_protein,_putative,_unclassified,_expressed
LOC_Os01g51590	1-29625004	0.00483995	expressed_protein
LOC_Os04g39030	4-23182546	0.00484129	peptide_transporter_PTR2,_putative,_expressed
LOC_Os08g17350	8-10613115	0.00484304	expressed_protein
LOC_Os05g01070	5-85579	0.00484793	expressed_protein
LOC_Os04g42120	4-24937821	0.00484833	N-acetyltransferase_ESCO2,_putative,_expressed
LOC_Os08g16190	8-9870801	0.00485026	retrotransposon_protein,_putative,_unclassified,_expressed
LOC_Os04g35950	4-21917225	0.00485102	retrotransposon_protein,_putative,_unclassified,_expressed
LOC_Os04g10420	4-5661053	0.00485357	CW7,_putative,_expressed
LOC_Os11g23160	11-13326606	0.00485408	retrotransposon_protein,_putative,_unclassified,_expressed
LOC_Os04g18690	4-10355087	0.00485726	retrotransposon_protein,_putative,_Ty3-gypsy_subclass,_expressed
LOC_Os08g21740	8-13022844	0.00486103	retrotransposon_protein,_putative,_unclassified,_expressed
LOC_Os02g16670	2-9527574	0.00486451	ATP-binding_domain-containing_protein,_putative,_expressed
LOC_Os05g15970	5-9020292	0.00486577	retrotransposon_protein,_putative,_Ty3-gypsy_subclass,_expressed
LOC_Os08g13590	8-8078940	0.00487879	retrotransposon_protein,_putative,_unclassified,_expressed
LOC_Os06g23020	6-13435043	0.0048827	expressed_protein
LOC_Os08g16250	8-9913733	0.0048867	transposon_protein,_putative,_CACTA,_En/Spm_sub-class
LOC_Os06g29750	6-17083861	0.00488832	retrotransposon_protein,_putative,_Ty3-gypsy_subclass,_expressed
LOC_Os06g22810	6-13298936	0.00489007	TKL_IRAK_CrRLK1L-1.14_-_The_CrRLK1L-1_subfamily_has_homology_to_the_CrRLK1L_homolog,_expressed
LOC_Os08g27230	8-16621975	0.00489066	expressed_protein
LOC_Os06g27440	6-15530319	0.00489124	conserved_hypothetical_protein
LOC_Os03g34096	3-19430673	0.00489305	retrotransposon_protein,_putative,_unclassified
LOC_Os01g09410	1-4793205	0.00489843	expressed_protein
LOC_Os08g24920	8-15089072	0.00489845	expressed_protein
LOC_Os07g35810	7-21443883	0.00489907	TKL_IRAK_DUF26-ld.6_-_DUF26_kinases_have_homology_to_DUF26_containing_loci,_expressed
LOC_Os08g24880	8-15060035	0.00490841	EDM2,_putative,_expressed
LOC_Os03g24000	3-13618803	0.00491055	retrotransposon_protein,_putative,_unclassified
LOC_Os06g37690	6-22331606	0.00491245	S-locus-like_receptor_protein_kinase,_putative,_expressed
LOC_Os04g54150	4-32262372	0.00491611	retrotransposon_protein,_putative,_unclassified,_expressed
LOC_Os11g40850	11-24439832	0.00493249	expressed_protein
LOC_Os07g26670	7-15385894	0.00493676	expressed_protein
LOC_Os05g16940	5-9657254	0.00493954	retrotransposon_protein,_putative,_unclassified
LOC_Os10g25880	10-13415259	0.00495387	retrotransposon_protein,_putative,_unclassified,_expressed
LOC_Os04g13800	4-7697961	0.00495547	retrotransposon_protein,_putative,_unclassified,_expressed
LOC_Os04g08415	4-4521400	0.0049659	expressed_protein
LOC_Os08g19220	8-11499150	0.00496715	transposon_protein,_putative,_CACTA,_En/Spm_sub-class,_expressed
LOC_Os09g21980	9-13305038	0.00496804	transposon_protein,_putative,_CACTA,_En/Spm_sub-class,_expressed
LOC_Os01g44130	1-25295388	0.00498018	aspartic_proteinase_oryzasin-1_precursor,_putative,_expressed
LOC_Os08g21680	8-12917057	0.00498497	retrotransposon,_putative,_centromere-specific,_expressed
LOC_Os01g72834	1-42250129	0.00498548	RNA_recognition_motif_containing_protein,_putative,_expressed
LOC_Os02g21390	2-12694373	0.004989	expressed_protein
LOC_Os01g21542	1-12053036	0.00498954	retrotransposon_protein,_putative,_unclassified,_expressed
LOC_Os02g48370	2-29613328	0.00499665	ARID/BRIGHT_DNA-binding_domain-containing_protein,_putative,_expressed
LOC_Os11g29274	11-16972062	0.00499877	conserved_hypothetical_protein
LOC_Os02g54640	2-33469821	0.0049988	glutamate_receptor,_putative,_expressed
LOC_Os04g49030	4-29228506	0.00499968	retrotransposon_protein,_putative,_unclassified
LOC_Os11g07840	11-3998599	0.00500284	expressed_protein
LOC_Os08g21420	8-12776696	0.00500324	retrotransposon,_putative,_centromere-specific,_expressed
LOC_Os04g43270	4-25601722	0.00500791	WAX2,_putative,_expressed
LOC_Os08g24280	8-14656808	0.00501198	transposon_protein,_putative,_CACTA,_En/Spm_sub-class,_expressed
LOC_Os10g34020	10-18147579	0.00501371	glutathione_S-transferase,_putative,_expressed
LOC_Os08g22960	8-13808662	0.00502378	retrotransposon_protein,_putative,_Ty3-gypsy_subclass,_expressed
LOC_Os06g23460	6-13694524	0.00502513	KH_domain_containing_protein,_putative,_expressed
LOC_Os04g28880	4-17122276	0.0050299	retrotransposon_protein,_putative,_Ty3-gypsy_subclass,_expressed
LOC_Os06g23160	6-13514904	0.00503734	bacterial_transferase_hexapeptide_domain_containing_protein,_expressed
LOC_Os08g25240	8-15335302	0.0050374	MBTB25_-_Bric-a-Brac,_Tramtrack,_Broad_Complex_BTB_domain_with_Meprin_and_TRAF_Homology_MATH_domain,_expressed
LOC_Os06g24670	6-14488748	0.00504323	retrotransposon_protein,_putative,_unclassified
LOC_Os06g23030	6-13439436	0.00504746	ZF-HD_protein_dimerisation_region_containing_protein,_expressed
LOC_Os08g17650	8-10795937	0.00504942	LYR_motif_containing_protein,_putative,_expressed
LOC_Os03g16530	3-9112560	0.00505063	retrotransposon_protein,_putative,_unclassified,_expressed
LOC_Os07g45490	7-27142840	0.00505924	expressed_protein
LOC_Os07g15480	7-8982519	0.00505981	retrotransposon_protein,_putative,_unclassified,_expressed
LOC_Os06g38294	6-22660409	0.0050625	peptide_transporter_PTR2,_putative,_expressed
LOC_Os04g53195	4-31672903	0.00506452	expressed_protein
LOC_Os05g49210	5-28239728	0.00506605	WRKY43,_expressed
LOC_Os02g30160	2-17924323	0.00506798	retrotransposon_protein,_putative,_unclassified,_expressed
LOC_Os04g44490	4-26333787	0.0050693	retrotransposon_protein,_putative,_unclassified,_expressed
LOC_Os01g11810	1-6387896	0.00507122	powdery_mildew_resistant_protein_5,_putative,_expressed
LOC_Os08g07740	8-4335240	0.00508232	histone-like_transcription_factor_and_archaeal_histone,_putative,_expressed
LOC_Os08g14390	8-8634280	0.00508539	expressed_protein
LOC_Os06g39290	6-23316418	0.00508802	expressed_protein
LOC_Os11g38850	11-23122512	0.00508829	TKL_IRAK_DUF26-la.7_-_DUF26_kinases_have_homology_to_DUF26_containing_loci,_expressed
LOC_Os01g73380	1-42527938	0.00508925	retrotransposon_protein,_putative,_Ty1-copia_subclass,_expressed
LOC_Os12g39590	12-24430043	0.00509102	retrotransposon_protein,_putative,_unclassified,_expressed
LOC_Os08g23790	8-14404484	0.00509367	polygalacturonase,_putative,_expressed
LOC_Os08g21490	8-12806451	0.00509512	retrotransposon_protein,_putative,_Ty3-gypsy_subclass,_expressed
LOC_Os08g44000	8-27695790	0.00509596	uncharacterized_protein_ycf39,_putative,_expressed
LOC_Os10g28320	10-14734576	0.00509668	oxidoreductase,_aldo/keto_reductase_family_protein,_putative,_expressed
LOC_Os07g31400	7-18599577	0.00509701	transposon_protein,_putative,_unclassified,_expressed
LOC_Os07g31390	7-18599577	0.00509701	beta-expansin_precursor,_putative,_expressed
LOC_Os08g23450	8-14196491	0.00509931	retrotransposon_protein,_putative,_unclassified,_expressed
LOC_Os02g56500	2-34599817	0.00509996	expressed_protein
LOC_Os02g13190	2-7028055	0.00510276	F-box_family_protein,_putative,_expressed
LOC_Os05g34440	5-20404946	0.005104	transposon_protein,_putative,_CACTA,_En/Spm_sub-class,_expressed
LOC_Os08g43800	8-27653851	0.00510568	carrier,_putative,_expressed
LOC_Os11g38000	11-22533863	0.00510762	NB-ARC_domain_containing_protein,_expressed
LOC_Os12g42610	12-26484027	0.00511305	YABBY_domain_containing_protein,_putative,_expressed
LOC_Os08g15350	8-9354646	0.00511464	retrotransposon_protein,_putative,_unclassified,_expressed
LOC_Os12g26770	12-15686420	0.0051155	retrotransposon_protein,_putative,_Ty3-gypsy_subclass,_expressed
LOC_Os04g45890	4-27172885	0.00511722	retrotransposon_protein,_putative,_unclassified,_expressed
LOC_Os06g37600	6-22261661	0.00512116	expressed_protein
LOC_Os07g40050	7-24046948	0.00512428	retrotransposon_protein,_putative,_unclassified,_expressed
LOC_Os01g06920	1-3283405	0.00512547	resistance_protein_SlVe1_precursor,_putative,_expressed
LOC_Os06g44100	6-26592085	0.00513643	HLS,_putative,_expressed
LOC_Os10g34220	10-18258240	0.00513698	TKL_IRAK_DUF26-lf.1_-_DUF26_kinases_have_homology_to_DUF26_containing_loci,_expressed
LOC_Os01g29310	1-16425182	0.00515356	retrotransposon_protein,_putative,_unclassified,_expressed
LOC_Os03g32840	3-18786253	0.0051645	retrotransposon_protein,_putative,_unclassified
LOC_Os09g13630	9-7927315	0.00516845	ZOS9-03_-_C2H2_zinc_finger_protein,_expressed
LOC_Os08g13880	8-8291361	0.00516849	expressed_protein
LOC_Os05g23500	5-13446964	0.00517818	retrotransposon_protein,_putative,_unclassified,_expressed
LOC_Os01g27770	1-15503966	0.00518025	expressed_protein
LOC_Os07g10220	7-5491224	0.00518321	anthocyanidin_3-O-glucosyltransferase,_putative,_expressed
LOC_Os08g16820	8-10292107	0.00519131	retrotransposon_protein,_putative,_SINE_subclass,_expressed
LOC_Os05g10670	5-5846654	0.00520349	zinc_finger_CCCH_type_family_protein,_putative,_expressed
LOC_Os02g22040	2-13106818	0.00520895	retrotransposon_protein,_putative,_unclassified
LOC_Os06g39250	6-23298591	0.00521577	transposon_protein,_putative,_unclassified,_expressed
LOC_Os09g33480	9-19737620	0.00521752	DAG_protein,_chloroplast_precursor,_putative,_expressed
LOC_Os11g07850	11-4005511	0.00522323	Protein-tyrosine_phosphatase_domain_containing_protein,_expressed
LOC_Os03g60470	3-34383465	0.00522378	glycine-rich_protein_A3,_putative,_expressed
LOC_Os07g44499	7-26567439	0.00522515	peroxidase,_putative,_expressed
LOC_Os01g47080	1-26890627	0.00522948	pyruvate_kinase,_putative,_expressed
LOC_Os01g47190	1-26972551	0.00522948	phosphoglycerate_mutase,_putative,_expressed
LOC_Os01g47256	1-27004581	0.00522948	exosome_complex_exonuclease_RRP40,_putative,_expressed
LOC_Os02g24780	2-14377199	0.00523072	retrotransposon_protein,_putative,_unclassified,_expressed
LOC_Os03g63430	3-35834831	0.00523318	proteasome_subunit,_putative,_expressed
LOC_Os09g06420	9-3023575	0.00523534	retrotransposon,_putative,_centromere-specific,_expressed
LOC_Os07g29010	7-17017437	0.00524036	transposon_protein,_putative,_CACTA,_En/Spm_sub-class,_expressed
LOC_Os01g31714	1-17361037	0.00524237	retrotransposon_protein,_putative,_unclassified,_expressed
LOC_Os03g31634	3-18059917	0.00524392	expressed_protein
LOC_Os06g44730	6-27000581	0.00524611	retrotransposon_protein,_putative,_unclassified,_expressed
LOC_Os10g33940	10-18051934	0.00524684	auxin_response_factor_18,_putative,_expressed
LOC_Os06g13470	6-7422122	0.00525053	SAM_dependent_carboxyl_methyltransferase,_putative,_expressed
LOC_Os05g01256	5-179187	0.00526335	helix-loop-helix_DNA-binding_domain_containing_protein,_expressed
LOC_Os08g23710	8-14340967	0.0052656	ribosomal_protein_L7Ae,_putative,_expressed
LOC_Os12g16220	12-9280616	0.00526887	nmrA-like_family_domain_containing_protein,_expressed
LOC_Os11g28610	11-16511633	0.0052731	transporter_family_protein,_putative,_expressed
LOC_Os12g18760	12-10855918	0.00527345	peptidase_family_C78_domain_containing_protein,_expressed
LOC_Os01g49070	1-28198218	0.00527436	expressed_protein
LOC_Os08g25030	8-15196972	0.00527462	plant_protein_of_unknown_function_domain_containing_protein,_expressed
LOC_Os02g01490	2-279795	0.00528387	expressed_protein
LOC_Os02g29010	2-17169082	0.00528525	retrotransposon_protein,_putative,_unclassified,_expressed
LOC_Os01g72400	1-41995140	0.00528531	retrotransposon_protein,_putative,_Ty1-copia_subclass,_expressed
LOC_Os07g46910	7-28045318	0.00529922	sex_determination_protein_tasselseed-2,_putative,_expressed
LOC_Os03g02830	3-1103495	0.00530103	cell_cycle_control_protein,_putative,_expressed
LOC_Os05g23270	5-13287021	0.00530251	hypothetical_protein
LOC_Os03g25590	3-14641322	0.00530375	retrotransposon_protein,_putative,_Ty3-gypsy_subclass,_expressed
LOC_Os07g31290	7-18529367	0.00530532	tyrosine_protein_kinase_domain_containing_protein,_putative,_expressed
LOC_Os06g23684	6-13836262	0.00530749	tyrosine_aminotransferase,_putative,_expressed
LOC_Os06g49850	6-30180156	0.00532245	expressed_protein
LOC_Os05g01420	5-245309	0.00532493	retrotransposon_protein,_putative,_unclassified,_expressed
LOC_Os05g24740	5-14341728	0.00532563	retrotransposon_protein,_putative,_unclassified
LOC_Os06g44970	6-27201623	0.00532952	auxin_efflux_carrier_component,_putative,_expressed
LOC_Os09g16280	9-9933541	0.00533735	hydroxyproline-rich_glycoprotein_family_protein,_putative,_expressed
LOC_Os02g52970	2-32407726	0.00534056	retrotransposon_protein,_putative,_Ty3-gypsy_subclass,_expressed
LOC_Os03g50010	3-28536151	0.00534191	toc64,_putative,_expressed
LOC_Os07g06870	7-3359089	0.00534553	hypothetical_protein
LOC_Os11g37940	11-22499835	0.00535126	WIP2_-_Wound-induced_protein_precursor,_expressed
LOC_Os03g40580	3-22562834	0.00535381	retrotransposon_protein,_putative,_unclassified,_expressed
LOC_Os07g43790	7-26202702	0.00535859	retrotransposon_protein,_putative,_unclassified,_expressed
LOC_Os05g48422	5-27764944	0.00535986	60S_ribosomal_protein-related,_putative,_expressed
LOC_Os12g03500	12-1388974	0.00536533	expressed_protein
LOC_Os10g34064	10-18185383	0.00536541	retrotransposon_protein,_putative,_unclassified,_expressed
LOC_Os01g32250	1-17668583	0.00536985	retrotransposon_protein,_putative,_unclassified,_expressed
LOC_Os04g08670	4-4708623	0.00537565	retrotransposon_protein,_putative,_unclassified,_expressed
LOC_Os08g09780	8-5652804	0.00538915	expressed_protein
LOC_Os01g29000	1-16238438	0.00539289	retrotransposon,_putative,_centromere-specific,_expressed
LOC_Os08g23530	8-14247363	0.00539638	retrotransposon_protein,_putative,_unclassified
LOC_Os11g44790	11-27107574	0.0053978	EAP30/Vps36_family_domain_containing_protein,_expressed
LOC_Os02g01270	2-149772	0.00540011	START_domain_containing_protein,_expressed
LOC_Os12g03020	12-1129352	0.00540163	transposon_protein,_putative,_CACTA,_En/Spm_sub-class
LOC_Os09g32290	9-19273800	0.00540531	FAD_dependent_oxidoreductase_domain_containing_protein,_expressed
LOC_Os08g20230	8-12143156	0.00540862	hypothetical_protein
LOC_Os05g17460	5-10029864	0.00541215	retrotransposon_protein,_putative,_Ty3-gypsy_subclass
LOC_Os04g16180	4-8787304	0.00541412	retrotransposon_protein,_putative,_unclassified
LOC_Os02g40470	2-24541184	0.00541744	retrotransposon_protein,_putative,_unclassified,_expressed
LOC_Os01g51200	1-29431626	0.0054257	CK1_CaseinKinase_1.3_-_CK1_includes_the_casein_kinase_1_kinases,_expressed
LOC_Os11g19390	11-11154734	0.00542573	retrotransposon_protein,_putative,_unclassified,_expressed
LOC_Os12g32380	12-19538726	0.00542701	40S_ribosomal_protein_S29,_putative,_expressed
LOC_Os10g11240	10-6235215	0.00542796	expressed_protein
LOC_Os08g04520	8-2233063	0.00543118	DEFL53_-_Defensin_and_Defensin-like_DEFL_family
LOC_Os01g48490	1-27795666	0.00543548	retrotransposon_protein,_putative,_Ty3-gypsy_subclass,_expressed
LOC_Os01g49830	1-28619643	0.00543759	B3_DNA_binding_domain_containing_protein,_expressed
LOC_Os07g29740	7-17482099	0.0054394	transposon_protein,_putative,_CACTA,_En/Spm_sub-class,_expressed
LOC_Os10g04690	10-2240421	0.00543954	expressed_protein
LOC_Os01g61100	1-35364147	0.00544553	transposon_protein,_putative,_unclassified,_expressed
LOC_Os01g72380	1-41982163	0.00544959	expressed_protein
LOC_Os06g23610	6-13772160	0.0054507	transposon_protein,_putative,_CACTA,_En/Spm_sub-class,_expressed
LOC_Os03g49020	3-27924938	0.00545073	hypothetical_protein
LOC_Os12g02490	12-845606	0.0054531	expressed_protein
LOC_Os08g25280	8-15354311	0.0054541	pentatricopeptide,_putative,_expressed
LOC_Os07g07940	7-3990491	0.00547178	expressed_protein
LOC_Os05g01520	5-308293	0.00547535	ECT_protein,_putative,_expressed
LOC_Os08g17120	8-10477935	0.00547596	transposon_protein,_putative,_CACTA,_En/Spm_sub-class
LOC_Os08g19920	8-11929795	0.00547662	retrotransposon_protein,_putative,_Ty3-gypsy_subclass,_expressed
LOC_Os08g22810	8-13709954	0.0054795	retrotransposon_protein,_putative,_unclassified,_expressed
LOC_Os09g22310	9-13479206	0.00548163	retrotransposon_protein,_putative,_unclassified,_expressed
LOC_Os12g02680	12-936174	0.00548677	expressed_protein
LOC_Os01g49410	1-28418354	0.00548997	expressed_protein
LOC_Os11g41370	11-24830283	0.00549136	retrotransposon_protein,_putative,_unclassified,_expressed
LOC_Os07g31260	7-18504660	0.00549358	expressed_protein
LOC_Os06g23570	6-13751466	0.00549405	expressed_protein
LOC_Os06g23630	6-13778655	0.00549405	transposon_protein,_putative,_CACTA,_En/Spm_sub-class
LOC_Os10g37710	10-20177912	0.00549415	hydrolase,_alpha/beta_fold_family_protein,_putative,_expressed
LOC_Os08g14330	8-8589983	0.00549518	aldose_1-epimerase,_putative,_expressed
LOC_Os02g29640	2-17632090	0.00550066	transposon_protein,_putative,_unclassified,_expressed
LOC_Os05g48450	5-27779920	0.00550219	aminotransferase_domain_containing_protein,_putative,_expressed
LOC_Os03g49120	3-27980404	0.00550652	transposon_protein,_putative,_unclassified,_expressed
LOC_Os03g36370	3-20167109	0.0055087	retrotransposon_protein,_putative,_unclassified
LOC_Os07g31190	7-18453786	0.00551706	OsWAK71_-_OsWAK_receptor-like_cytoplasmic_kinase_OsWAK-RLCK,_expressed
LOC_Os07g44480	7-26562546	0.00552356	peroxidase,_putative,_expressed
LOC_Os01g47180	1-26969026	0.00552364	3-5_exonuclease_domain-containing_protein,_putative,_expressed
LOC_Os12g17620	12-10090370	0.00552852	retrotransposon_protein,_putative,_unclassified,_expressed
LOC_Os09g07170	9-3510105	0.00553029	retrotransposon_protein,_putative,_unclassified,_expressed
LOC_Os02g30890	2-18435184	0.00553203	expressed_protein
LOC_Os12g35540	12-21610416	0.0055382	expressed_protein
LOC_Os10g24310	10-12451749	0.00554102	retrotransposon_protein,_putative,_Ty3-gypsy_subclass,_expressed
LOC_Os01g19720	1-11182915	0.00554186	transposon_protein,_putative,_CACTA,_En/Spm_sub-class,_expressed
LOC_Os03g43610	3-24372590	0.00554303	retrotransposon_protein,_putative,_Ty1-copia_subclass,_expressed
LOC_Os10g33390	10-17573678	0.00554431	hypothetical_protein
LOC_Os09g10240	9-5581462	0.00554612	retrotransposon_protein,_putative,_unclassified,_expressed
LOC_Os09g33590	9-19820903	0.00554733	retrotransposon_protein,_putative,_unclassified,_expressed
LOC_Os04g08828	4-4875593	0.00554867	cytochrome_P450,_putative,_expressed
LOC_Os09g10700	9-5829799	0.00554871	hypothetical_protein
LOC_Os06g19010	6-10815616	0.00556017	cadmium_tolerance_factor,_putative,_expressed
LOC_Os05g05840	5-2928916	0.00556174	tRNA_synthetase_class_II_core_domain_containing_protein,_expressed
LOC_Os02g52920	2-32354395	0.00556606	emp24/gp25L/p24_family_protein,_putative,_expressed
LOC_Os01g20894	1-11667666	0.00556879	expressed_protein
LOC_Os01g09665	1-4980758	0.00557419	expressed_protein
LOC_Os06g30680	6-17775096	0.00557488	WD_domain,_G-beta_repeat_domain_containing_protein,_expressed
LOC_Os08g16290	8-9943240	0.00557516	retrotransposon_protein,_putative,_unclassified,_expressed
LOC_Os06g30820	6-17871782	0.00557785	expressed_protein
LOC_Os05g16470	5-9352193	0.00557822	retrotransposon_protein,_putative,_unclassified,_expressed
LOC_Os02g48440	2-29664171	0.00558396	expressed_protein
LOC_Os03g16230	3-8950142	0.00558675	oxidoreductase,_short_chain_dehydrogenase/reductase_family_protein,_putative,_expressed
LOC_Os01g02560	1-846643	0.0055873	Ser/Thr_receptor-like_kinase,_putative,_expressed
LOC_Os01g25386	1-14351153	0.00559039	multidrug_resistance-associated_protein,_putative,_expressed
LOC_Os12g07620	12-3823975	0.00559203	ligA,_putative,_expressed
LOC_Os07g38860	7-23316644	0.00559411	OsGH3.10_-_Probable_indole-3-acetic_acid-amido_synthetase,_expressed
LOC_Os08g43850	8-27665771	0.00559674	carrier,_putative,_expressed
LOC_Os02g44704	2-27086696	0.00560639	LYR_motif_containing_protein,_putative,_expressed
LOC_Os01g73260	1-42467736	0.00562209	hypothetical_protein
LOC_Os10g19130	10-9742561	0.00562821	retrotransposon_protein,_putative,_Ty3-gypsy_subclass,_expressed
LOC_Os12g24170	12-13773247	0.00562824	beta-galactosidase_precursor,_putative,_expressed
LOC_Os08g17830	8-10939784	0.00563182	transposon_protein,_putative,_unclassified,_expressed
LOC_Os12g03090	12-1169745	0.005633	ribosomal_protein,_putative,_expressed
LOC_Os01g44200	1-25336880	0.00563571	retrotransposon_protein,_putative,_unclassified,_expressed
LOC_Os03g63370	3-35811655	0.00563885	CRAL/TRIO_domain_containing_protein,_expressed
LOC_Os03g63410	3-35826365	0.00564813	elongation_factor_Tu,_putative,_expressed
LOC_Os11g09350	11-5012793	0.00565251	expressed_protein
LOC_Os04g44630	4-26409777	0.00565528	transposon_protein,_putative,_unclassified,_expressed
LOC_Os11g13934	11-7709040	0.00565612	expressed_protein
LOC_Os02g41450	2-24817297	0.00565677	no_apical_meristem_protein,_putative,_expressed
LOC_Os12g01530	12-321276	0.00567116	ferritin-1,_chloroplast_precursor,_putative,_expressed
LOC_Os03g08120	3-4147983	0.0056785	retrotransposon_protein,_putative,_unclassified,_expressed
LOC_Os03g42410	3-23595975	0.00568117	B3_DNA_binding_domain_containing_protein
LOC_Os05g47890	5-27460309	0.00568286	WD_domain,_G-beta_repeat_domain_containing_protein,_expressed
LOC_Os05g01120	5-102259	0.00568638	cytochrome_P450,_putative,_expressed
LOC_Os10g20650	10-10429817	0.00569117	glucan_endo-1,3-beta-glucosidase-related,_putative,_expressed
LOC_Os09g23680	9-14078287	0.00569383	expressed_protein
LOC_Os09g10710	9-5840093	0.00569403	R-interacting_factor_1,_putative,_expressed
LOC_Os07g31460	7-18643803	0.0057012	peptide-Nasparagine_amidase,_putative,_expressed
LOC_Os10g24770	10-12738409	0.00570297	retrotransposon_protein,_putative,_unclassified,_expressed
LOC_Os07g46980	7-28073500	0.00570299	sex_determination_protein_tasselseed-2,_putative,_expressed
LOC_Os07g13728	7-7879018	0.00570437	hypothetical_protein
LOC_Os08g17740	8-10847781	0.00570507	transposon_protein,_putative,_CACTA,_En/Spm_sub-class,_expressed
LOC_Os08g12890	8-7653183	0.00570605	DNA_binding_protein,_putative,_expressed
LOC_Os01g73590	1-42635746	0.00570728	transporter_family_protein,_putative,_expressed
LOC_Os11g30050	11-17479482	0.00571219	expressed_protein
LOC_Os08g17480	8-10704833	0.00571518	retrotransposon_protein,_putative,_Ty3-gypsy_subclass,_expressed
LOC_Os04g48900	4-29169821	0.00572031	retrotransposon_protein,_putative,_Ty3-gypsy_subclass,_expressed
LOC_Os08g16990	8-10403569	0.00572063	retrotransposon_protein,_putative,_Ty1-copia_subclass,_expressed
LOC_Os03g26450	3-15118124	0.0057222	F-actin-capping_protein_subunit_beta,_putative,_expressed
LOC_Os06g30660	6-17752226	0.00573032	hypothetical_protein
LOC_Os03g63420	3-35830903	0.00573184	OsGrx_S14_-_glutaredoxin_subgroup_II,_expressed
LOC_Os04g53630	4-31966534	0.00573226	pentatricopeptide,_putative,_expressed
LOC_Os05g28250	5-16541605	0.00573602	retrotransposon,_putative,_centromere-specific
LOC_Os07g33420	7-19975971	0.00574358	hydroxylase,_putative,_expressed
LOC_Os02g25810	2-15121335	0.00574532	retrotransposon_protein,_putative,_unclassified,_expressed
LOC_Os03g38745	3-21521580	0.00574754	serine/arginine_repetitive_matrix_protein_1,_putative,_expressed
LOC_Os02g25170	2-14637451	0.00574811	retrotransposon_protein,_putative,_unclassified,_expressed
LOC_Os04g53320	4-31763074	0.00574954	expressed_protein
LOC_Os05g06110	5-3056471	0.0057569	villin,_putative,_expressed
LOC_Os06g19520	6-11113894	0.00575872	transposon_protein,_putative,_CACTA,_En/Spm_sub-class,_expressed
LOC_Os04g35130	4-21351441	0.00575974	expressed_protein
LOC_Os06g36700	6-21601441	0.00576491	T-complex_protein,_putative,_expressed
LOC_Os04g11680	4-6409593	0.00577147	retrotransposon_protein,_putative,_Ty3-gypsy_subclass,_expressed
LOC_Os07g44780	7-26727471	0.00577755	GDSL-like_lipase/acylhydrolase,_putative,_expressed
LOC_Os09g21960	9-13296871	0.00577792	transposon_protein,_putative,_CACTA,_En/Spm_sub-class
LOC_Os11g24540	11-14004365	0.0057839	signal_peptide_peptidase-like_2B,_putative,_expressed
LOC_Os08g24500	8-14796613	0.00578445	retrotransposon_protein,_putative,_Ty3-gypsy_subclass,_expressed
LOC_Os04g01439	4-301666	0.00579235	retrotransposon_protein,_putative,_unclassified,_expressed
LOC_Os06g23600	6-13765147	0.00579349	expressed_protein
LOC_Os06g03940	6-1589246	0.00579754	spastin,_putative,_expressed
LOC_Os08g21434	8-12779456	0.00579816	retrotransposon,_putative,_centromere-specific,_expressed
LOC_Os08g23740	8-14366376	0.00580188	OsSub55_-_Putative_Subtilisin_homologue,_expressed
LOC_Os05g17050	5-9738201	0.00580579	transposon_protein,_putative,_CACTA,_En/Spm_sub-class,_expressed
LOC_Os02g28250	2-16712255	0.00580976	transposon_protein,_putative,_CACTA,_En/Spm_sub-class,_expressed
LOC_Os08g43840	8-27663787	0.00581568	expressed_protein
LOC_Os08g43890	8-27673812	0.00581568	carrier,_putative,_expressed
LOC_Os08g43940	8-27684896	0.00581568	carrier,_putative,_expressed
LOC_Os06g22890	6-13367738	0.00582104	transposon_protein,_putative,_CACTA,_En/Spm_sub-class,_expressed
LOC_Os06g37650	6-22305652	0.00582175	hypothetical_protein
LOC_Os08g24680	8-14914251	0.00582305	retrotransposon_protein,_putative,_unclassified,_expressed
LOC_Os06g23590	6-13755485	0.00582481	expressed_protein
LOC_Os05g24800	5-14372149	0.00582555	retrotransposon_protein,_putative,_unclassified,_expressed
LOC_Os02g52840	2-32311180	0.00583153	flavonol_synthase/flavanone_3-hydroxylase,_putative,_expressed
LOC_Os01g72370	1-41971768	0.00583431	helix-loop-helix_DNA-binding_domain_containing_protein,_expressed
LOC_Os05g37760	5-22105835	0.00583589	retrotransposon_protein,_putative,_unclassified,_expressed
LOC_Os03g36570	3-20276104	0.00583592	retrotransposon_protein,_putative,_Ty3-gypsy_subclass,_expressed
LOC_Os03g38620	3-21432536	0.00583645	retrotransposon_protein,_putative,_unclassified,_expressed
LOC_Os01g60650	1-35064645	0.00583914	non-green_plastid_inner_envelope_membrane_protein,_putative,_expressed
LOC_Os06g38050	6-22496680	0.00584069	transposon_protein,_putative,_CACTA,_En/Spm_sub-class,_expressed
LOC_Os01g09305	1-4732989	0.00584582	EMB1895,_putative,_expressed
LOC_Os07g16030	7-9346900	0.00584712	expressed_protein
LOC_Os06g15410	6-8754458	0.00585075	angel,_putative,_expressed
LOC_Os06g18830	6-10691343	0.005851	AGC_PVPK_like_kin82y.13_-_ACG_kinases_include_homologs_to_PKA,_PKG_and_PKC,_expressed
LOC_Os01g72960	1-42315367	0.00585254	expressed_protein
LOC_Os03g14990	3-8181501	0.00586478	chorismate_synthase_2,_chloroplast_precursor,_putative,_expressed
LOC_Os01g73570	1-42621912	0.00586479	vacuolar_protein_sorting_55_family_protein,_putative,_expressed
LOC_Os08g16840	8-10299892	0.00586596	OsFBL45_-_F-box_domain_and_LRR_containing_protein,_expressed
LOC_Os08g01740	8-450371	0.00588087	VHS_and_GAT_domain_containing_protein,_expressed
LOC_Os09g20870	9-12563850	0.00588634	expressed_protein
LOC_Os07g18100	7-10711917	0.00588697	conserved_hypothetical_protein
LOC_Os06g33290	6-19381737	0.00589915	retrotransposon_protein,_putative,_Ty3-gypsy_subclass,_expressed
LOC_Os11g29690	11-17208537	0.00590058	oxidoreductase,_2OG-Fe_oxygenase_family_protein,_putative,_expressed
LOC_Os05g11840	5-6750835	0.00590473	expressed_protein
LOC_Os11g35540	11-20832452	0.00590523	expressed_protein
LOC_Os02g14740	2-8151743	0.00590662	expressed_protein
LOC_Os01g09760	1-5034804	0.00590768	DIRP_family_protein,_putative,_expressed
LOC_Os09g34060	9-20094673	0.00591063	transcription_factor_RF2a,_putative,_expressed
LOC_Os12g26010	12-15112542	0.00591188	retrotransposon_protein,_putative,_Ty1-copia_subclass,_expressed
LOC_Os12g26030	12-15122407	0.00591188	FACT_complex_subunit_SPT16,_putative,_expressed
LOC_Os07g30660	7-18141202	0.00591559	retrotransposon_protein,_putative,_Ty3-gypsy_subclass,_expressed
LOC_Os01g73550	1-42614936	0.00591709	mitochondrial-processing_peptidase_subunit_alpha,_mitochondrial_precursor,_putative,_expressed
LOC_Os09g32090	9-19152823	0.00591802	methyl-binding_domain_protein_MBD,_putative,_expressed
LOC_Os01g73500	1-42587304	0.00592028	expressed_protein
LOC_Os01g73514	1-42590949	0.00592028	5-oxoprolinase,_putative,_expressed
LOC_Os01g73540	1-42613787	0.00592028	YGGT_family_protein,_putative,_expressed
LOC_Os09g13600	9-7901746	0.00592632	expressed_protein
LOC_Os08g44690	8-28085734	0.00592634	transposon_protein,_putative,_Pong_sub-class,_expressed
LOC_Os06g23400	6-13664201	0.00593349	expressed_protein
LOC_Os07g30100	7-17751735	0.00593793	RIN3,_putative,_expressed
LOC_Os01g07270	1-3430841	0.00594131	transposon_protein,_putative,_unclassified,_expressed
LOC_Os02g08390	2-4466809	0.00594154	transposon_protein,_putative,_CACTA,_En/Spm_sub-class,_expressed
LOC_Os05g20770	5-12194621	0.00594233	retrotransposon_protein,_putative,_Ty3-gypsy_subclass,_expressed
LOC_Os06g12350	6-6694504	0.00594352	amino_acid_transporter,_putative,_expressed
LOC_Os11g29220	11-16941396	0.00595143	hypothetical_protein
LOC_Os02g52900	2-32350356	0.00595406	glutaredoxin_2,_putative,_expressed
LOC_Os02g52910	2-32350356	0.00595406	zinc_finger_protein,_putative,_expressed
LOC_Os08g19080	8-11387639	0.00595596	retrotransposon_protein,_putative,_unclassified,_expressed
LOC_Os12g38410	12-23576847	0.00595645	TNP1,_putative
LOC_Os04g10170	4-5504372	0.00595912	hypothetical_protein
LOC_Os01g12070	1-6565457	0.00596194	endoglucanase_precursor,_putative,_expressed
LOC_Os02g49210	2-30083335	0.00596288	expressed_protein
LOC_Os06g14550	6-8197078	0.00596342	signal_recognition_particle_9_kDa_protein,_putative,_expressed
LOC_Os02g07654	2-3978361	0.00596678	expressed_protein
LOC_Os12g35000	12-21306662	0.00597183	retrotransposon_protein,_putative,_unclassified,_expressed
LOC_Os07g15890	7-9231478	0.0059791	retrotransposon_protein,_putative,_Ty1-copia_subclass
LOC_Os11g30360	11-17625819	0.00598039	expressed_protein
LOC_Os12g01470	12-286904	0.00598248	retrotransposon_protein,_putative,_Ty1-copia_subclass,_expressed
LOC_Os03g46810	3-26474827	0.00598353	retrotransposon_protein,_putative,_Ty1-copia_subclass,_expressed
LOC_Os05g01330	5-207987	0.00598877	expressed_protein
LOC_Os01g21220	1-11841093	0.00598891	retrotransposon_protein,_putative,_unclassified
LOC_Os08g16110	8-9820270	0.00599061	expressed_protein
LOC_Os11g30730	11-17893167	0.00599272	transposon_protein,_putative,_CACTA,_En/Spm_sub-class,_expressed
LOC_Os02g44160	2-26736978	0.00599855	retrotransposon_protein,_putative,_Ty3-gypsy_subclass,_expressed
LOC_Os09g07430	9-3713344	0.00601039	retrotransposon,_putative,_centromere-specific,_expressed
LOC_Os07g31440	7-18623649	0.00601293	expressed_protein
LOC_Os08g38040	8-24105640	0.00602595	transposon_protein,_putative,_unclassified,_expressed
LOC_Os12g25700	12-14894676	0.00602909	UDP-glucose_6-dehydrogenase,_putative,_expressed
LOC_Os11g24000	11-13602020	0.0060448	retrotransposon_protein,_putative,_Ty3-gypsy_subclass,_expressed
LOC_Os05g11780	5-6697395	0.00605517	mitochondrial_carrier_protein,_putative,_expressed
LOC_Os02g04360	2-1921468	0.00606119	expressed_protein
LOC_Os07g31420	7-18610944	0.00606335	transposon_protein,_putative,_unclassified,_expressed
LOC_Os07g31450	7-18626131	0.00606335	CHR4/MI-2-LIKE,_putative,_expressed
LOC_Os08g17150	8-10504179	0.00606609	expressed_protein
LOC_Os05g48030	5-27536164	0.00606819	anti-silencing_protein,_ASF1-like_domain_containing_protein,_expressed
LOC_Os02g47490	2-29019422	0.00606969	expressed_protein
LOC_Os01g65360	1-37928263	0.00608519	expressed_protein
LOC_Os06g37880	6-22428660	0.00609128	expressed_protein
LOC_Os05g41720	5-24404895	0.00609488	retrotransposon_protein,_putative,_unclassified,_expressed
LOC_Os06g22550	6-13108471	0.00609722	transducin_family_protein,_putative,_expressed
LOC_Os10g38790	10-20647423	0.00609872	expressed_protein
LOC_Os03g29950	3-17069954	0.0061022	glucose-6-phosphate_1-dehydrogenase,_chloroplast_precursor,_putative,_expressed
LOC_Os06g03550	6-1370414	0.00610293	hypothetical_protein
LOC_Os07g44020	7-26310958	0.00610562	SNARE_associated_Golgi_protein,_putative,_expressed
LOC_Os08g23620	8-14296596	0.00610714	retrotransposon_protein,_putative,_Ty3-gypsy_subclass
LOC_Os03g46590	3-26373832	0.00611023	transposon_protein,_putative,_unclassified,_expressed
LOC_Os12g40030	12-24753199	0.00611095	retrotransposon_protein,_putative,_Ty3-gypsy_subclass,_expressed
LOC_Os12g32040	12-19332654	0.00611116	ZmEBE-1_protein,_putative,_expressed
LOC_Os01g60540	1-35010338	0.00611241	WRKY20,_expressed
LOC_Os07g15260	7-8797458	0.00611769	retrotransposon_protein,_putative,_Ty1-copia_subclass,_expressed
LOC_Os08g17040	8-10433119	0.00612236	retrotransposon_protein,_putative,_unclassified,_expressed
LOC_Os08g24200	8-14607861	0.00612236	expressed_protein
LOC_Os01g41080	1-23267100	0.00612265	retrotransposon_protein,_putative,_unclassified,_expressed
LOC_Os04g53190	4-31669472	0.00612568	CPuORF12_-_conserved_peptide_uORF-containing_transcript,_expressed
LOC_Os04g10300	4-5563777	0.00612603	hypothetical_protein
LOC_Os02g18590	2-10839477	0.00612765	retrotransposon_protein,_putative,_Ty3-gypsy_subclass,_expressed
LOC_Os02g57210	2-35053009	0.00612963	expressed_protein
LOC_Os08g17860	8-10951937	0.00613204	transposon_protein,_putative,_Pong_sub-class,_expressed
LOC_Os06g30901	6-17947501	0.00613756	HEAT_repeat_family_protein,_putative,_expressed
LOC_Os04g19590	4-10914797	0.00614393	retrotransposon_protein,_putative,_Ty3-gypsy_subclass,_expressed
LOC_Os06g23640	6-13787382	0.00614408	expressed_protein
LOC_Os03g27890	3-16020134	0.00614544	expressed_protein
LOC_Os01g27150	1-15132338	0.00614603	cullin,_putative,_expressed
LOC_Os06g29650	6-17003810	0.00614707	CDP-diacylglycerol--inositol_3-phosphatidyltransferase_1,_putative,_expressed
LOC_Os11g27810	11-16011492	0.00614712	retrotransposon_protein,_putative,_unclassified,_expressed
LOC_Os03g42420	3-23610210	0.00614883	B3_DNA_binding_domain_containing_protein,_expressed
LOC_Os08g18190	8-11152672	0.00614977	transposon_protein,_putative,_CACTA,_En/Spm_sub-class,_expressed
LOC_Os08g24210	8-14610238	0.00615588	agmatine_coumaroyltransferase,_putative,_expressed
LOC_Os06g37710	6-22338146	0.00616155	hypothetical_protein
LOC_Os07g30040	7-17701692	0.00616328	retrotransposon_protein,_putative,_unclassified,_expressed
LOC_Os10g39044	10-20812734	0.00617321	expressed_protein
LOC_Os02g22690	2-13520641	0.00617472	retrotransposon,_putative,_centromere-specific
LOC_Os11g22430	11-12877890	0.00617951	retrotransposon_protein,_putative,_Ty3-gypsy_subclass,_expressed
LOC_Os04g17160	4-9418597	0.006181	expressed_protein
LOC_Os01g21240	1-11856807	0.00618281	MLA6_protein,_putative,_expressed
LOC_Os05g08694	5-4764468	0.00618585	retrotransposon_protein,_putative,_unclassified,_expressed
LOC_Os09g32490	9-19392519	0.00618913	retrotransposon_protein,_putative,_unclassified
LOC_Os06g22840	6-13323470	0.00619168	retrotransposon_protein,_putative,_unclassified
LOC_Os03g56572	3-32228903	0.00619343	retrotransposon_protein,_putative,_Ty3-gypsy_subclass,_expressed
LOC_Os03g15910	3-8789042	0.00619865	membrane_protein,_putative,_expressed
LOC_Os03g15920	3-8789042	0.00619865	expressed_protein
LOC_Os04g24350	4-13953127	0.00620288	retrotransposon_protein,_putative,_Ty1-copia_subclass,_expressed
LOC_Os10g25502	10-13193833	0.0062029	retrotransposon_protein,_putative,_unclassified,_expressed
LOC_Os08g25140	8-15273781	0.00620472	ethanol_tolerance_protein_GEKO1,_putative,_expressed
LOC_Os01g13650	1-7650833	0.00620473	retrotransposon_protein,_putative,_unclassified,_expressed
LOC_Os06g11680	6-6191575	0.00620948	phosphate-induced_protein_1_conserved_region_domain_containing_protein,_expressed
LOC_Os03g02514	3-923273	0.00621016	hydrolase,_alpha/beta_fold_family_protein,_putative,_expressed
LOC_Os08g25310	8-15391803	0.00621162	phosphatidylinositol_transfer,_putative,_expressed
LOC_Os05g11940	5-6795648	0.00621566	retrotransposon_protein,_putative,_Ty1-copia_subclass,_expressed
LOC_Os04g08480	4-4575556	0.00621865	transposon_protein,_putative,_CACTA,_En/Spm_sub-class,_expressed
LOC_Os04g15930	4-8651283	0.00622429	retrotransposon_protein,_putative,_unclassified,_expressed
LOC_Os08g42860	8-27100955	0.00623054	retrotransposon_protein,_putative,_unclassified,_expressed
LOC_Os02g24190	2-14008299	0.00623393	cyclin-T1-2,_putative,_expressed
LOC_Os09g16890	9-10317443	0.0062341	transposon_protein,_putative,_CACTA,_En/Spm_sub-class,_expressed
LOC_Os11g27290	11-15697707	0.00623455	transposon_protein,_putative,_CACTA,_En/Spm_sub-class
LOC_Os08g12910	8-7676624	0.00623611	retrotransposon_protein,_putative,_unclassified,_expressed
LOC_Os02g16590	2-9482029	0.00623951	transposon_protein,_putative,_CACTA,_En/Spm_sub-class,_expressed
LOC_Os05g01006	5-26755	0.00624448	retrotransposon_protein,_putative,_unclassified,_expressed
LOC_Os08g08820	8-5110602	0.00624665	homeobox_and_START_domains_containing_protein,_putative,_expressed
LOC_Os01g13660	1-7653048	0.00625119	expressed_protein
LOC_Os11g18420	11-10396975	0.00626284	retrotransposon_protein,_putative,_Ty3-gypsy_subclass
LOC_Os01g73580	1-42626565	0.00626706	glycosyl_hydrolases,_putative,_expressed
LOC_Os05g15240	5-8645066	0.00626967	expressed_protein
LOC_Os06g01480	6-290430	0.00627051	NAC_domain_containing_protein,_putative,_expressed
LOC_Os07g22620	7-12736278	0.00627808	retrotransposon_protein,_putative,_unclassified,_expressed
LOC_Os10g26080	10-13511132	0.00627815	transposon_protein,_putative,_CACTA,_En/Spm_sub-class,_expressed
LOC_Os07g37900	7-22744346	0.00628483	retrotransposon_protein,_putative,_unclassified,_expressed
LOC_Os06g44760	6-27044798	0.00628794	expressed_protein
LOC_Os04g16850	4-9223568	0.0062898	retrotransposon,_putative,_centromere-specific,_expressed
LOC_Os04g57230	4-34091958	0.00629079	regulatory_protein_RecX_family_protein,_putative,_expressed
LOC_Os10g28510	10-14831464	0.00629223	expressed_protein
LOC_Os03g49040	3-27939447	0.00629286	transposon_protein,_putative,_CACTA,_En/Spm_sub-class,_expressed
LOC_Os03g04020	3-1833439	0.00629304	expansin_precursor,_putative,_expressed
LOC_Os07g45480	7-27135734	0.0062999	expressed_protein
LOC_Os09g35990	9-20741312	0.00630127	expressed_protein
LOC_Os03g21290	3-12178692	0.00630211	retrotransposon_protein,_putative,_Ty3-gypsy_subclass,_expressed
LOC_Os12g13050	12-7245979	0.00630537	hypothetical_protein
LOC_Os07g14770	7-8437215	0.00630542	expressed_protein
LOC_Os08g16680	8-10202522	0.00630987	retrotransposon_protein,_putative,_Ty1-copia_subclass,_expressed
LOC_Os03g12290	3-6460538	0.00631037	glutamine_synthetase,_catalytic_domain_containing_protein,_expressed
LOC_Os03g55220	3-31424247	0.00631411	bHelix-loop-helix_transcription_factor,_putative,_expressed
LOC_Os02g25560	2-14932919	0.00631702	transposon_protein,_putative,_CACTA,_En/Spm_sub-class,_expressed
LOC_Os07g10520	7-5663758	0.00631762	nucleotide_binding_protein,_putative,_expressed
LOC_Os03g18800	3-10536781	0.00632122	retrotransposon_protein,_putative,_Ty3-gypsy_subclass
LOC_Os07g27070	7-15686369	0.00632328	retrotransposon_protein,_putative,_unclassified,_expressed
LOC_Os02g14680	2-8093592	0.00632686	UDP-glucoronosyl_and_UDP-glucosyl_transferase_domain_containing_protein,_expressed
LOC_Os01g51634	1-29671839	0.00633232	myosin-2_heavy_chain,_non_muscle,_putative,_expressed
LOC_Os01g60290	1-34887030	0.00633278	expressed_protein
LOC_Os01g72430	1-42004097	0.00633336	NADPH_quinone_oxidoreductase,_putative,_expressed
LOC_Os06g25230	6-14760070	0.00633461	retrotransposon_protein,_putative,_unclassified,_expressed
LOC_Os10g42480	10-22901946	0.00634135	retrotransposon_protein,_putative,_unclassified,_expressed
LOC_Os08g20020	8-11985278	0.006342	octicosapeptide/Phox/Bem1p,_putative,_expressed
LOC_Os02g19924	2-11720804	0.00634219	aminotransferase,_classes_I_and_II,_domain_containing_protein,_expressed
LOC_Os02g57530	2-35252450	0.00634442	ethylene_receptor,_putative,_expressed
LOC_Os02g57220	2-35056988	0.00634697	WD_domain,_G-beta_repeat_domain_containing_protein,_expressed
LOC_Os07g06110	7-2960564	0.00634772	retrotransposon_protein,_putative,_Ty3-gypsy_subclass,_expressed
LOC_Os08g12990	8-7708226	0.00634907	retrotransposon_protein,_putative,_unclassified,_expressed
LOC_Os03g60340	3-34311874	0.00634977	leaf_senescence_related_protein,_putative,_expressed
LOC_Os11g43150	11-26039947	0.00635187	transposon_protein,_putative,_CACTA,_En/Spm_sub-class,_expressed
LOC_Os03g35690	3-19768410	0.00635228	retrotransposon_protein,_putative,_Ty3-gypsy_subclass,_expressed
LOC_Os06g15400	6-8751385	0.00635623	expressed_protein
LOC_Os07g47340	7-28311533	0.00636328	expressed_protein
LOC_Os03g39210	3-21778999	0.00636555	retrotransposon_protein,_putative,_unclassified,_expressed
LOC_Os11g30000	11-17441416	0.00636562	retrotransposon_protein,_putative,_unclassified,_expressed
LOC_Os06g01150	6-126499	0.00636688	retrotransposon_protein,_putative,_unclassified
LOC_Os01g61340	1-35489198	0.00637139	expressed_protein
LOC_Os07g43120	7-25842281	0.00637362	transposon_protein,_putative,_unclassified,_expressed
LOC_Os07g11090	7-6128764	0.00637435	retrotransposon_protein,_putative,_unclassified,_expressed
LOC_Os09g26010	9-15635350	0.00637725	hypothetical_protein
LOC_Os06g38062	6-22507837	0.0063782	transposon_protein,_putative,_CACTA,_En/Spm_sub-class
LOC_Os10g16690	10-8321743	0.00637852	retrotransposon_protein,_putative,_unclassified,_expressed
[truncated: 1,433 more rows]
